# Supplementary material for: A proteogenomic RNA processing mechanism drives sex differences in meningioma
Source: Research Square preprint supplement (doi:10.21203/rs.3.rs-9675139/v1), 2026-06-02
Supplement: Supplementary file 2 [file 8c1ba8028069e44c730b4033.xlsx]

## Sheet: SupplementaryTable1
Supplementary Table 1. Top 2000 differentially expressed proteins in meningioma (log2 transformed protein intensities).
Protein	Gene	Raleigh_P3_G6_1_1319_1	Raleigh_P7_A1_1_2238_1	Raleigh_P4_A4_1_1151_1	Raleigh_P5_A4_1_1437_1	Raleigh_P7_E2_1_2279_1	Raleigh_P3_H5_1_1305_1	Raleigh_P7_F5_1_2305_1	Raleigh_P7_F4_1_2304_1	Raleigh_P7_C2_1_2259_1	Raleigh_P7_G9_1_2319_1	Raleigh_P3_C11_1_1378_1	Raleigh_P5_F8_1_1508_1	Raleigh_P7_C5_1_2262_1	Raleigh_P1_G3_1_990_1	Raleigh_P7_H4_1_2324_1	Raleigh_P3_B11_1_1391_1	Raleigh_P1_A1_1_905_1	Raleigh_P4_F7_1_1258_1	Raleigh_P3_E6_1_1345_1	Raleigh_P5_H7_1_1533_1	Raleigh_P3_B6_1_1386_1	Raleigh_P7_F9_1_2309_1	Raleigh_P4_E5_1_1269_1	Raleigh_P4_B11_1_1171_1	Raleigh_P7_C9_1_2266_1	Raleigh_P7_B8_1_2255_1	Raleigh_P1_A10_1_914_1	Raleigh_P7_D4_1_2271_1	Raleigh_P1_A9_1_913_1	Raleigh_P5_B6_1_1452_1	Raleigh_P4_C7_1_1180_1	Raleigh_P4_E8_1_1272_1	Raleigh_P4_H2_1_1227_1	Raleigh_P3_B8_1_1388_1	Raleigh_P5_E6_1_1493_1	Raleigh_P4_D3_1_1189_1	Raleigh_P1_D7_1_953_1	Raleigh_P7_F3_1_2303_1	Raleigh_P7_F7_1_2307_1	Raleigh_P3_C5_1_1372_1	Raleigh_P7_D7_1_2274_1	Raleigh_P7_H7_1_2327_1	Raleigh_P4_F2_1_1253_1	Raleigh_P7_A8_1_2245_1	Raleigh_P4_H3_1_1228_1	Raleigh_P2_D8_1_1080_1	Raleigh_P3_E4_1_1343_1	Raleigh_P7_F2_1_2302_1
Ubiquitin carboxyl-terminal hydrolase 17-like protein 3 (EC 3.4.19.12) (Deubiquitinating enzyme 17-like protein 3) (Ubiquitin thioesterase 17-like protein 3) (Ubiquitin-specific-processing protease 17-like protein 3)	USP17L3	0	0	0	0	0	0	0	0	0	0	0	0	0	0	0	0	0	0	13.8692	0	0	0	0	0	0	13.6361	0	0	0	0	0	14.2591	0	15.3717	0	0	12.9499	0	0	0	13.2115	0	0	13.4079	0	0	0	0
Histone H2A type 2-B (H2A-clustered histone 21)	H2AC21	12.0007	11.1234	11.141	9.00499	12.2611	11.6763	0	0	12.1011	0	13.9864	0	12.3037	12.9116	13.263	9.77302	10.4848	10.8293	0	12.0239	12.6949	0	0	0	0	0	11.4501	12.5663	9.74005	0	0	12.8501	13.1784	10.9795	10.3949	11.2198	0	10.1461	0	0	0	11.1164	12.6475	9.8271	10.9376	11.2103	11.4318	12.8658
Ribosomal protein eL42-like (60S ribosomal protein L36a-like) (Large ribosomal subunit protein eL42-like)	RPL36AL	0	0	11.8532	0	12.9432	0	0	12.7577	11.5843	0	0	11.3743	12.6326	11.347	12.4184	15.4686	10.5764	0	13.5005	12.972	18.2402	12.0216	0	0	0	12.4491	0	10.978	12.2773	0	0	10.5693	0	0	10.395	13.1574	0	0	0	0	12.3011	0	13.3944	11.3534	10.9692	0	0	0
Hemoglobin subunit epsilon (Epsilon-globin) (Hemoglobin epsilon chain)	HBE1	0	0	0	16.6097	0	0	14.1772	0	0	12.2014	10.7566	16.2521	0	0	0	0	0	0	0	15.0641	0	14.2403	0	17.0479	12.9574	0	0	0	0	14.7879	17.8262	0	0	0	0	0	0	13.4686	12.9599	11.557	0	13.3002	0	14.9641	0	7.23813	0	0
Heterogeneous nuclear ribonucleoproteins A2/B1 (hnRNP A2/B1)	HNRNPA2B1	0	10.5156	0	12.1169	11.9549	11.5757	11.393	8.72709	10.6443	0	0	0	9.89339	0	8.75964	10.1527	10.5907	10.5858	0	0	0	11.3281	10.895	12.7547	0	0	0	10.2099	12.3821	0	12.592	11.4328	12.6141	0	0	11.6338	12.4168	12.4747	0	0	0	12.4316	11.0739	11.6224	10.9243	11.6992	0	9.26509
DNA-binding protein RFX5 (Regulatory factor X 5)	RFX5	0	0	13.057	13.842	13.3766	12.34	0	0	0	0	0	0	0	11.8501	0	0	0	0	11.79	0	0	13.9019	0	10.6332	0	13.0594	0	0	0	0	0	11.2301	0	0	11.3222	0	0	0	0	0	0	12.5833	0	12.994	9.38993	0	0	0
Immunoglobulin lambda variable 2-11 (Ig gamma lambda chain V-II region DOT) (Ig lambda chain V-II region BOH) (Ig lambda chain V-II region BUR) (Ig lambda chain V-II region NIG-58) (Ig lambda chain V-II region TRO) (Ig lambda chain V-II region WIN)	IGLV2-11	14.8221	0	14.4808	16.7365	13.785	0	0	11.4826	0	10.1751	0	0	12.6562	12.499	12.9705	0	8.90322	0	0	0	0	0	0	14.0621	0	0	10.1269	12.3986	0	14.343	13.7941	0	10.9384	0	11.1355	0	9.94737	0	0	0	0	12.6894	12.3052	14.2449	0	0	14.2486	0
Proteolipid protein 2 (Differentiation-dependent protein A4) (Intestinal membrane A4 protein)	PLP2	0	0	0	0	0	0	0	0	0	0	0	0	0	12.0886	0	0	0	0	0	0	0	11.9889	12.5185	0	13.2832	13.5978	0	0	0	12.0708	12.2048	0	0	0	0	0	10.511	12.6492	0	0	0	0	0	0	0	0	0	0
Hemoglobin subunit gamma-2 (Gamma-2-globin) (Hb F Ggamma) (Hemoglobin gamma-2 chain) (Hemoglobin gamma-G chain)	HBG2	10.0082	11.0285	0	12.7169	9.57863	0	10.5531	10.9345	0	0	0	11.8749	9.4564	11.8755	8.88501	0	10.4	9.00384	16.1286	0	0	13.5058	16.3012	12.3374	0	0	0	11.3152	0	11.0363	11.2898	10.9839	9.2362	14.1024	10.0468	8.33281	11.1394	11.5525	0	12.4262	0	0	11.9205	9.26769	9.52741	10.711	0	0
Plasma membrane calcium-transporting ATPase 3 (PMCA3) (EC 7.2.2.10) (Plasma membrane calcium ATPase isoform 3) (Plasma membrane calcium pump isoform 3)	ATP2B3	0	0	0	0	0	0	0	0	12.7908	0	0	11.0826	0	0	0	0	11.9073	0	0	0	0	0	0	15.3516	11.6384	0	0	8.85763	13.2898	0	0	0	0	0	0	0	0	0	0	0	0	0	0	12.4321	0	0	0	0
Phytanoyl-CoA hydroxylase-interacting protein (Phytanoyl-CoA hydroxylase-associated protein 1) (PAHX-AP1) (PAHXAP1)	PHYHIP	0	12.372	0	0	0	0	0	12.4141	13.2511	0	0	0	12.4072	0	0	0	12.8199	10.9945	8.95556	0	0	0	0	9.28607	0	0	9.98155	12.6981	0	0	0	9.07512	10.6123	0	0	0	0	0	11.086	0	0	0	10.2636	0	9.38595	12.7565	9.31026	0
Serine protease 1 (EC 3.4.21.4) (Anionic trypsin I) (Anionic trypsin-I) (Beta-trypsin) (Cationic trypsinogen) (Pretrypsinogen I) (Trypsin I) (Trypsin-1) [Cleaved into: Alpha-trypsin chain 1; Alpha-trypsin chain 2]	PRSS1	0	0	0	0	0	0	14.1843	0	0	14.9189	0	0	0	10.6281	0	0	0	0	0	0	13.6247	14.6226	11.823	0	0	11.7601	0	0	0	11.0465	0	0	0	0	11.209	11.5444	0	14.355	0	0	0	13.5786	0	11.4041	0	0	0	0
Abnormal spindle-like microcephaly-associated protein (Abnormal spindle protein homolog) (Asp homolog)	ASPM	0	0	10.3097	0	0	0	0	0	10.6114	0	0	0	10.186	0	10.209	9.78387	0	0	11.7297	14.1086	0	0	0	0	12.2266	0	8.91008	10.5266	8.27733	0	10.1941	9.27512	0	0	0	0	0	0	0	0	0	12.7177	0	0	0	0	0	0
ATP synthase subunit f, mitochondrial (ATP synthase membrane subunit f)	ATP5MF	10.1401	0	0	0	0	0	0	14.4239	14.2021	0	0	0	14.25	0	13.7733	10.8848	13.8464	12.9562	0	0	9.71615	0	0	0	0	0	10.743	14.9345	11.0822	0	0	0	12.5041	10.003	0	11.9846	0	0	0	9.02528	0	0	12.7105	0	12.2857	13.1153	11.748	12.2132
Immunoglobulin heavy variable 6-1	IGHV6-1	0	0	12.5292	13.5818	12.2699	0	12.4286	0	0	0	0	11.9119	0	13.8588	0	0	0	0	13.5043	10.4457	0	0	11.4916	0	10.7186	0	0	0	0	11.4175	12.9713	0	0	12.5544	10.7108	0	0	12.5465	0	11.5116	0	12.067	0	0	0	0	0	0
Immunoglobulin heavy variable 1-3	IGHV1-3	0	0	0	14.1989	14.3407	0	15.4316	0	0	0	0	0	0	0	0	0	0	0	14.6994	0	11.0343	0	0	0	11.8925	0	10.3634	0	0	0	13.7689	13.6877	0	0	10.6777	0	0	14.3688	0	12.7441	0	14.3871	0	14.1842	0	0	0	0
Triple QxxK/R motif-containing protein (Triple repetitive-sequence of QXXK/R protein homolog)	TRIQK	0	9.33222	9.27972	0	0	9.52189	0	10.2041	10.3284	10.3207	9.67544	13.2474	10.377	0	9.60314	9.43812	12.6433	10.1308	7.79406	0	8.28368	9.49434	8.40915	8.68708	0	10.0673	12.4348	9.32051	12.9171	0	9.03393	0	10.3186	8.2065	13.0737	9.16391	0	0	11.4516	10.1937	0	9.22409	10.4939	8.35575	9.82508	12.2437	8.92078	9.67326
POTE ankyrin domain family member F (ANKRD26-like family C member 1B) (Chimeric POTE-actin protein)	POTEF	11.0388	0	0	0	0	0	14.2044	0	0	11.7313	0	0	0	11.7569	0	0	0	0	0	0	0	0	0	0	0	0	0	9.91037	0	0	0	0	0	0	0	0	0	0	0	0	0	12.6514	0	15.7772	11.3461	0	9.51523	0
Large ribosomal subunit protein uL5 (60S ribosomal protein L11) (CLL-associated antigen KW-12)	RPL11	11.9217	12.3527	0	0	0	0	0	12.6137	12.0023	0	10.9823	0	12.2292	0	13.6093	0	9.78986	10.689	0	0	0	0	8.30447	0	0	0	11.7086	12.496	11.2247	0	0	0	11.2778	0	0	10.843	9.02524	0	0	9.2683	0	0	11.3065	0	11.2731	11.98	11.2291	13.3866
Inter-alpha-trypsin inhibitor heavy chain H4 (ITI heavy chain H4) (ITI-HC4) (Inter-alpha-inhibitor heavy chain 4) (Inter-alpha-trypsin inhibitor family heavy chain-related protein) (IHRP) (Plasma kallikrein sensitive glycoprotein 120) (Gp120) (PK-120) [Cleaved into: 70 kDa inter-alpha-trypsin inhibitor heavy chain H4; 35 kDa inter-alpha-trypsin inhibitor heavy chain H4]	ITIH4	0	0	13.1653	11.5355	12.2183	11.4905	10.2551	0	0	0	0	14.3484	0	12.3508	0	0	0	0	0	0	0	0	0	14.2106	0	0	0	0	0	10.9966	0	12.4384	0	11.9691	11.7427	0	12.1946	11.3611	0	10.23	0	12.0414	0	10.1865	0	0	0	0
Prostaglandin D2 receptor (PGD receptor) (PGD2 receptor) (Prostanoid DP receptor)	PTGDR	0	0	0	0	0	0	0	0	0	10.8383	0	0	0	0	0	0	0	0	0	10.1635	0	0	0	0	0	0	0	0	0	0	0	0	0	0	0	0	0	0	12.2697	10.3551	10.2238	0	0	10.6379	0	0	0	0
Platelet glycoprotein Ib beta chain (GP-Ib beta) (GPIb-beta) (GPIbB) (Antigen CD42b-beta) (CD antigen CD42c)	GP1BB	0	12.352	13.2813	9.77536	12.8235	13.1712	0	0	0	8.99158	0	9.36513	0	12.883	0	0	0	0	11.8865	10.0167	0	9.01573	10.4499	11.7983	0	0	0	0	0	10.876	11.2655	11.5179	0	10.841	0	0	12.0631	10.2526	0	0	0	9.06824	0	9.90146	0	0	0	11.3623
Immunoglobulin lambda variable 3-10	IGLV3-10	0	0	12.9409	13.0422	12.3758	11.3422	12.03	0	0	0	0	13.1954	0	11.8457	0	9.38388	0	0	12.9863	9.46721	0	10.6794	0	14.4875	9.61404	0	0	0	0	10.4517	13.0031	12.814	0	11.2504	0	0	0	10.3444	9.73506	0	10.8313	11.7229	0	12.0251	0	9.71304	0	0
Thymosin beta-10	TMSB10	11.6549	11.6441	0	0	0	0	0	11.3688	10.8948	0	0	0	11.7206	0	10.8743	9.61672	11.7151	11.9407	0	0	10.7727	0	0	0	0	0	0	11.0769	11.9954	0	0	0	11.2119	0	0	11.9781	10.0182	0	0	9.12872	0	9.09017	11.4349	0	11.2514	11.8035	10.0272	10.5001
Potassium-transporting ATPase alpha chain 1 (EC 7.2.2.19) (Gastric H(+)/K(+) ATPase subunit alpha) (Proton pump)	ATP4A	0	11.875	9.82108	0	11.8264	0	0	0	10.6268	0	0	11.1616	10.7945	0	0	0	13.8989	10.3753	11.8214	0	12.0102	0	0	0	0	0	12.077	12.5115	12.0781	0	0	0	10.3944	0	0	10.9735	11.7145	0	12.645	0	12.0252	11.8535	0	0	0	0	0	10.6911
Ectonucleotide pyrophosphatase/phosphodiesterase family member 7 (E-NPP 7) (NPP-7) (EC 3.1.4.12) (Alkaline sphingomyelin phosphodiesterase) (Intestinal alkaline sphingomyelinase) (Alk-SMase)	ENPP7	0	0	0	0	11.8497	0	0	0	0	0	0	0	0	0	0	0	0	0	0	0	0	0	0	0	0	0	0	0	0	9.11914	0	0	0	0	10.1541	0	9.79124	12.2234	0	0	0	0	0	0	0	0	0	0
Serine incorporator 3 (Tumor differentially expressed protein 1)	SERINC3	0	0	0	0	10.9808	0	0	0	0	0	0	0	0	11.1496	0	0	0	0	9.80725	9.77722	0	0	10.334	0	0	11.6161	0	0	0	9.44702	10.087	0	0	0	9.88025	0	0	0	0	0	10.6734	10.3974	0	10.6189	0	0	0	0
Ribosome-recycling factor, mitochondrial (RRF) (mtRRF) (Ribosome-releasing factor, mitochondrial)	MRRF	10.0747	0	0	0	0	0	0	0	0	0	0	0	10.4527	0	0	0	0	0	0	0	0	0	0	0	0	0	0	12.3221	0	0	0	0	0	0	0	9.29582	0	0	0	9.15681	0	0	0	0	10.1687	0	0	0
Immunoglobulin heavy variable 4-28	IGHV4-28	0	0	10.9395	13.3535	0	0	12.1974	0	0	0	0	0	11.022	11.9729	0	0	0	0	14.5496	10.2009	0	0	11.8389	13.3015	0	0	0	0	0	11.2601	0	10.7578	0	11.961	10.4381	0	10.1727	13.7651	0	10.2669	0	13.1338	0	12.9873	0	0	0	0
Profilin-2 (Profilin II)	PFN2	0	9.7205	9.62034	10.6551	0	0	10.2118	11.0237	10.9851	0	0	0	0	0	11.3812	0	12.8117	12.2206	0	0	0	9.78444	0	10.5324	0	0	0	0	11.2192	0	0	0	0	0	11.2762	11.0534	0	0	10.9635	0	0	10.2273	0	0	11.0912	10.6511	0	11.3572
Collagen alpha-3(VI) chain	COL6A3	11.6745	0	12.2084	13.7847	11.2095	14.301	13.4441	8.09184	9.25091	11.8931	0	0	11.9527	0	11.8342	0	8.4189	0	12.215	10.0902	0	11.9613	15.1249	13.8424	13.1933	0	14.4865	0	0	13.5267	13.8357	13.5215	0	0	12.3888	0	11.7136	12.4013	0	13.091	13.6413	13.153	0	12.3956	0	6.89932	11.9256	0
ATP synthase subunit epsilon, mitochondrial (ATPase subunit epsilon) (ATP synthase F1 subunit epsilon)	ATP5F1E	0	11.7705	0	0	0	0	0	11.666	11.4867	0	0	0	11.6232	0	11.3256	0	0	11.7255	0	0	11.5679	0	9.42988	0	10.4852	9.85041	0	12.4218	0	0	0	0	9.93584	10.7009	0	0	0	0	0	10.1674	0	0	9.32641	0	11.6963	11.4438	0	0
Glutathione peroxidase 7 (GPx-7) (GSHPx-7) (EC 1.11.1.9) (CL683)	GPX7	0	0	0	0	0	9.11848	0	0	0	0	0	0	0	10.0607	0	0	0	9.554	0	0	0	0	0	0	0	0	0	0	0	0	8.74439	8.69782	0	10.9159	9.15211	10.4771	0	0	0	0	12.3088	0	0	0	0	9.24317	0	0
Protein MAL2	MAL2	0	0	10.6483	9.61292	12.2115	13.2783	10.2936	0	0	11.0962	0	0	0	0	0	0	12.5238	0	13.0569	13.1222	0	13.3469	0	11.1004	14.0523	9.39078	10.1849	10.7178	10.7295	12.067	10.6792	10.9924	0	0	12.5766	0	9.52585	14.3558	12.0259	17.2263	13.8528	11.1477	0	10.6271	10.783	10.8247	0	12.2726
Histone H1.3 (Histone H1c) (Histone H1s-2)	H1-3	11.7974	11.8419	10.75	11.7121	0	11.2181	0	13.7808	9.33763	10.3578	10.6254	12.1903	10.0085	11.4853	12.8313	10.4482	7.9698	13.0312	9.20035	0	12.805	0	9.11186	11.3007	0	0	10.9098	10.4797	12.4557	0	12.2745	12.4029	11.4279	0	13.0071	12.1757	9.74436	0	12.7549	0	0	12.6324	10.7468	12.4327	11.976	11.7074	11.8491	11.8916
Cytochrome c oxidase subunit 7B, mitochondrial (Cytochrome c oxidase polypeptide VIIb)	COX7B	0	10.3268	0	0	0	0	0	10.4818	10.6414	0	12.4799	0	0	9.25704	10.0228	0	12.544	0	0	0	0	9.27527	0	0	10.8316	0	0	10.0969	10.8425	0	0	0	0	0	0	0	0	0	9.7931	10.4502	0	8.99697	0	9.9504	0	11.286	9.6758	0
Transmembrane protein 258 (Dolichyl-diphosphooligosaccharide--protein glycosyltransferase subunit TMEM258) (Oligosaccharyl transferase subunit TMEM258)	TMEM258	0	0	11.253	9.08318	10.9741	0	0	0	0	0	0	9.96654	8.67585	11.1163	0	0	9.27881	10.6277	0	11.0293	13.504	9.22469	0	10.5699	11.2755	0	9.12136	9.47941	0	9.47378	10.5019	10.0218	0	0	0	10.4651	0	10.5553	0	0	0	0	0	0	9.81152	0	0	0
Immunoglobulin kappa variable 1-6	IGKV1-6	0	0	10.231	11.31	12.8644	0	10.3426	0	0	0	0	12.1234	0	10.5736	0	0	0	0	10.1985	0	0	0	10.0119	10.6907	0	0	10.5027	0	0	0	9.79776	10.6885	0	9.60291	9.61758	0	0	9.96074	0	0	0	0	0	11.4168	0	0	0	12.4073
HLA class II histocompatibility antigen, DR beta 4 chain (MHC class II antigen DRB4)	HLA-DRB4	0	0	0	10.4202	0	10.6723	0	0	0	0	0	0	0	0	0	0	0	0	0	0	9.32912	0	0	0	0	0	0	0	0	0	10.764	0	0	0	11.6326	0	0	0	10.9085	0	0	0	0	12.1012	0	0	0	0
Unconventional myosin-Ic (Myosin I beta) (MMI-beta) (MMIb)	MYO1C	0	0	10.1092	0	0	11.8772	0	0	0	12.1634	0	0	0	0	0	0	0	0	0	10.0124	0	0	11.3297	10.6107	0	0	0	0	0	8.85274	11.284	9.87461	0	0	9.00822	0	9.4225	11.0833	10.982	13.5952	0	0	0	11.325	0	0	0	0
Peroxisomal membrane protein PMP34 (34 kDa peroxisomal membrane protein) (Solute carrier family 25 member 17)	SLC25A17	0	0	0	0	0	0	0	0	0	0	0	0	0	10.3522	0	0	0	0	0	8.93044	0	0	0	0	0	0	0	0	0	0	0	0	0	0	0	0	9.14029	0	0	0	0	0	0	0	0	0	0	0
Tubulin alpha chain-like 3 (EC 3.6.5.-)	TUBAL3	0	0	0	9.374	7.92013	11.1615	9.37882	0	0	8.45905	0	9.60627	0	0	0	0	0	0	0	9.28429	0	9.59753	0	0	9.23769	9.45161	0	0	0	10.1584	9.86642	0	0	10.0283	0	0	0	9.12364	9.76402	0	9.93857	9.05667	0	9.61204	0	0	0	0
Tubulin beta-2B chain	TUBB2B	0	0	0	9.35544	0	9.31031	0	0	0	0	0	0	0	0	0	8.01322	12.9316	0	9.86548	0	10.2414	12.1489	0	11.2536	0	0	0	11.6572	0	0	9.01913	9.6944	0	0	0	0	0	0	13.5412	0	0	10.6447	0	0	0	0	0	0
HLA class II histocompatibility antigen, DR beta 3 chain (MHC class II antigen DRB3)	HLA-DRB3	0	0	0	9.68656	0	11.0628	10.0015	0	0	10.2683	0	8.25256	11.9668	8.89954	9.59926	0	0	0	0	8.56307	11.3612	0	0	10.8984	0	0	0	10.437	0	0	12.4546	0	0	0	9.71648	9.72895	7.84761	0	0	7.87823	0	11.4493	0	10.5707	0	0	9.66122	0
Etoposide-induced protein 2.4 homolog (p53-induced gene 8 protein)	EI24	0	0	9.74368	0	9.41191	0	0	9.17454	9.96646	10.2262	0	9.75865	10.4668	0	0	0	9.71439	11.0414	0	11.027	0	9.50607	9.96918	9.83411	12.402	12.6615	10.541	10.5111	9.58443	11.1966	10.203	10.1597	0	0	10.217	10.2703	9.90894	11.4694	9.57001	0	10.1858	9.41593	0	9.73983	9.83299	9.0912	0	0
Polyglutamine-binding protein 1 (PQBP-1) (38 kDa nuclear protein containing a WW domain) (Npw38) (Polyglutamine tract-binding protein 1)	PQBP1	0	0	0	0	0	0	0	0	9.9013	0	0	0	10.7075	0	11.3147	10.4513	9.05517	0	0	11.6828	12.1258	0	0	0	11.1645	10.1334	0	0	8.49052	10.6105	0	0	0	0	0	10.4654	8.52738	0	10.4723	0	10.4967	0	0	0	9.67707	8.68462	10.3934	0
Exosome complex component RRP40 (Exosome component 3) (Ribosomal RNA-processing protein 40) (p10)	EXOSC3	0	0	0	0	0	0	0	0	0	9.66759	0	0	0	0	0	0	0	9.41852	0	0	0	9.61378	0	0	10.7954	0	9.04707	11.0546	8.87061	8.74356	0	0	0	0	8.45445	9.58171	9.03369	0	0	0	0	0	9.84824	0	0	0	0	0
Adenylate kinase isoenzyme 5 (AK 5) (EC 2.7.4.3) (EC 2.7.4.6) (ATP-AMP transphosphorylase 5)	AK5	0	0	9.52153	10.752	0	12.3335	10.6211	0	0	0	0	0	0	0	0	11.9012	11.4798	0	0	0	13.492	10.6411	0	9.95226	0	10.6706	0	9.41993	0	10.6673	0	0	0	0	10.5733	0	0	0	11.3333	10.3217	0	0	0	0	0	0	0	0
C-type lectin domain family 2 member B (Activation-induced C-type lectin) (C-type lectin superfamily member 2) (IFN-alpha-2b-inducing-related protein 1)	CLEC2B	0	0	0	0	0	0	0	0	0	0	0	0	0	8.76057	0	0	0	0	0	0	0	0	0	0	0	0	0	0	0	0	0	0	0	0	10.1526	10.0524	0	0	0	0	0	10.985	0	0	10.9018	0	10.6985	0
WD repeat-containing protein 86	WDR86	0	0	0	0	0	0	0	0	0	0	0	0	0	0	0	0	0	0	0	0	0	0	0	0	0	0	0	0	0	0	0	0	0	0	0	0	9.28688	0	0	7.65972	0	0	8.81269	0	0	0	0	0
Deoxyribonuclease TATDN1 (EC 3.1.21.-) (Hepatocarcinoma high expression protein)	TATDN1	0	10.0246	0	0	0	0	9.92464	10.957	11.7587	0	0	0	9.62954	0	10.3437	7.74513	7.88083	9.15412	0	0	0	0	0	0	0	0	9.41133	9.55102	9.21325	0	0	8.70123	9.33714	8.91933	0	8.16995	0	0	0	0	10.3255	0	8.46884	0	9.28777	10.4464	7.74049	0
Tubulin-specific chaperone C (Tubulin-folding cofactor C) (CFC)	TBCC	0	9.89453	0	0	0	0	0	11.5348	11.4169	0	0	0	11.0055	0	10.4692	0	10.8442	10.4235	0	9.85523	12.8212	0	0	0	9.14877	10.9913	0	10.4166	9.99756	0	9.39036	9.59186	0	0	10.265	0	9.71451	9.94265	0	0	9.69652	9.96997	9.35634	9.18652	0	0	0	0
Calmodulin-regulated spectrin-associated protein 1	CAMSAP1	0	0	0	0	0	0	0	0	0	0	0	8.75534	0	0	8.25564	10.5873	10.0139	0	0	0	0	0	0	0	10.0699	0	0	9.63349	0	0	0	0	0	0	0	0	0	0	0	0	0	10.0957	0	9.60456	0	0	0	10.464
Alpha-S2-casein [Cleaved into: Casocidin-1 (Casocidin-I)]	CSN1S2	0	0	9.66256	9.83456	9.00496	11.3816	9.00907	0	0	9.8031	12.344	9.24556	0	10.21	7.56632	13.8412	0	0	0	9.75458	14.5709	9.18323	0	9.62973	8.96481	10.3408	8.88929	7.91215	0	8.8557	11.2084	8.96122	9.68726	0	7.40772	0	0	10.4375	9.58499	11.5782	10.8559	10.6625	12.8309	7.52821	0	0	0	7.45509
Claudin domain-containing protein 1 (Membrane protein GENX-3745)	CLDND1	0	0	0	0	10.496	12.5885	10.1489	0	0	10.7386	0	0	0	0	0	0	0	0	13.0857	10.1128	0	10.4965	9.60527	0	11.5728	10.9917	0	0	0	0	0	9.46903	0	0	10.2976	0	9.94987	11.2376	10.5697	0	0	10.2445	0	10.3124	0	0	0	0
Inactive carboxypeptidase-like protein X2	CPXM2	0	0	10.3605	11.0475	9.46699	11.8027	12.1627	0	0	12.0714	0	0	0	0	0	0	0	0	10.5279	0	0	9.78063	0	11.3956	9.05163	0	0	0	0	10.0853	10.9123	10.1061	0	10.4413	9.19017	0	0	10.1898	10.3131	0	0	9.76943	0	11.2246	0	0	0	0
ADP-ribosylation factor-like protein 6-interacting protein 6 (ARL-6-interacting protein 6) (Aip-6) (Phosphonoformate immuno-associated protein 1)	ARL6IP6	0	0	0	0	10.5987	11.4074	11.0187	0	0	11.2685	0	10.344	0	0	0	0	0	0	0	9.65957	10.8262	10.6793	11.6615	0	10.9668	11.6998	0	0	0	10.2534	10.6709	0	0	0	9.22048	0	0	11.1712	11.107	12.2279	0	10.5283	0	9.80867	0	0	0	0
Leukocyte surface antigen CD53 (Cell surface glycoprotein CD53) (Tetraspanin-25) (Tspan-25) (CD antigen CD53)	CD53	0	0	11.2372	10.3445	11.686	12.3414	0	0	0	11.8825	0	9.68936	0	0	0	0	8.73798	0	0	0	10.0141	0	0	10.7777	11.0808	9.75844	0	0	0	10.5124	10.4015	0	0	0	0	0	0	10.5861	10.7859	10.5931	0	11.7949	0	10.4153	0	0	0	10.5994
Transcription factor BTF3 (Nascent polypeptide-associated complex subunit beta) (NAC-beta) (RNA polymerase B transcription factor 3)	BTF3	0	0	0	0	0	0	0	11.7086	11.8551	0	0	0	0	0	11.8463	0	9.21657	8.55514	0	0	0	0	0	0	0	0	0	10.6143	10.0129	0	0	0	9.19928	0	0	10.1851	0	0	0	10.113	9.75414	0	10.3552	0	9.05288	10.362	10.9665	0
Large subunit GTPase 1 homolog (hLsg1) (EC 3.6.1.-)	LSG1	0	0	0	0	0	9.57305	0	0	0	0	0	0	0	0	0	0	0	0	0	0	10.0365	0	0	0	0	0	0	0	0	0	0	0	0	0	0	0	0	0	0	0	0	0	0	0	0	0	0	0
Immunoglobulin lambda variable 1-51 (Ig lambda chain V-I region BL2) (Ig lambda chain V-I region EPS) (Ig lambda chain V-I region NEW) (Ig lambda chain V-I region NIG-64)	IGLV1-51	0	0	13.6926	15.3781	14.024	13.3495	13.1294	10.9448	0	0	10.8001	15.0569	11.1677	13.0058	11.5781	0	10.58	11.684	14.4794	12.6839	0	0	0	14.4523	12.0071	0	0	11.7579	10.4304	11.2106	13.8056	13.0828	0	12.1187	13.0612	0	0	12.7342	11.1072	9.85121	0	14.1285	12.0907	14.7309	0	0	0	0
Ras-related protein Rab-6D (Rab6-like protein WTH3DI)	RAB6D	9.575	0	0	0	10.9251	0	0	0	11.7751	0	10.704	0	10.5605	10.6163	0	9.98212	0	10.2891	0	0	9.10695	0	0	0	0	0	0	12.331	10.3155	10.7517	0	0	10.6209	0	0	0	9.44378	0	0	0	11.3622	0	10.8801	0	10.6866	9.74085	0	0
CREB-binding protein (Histone lysine acetyltransferase CREBBP) (EC 2.3.1.48) (Protein-lysine acetyltransferase CREBBP) (EC 2.3.1.-)	CREBBP	0	0	0	0	0	0	0	12.2219	12.4498	0	0	0	0	0	0	0	0	11.4276	0	0	0	0	9.09943	10.1866	0	0	0	0	9.56276	0	0	0	10.6105	0	0	0	8.59469	0	0	8.71425	0	0	10.2795	0	9.58503	9.41226	0	0
NADH dehydrogenase [ubiquinone] 1 alpha subcomplex subunit 4-like 2 (NADH-ubiquinone oxidoreductase MLRQ subunit homolog) (NUOMS)	NDUFA4L2	9.93188	12.2036	0	0	0	0	0	10.5262	10.33	0	10.6116	0	10.3818	0	0	0	0	8.54728	0	10.454	10.8881	9.2178	0	0	0	8.74153	0	9.71884	8.93695	0	0	0	10.6369	0	0	11.7823	9.94653	0	0	8.63606	0	0	12.247	0	0	0	8.55565	9.24755
Peroxisomal carnitine O-octanoyltransferase (COT) (EC 2.3.1.137)	CROT	0	0	0	0	0	0	0	0	0	0	0	0	0	0	0	0	0	0	0	0	0	0	0	0	0	0	0	0	0	9.16418	0	0	0	0	0	0	0	0	0	0	0	11.7008	0	0	0	0	0	0
WD repeat-containing protein 54	WDR54	0	14.2012	0	0	0	9.18303	0	12.9957	0	0	0	0	0	0	0	0	0	10.4795	0	9.83104	0	9.90045	0	9.44571	0	0	8.42399	0	12.7843	10.4631	8.67027	0	12.755	0	0	0	8.6942	10.3848	10.0714	0	10.7375	10.5906	0	11.9563	0	0	0	0
Presenilin-associated rhomboid-like protein, mitochondrial (EC 3.4.21.105) (Mitochondrial intramembrane cleaving protease PARL) [Cleaved into: P-beta (Pbeta)]	PARL	0	0	0	0	0	0	0	0	0	0	0	0	0	0	0	0	0	0	0	0	0	0	0	0	0	0	8.70792	0	0	8.99909	0	0	0	9.62308	0	0	0	0	0	0	0	0	0	11.2817	0	9.10324	0	0
Putative heat shock protein HSP 90-beta 4	HSP90AB4P	0	0	0	8.15673	9.60383	12.5073	9.37415	0	0	9.49938	0	10.1263	0	0	0	0	0	0	0	8.71041	0	9.58744	0	0	0	10.8378	0	0	0	9.46993	10.1874	0	0	0	10.6849	0	0	10.2644	9.8704	0	0	9.54291	0	10.649	0	0	0	0
DENN domain-containing protein 3	DENND3	0	0	0	0	0	0	0	0	0	0	0	0	0	0	0	0	0	0	7.87742	0	0	11.0149	8.72659	0	0	0	0	0	0	0	0	8.77314	0	9.75878	0	10.0379	0	0	0	0	0	11.1284	0	11.7557	10.0574	0	9.02317	0
Immunoglobulin heavy variable 3-15	IGHV3-15	0	0	10.3878	12.0859	11.6856	12.2728	11.9632	0	0	0	0	10.5668	0	10.9228	0	0	0	0	11.956	9.07314	0	10.8769	11.5168	12.2469	0	0	0	0	0	10.8536	11.3351	11.3774	0	11.1154	9.81505	0	0	9.84488	0	10.0948	9.9925	10.9135	0	13.2289	0	0	9.26612	9.9951
Syntaxin-binding protein 5 (Lethal(2) giant larvae protein homolog 3) (Tomosyn-1)	STXBP5	0	0	0	0	0	0	10.6243	0	0	0	0	0	0	10.6324	0	0	10.5493	0	0	0	0	0	0	0	10.1465	8.72959	0	0	0	0	0	13.4127	0	10.3919	0	11.7609	9.71192	0	0	0	9.81513	0	0	0	0	0	0	0
Keratin, type II cytoskeletal 4 (Cytokeratin-4) (CK-4) (Keratin-4) (K4) (Type-II keratin Kb4)	KRT4	14.6797	9.57207	0	10.182	7.02369	0	8.83512	9.63977	0	9.48592	11.6587	10.7911	9.94417	0	11.4313	12.3035	13.9639	10.934	0	0	9.60631	11.6328	8.92119	0	7.44737	7.79598	13.3472	12.0596	9.7751	0	0	0	0	8.67614	10.4146	0	8.45257	10.4736	8.72159	0	7.69447	8.63591	14.5738	9.02345	11.8908	9.86935	14.0982	11.2198
Integrin alpha-X (CD11 antigen-like family member C) (Leu M5) (Leukocyte adhesion glycoprotein p150,95 alpha chain) (Leukocyte adhesion receptor p150,95) (CD antigen CD11c)	ITGAX	0	0	0	8.98713	0	0	0	0	0	0	0	0	0	0	0	9.95938	0	0	9.18978	0	8.63849	0	0	0	0	0	0	0	0	0	9.4641	10.3395	10.3391	0	10.5337	0	0	0	0	8.80874	0	11.4889	0	0	0	0	0	0
Immunoglobulin heavy constant delta (Ig delta chain C region) (Ig delta chain C region NIG-65) (Ig delta chain C region WAH)	IGHD	0	0	11.5508	11.1517	11.3403	12.614	13.3724	0	0	0	0	8.02318	0	11.1214	0	0	0	0	0	0	0	0	11.4414	10.0558	0	0	8.54826	0	0	9.56819	0	11.9868	0	11.4358	8.64598	0	10.0542	0	0	0	0	0	0	11.6843	0	0	0	0
Uronyl 2-sulfotransferase (EC 2.8.2.-)	UST	0	0	0	0	0	0	0	0	0	0	0	0	0	0	0	0	0	0	0	0	0	0	9.72327	0	11.6572	0	0	0	0	0	0	0	0	0	0	0	0	12.1578	0	0	0	0	0	0	0	0	0	10.0858
Rho GTPase-activating protein 31 (Cdc42 GTPase-activating protein)	ARHGAP31	0	0	0	0	0	0	0	0	0	0	0	0	0	0	0	0	0	0	0	0	0	0	0	0	0	0	0	0	0	0	0	0	0	0	0	0	0	0	0	0	0	0	8.46637	0	8.52751	0	0	0
Methyltransferase N6AMT1 (HemK methyltransferase family member 2) (M.HsaHemK2P) (Lysine N-methyltransferase 9) (EC 2.1.1.-) (Methylarsonite methyltransferase N6AMT1) (EC 2.1.1.-) (Protein N(5)-glutamine methyltransferase) (EC 2.1.1.-)	N6AMT1	0	0	0	0	0	0	0	0	0	0	0	0	0	0	0	0	0	0	0	0	0	0	0	0	0	0	0	0	0	0	0	0	0	0	0	0	0	0	0	0	0	0	0	0	0	0	0	0
N-acylglucosamine 2-epimerase (AGE) (EC 5.1.3.8) (GlcNAc 2-epimerase) (N-acetyl-D-glucosamine 2-epimerase) (Renin-binding protein) (RnBP)	RENBP	0	0	9.02512	0	0	0	0	0	0	0	0	0	0	0	0	0	0	0	0	0	0	0	10.2872	9.83023	0	0	0	0	0	8.89382	0	9.58355	0	0	0	0	10.0557	11.9206	0	9.58526	11.2655	0	0	0	0	0	0	0
Sarcospan (K-ras oncogene-associated protein) (Kirsten-ras-associated protein)	SSPN	0	0	8.768	0	10.1126	8.71776	11.1938	0	9.72941	0	0	0	10.166	0	0	0	0	0	9.42086	0	0	9.18489	9.59978	9.65334	0	0	0	0	0	10.1789	9.84925	0	9.99006	0	0	0	8.95259	0	0	9.09776	10.3593	10.3759	10.6752	9.94641	0	0	0	0
Reticulon-4 (Foocen) (Neurite outgrowth inhibitor) (Nogo protein) (Neuroendocrine-specific protein) (NSP) (Neuroendocrine-specific protein C homolog) (RTN-x) (Reticulon-5)	RTN4	0	9.55246	0	10.5306	0	9.67814	7.80094	0	0	8.07112	0	8.7832	0	11.4154	9.44449	0	11.9346	0	0	10.3319	0	0	0	0	0	0	0	8.74994	0	0	0	10.3396	0	12.224	9.38555	0	0	9.8598	0	0	0	9.35414	0	10.2573	0	9.01473	0	0
Cadherin-2 (CDw325) (Neural cadherin) (N-cadherin) (CD antigen CD325)	CDH2	10.9914	0	0	0	9.46524	12.3519	9.42147	0	0	0	9.37231	0	0	10.039	0	11.0098	12.615	0	0	8.91998	0	0	0	0	0	0	0	10.2943	0	10.5207	0	0	0	0	11.3704	0	0	0	9.54526	10.4541	9.07292	11.916	0	0	0	0	0	0
Inositol-3-phosphate synthase 1 (IPS 1) (EC 5.5.1.4) (Myo-inositol 1-phosphate synthase) (MI-1-P synthase) (MIP synthase) (hIPS) (Myo-inositol 1-phosphate synthase A1) (hINO1)	ISYNA1	9.22163	10.7924	8.75042	0	0	0	0	10.9057	10.8325	0	8.50017	0	11.4447	0	11.9877	8.98137	0	0	0	0	13.0302	0	0	0	0	0	0	11.6887	9.05967	0	0	0	8.54873	0	0	10.5633	0	0	0	0	0	0	9.83059	0	9.25309	9.12643	9.7562	0
Platelet glycoprotein Ib alpha chain (GP-Ib alpha) (GPIb-alpha) (GPIbA) (Glycoprotein Ibalpha) (Antigen CD42b-alpha) (CD antigen CD42b) [Cleaved into: Glycocalicin]	GP1BA	0	0	9.58102	11.2367	12.6213	13.4562	9.65422	0	0	8.88681	0	10.2212	0	12.2878	0	0	0	0	11.1365	9.83898	0	10.848	10.2929	10.7295	0	0	0	0	0	9.11966	11.2574	11.3093	0	10.7068	8.13472	0	10.021	8.7633	0	0	0	11.5005	0	11.3227	0	0	0	10.8165
Caspase recruitment domain-containing protein 16 (Caspase recruitment domain-only protein 1) (CARD-only protein 1) (Caspase-1 inhibitor COP) (Pseudo interleukin-1 beta converting enzyme) (Pseudo-ICE) (Pseudo-IL1B-converting enzyme)	CARD16	0	0	0	0	0	0	0	0	7.84491	0	0	0	0	8.23573	0	0	0	0	0	0	0	0	0	0	0	0	9.52484	0	8.48468	0	0	0	8.65156	0	0	0	0	0	0	9.693	10.168	8.85549	8.74096	0	0	0	9.91202	0
Trafficking protein particle complex subunit 13	TRAPPC13	0	0	0	0	0	0	9.81865	0	0	0	0	0	0	0	0	0	0	0	0	10.2783	0	0	0	0	0	0	0	0	0	0	0	0	0	0	0	0	0	10.1368	0	11.9465	10.5289	10.5517	0	0	0	0	0	0
CKLF-like MARVEL transmembrane domain-containing protein 3 (Chemokine-like factor superfamily member 3)	CMTM3	0	0	10.6522	9.59984	10.2769	15.0132	10.5326	0	0	11.309	0	9.40933	0	8.04113	0	0	0	0	13.4009	0	0	0	10.4395	9.51336	0	9.32117	0	0	0	11.0167	0	10.3076	0	0	11.2845	0	0	11.4882	8.69628	11.3269	10.8067	9.9668	0	9.31126	0	0	0	0
Nuclear cap-binding protein subunit 2 (20 kDa nuclear cap-binding protein) (Cell proliferation-inducing gene 55 protein) (NCBP 20 kDa subunit) (CBP20) (NCBP-interacting protein 1) (NIP1)	NCBP2	0	10.8503	0	0	0	0	0	8.76808	9.62404	0	0	0	0	9.82889	0	0	0	0	0	8.6512	10.3292	9.3586	0	0	10.5312	9.7817	0	0	0	0	0	0	8.94131	0	0	10.5894	0	0	0	10.5398	0	0	8.77981	8.56548	10.1498	0	11.2202	9.4166
Stromal membrane-associated protein 2 (Stromal membrane-associated protein 1-like)	SMAP2	0	0	0	9.04237	0	0	0	0	10.5823	0	8.95173	0	11.4684	0	10.7427	9.59001	10.7866	9.44061	7.36352	0	0	0	0	0	9.60106	0	11.3344	10.963	10.079	0	0	0	9.50992	0	0	9.09492	0	0	0	7.50726	0	0	10.1292	0	10.1813	10.2618	9.84408	10.1643
Platelet glycoprotein IX (GP-IX) (GPIX) (Glycoprotein 9) (CD antigen CD42a)	GP9	0	0	9.60749	9.32343	0	0	0	0	0	0	10.0741	0	0	0	0	0	9.83295	0	11.6407	10.0945	0	9.66136	8.77654	10.9331	0	0	0	0	0	0	9.33927	0	0	9.25513	0	0	11.0755	0	0	8.28229	0	10.9549	0	10.9432	0	8.58247	0	0
ELAV-like protein 4 (Hu-antigen D) (HuD) (Paraneoplastic encephalomyelitis antigen HuD)	ELAVL4	0	9.81931	0	0	10.4307	0	0	0	9.90225	0	0	9.61847	9.75831	8.83769	10.086	13.9242	9.95005	9.55022	0	11.4285	11.9025	0	0	10.6559	0	0	9.4892	9.19041	9.42136	10.5821	0	0	11.0097	0	0	0	8.64671	0	0	0	0	0	10.6554	0	9.8243	9.55011	11.5567	0
Centromere protein V (CENP-V) (Nuclear protein p30) (Proline-rich protein 6)	CENPV	0	11.076	0	0	0	0	0	13.0995	11.4288	0	0	0	12.2817	0	11.5747	0	0	11.3127	0	0	0	0	0	0	0	0	10.0364	12.3837	12.202	0	0	0	8.98647	0	0	10.6963	0	0	0	9.48177	0	0	10.2044	0	0	11.3832	9.15556	0
Ryanodine receptor 2 (RYR-2) (RyR2) (hRYR-2) (Cardiac muscle ryanodine receptor) (Cardiac muscle ryanodine receptor-calcium release channel) (Type 2 ryanodine receptor)	RYR2	0	0	0	0	0	0	0	0	0	0	0	0	0	0	8.96946	0	10.0536	0	0	0	0	0	0	0	0	0	0	10.3043	0	0	0	0	0	9.40658	11.6457	0	0	0	8.74101	0	10.427	0	0	0	0	9.06145	0	0
Glutaminyl-peptide cyclotransferase-like protein (EC 2.3.2.5) (Golgi-resident glutaminyl-peptide cyclotransferase) (isoQC) (gQC)	QPCTL	0	0	0	0	0	0	0	0	0	0	0	0	0	0	0	0	0	0	0	0	0	0	0	0	0	0	0	0	0	0	0	0	0	0	0	0	9.52458	0	0	0	0	0	0	0	0	0	0	0
Poly(A) RNA polymerase, mitochondrial (PAP) (EC 2.7.7.19) (PAP-associated domain-containing protein 1) (Polynucleotide adenylyltransferase) (Terminal uridylyltransferase 1) (TUTase 1) (mtPAP)	MTPAP	0	0	0	0	0	0	0	0	0	0	9.89973	0	0	0	0	9.19104	0	0	0	0	0	0	0	0	0	0	0	0	0	0	0	0	0	0	8.03989	0	0	0	10.5336	0	0	9.64203	0	0	0	10.4412	8.925	0
Lymphocyte cytosolic protein 2 (SH2 domain-containing leukocyte protein of 76 kDa) (SLP-76 tyrosine phosphoprotein) (SLP76)	LCP2	0	0	0	0	9.89233	9.61777	0	0	0	0	0	10.4356	9.3021	0	0	0	0	0	0	0	0	0	0	9.62258	10.1739	8.20482	0	0	0	9.77676	0	0	0	0	10.5483	0	0	10.9927	9.24587	0	0	0	0	0	0	0	0	9.14822
Molybdate-anion transporter (Major facilitator superfamily domain-containing protein 5) (Molybdate transporter 2 homolog) (hsMOT2)	MFSD5	0	0	0	0	0	0	0	0	0	0	0	0	0	0	0	0	0	0	0	0	0	0	0	0	0	11.5901	0	0	0	0	0	0	0	0	8.24669	0	0	0	0	0	0	0	0	10.1477	0	0	0	0
Platelet basic protein (PBP) (C-X-C motif chemokine 7) (Leukocyte-derived growth factor) (LDGF) (Macrophage-derived growth factor) (MDGF) (Small-inducible cytokine B7) [Cleaved into: Connective tissue-activating peptide III (CTAP-III) (LA-PF4) (Low-affinity platelet factor IV); TC-2; Connective tissue-activating peptide III(1-81) (CTAP-III(1-81)); Beta-thromboglobulin (Beta-TG); Neutrophil-activa…	PPBP	0	12.6382	10.0156	11.4077	11.8558	0	0	0	0	8.47558	10.0204	9.90667	0	13.76	9.95118	11.1066	9.85158	9.70047	10.1751	10.8201	0	8.91032	9.91591	10.1801	0	0	0	10.4815	0	10.1626	9.7884	9.30161	0	8.24776	0	8.52674	10.8054	7.72601	0	9.65852	0	9.56397	0	9.23066	8.91818	10.4165	8.58063	0
Small ribosomal subunit protein bS1m (28S ribosomal protein S28, mitochondrial) (MRP-S28) (S28mt) (28S ribosomal protein S35, mitochondrial) (MRP-S35) (S35mt)	MRPS28	0	0	0	0	0	0	0	0	0	0	0	0	0	0	0	0	0	0	0	0	0	0	0	0	0	0	0	0	0	0	0	0	0	0	0	8.22793	0	0	0	0	0	0	0	0	0	0	0	0
Translation machinery-associated protein 7 (Coiled-coil domain-containing protein 72)	TMA7	0	11.7906	0	0	0	0	0	11.9512	11.9652	0	0	0	11.7822	0	12.4203	9.65628	11.2918	10.3874	0	9.88121	10.1926	0	0	0	8.83055	8.85332	0	12.2275	0	0	0	0	9.17728	0	0	0	0	0	0	8.53222	0	0	10.6665	0	10.5503	9.02866	11.2101	0
Serum amyloid A-4 protein (Constitutively expressed serum amyloid A protein) (C-SAA)	SAA4	0	11.3381	12.5673	11.6795	12.2035	11.7173	0	0	0	0	0	12.2111	0	12.7758	0	0	10.3779	0	12.9378	9.31073	0	10.6679	10.9083	11.3477	0	0	0	11.8606	0	11.3961	11.6841	12.032	0	0	10.7467	0	0	0	0	0	0	10.0992	0	11.6543	0	9.71455	0	0
Transmembrane protein 19	TMEM19	0	10.5659	0	0	0	0	0	0	0	0	0	0	10.5908	0	0	0	9.38943	0	0	0	0	0	0	0	10.7879	0	0	11.2747	9.17856	0	0	0	0	0	0	0	0	0	0	0	0	0	0	0	0	9.12169	0	0
Scavenger receptor class B member 1 (SRB1) (CD36 and LIMPII analogous 1) (CLA-1) (CD36 antigen-like 1) (Collagen type I receptor, thrombospondin receptor-like 1) (SR-BI) (CD antigen CD36)	SCARB1	0	0	0	0	0	0	0	0	0	0	0	0	0	9.3875	0	0	0	0	9.69414	10.7839	0	0	9.33061	0	0	9.07445	0	0	0	0	0	0	0	0	0	0	9.69624	0	9.53275	0	0	10.01	0	0	10.5311	0	0	0
Putative HLA class I histocompatibility antigen, alpha chain H (HLA-12.4) (HLA-AR) (MHC class I antigen H)	HLA-H	0	0	0	0	0	0	11.523	0	0	11.0735	0	0	0	0	0	0	0	0	0	0	0	10.6173	9.24213	7.68575	0	0	8.6064	0	0	0	7.11742	0	0	0	0	0	0	9.75324	12.0571	0	0	11.4222	0	0	8.74563	0	0	0
Histone H2A type 1-B/E (Histone H2A.2) (Histone H2A/a) (Histone H2A/m)	H2AC4	9.54587	10.5462	8.13155	0	0	0	7.82386	9.9802	10.2413	9.37319	9.51973	0	9.86847	10.3115	10.4847	8.49815	9.07152	10.5514	0	0	10.4714	0	0	0	7.89831	0	10.39	10.0443	9.34805	0	0	5.87005	10.1417	0	0	9.24362	0	0	0	0	0	0	10.5198	0	10.4956	11.0803	10.9424	12.1241
Complement factor D (EC 3.4.21.46) (Adipsin) (C3 convertase activator) (Properdin factor D)	CFD	0	0	0	0	0	0	9.48184	0	0	0	9.09986	0	0	11.0352	0	0	0	0	9.63807	0	0	0	11.6101	10.0838	0	0	0	0	0	0	0	10.4652	0	8.98303	0	0	10.2612	0	0	0	0	0	9.26015	0	0	11.47	0	10.3508
Cartilage oligomeric matrix protein (COMP) (Thrombospondin-5) (TSP5)	COMP	0	0	8.55171	11.0355	9.39442	10.1042	8.46663	0	0	6.8426	9.41973	8.73868	0	0	10.5447	0	0	0	10.8587	0	0	9.4673	12.214	10.9134	8.96528	9.76049	0	0	0	8.29422	9.40327	9.98291	0	12.0722	9.22674	0	0	0	10.0666	0	0	10.524	0	9.23839	0	0	0	7.61192
Ketimine reductase mu-crystallin (EC 1.5.1.25) (NADP-regulated thyroid-hormone-binding protein)	CRYM	0	0	0	10.3944	0	9.66371	0	0	0	0	0	0	0	0	0	12.8689	13.0078	0	10.0023	0	0	9.93082	0	10.4099	0	0	0	10.9722	0	0	0	0	0	9.26205	0	0	0	9.85877	0	0	0	10.5636	0	10.4352	0	0	0	0
Immunoglobulin lambda variable 2-18	IGLV2-18	0	0	9.54407	10.0408	10.241	11.6945	12.5094	0	0	0	0	10.9201	0	10.3045	0	0	0	0	11.7529	7.56728	0	9.49874	10.686	10.789	0	0	0	0	0	9.60288	10.4065	10.2895	0	10.2097	9.59133	0	0	0	0	0	9.74901	0	0	11.6136	0	0	0	0
Arsenite methyltransferase (EC 2.1.1.137) (Methylarsonite methyltransferase) (S-adenosyl-L-methionine:arsenic(III) methyltransferase)	AS3MT	0	0	0	0	0	0	0	0	0	0	0	0	0	0	0	0	0	0	0	0	0	10.9649	8.09977	0	0	0	0	0	0	0	8.5946	0	0	0	0	0	0	0	0	0	0	0	0	0	0	0	0	0
Caspase-4 (CASP-4) (EC 3.4.22.57) (ICE and Ced-3 homolog 2) (ICH-2) (ICE(rel)-II) (Mih1) (Protease TX) [Cleaved into: Caspase-4 subunit p10; Caspase-4 subunit p20]	CASP4	9.65586	0	0	0	0	0	0	0	0	0	10.2368	0	0	0	0	10.4916	0	10.3238	0	0	0	0	0	0	0	0	10.1049	0	0	0	0	0	0	0	0	10.2979	0	0	0	0	0	0	0	0	0	10.3452	0	0
ADP-ribosylation factor-like protein 6-interacting protein 1 (ARL-6-interacting protein 1) (Aip-1) (Apoptotic regulator in the membrane of the endoplasmic reticulum)	ARL6IP1	9.91722	0	0	0	10.0855	0	9.80781	0	0	0	0	0	0	9.90951	0	0	10.9872	0	8.56611	0	0	0	10.5221	10.3272	10.8733	9.66641	0	0	0	0	0	9.98067	0	0	0	0	0	10.9269	9.68141	0	0	0	0	9.82948	10.5073	0	0	0
1-phosphatidylinositol 4,5-bisphosphate phosphodiesterase beta-2 (EC 3.1.4.11) (Phosphoinositide phospholipase C-beta-2) (Phospholipase C-beta-2) (PLC-beta-2)	PLCB2	0	0	0	0	0	0	0	0	0	0	0	0	11.6918	0	0	0	0	0	0	0	0	0	0	0	0	0	0	0	0	0	0	0	0	0	9.12	0	0	0	0	0	0	0	0	0	0	0	0	0
P-selectin glycoprotein ligand 1 (PSGL-1) (Selectin P ligand) (CD antigen CD162)	SELPLG	0	0	0	0	0	0	0	0	0	10.0237	0	0	0	9.56885	0	0	0	0	0	0	0	0	0	0	0	0	0	0	0	0	0	0	0	0	0	0	0	8.9589	0	9.82587	8.78883	9.70719	0	0	0	0	0	9.16886
Large ribosomal subunit protein mL62 (39S ribosomal protein L58, mitochondrial) (MRP-L58) (Digestion substraction 1) (DS-1) (Immature colon carcinoma transcript 1 protein) (Peptidyl-tRNA hydrolase ICT1, mitochondrial) (EC 3.1.1.29)	MRPL58	0	0	0	0	0	0	0	10.7635	0	10.4047	0	0	0	0	0	0	0	9.55314	0	0	12.5598	9.54237	0	0	10.4161	10.1031	0	10.1822	0	8.64316	0	0	9.71688	0	8.56719	0	0	8.99551	10.3065	10.8355	9.52187	9.55581	9.61806	0	0	0	0	0
MICOS complex subunit MIC26 (Apolipoprotein O) (MICOS complex subunit MIC23) (Protein FAM121B)	APOO	0	0	0	0	0	0	0	0	0	0	0	0	0	0	0	0	0	0	0	0	0	0	0	0	0	0	0	0	0	0	0	0	8.52127	0	0	9.73296	0	0	0	0	0	0	0	0	9.35686	11.6942	0	0
Natural resistance-associated macrophage protein 2 (NRAMP 2) (Divalent cation transporter 1) (Divalent metal transporter 1) (DMT-1) (Solute carrier family 11 member 2)	SLC11A2	0	0	0	0	0	0	0	0	0	0	0	0	0	0	0	0	0	0	0	0	0	0	0	0	0	0	0	0	0	0	0	0	0	0	0	0	0	12.1807	0	0	0	0	0	0	0	0	0	12.4063
Ras-related protein Rab-27A (Rab-27) (EC 3.6.5.2) (GTP-binding protein Ram)	RAB27A	0	8.35064	0	8.70286	10.252	12.9272	0	0	0	0	11.3855	0	0	10.7799	0	11.8921	10.0765	10.2584	0	9.72155	0	9.01713	0	0	9.38975	9.50168	0	0	0	9.26461	9.81006	0	0	0	9.42024	0	0	8.74401	8.49161	11.069	0	0	0	8.54914	0	0	0	8.91025
Ubiquitin carboxyl-terminal hydrolase 19 (EC 3.4.19.12) (Deubiquitinating enzyme 19) (Ubiquitin thioesterase 19) (Ubiquitin-specific-processing protease 19) (Zinc finger MYND domain-containing protein 9)	USP19	0	0	0	0	0	0	0	0	0	0	7.75851	0	0	10.6485	0	0	0	0	0	0	0	0	0	0	0	0	0	10.4719	0	0	0	0	0	9.41302	8.91491	0	0	0	0	0	0	11.6682	0	0	0	0	7.94604	10.7372
Somatostatin receptor type 2 (SS-2-R) (SS2-R) (SS2R) (SST2) (SRIF-1)	SSTR2	0	10.16	0	0	8.12304	0	0	0	0	10.1963	0	9.69145	0	0	0	0	0	0	0	0	0	9.2453	0	0	0	0	0	11.0066	0	7.35106	0	0	0	0	8.65812	0	9.55371	0	10.9596	0	0	9.84622	0	0	0	7.94362	10.1705	0
Low affinity immunoglobulin gamma Fc region receptor II-a (IgG Fc receptor II-a) (CDw32) (Fc-gamma RII-a) (Fc-gamma-RIIa) (FcRII-a) (CD antigen CD32)	FCGR2A	11.5123	0	10.7787	9.81691	11.2178	10.8484	11.0666	0	0	11.2988	0	0	10.9003	9.75991	0	0	0	10.4024	0	0	11.0686	10.8477	11.71	11.0661	11.413	0	9.45549	0	9.26004	11.2724	0	0	0	0	10.4676	10.9124	9.73193	11.858	10.9506	11.4464	0	11.4764	11.3564	10.9758	9.82282	9.57131	0	12.2776
5'-3' exoribonuclease 1 (EC 3.1.13.-) (Strand-exchange protein 1 homolog)	XRN1	0	0	0	0	0	0	0	0	0	0	0	0	0	0	0	0	0	0	8.28631	0	0	9.45787	0	0	0	10.1467	0	0	0	7.75535	0	0	0	9.44911	8.09712	0	0	9.23063	0	0	9.23657	0	0	8.98685	0	0	0	0
Stathmin-2 (Superior cervical ganglion-10 protein) (Protein SCG10)	STMN2	9.44526	10.9559	0	0	0	0	0	0	9.96933	0	0	0	10.2951	0	9.1599	9.60778	14.4102	11.1692	0	0	8.90905	0	0	0	9.21337	0	10.5818	10.0633	9.98681	0	0	0	9.54592	0	0	9.05138	0	0	0	6.32551	8.53377	0	9.49037	0	10.3856	12.6702	8.76742	8.47957
Protein YIPF4 (YIP1 family member 4)	YIPF4	0	0	8.89046	0	0	0	0	0	0	9.82458	0	8.46477	0	0	0	0	0	0	0	9.93029	11.427	8.79979	0	0	10.2892	9.46631	0	0	0	9.74117	0	0	0	0	9.39515	0	0	10.584	9.5553	0	0	9.5074	0	9.46256	0	0	0	0
Olfactomedin-like protein 2A (Photomedin-1)	OLFML2A	0	0	0	0	0	0	0	0	0	9.61469	0	0	9.56527	0	0	0	0	0	0	0	0	10.2156	0	0	0	0	0	0	0	0	0	0	0	0	8.82757	0	8.88756	0	10.6665	9.93306	9.78181	0	0	9.92942	0	9.73685	0	0
Kelch-like protein 9	KLHL9	0	0	0	0	0	0	0	0	0	0	0	0	0	0	0	0	0	0	0	0	0	0	0	0	0	0	0	0	0	0	0	0	0	0	7.8759	0	0	0	0	0	0	0	0	0	0	0	0	0
Paraplegin (EC 3.4.24.-) (Cell matrix adhesion regulator) (Spastic paraplegia 7 protein)	SPG7	0	0	0	0	0	0	0	0	0	11.1426	0	0	0	0	0	0	10.4917	0	0	0	0	0	0	0	0	0	0	0	0	0	0	0	0	9.99408	0	10.3241	0	0	0	7.80484	0	0	0	0	10.8262	0	0	12.1705
Seipin (Bernardinelli-Seip congenital lipodystrophy type 2 protein)	BSCL2	0	0	0	0	0	0	0	0	0	0	0	0	0	0	0	10.9423	9.68604	0	0	9.15322	0	0	0	0	0	0	0	0	0	8.77768	0	0	0	0	0	0	0	0	0	0	0	0	0	0	0	0	0	0
Leucine-rich repeat-containing protein 25 (Monocyte and plasmacytoid-activated protein)	LRRC25	0	0	9.79691	8.35255	11.1858	10.1633	9.83263	0	0	10.1229	0	9.40357	0	9.71044	0	0	0	0	9.66566	0	0	0	10.7728	10.1477	10.9049	0	0	0	0	8.38526	0	0	0	0	9.73049	0	0	11.081	10.5085	0	10.4797	9.94583	0	10.5713	0	0	0	10.4661
Hepatocyte growth factor-like protein (Macrophage stimulatory protein) (Macrophage-stimulating protein) (MSP) [Cleaved into: Hepatocyte growth factor-like protein alpha chain; Hepatocyte growth factor-like protein beta chain]	MST1	0	0	10.1195	11.4488	11.6793	10.4222	11.0522	0	0	0	0	10.0776	0	11.7807	0	0	0	0	11.3858	8.26652	0	9.98139	8.91747	11.564	0	0	0	0	0	10.1228	10.9998	11.0222	0	9.33178	9.75368	0	11.4838	10	9.48506	0	0	11.2026	0	11.1126	0	0	0	0
Sulfhydryl oxidase 1 (hQSOX) (EC 1.8.3.2) (Quiescin Q6)	QSOX1	0	0	10.1733	10.4806	12.2144	9.9126	0	0	0	0	0	8.21985	0	10.8021	0	0	0	9.27807	10.8376	0	0	0	9.30019	9.93469	0	0	0	0	0	9.7068	10.4674	10.3513	0	8.89741	8.78928	0	10.6033	0	0	8.74245	0	0	0	11.5256	0	10.057	0	0
Fibroblast growth factor receptor 1 (FGFR-1) (EC 2.7.10.1) (Basic fibroblast growth factor receptor 1) (BFGFR) (bFGF-R-1) (Fms-like tyrosine kinase 2) (FLT-2) (N-sam) (Proto-oncogene c-Fgr) (CD antigen CD331)	FGFR1	0	0	0	0	0	10.4869	0	0	0	0	0	8.69637	0	0	0	0	0	0	0	0	0	0	0	8.6409	9.56071	0	0	0	0	0	9.50378	0	0	0	0	0	0	10.946	0	0	10.1526	0	0	10.1219	0	0	0	0
Ubiquitin-conjugating enzyme E2 E3 (EC 2.3.2.23) (E2 ubiquitin-conjugating enzyme E3) (UbcH9) (Ubiquitin carrier protein E3) (Ubiquitin-conjugating enzyme E2-23 kDa) (Ubiquitin-protein ligase E3)	UBE2E3	0	0	0	7.87653	9.31738	0	9.42877	0	0	0	0	10.0921	0	0	0	0	0	0	0	9.17479	11.7939	10.1113	0	0	11.0235	10.0161	11.6856	0	9.41813	9.31705	10.1192	8.0959	0	0	8.94117	0	0	10.7055	9.17372	11.7541	10.2218	0	0	8.90925	0	10.5458	0	0
NADH dehydrogenase [ubiquinone] 1 beta subcomplex subunit 5, mitochondrial (Complex I-SGDH) (CI-SGDH) (NADH-ubiquinone oxidoreductase SGDH subunit)	NDUFB5	9.86173	10.5697	0	0	0	0	0	10.8151	11.5567	10.7567	9.74621	0	10.5159	0	10.7397	9.30757	10.9793	9.53151	0	0	0	0	0	0	11.4365	0	8.95357	0	8.81814	10.9728	0	7.81157	10.5293	9.84753	0	10.3932	0	0	0	0	11.0297	0	10.0211	0	9.17539	10.8682	9.25472	0
Surfeit locus protein 6	SURF6	9.53763	0	0	0	0	0	0	0	9.00114	9.80064	9.14312	0	0	7.52887	9.93029	0	0	0	0	9.01885	0	8.87695	0	0	10.6414	0	9.20923	9.17567	8.40924	0	0	0	9.1147	0	0	9.41595	0	0	10.1086	8.87763	0	9.20082	9.53598	8.60464	8.87225	8.90505	0	8.94995
ATP synthase mitochondrial F1 complex assembly factor 1 (ATP11 homolog)	ATPAF1	0	9.08275	0	0	0	0	0	0	0	0	0	0	0	0	9.03498	0	10.0159	0	0	8.60789	0	0	0	0	8.64741	0	8.58029	0	9.66286	9.27934	9.0882	0	0	9.26782	9.48369	9.61102	0	0	0	0	0	0	0	8.22523	10.3391	0	0	0
Serine/threonine-protein phosphatase PGAM5, mitochondrial (EC 3.1.3.16) (Bcl-XL-binding protein v68) (Phosphoglycerate mutase family member 5)	PGAM5	0	0	0	0	0	0	0	0	0	0	0	0	0	0	0	0	0	0	0	0	0	0	0	0	0	0	0	0	0	0	0	0	0	8.94716	0	0	0	0	0	0	0	0	0	0	0	0	0	0
Neuronal calcium sensor 1 (NCS-1) (Frequenin homolog) (Frequenin-like protein) (Frequenin-like ubiquitous protein)	NCS1	0	9.6143	0	0	0	0	0	0	10.5824	0	9.84057	0	10.7726	0	9.79791	9.05493	11.4414	9.6801	0	0	0	0	0	0	9.27313	0	9.75269	9.71063	9.46562	0	0	0	9.61594	0	0	9.53133	0	9.31969	0	0	0	0	9.90996	0	9.42751	10.4166	8.93927	9.67678
Glutathione S-transferase Mu 4 (EC 2.5.1.18) (GST class-mu 4) (GST-Mu2) (GSTM4-4) (Leukotriene C4 synthase GSTM4) (EC 4.4.1.20)	GSTM4	0	0	10.616	9.02553	0	0	0	0	0	0	0	0	0	0	0	0	0	0	0	0	0	0	0	0	0	0	0	0	0	0	0	8.72331	0	9.08566	0	0	0	0	0	0	0	10.0861	7.3362	0	0	0	0	0
Tetraspanin-6 (Tspan-6) (A15 homolog) (Putative NF-kappa-B-activating protein 321) (T245 protein) (Tetraspanin TM4-D) (Transmembrane 4 superfamily member 6)	TSPAN6	0	0	0	0	9.47911	8.30827	0	0	0	9.96417	0	0	0	9.45702	0	0	0	9.72074	9.59185	0	0	8.29169	0	0	0	8.55087	0	0	10.06	0	0	0	0	0	0	0	0	8.71646	8.85043	9.78646	8.71948	0	0	8.56654	0	9.61379	0	8.80987
Dermcidin (EC 3.4.-.-) (Preproteolysin) [Cleaved into: Survival-promoting peptide; DCD-1]	DCD	0	0	0	0	9.42271	0	9.39504	0	0	9.78681	0	11.5368	0	0	0	0	0	0	0	10.0973	14.5348	9.03303	14.6699	0	8.89334	11.0864	0	0	0	11.298	0	0	0	0	0	0	0	9.91542	10.6945	0	9.76559	10.5779	0	8.38707	0	0	0	0
Presenilin-1 (PS-1) (EC 3.4.23.-) (Protein S182) [Cleaved into: Presenilin-1 NTF subunit; Presenilin-1 CTF subunit; Presenilin-1 CTF12 (PS1-CTF12)]	PSEN1	0	0	0	0	10.4446	0	0	0	0	0	0	0	0	0	0	0	0	0	0	0	0	0	0	0	10.3405	10.8535	0	0	0	0	0	10.8375	0	0	0	0	0	10.2012	10.8903	9.7127	9.53419	0	0	0	0	0	0	0
CSC1-like protein 1 (Transmembrane protein 63A)	TMEM63A	0	0	0	0	10.47	12.0343	0	0	0	9.15694	0	0	0	9.4767	0	0	0	0	0	0	0	9.27196	10.6514	9.38764	0	10.7096	0	0	0	9.62768	9.84168	9.05249	0	0	9.51349	0	8.79245	9.60562	10.1465	0	0	10.0445	0	0	0	0	0	0
Riboflavin kinase (EC 2.7.1.26) (ATP:riboflavin 5'-phosphotransferase) (Flavokinase)	RFK	0	0	0	0	0	0	0	0	10.5517	0	0	0	10.5373	0	0	0	10.424	0	0	0	0	0	0	0	0	0	0	11.0564	0	0	0	0	0	0	0	0	0	0	0	0	0	0	8.81381	0	9.2645	10.0614	0	0
Transmembrane glycoprotein NMB (Hematopoietic growth factor inducible neurokinin-1 type)	GPNMB	0	0	10.4028	7.54103	10.1055	8.27417	0	0	0	8.97548	0	7.70219	0	0	0	0	0	0	11.5534	0	9.90307	10.7703	10.5011	9.62409	10.5391	10.0341	0	0	0	8.43739	10.8838	8.02939	0	0	0	0	0	10.7942	10.0706	10.7181	0	0	0	9.11617	10.5271	0	9.03157	0
Secreted phosphoprotein 24 (Spp-24) (Secreted phosphoprotein 2)	SPP2	0	0	10.8003	11.7192	8.20185	11.4137	11.9152	0	0	11.5125	0	10.3047	0	9.3859	0	10.2477	0	0	11.7425	0	0	0	8.4812	11.1129	0	0	0	0	10.2875	8.38593	9.55737	10.774	0	0	0	0	9.62949	0	11.9794	0	0	13.0659	0	11.0653	0	0	0	0
Uncharacterized protein C6orf47 (Protein G4)	C6orf47	0	0	0	0	0	0	0	0	0	0	0	9.50437	0	0	0	0	0	0	0	9.76073	0	0	0	0	10.4688	0	0	0	0	0	0	0	0	0	0	0	0	10.471	0	0	9.07231	0	0	0	0	0	0	0
Cytosolic iron-sulfur assembly component 2A (MIP18 family protein FAM96A)	CIAO2A	0	0	0	0	10.3609	0	0	0	0	0	0	0	9.23268	0	0	0	0	0	0	0	8.65319	0	9.12258	0	8.49548	0	0	9.19724	0	8.1107	0	9.23275	0	0	0	0	0	0	0	0	0	8.48351	0	8.75535	0	0	0	0
Podocan	PODN	0	0	9.56531	10.9992	0	9.06407	10.4927	0	0	11.0003	0	0	0	11.2244	0	8.4553	0	0	10.8353	0	0	0	12.0832	10.8051	0	0	0	0	8.93994	9.88407	10.5597	11.215	0	8.70543	9.69156	0	10.2766	0	9.59537	9.40078	0	9.743	0	10.9172	0	0	0	10.6829
Iron-sulfur cluster assembly 2 homolog, mitochondrial (HESB-like domain-containing protein 1)	ISCA2	0	0	0	0	0	0	0	0	0	0	0	0	0	0	0	0	0	0	0	7.34677	0	0	0	0	0	0	0	0	0	0	0	8.09836	0	0	0	0	0	0	10.6879	0	0	10.9073	0	0	0	0	0	10.1095
Mitochondrial intermediate peptidase (MIP) (EC 3.4.24.59)	MIPEP	0	0	0	0	0	0	0	0	0	0	9.39801	0	0	0	0	9.12534	0	0	0	0	0	0	0	0	0	0	0	0	0	0	0	0	0	0	0	0	0	0	0	0	0	0	8.39418	0	9.68946	10.4648	0	0
Heterogeneous nuclear ribonucleoprotein D-like (hnRNP D-like) (hnRNP DL) (AU-rich element RNA-binding factor) (JKT41-binding protein) (Protein laAUF1)	HNRNPDL	0	0	0	0	0	0	0	0	0	8.65065	0	0	0	0	0	0	9.29762	0	0	0	10.8569	0	0	0	8.71059	0	0	0	0	7.82017	0	0	0	0	0	0	0	0	9.00943	0	0	0	0	0	0	0	0	9.25044
Syntaxin-binding protein 6 (Amisyn)	STXBP6	10.7054	10.8023	0	0	0	0	0	0	0	0	10.7275	0	0	0	0	0	10.7231	0	0	8.50935	0	0	0	0	0	9.50891	0	0	0	0	0	0	9.16469	0	0	0	0	0	0	7.8034	0	0	9.68584	0	0	0	9.12567	0
Synaptotagmin-like protein 2 (Breast cancer-associated antigen SGA-72M) (Exophilin-4)	SYTL2	0	0	0	0	0	0	0	0	0	0	0	0	0	0	0	0	8.1799	0	7.92538	0	0	0	0	0	0	0	9.00747	0	0	0	8.72413	0	0	0	0	0	8.57539	0	0	9.13036	0	0	0	0	0	0	0	0
Cytohesin-3 (ARF nucleotide-binding site opener 3) (Protein ARNO3) (General receptor of phosphoinositides 1) (Grp1) (PH, SEC7 and coiled-coil domain-containing protein 3)	CYTH3	0	0	0	8.20723	0	0	0	0	0	0	0	0	0	0	0	0	10.4105	0	0	9.06107	0	8.60324	0	0	9.76219	9.62949	0	0	0	7.72684	9.81716	0	0	0	8.40561	0	0	0	8.40749	0	9.28892	0	9.67314	0	0	0	0	0
Zinc finger protein ZIC 2 (Zinc finger protein of the cerebellum 2)	ZIC2	0	0	0	0	0	0	0	0	0	9.35825	0	0	0	0	0	0	0	0	0	0	11.2623	9.28047	0	0	10.3252	9.03944	0	0	0	0	0	0	8.86821	0	0	8.73273	0	0	9.15676	0	0	0	0	0	0	0	0	0
Cytochrome c oxidase subunit 6C (Cytochrome c oxidase polypeptide VIc)	COX6C	8.81106	9.24982	0	0	0	0	0	10.2316	10.2943	0	0	0	11.1742	0	10.5129	8.33272	12.2299	9.24839	0	9.73824	9.19425	0	0	0	0	0	10.344	11.6012	10.0496	0	0	0	11.5959	7.9023	10.1367	9.28173	0	0	0	0	0	0	9.5846	0	9.48671	12.6746	7.01589	9.38788
Methylsterol monooxygenase 1 (EC 1.14.18.9) (C-4 methylsterol oxidase) (Sterol-C4-methyl oxidase)	MSMO1	0	0	0	7.56704	0	0	0	0	0	0	0	0	0	0	0	0	10.534	0	0	0	0	9.9523	0	0	0	0	0	0	10.517	0	0	0	9.89542	0	0	0	0	0	10.1707	0	0	0	0	0	0	8.55176	0	0
GDP-fucose transporter 1 (Solute carrier family 35 member C1)	SLC35C1	0	0	0	0	0	0	0	0	0	0	0	0	0	0	0	0	0	0	0	10.2042	0	0	0	0	0	0	0	0	0	0	0	0	0	0	0	0	0	0	0	0	0	0	0	0	0	0	0	0
Sex hormone-binding globulin (SHBG) (Sex steroid-binding protein) (SBP) (Testis-specific androgen-binding protein) (ABP) (Testosterone-estradiol-binding globulin) (TeBG) (Testosterone-estrogen-binding globulin)	SHBG	0	0	10.5562	12.5369	0	10.6149	11.8056	0	0	0	0	8.50048	0	11.2054	0	0	0	0	11.4261	0	0	0	9.33971	11.9217	0	0	0	0	0	9.36621	0	11.7475	0	10.5536	9.32757	0	8.78926	0	0	0	0	0	0	11.0822	0	0	0	0
Charged multivesicular body protein 5 (Chromatin-modifying protein 5) (SNF7 domain-containing protein 2) (Vacuolar protein sorting-associated protein 60) (Vps60) (hVps60)	CHMP5	0	0	0	0	0	0	0	12.2024	11.9862	0	0	0	11.9989	0	10.8438	0	11.1851	10.8845	0	9.17818	10.2407	9.42422	0	0	0	0	11.6907	10.0248	11.4692	8.8791	0	8.55221	11.3282	0	0	9.88252	0	0	10.4019	10.8491	0	11.1966	10.3682	9.53923	9.30807	11.4536	10.6635	11.1432
Immunoglobulin lambda variable 3-21 (Ig lambda chain V-III region LOI) (Ig lambda chain V-V region DEL) (Ig lambda chain V-VII region MOT)	IGLV3-21	0	0	8.85231	11.4766	0	11.6615	11.5378	0	0	0	0	13.2037	0	10.7565	0	0	0	0	12.0891	0	0	0	10.4201	12.2105	0	0	0	0	0	9.19956	10.3472	11.0616	0	10.3849	8.41883	0	8.75099	9.46239	0	0	7.41581	11.1214	0	0	0	0	0	0
Histone H3.2 (H3-clustered histone 13) (H3-clustered histone 14) (H3-clustered histone 15) (Histone H3/m) (Histone H3/o)	H3C15	8.04589	0	0	0	0	0	0	0	12.6565	0	9.01666	0	10.2787	7.96116	11.0776	6.00598	0	0	6.55173	0	11.0622	0	8.30377	0	0	0	0	11.4606	0	0	0	0	11.8553	8.05841	0	0	0	0	0	0	0	0	12.41	0	8.17576	0	7.24378	10.9766
Peroxisomal bifunctional enzyme (PBE) (PBFE) (L-bifunctional protein) (LBP) (Multifunctional enzyme 1) (MFE1) [Includes: Enoyl-CoA hydratase/3,2-trans-enoyl-CoA isomerase (EC 4.2.1.17) (EC 5.3.3.8); 3-hydroxyacyl-CoA dehydrogenase (EC 1.1.1.35)]	EHHADH	0	0	0	0	0	0	0	0	0	10.4245	0	8.04818	0	0	0	0	0	0	0	0	0	0	0	0	0	11.3008	0	0	0	0	0	0	0	0	0	0	0	0	0	8.87766	0	0	0	0	0	0	0	0
Something about silencing protein 10 (Charged amino acid-rich leucine zipper 1) (CRL1) (Disrupter of silencing SAS10) (UTP3 homolog)	UTP3	0	0	0	0	8.79647	0	0	0	0	9.11735	0	7.36447	0	0	0	0	0	0	0	7.40976	0	0	0	0	9.10413	0	0	0	0	0	0	0	0	0	0	0	0	0	9.01363	9.24073	9.46332	0	0	0	0	0	9.84635	0
General transcription factor 3C polypeptide 4 (EC 2.3.1.48) (TF3C-delta) (Transcription factor IIIC 90 kDa subunit) (TFIIIC 90 kDa subunit) (TFIIIC90) (Transcription factor IIIC subunit delta)	GTF3C4	0	0	0	0	0	0	0	0	0	0	0	0	0	0	0	0	0	0	0	6.39982	0	0	8.92462	0	0	10.4198	0	0	0	0	0	0	0	0	0	0	0	0	0	0	0	0	0	0	0	0	0	0
Protein mono-ADP-ribosyltransferase PARP10 (EC 2.4.2.-) (ADP-ribosyltransferase diphtheria toxin-like 10) (ARTD10) (Poly [ADP-ribose] polymerase 10) (PARP-10)	PARP10	0	0	0	0	0	0	0	0	0	0	0	0	0	0	0	0	0	0	0	0	0	0	0	0	0	0	0	0	0	0	0	0	0	8.5136	0	0	0	0	0	0	0	0	0	0	0	0	0	0
TRPM8 channel-associated factor 1 (TRP channel-associated factor 1)	TCAF1	0	0	0	0	0	0	0	0	0	0	0	0	0	0	0	0	8.22942	0	0	0	0	0	0	0	0	0	0	0	0	0	8.88331	0	0	8.9594	9.05836	9.16608	10.0864	0	0	0	0	0	0	0	0	0	0	0
1-acyl-sn-glycerol-3-phosphate acyltransferase delta (EC 2.3.1.51) (1-acylglycerol-3-phosphate O-acyltransferase 4) (1-AGP acyltransferase 4) (1-AGPAT 4) (Lysophosphatidic acid acyltransferase delta) (LPAAT-delta)	AGPAT4	0	0	0	0	0	0	0	0	0	0	0	0	0	0	0	0	0	0	0	0	0	0	0	0	0	0	0	0	0	9.5055	0	9.02447	0	0	0	0	9.55483	10.4089	0	0	10.568	0	9.95858	10.5438	0	0	0	0
BDNF/NT-3 growth factors receptor (EC 2.7.10.1) (GP145-TrkB) (Trk-B) (Neurotrophic tyrosine kinase receptor type 2) (TrkB tyrosine kinase) (Tropomyosin-related kinase B)	NTRK2	0	0	0	0	0	0	0	0	0	0	0	0	0	7.43408	0	0	10.4744	0	0	0	0	0	0	8.30262	0	0	9.9093	0	0	0	8.91499	8.50238	0	0	8.01822	0	0	10.9187	0	0	10.4082	0	0	10.1475	0	0	0	12.6583
Large ribosomal subunit protein uL2m (39S ribosomal protein L2, mitochondrial) (L2mt) (MRP-L2)	MRPL2	0	0	0	0	0	0	0	0	0	0	9.59387	0	0	0	0	0	0	0	0	0	9.86398	0	0	0	0	10.0824	0	0	8.66697	0	0	0	8.68468	0	0	8.27636	0	0	0	9.0459	0	0	9.14397	0	8.53631	0	0	0
Ras-related C3 botulinum toxin substrate 3 (EC 3.6.5.2) (p21-Rac3)	RAC3	0	0	0	0	0	8.79577	0	0	0	0	0	0	0	0	0	9.09546	12.0949	0	8.30839	0	0	0	0	8.40143	0	0	10.0828	12.0412	7.92746	0	9.22208	8.95995	0	7.86341	0	9.19417	0	0	0	0	0	0	0	0	0	0	8.45775	0
ADP-ribose pyrophosphatase, mitochondrial (EC 3.6.1.13) (ADP-ribose diphosphatase) (ADP-ribose phosphohydrolase) (Adenosine diphosphoribose pyrophosphatase) (ADPR-PPase) (Nucleoside diphosphate-linked moiety X motif 9) (Nudix motif 9)	NUDT9	0	0	0	0	0	0	0	0	0	0	0	0	0	0	0	0	0	9.79019	0	0	8.22462	0	0	0	0	0	0	0	0	0	0	0	0	0	0	0	0	0	0	0	0	0	0	0	0	0	0	0
Coiled-coil domain-containing protein 86 (Cytokine-induced protein with coiled-coil domain)	CCDC86	9.90737	10.7772	0	0	0	0	0	10.911	0	0	0	0	10.4001	0	11.2028	9.80164	0	8.59542	0	0	9.37609	0	0	0	10.1335	0	8.83819	10.1683	8.46733	0	0	0	9.82139	0	0	9.51547	0	0	0	0	0	0	10.1435	0	0	8.62861	9.21218	11.0742
Mitogen-activated protein kinase kinase kinase 5 (EC 2.7.11.25) (Apoptosis signal-regulating kinase 1) (ASK-1) (MAPK/ERK kinase kinase 5) (MEK kinase 5) (MEKK 5)	MAP3K5	0	0	0	0	0	0	9.77963	0	0	0	0	0	0	0	0	0	0	0	0	0	0	0	0	0	0	0	0	0	0	0	9.50314	0	0	0	0	0	0	0	9.15981	0	0	9.99048	0	9.98352	0	0	0	0
Inactive cell surface hyaluronidase CEMIP2 (Cell migration-inducing hyaluronidase 2) (Transmembrane protein 2)	CEMIP2	0	0	0	0	0	0	0	0	0	0	0	0	0	0	0	0	0	0	0	7.94848	0	0	0	0	0	11.1335	0	0	0	0	0	0	0	0	9.08143	0	9.11241	0	0	0	0	0	0	0	0	0	9.25494	0
Apolipoprotein F (Apo-F) (Lipid transfer inhibitor protein) (LTIP)	APOF	0	0	0	9.83043	10.9869	13.3112	10.0531	0	0	9.51366	0	13.7611	0	9.41327	0	0	0	0	11.5589	0	0	9.58325	10.248	12.8205	0	0	0	0	0	11.2224	11.154	10.9176	0	0	8.98331	0	0	10.9496	9.99785	0	0	10.1559	0	10.2645	0	0	0	9.18305
Calcium release-activated calcium channel protein 1 (Protein orai-1) (Transmembrane protein 142A)	ORAI1	0	0	0	0	0	0	0	0	0	0	0	0	0	10.2134	0	0	0	0	0	0	0	0	0	0	0	0	0	0	0	0	0	0	0	0	0	0	0	0	10.1724	0	0	0	0	0	0	0	0	0
Endosialin (Tumor endothelial marker 1) (CD antigen CD248)	CD248	0	0	0	9.50752	9.2553	10.0661	9.36106	0	0	0	0	8.85349	0	0	0	0	0	0	0	0	0	0	11.7734	0	8.22634	0	0	0	0	9.13921	0	10.4512	0	0	8.3885	0	9.2003	9.42516	0	0	8.62642	0	0	8.8618	0	0	0	0
Leucine-rich repeat-containing protein 40	LRRC40	0	0	0	0	0	0	0	0	0	0	0	0	0	0	0	0	9.38083	0	0	8.60797	0	0	0	9.99554	0	0	0	11.2409	0	0	10.223	0	0	10.5233	0	0	10.1489	0	0	0	10.6121	0	0	10.0285	0	0	0	0
Double-stranded RNA-binding protein Staufen homolog 2	STAU2	0	0	0	0	0	0	0	8.90626	10.0876	8.20381	0	0	0	0	0	0	0	0	0	0	9.43693	8.12278	0	0	0	8.94651	0	0	0	0	0	0	11.0599	9.61415	0	0	0	0	0	0	8.89383	7.89092	9.57194	0	0	11.0603	0	0
Type-1 angiotensin II receptor-associated protein (AT1 receptor-associated protein)	AGTRAP	0	0	0	0	9.6844	0	0	0	0	9.32503	0	0	0	10.039	0	0	0	0	0	0	13.2046	0	0	10.8817	0	0	0	0	0	0	0	0	0	0	0	0	0	9.17511	0	0	0	9.33349	0	8.82642	0	0	0	0
Transcriptional repressor p66-alpha (Hp66alpha) (GATA zinc finger domain-containing protein 2A)	GATAD2A	0	0	0	0	0	0	0	0	0	0	0	0	0	0	0	0	0	0	0	0	7.11323	9.42887	0	0	0	0	0	0	0	0	0	0	0	0	0	0	0	0	0	7.72244	0	9.55775	0	0	0	0	0	0
Alpha-methylacyl-CoA racemase (EC 5.1.99.4) (2-methylacyl-CoA racemase)	AMACR	0	0	0	9.93632	0	0	0	0	0	10.1102	0	0	0	0	0	0	0	0	0	0	0	0	0	0	0	0	0	10.017	0	0	0	0	0	8.824	0	0	0	0	0	0	0	0	0	0	0	0	0	0
[Pyruvate dehydrogenase (acetyl-transferring)] kinase isozyme 1, mitochondrial (EC 2.7.11.2) (Pyruvate dehydrogenase kinase isoform 1) (PDH kinase 1)	PDK1	0	11.0851	0	0	0	0	0	11.9459	0	0	9.79933	0	0	0	11.0862	0	10.8382	0	0	0	0	0	0	0	0	0	0	9.12475	0	0	0	0	0	8.27826	0	0	0	0	0	0	0	0	0	0	0	0	8.8372	0
Potassium/sodium hyperpolarization-activated cyclic nucleotide-gated channel 1 (Brain cyclic nucleotide-gated channel 1) (BCNG-1)	HCN1	0	0	8.20103	0	0	0	0	0	0	8.79171	9.97819	0	0	6.39579	0	0	8.5984	0	0	8.77728	9.99184	0	0	8.54955	8.63288	9.53104	0	7.93518	0	7.96905	8.77427	0	0	0	0	0	5.78803	0	0	9.71754	9.80787	8.81884	0	8.36668	0	0	0	0
Indolethylamine N-methyltransferase (Indolamine N-methyltransferase) (EC 2.1.1.49) (EC 2.1.1.96) (Aromatic alkylamine N-methyltransferase) (Amine N-methyltransferase) (Arylamine N-methyltransferase) (Thioether S-methyltransferase) (TEMT)	INMT	0	0	9.52889	0	0	7.36597	0	0	0	0	0	0	0	0	0	0	0	0	0	0	0	0	0	0	11.221	0	11.8553	9.77773	0	0	0	0	0	0	10.5484	9.58127	0	9.81756	0	0	12.6436	0	0	10.9245	0	8.02036	8.06949	0
Protein-S-isoprenylcysteine O-methyltransferase (EC 2.1.1.100) (Isoprenylcysteine carboxylmethyltransferase) (Prenylated protein carboxyl methyltransferase) (PPMT) (Prenylcysteine carboxyl methyltransferase) (pcCMT)	ICMT	9.51413	0	0	0	0	0	0	9.45299	9.40051	0	0	0	10.6595	0	10.9494	0	0	9.0181	0	0	0	0	0	0	9.98757	0	0	9.2942	8.98682	0	0	0	9.61539	9.93505	0	0	0	0	9.4799	0	0	0	8.5642	0	0	8.8333	0	0
Putative annexin A2-like protein (Annexin A2 pseudogene 2) (Lipocortin II pseudogene)	ANXA2P2	0	0	0	8.71435	0	0	9.04209	0	0	0	0	0	0	0	0	0	0	0	0	0	0	0	0	0	0	8.84529	0	0	0	0	9.58667	0	0	0	0	0	9.09884	0	8.3577	0	9.68677	7.98493	0	9.01708	0	0	0	0
Endoplasmic reticulum aminopeptidase 2 (EC 3.4.11.-) (Leukocyte-derived arginine aminopeptidase) (L-RAP)	ERAP2	9.33363	9.15618	8.45073	0	8.3124	9.97914	9.59067	7.89495	9.99736	0	9.45086	6.68204	8.47091	0	8.38873	10.4853	0	8.63569	8.43383	7.52026	0	6.13865	8.18064	8.83702	8.95555	7.95045	8.3329	9.33739	9.2352	8.50383	9.03425	8.95462	9.53576	0	8.94518	8.46994	0	9.46772	8.67801	0	8.67354	9.40334	0	0	0	8.8983	10.4728	9.31555
Deubiquitinase OTUD6B (EC 3.4.19.12) (DUBA-5) (OTU domain-containing protein 6B)	OTUD6B	0	0	0	0	8.1942	0	0	0	0	9.58623	0	0	0	0	0	0	0	0	0	8.01839	9.96113	9.11173	0	0	8.54331	0	9.34434	0	0	0	0	0	0	0	0	0	0	0	9.77202	0	8.9293	0	0	8.6015	0	0	0	9.82632
GPI ethanolamine phosphate transferase 3 (EC 2.-.-.-) (Phosphatidylinositol-glycan biosynthesis class O protein) (PIG-O)	PIGO	0	0	0	0	0	10.4745	0	0	0	0	0	0	0	0	0	0	0	0	0	0	0	0	0	0	0	0	0	0	0	0	0	0	0	0	0	0	0	0	0	0	0	0	0	0	0	0	0	0
Palmdelphin (Paralemmin-like protein)	PALMD	0	9.53525	0	0	0	0	0	0	0	0	9.35634	0	0	9.49073	11.1738	9.43569	0	0	0	0	0	10.2969	0	7.2251	0	0	0	0	9.02412	0	0	0	8.78974	0	0	7.96547	0	0	10.5167	10.054	0	8.88695	7.83001	0	8.38555	8.5678	9.21998	10.5761
Protocadherin beta-16 (PCDH-beta-16) (Protocadherin-3X)	PCDHB16	0	0	0	0	0	0	0	0	0	0	0	0	0	0	0	0	0	0	0	0	0	0	0	0	0	0	0	0	0	0	0	0	0	0	0	9.65129	0	0	0	0	0	0	0	0	9.5876	0	0	13.1203
Nucleolar transcription factor 1 (Autoantigen NOR-90) (Upstream-binding factor 1) (UBF-1)	UBTF	0	0	0	0	0	0	0	0	0	10.0386	0	0	0	8.78422	10.5716	0	0	0	0	0	0	10.4982	0	0	9.39237	0	0	0	0	0	0	0	0	0	0	0	0	0	0	0	0	9.15202	0	0	0	0	0	0
Coiled-coil domain-containing protein 8	CCDC8	0	0	0	0	0	0	10.0885	0	0	0	0	0	0	0	11.3274	0	0	0	0	0	0	0	0	0	0	0	0	0	0	0	0	0	8.92589	0	0	0	0	0	11.6077	0	0	0	0	0	0	0	0	10.9018
Mothers against decapentaplegic homolog 1 (MAD homolog 1) (Mothers against DPP homolog 1) (JV4-1) (Mad-related protein 1) (SMAD family member 1) (SMAD 1) (Smad1) (hSMAD1) (Transforming growth factor-beta-signaling protein 1) (BSP-1)	SMAD1	0	0	0	0	0	0	0	0	0	0	0	0	0	0	0	0	0	0	0	0	0	0	0	0	0	9.46992	0	0	0	8.89182	8.56998	0	0	0	0	0	0	0	0	0	10.608	9.55621	0	0	0	0	0	0
Vitamin K epoxide reductase complex subunit 1 (EC 1.17.4.4) (Vitamin K1 2,3-epoxide reductase subunit 1)	VKORC1	0	0	10.9096	9.95	12.4996	12.0821	11.7088	13.9667	0	0	0	0	0	9.57592	0	0	0	0	0	10.9956	0	0	10.5537	11.7228	0	12.1423	0	0	10.6992	11.1657	11.349	10.733	0	0	9.4415	11.0435	11.5888	13.2559	0	0	0	0	0	12.2893	0	9.18897	12.7089	0
ADP-ribosylation factor GTPase-activating protein 3 (ARF GAP 3)	ARFGAP3	0	0	0	0	0	0	0	10.6062	0	0	0	0	0	0	0	0	0	0	0	0	0	0	0	0	0	0	0	0	0	9.74485	8.7388	0	0	0	0	0	0	0	0	0	10.2563	0	0	0	9.67991	0	0	0
Required for meiotic nuclear division protein 1 homolog	RMND1	0	0	0	0	0	0	0	0	0	0	0	0	0	0	0	0	10.0811	0	0	0	0	0	0	0	0	0	0	11.1147	0	0	0	0	0	0	0	0	0	0	0	0	0	0	0	0	0	0	0	0
Secreted frizzled-related protein 1 (FRP-1) (sFRP-1) (Secreted apoptosis-related protein 2) (SARP-2)	SFRP1	0	0	8.75407	9.19701	7.5508	8.81776	9.27067	0	0	8.64606	0	0	0	0	0	9.1232	0	9.10839	8.46371	0	0	9.29642	8.55004	9.96446	7.99193	9.74517	10.8711	0	10.5348	8.20743	9.35854	10.3544	0	0	0	0	0	7.62928	9.91192	8.35109	10.6607	0	0	9.458	8.37394	9.36825	0	10.467
Carboxypeptidase B2 (EC 3.4.17.20) (Carboxypeptidase U) (CPU) (Plasma carboxypeptidase B) (pCPB) (Thrombin-activable fibrinolysis inhibitor) (TAFI)	CPB2	0	0	10.6585	11.0138	10.9943	11.5287	10.2932	0	0	9.30929	0	12.1908	0	11.1247	0	0	0	0	12.2122	7.99392	0	9.85451	11.1525	10.9123	0	0	0	0	0	9.87158	10.3673	11.065	0	10.1607	10.3186	0	10.4354	9.32596	0	0	8.52752	10.1215	0	10.6516	9.03741	9.04291	0	0
Guanine nucleotide-binding protein subunit alpha-12 (G alpha-12) (G-protein subunit alpha-12)	GNA12	0	0	9.65199	0	0	9.72181	0	0	0	10.4507	0	7.7394	0	0	0	0	9.71902	0	0	6.56321	0	8.15404	0	9.10542	9.0991	9.58606	0	7.49355	9.47715	7.61988	0	0	8.262	0	8.9106	0	0	0	9.27821	0	9.48285	9.30651	0	8.97647	0	0	0	9.4008
Dipeptidyl peptidase 8 (DP8) (EC 3.4.14.5) (Dipeptidyl peptidase IV-related protein 1) (DPRP-1) (Dipeptidyl peptidase VIII) (DPP VIII) (Prolyl dipeptidase DPP8)	DPP8	0	0	0	0	0	0	0	0	0	0	0	0	0	0	0	9.83121	0	0	0	0	0	0	0	0	0	0	0	0	0	8.5974	0	0	0	0	7.98931	0	0	0	0	0	0	0	0	0	0	0	0	0
Ras-related protein Rab-30	RAB30	0	0	0	0	0	11.0886	0	0	0	0	0	9.14193	0	9.57693	0	10.8724	9.88959	0	0	9.57925	11.347	0	0	0	0	0	9.12031	0	0	0	0	9.69279	8.09519	0	0	8.40029	0	0	0	11.4132	0	0	0	0	9.65728	0	10.3689	0
Protein MAK16 homolog (NNP78) (Protein RBM13)	MAK16	0	0	0	0	0	0	0	0	0	0	0	9.06095	0	0	0	0	0	0	0	0	12.0909	0	0	0	9.20068	0	0	0	0	0	0	0	0	0	8.26469	0	0	0	0	0	0	8.78095	0	0	0	0	0	0
Calponin-1 (Basic calponin) (Calponin H1, smooth muscle)	CNN1	8.9124	0	12.3009	0	0	0	0	0	8.99541	0	0	0	0	12.0442	10.5085	9.82535	0	9.11027	8.68435	0	0	0	8.76916	7.5779	0	0	0	0	0	0	13.5493	9.39212	0	0	0	8.18231	10.7968	0	0	0	0	0	8.53174	12.3565	0	0	0	9.83439
Glia maturation factor gamma (GMF-gamma)	GMFG	8.73423	0	0	0	0	0	0	8.98026	7.20573	0	6.96713	0	0	0	8.02436	7.94421	8.45701	9.54551	0	0	8.9658	0	9.2001	0	8.14544	0	9.50802	8.84892	10.2176	0	0	0	8.58735	8.30184	8.6445	8.46372	0	0	0	0	9.50218	8.14302	8.39294	9.5092	10.0073	10.3592	8.00401	8.89712
Glutathione S-transferase theta-1 (EC 2.5.1.18) (GST class-theta-1) (Glutathione transferase T1-1)	GSTT1	0	10.3698	9.94972	0	0	7.88462	7.36674	10.1044	0	7.94326	0	0	10.8233	8.563	0	0	9.32748	9.95864	0	0	0	0	0	0	0	0	0	10.36	9.43844	0	0	8.83998	0	10.0869	7.57762	0	0	0	9.08471	0	0	0	0	0	0	0	9.79656	0
1-phosphatidylinositol 4,5-bisphosphate phosphodiesterase epsilon-1 (EC 3.1.4.11) (Pancreas-enriched phospholipase C) (Phosphoinositide phospholipase C-epsilon-1) (Phospholipase C-epsilon-1) (PLC-epsilon-1)	PLCE1	0	0	0	0	0	0	0	0	0	0	0	0	0	0	0	0	0	0	0	0	0	0	0	0	0	0	0	0	0	0	0	0	0	0	0	0	0	0	0	0	0	0	0	0	0	0	0	0
CBP80/20-dependent translation initiation factor	CTIF	0	0	0	0	0	0	0	9.93948	9.98926	0	0	0	0	0	0	0	0	8.85491	0	8.30348	9.42149	0	0	0	0	0	10.1418	0	0	0	8.99937	0	0	0	0	0	0	8.4384	9.80436	0	9.51187	0	8.77685	0	8.43227	8.88272	0	10.5731
Bridge-like lipid transfer protein family member 2 (Antigen MLAA-22) (Breast cancer-overexpressed gene 1 protein) (Protein hobbit homolog)	BLTP2	0	0	0	0	0	0	0	0	0	0	0	0	0	0	0	0	0	0	0	0	0	0	0	0	0	0	0	0	0	0	0	0	0	0	0	0	0	0	0	8.72863	0	0	0	0	0	0	0	0
Nicotinamide N-methyltransferase (EC 2.1.1.1)	NNMT	0	0	9.45282	9.59746	0	7.59387	9.78219	0	0	8.43933	7.91907	0	0	0	9.56111	8.09973	8.74172	0	9.32606	0	0	0	9.49505	9.88727	10.0651	0	8.8691	0	0	8.63523	9.82155	9.25431	0	10.9198	9.72849	9.3769	0	10.1488	0	9.01947	9.9612	0	8.40092	9.95499	0	0	6.73925	0
Filamin-B (FLN-B) (ABP-278) (ABP-280 homolog) (Actin-binding-like protein) (Beta-filamin) (Filamin homolog 1) (Fh1) (Filamin-3) (Thyroid autoantigen) (Truncated actin-binding protein) (Truncated ABP)	FLNB	0	0	0	0	0	0	0	0	0	0	0	0	0	0	0	0	0	0	0	10.1071	0	0	0	0	0	11.002	0	0	0	0	0	0	0	0	0	9.63181	0	10.7773	0	0	10.8222	0	0	0	8.65802	8.43403	0	0
Slit homolog 3 protein (Slit-3) (Multiple epidermal growth factor-like domains protein 5) (Multiple EGF-like domains protein 5)	SLIT3	0	0	0	8.52305	0	8.40964	0	0	0	0	0	0	0	0	0	0	0	0	0	0	0	0	9.08832	0	0	10.2252	0	0	0	0	9.24631	9.67336	0	0	0	0	0	0	0	0	0	0	0	0	0	0	0	0
Adaptin ear-binding coat-associated protein 1 (NECAP endocytosis-associated protein 1) (NECAP-1)	NECAP1	10.3533	0	0	0	0	0	9.10133	9.60043	10.3173	0	9.30104	0	0	0	0	10.0292	10.8565	8.0843	8.44628	0	0	0	0	0	0	0	8.07411	0	8.13876	0	0	0	7.84235	0	0	9.01902	0	0	0	0	0	0	9.38625	0	8.51092	7.43954	0	11.3357
Protein OSCP1 (hOSCP1) (Organic solute transport protein 1) (Oxidored-nitro domain-containing protein 1)	OSCP1	0	0	0	0	0	0	0	0	0	0	0	0	0	0	10.2716	0	0	0	0	0	0	0	0	0	0	0	0	0	0	0	0	0	0	0	0	0	0	0	0	0	0	0	0	0	0	0	0	0
Immunoglobulin kappa variable 2-29	IGKV2-29	0	0	0	10.5818	10.7444	6.94289	11.2357	0	0	0	7.09028	11.5554	0	9.45052	0	0	0	0	8.95083	0	0	0	8.43318	10.6575	0	0	0	0	0	9.00692	9.63711	10.082	9.11641	9.36763	0	0	0	0	0	0	10.3662	0	0	12.2319	0	9.69936	6.94323	10.3979
Guanine nucleotide-binding protein G(z) subunit alpha (G(x) alpha chain) (Gz-alpha)	GNAZ	0	0	0	0	10.0352	10.1869	0	0	0	0	0	0	0	9.19792	0	0	11.6589	0	9.48235	0	0	9.3301	0	0	0	0	0	10.007	8.21599	0	8.75643	0	9.55009	8.09922	0	0	0	0	9.56823	0	0	8.8085	8.29541	9.76735	9.21421	7.81908	0	0
Transmembrane protein 160	TMEM160	0	0	0	0	0	0	0	12.1941	0	10.3202	0	8.54905	11.2641	0	0	0	13.4494	0	10.2275	8.53208	10.8738	9.79649	0	0	0	10.2785	0	13.5058	0	9.3599	0	0	0	0	9.35524	0	9.21867	0	11.5963	10.6799	10.6473	10.1654	0	10.0091	0	12.4687	0	0
Acyl-coenzyme A diphosphatase NUDT19 (EC 3.6.1.-) (Nucleoside diphosphate-linked moiety X motif 19) (Nudix motif 19)	NUDT19	0	0	0	0	0	0	0	0	10.7439	0	0	0	0	0	10.6392	0	9.41883	10.028	0	0	8.028	0	0	0	0	0	0	0	0	0	0	0	0	8.57964	0	9.29889	0	0	0	0	0	0	0	0	8.71809	10.6238	0	0
Collagen alpha-1(VIII) chain (Endothelial collagen) [Cleaved into: Vastatin]	COL8A1	0	0	9.66447	10.3575	8.99298	9.76408	11.406	0	0	9.16071	0	7.66239	0	0	0	0	0	0	10.1181	0	0	8.30064	11.0119	10.4977	8.78133	0	0	0	0	8.37173	10.9841	10.2999	0	8.89419	8.39981	0	0	8.79733	0	0	9.58254	0	8.18282	10.2181	0	0	0	10.1098
Mitochondrial outer membrane protein SLC25A46 (Solute carrier family 25 member 46)	SLC25A46	0	0	0	0	0	0	0	0	0	0	0	0	0	0	0	0	0	0	0	8.03502	0	0	0	0	0	0	0	0	0	0	0	0	0	0	0	0	0	0	0	0	0	0	0	0	0	0	0	0
Protein Z-dependent protease inhibitor (PZ-dependent protease inhibitor) (PZI) (Serpin A10)	SERPINA10	0	0	10.4005	9.55181	11.9082	11.5183	10.129	0	0	0	0	10.4576	0	11.0859	0	0	0	0	11.6915	7.69521	0	0	10.338	10.3839	0	0	0	0	0	9.1766	10.0667	10.7578	0	9.66621	8.01257	0	10.4996	0	0	0	0	10.6481	0	10.5901	0	0	0	0
Death-associated protein kinase 3 (DAP kinase 3) (EC 2.7.11.1) (DAP-like kinase) (Dlk) (MYPT1 kinase) (Zipper-interacting protein kinase) (ZIP-kinase)	DAPK3	0	0	0	0	10.9706	0	0	0	0	0	0	0	0	0	0	0	0	0	0	0	0	0	0	0	0	0	0	0	0	0	0	0	0	0	0	0	9.05047	0	0	0	0	0	0	10.2096	0	0	0	0
Bardet-Biedl syndrome 5 protein	BBS5	0	0	0	0	0	0	0	0	0	0	0	0	0	0	0	0	0	0	0	0	0	0	0	0	0	0	0	0	0	0	0	0	0	0	0	0	0	9.85508	0	0	0	0	0	0	0	0	0	0
Large ribosomal subunit protein mL45 (39S ribosomal protein L45, mitochondrial) (L45mt) (MRP-L45)	MRPL45	0	0	0	0	0	0	0	14.8093	0	0	9.14245	0	0	0	0	0	0	0	0	0	8.69474	0	0	0	0	0	0	0	8.48908	0	0	0	0	0	0	10.6078	0	0	0	0	0	0	0	0	0	9.58317	0	0
ADAMTS-like protein 5 (ADAMTSL-5) (Thrombospondin type-1 domain-containing protein 6)	ADAMTSL5	0	0	0	0	0	0	0	0	0	11.8017	0	0	0	0	10.2011	0	0	0	0	8.74103	0	0	0	0	0	0	0	9.13346	0	0	0	0	0	0	8.62015	0	0	0	0	9.66414	0	10.6122	0	0	7.94802	0	0	0
Poly(A)-specific ribonuclease PARN (EC 3.1.13.4) (Deadenylating nuclease) (Deadenylation nuclease) (Polyadenylate-specific ribonuclease)	PARN	0	0	0	0	0	0	0	0	0	0	0	0	0	0	0	0	0	0	0	0	10.0139	0	9.08085	0	0	10.2116	0	9.72388	0	0	0	0	0	0	0	9.48329	0	0	0	8.98215	0	0	0	0	0	9.86868	0	0
Interleukin-6 receptor subunit beta (IL-6 receptor subunit beta) (IL-6R subunit beta) (IL-6R-beta) (IL-6RB) (CDw130) (Interleukin-6 signal transducer) (Membrane glycoprotein 130) (gp130) (Oncostatin-M receptor subunit alpha) (CD antigen CD130)	IL6ST	0	0	0	0	0	0	0	0	0	9.44793	0	0	0	0	0	9.47133	0	0	0	8.70978	0	0	7.96141	0	10.074	0	0	0	0	0	0	0	0	0	0	0	9.15268	0	0	0	0	10.5035	0	9.51331	10.1859	8.68777	0	0
Extracellular sulfatase Sulf-1 (hSulf-1) (Arylsulfatase) (EC 3.1.6.1) (N-acetylglucosamine-6-sulfatase) (EC 3.1.6.14) [Cleaved into: Extracellular sulfatase Sulf-2 secreted form]	SULF1	9.03558	0	0	0	0	0	0	0	11.476	0	9.76273	0	11.7741	0	0	0	0	9.7176	0	0	0	10.0583	0	0	0	0	9.87065	10.485	8.99116	0	0	0	9.74401	0	8.78593	11.0491	0	0	0	10.8124	0	0	9.45205	0	9.69425	9.37521	9.9437	11.3999
Selenoprotein P (SeP)	SELENOP	0	0	10.7225	11.4721	12.714	10.7646	11.9872	0	0	10.5206	0	13.7943	0	12.0827	0	10.7558	9.9563	0	10.9321	10.1177	0	10.9824	11.3183	11.092	0	0	9.37972	0	0	11.2036	10.8995	10.7577	10.7998	0	11.0622	0	10.8091	10.5188	0	9.25458	10.0091	9.69224	10.4069	11.1771	9.71198	11.0997	0	0
Signal-induced proliferation-associated protein 1 (Sipa-1) (GTPase-activating protein Spa-1) (p130 SPA-1)	SIPA1	0	0	0	0	0	0	9.71205	0	0	11.6087	0	0	0	0	0	0	0	0	0	9.87062	10.2483	0	8.94437	0	0	0	0	0	8.76184	0	0	0	0	0	0	0	0	10.7182	0	9.69171	0	10.905	0	0	8.7252	10.2793	0	0
Rab11 family-interacting protein 1 (Rab11-FIP1) (Rab-coupling protein)	RAB11FIP1	0	0	0	0	7.26147	0	0	0	0	0	0	0	0	0	0	0	0	0	0	0	0	0	0	9.15265	7.28772	0	0	7.13016	8.5736	0	0	0	8.46665	0	0	0	0	0	9.69484	0	9.1793	0	0	0	6.67377	6.77023	8.86413	10.042
Aladin (Adracalin)	AAAS	0	0	0	0	0	0	0	0	0	0	0	0	0	0	0	0	0	0	0	0	0	0	0	0	0	0	0	0	0	0	0	0	0	0	8.49574	0	0	0	0	0	0	0	0	0	0	0	0	0
Integrator complex subunit 11 (Int11) (EC 3.1.27.-) (Cleavage and polyadenylation-specific factor 3-like protein) (CPSF3-like protein) (Protein related to CPSF subunits of 68 kDa) (RC-68)	INTS11	0	0	0	0	0	0	0	0	0	0	0	0	0	0	0	0	0	0	0	0	9.37799	0	9.47154	0	9.49222	10.2734	0	0	0	7.31718	8.82837	0	0	0	8.39715	0	0	0	0	10.9317	0	0	0	0	0	0	0	0
Sodium/potassium-transporting ATPase subunit alpha-3 (Na(+)/K(+) ATPase alpha-3 subunit) (EC 7.2.2.13) (Na(+)/K(+) ATPase alpha(III) subunit) (Sodium pump subunit alpha-3)	ATP1A3	9.22256	9.82994	0	7.39548	0	0	7.83927	0	0	0	8.55382	0	0	0	0	9.16564	12.8668	0	8.10629	8.64613	8.36939	8.5021	0	7.97603	0	0	0	11.0036	0	7.14429	8.64508	7.96087	0	9.25813	0	8.365	0	0	8.90945	0	0	10.4714	0	7.59006	0	0	0	0
Matrix Gla protein (MGP) (Cell growth-inhibiting gene 36 protein)	MGP	0	0	11.6687	12.2229	10.6329	11.7778	0	0	0	0	0	0	0	0	10.3493	0	0	0	12.2626	0	0	0	8.45651	11.0403	10.1656	0	0	0	0	9.38002	8.56689	9.98451	0	0	0	0	11.91	0	0	0	0	10.7947	0	0	0	0	0	0
Rho guanine nucleotide exchange factor 37	ARHGEF37	9.3187	11.2758	0	0	0	0	0	11.3778	10.4145	0	8.84395	0	10.989	0	0	9.079	0	9.74369	6.89474	8.64049	0	0	0	0	0	0	9.33306	10.9212	9.31835	0	0	0	9.28267	0	0	8.35995	0	0	0	8.65317	0	10.5547	8.98407	0	9.69317	9.42009	8.81403	10.4469
Maturin (Maturin neural progenitor differentiation regulator protein homolog) (Protein Ells1)	MTURN	0	0	0	0	9.38292	0	0	0	0	0	0	8.45372	0	10.1533	0	0	0	0	9.94406	0	0	0	0	0	0	9.33665	0	0	0	8.25881	8.95831	0	9.47935	0	0	0	0	8.93841	10.2352	0	0	0	0	8.77279	9.45906	0	0	0
SRA stem-loop-interacting RNA-binding protein, mitochondrial	SLIRP	11.164	11.0365	0	0	0	0	0	9.96529	10.173	0	0	0	9.88752	0	10.3971	8.58558	10.627	9.72285	0	0	7.90787	0	0	0	0	0	0	10.5911	0	0	0	0	8.98945	6.85123	0	9.31918	0	0	0	7.95987	9.02643	0	8.82229	0	10.0168	11.7006	7.59769	8.59028
Immunoglobulin heavy variable 3-64D	IGHV3-64D	0	0	9.49733	11.2758	11.4892	12.4242	0	0	0	0	0	11.0782	0	0	0	0	0	0	13.4067	0	0	0	11.4661	11.294	0	0	0	0	0	8.46032	11.2759	11.3527	0	0	0	0	10.6151	14.2262	0	0	0	0	0	11.9985	0	0	0	0
Lysophospholipid acyltransferase 1 (LPLAT 1) (1-acylglycerophosphocholine O-acyltransferase) (EC 2.3.1.23) (1-acylglycerophosphoethanolamine O-acyltransferase) (EC 2.3.1.n7) (1-acylglycerophosphoserine O-acyltransferase MBOAT1) (EC 2.3.1.n6) (Lysophosphatidylserine acyltransferase) (LPSAT) (Lyso-PS acyltransferase) (Membrane-bound O-acyltransferase domain-containing protein 1) (O-acyltransferase …	MBOAT1	0	0	0	0	0	0	0	0	0	0	0	0	0	0	0	0	0	10.7369	0	0	0	0	0	0	0	0	0	0	9.21392	7.92202	0	0	9.99679	0	0	0	0	0	11.9693	0	0	0	10.4902	9.59104	0	9.78838	0	12.1071
Serine/threonine-protein kinase tousled-like 2 (EC 2.7.11.1) (HsHPK) (PKU-alpha) (Tousled-like kinase 2)	TLK2	0	0	0	0	0	0	0	0	0	0	0	0	0	0	0	0	0	0	0	0	0	0	0	0	0	0	0	0	0	0	0	0	0	7.4749	8.14632	0	9.07747	0	0	0	0	0	0	0	0	0	0	0
Probable dolichyl pyrophosphate Glc1Man9GlcNAc2 alpha-1,3-glucosyltransferase (EC 2.4.1.265) (Asparagine-linked glycosylation protein 8 homolog) (Dol-P-Glc:Glc(1)Man(9)GlcNAc(2)-PP-dolichyl alpha-1,3-glucosyltransferase) (Dolichyl-P-Glc:Glc1Man9GlcNAc2-PP-dolichyl glucosyltransferase)	ALG8	0	0	0	0	0	0	0	0	0	0	0	0	0	0	0	0	0	0	0	11.4456	0	0	9.29967	0	0	0	0	0	0	0	7.758	0	0	0	11.214	0	0	10.8326	0	0	0	0	0	0	0	0	0	0
Allograft inflammatory factor 1 (AIF-1) (Ionized calcium-binding adapter molecule 1) (Protein G1)	AIF1	0	0	0	0	0	0	7.48251	0	0	0	0	0	0	8.84932	0	0	0	0	0	0	0	0	0	0	8.79583	0	0	0	0	0	0	0	0	0	9.14387	0	0	0	7.91797	7.45582	0	8.72611	0	0	0	0	0	0
TBC1 domain family member 10A (EBP50-PDX interactor of 64 kDa) (EPI64 protein) (Rab27A-GAP-alpha)	TBC1D10A	0	0	0	0	0	0	0	0	0	0	0	0	11.48	0	0	0	0	0	0	0	0	0	0	8.31759	0	0	8.29816	0	0	0	0	0	0	0	0	0	8.45794	0	0	0	0	0	9.89045	0	10.0059	10.4795	0	0
Mitochondrial import receptor subunit TOM34 (hTom34) (Translocase of outer membrane 34 kDa subunit)	TOMM34	0	10.2744	0	0	0	0	0	10.2332	9.78843	0	0	0	9.60059	0	10.8207	9.43456	0	8.28743	0	0	0	0	0	0	0	0	0	9.32796	0	0	0	0	8.53863	0	0	8.67722	0	0	0	0	0	0	7.87481	0	9.14971	0	0	0
Low density lipoprotein receptor adapter protein 1 (Autosomal recessive hypercholesterolemia protein)	LDLRAP1	0	0	0	0	0	0	0	0	0	0	0	0	0	8.5374	0	0	0	0	0	0	0	0	0	0	10.6803	0	0	0	0	0	0	7.50442	0	8.12316	0	0	0	0	0	0	0	0	0	0	0	0	0	0
Ribosome production factor 1 (Brix domain-containing protein 5) (Ribosome biogenesis protein RPF1)	RPF1	0	0	0	0	0	0	0	0	0	9.91724	0	0	0	0	9.33232	0	0	0	0	0	8.57069	0	0	0	0	9.8712	0	0	0	0	0	0	0	0	0	9.02907	0	0	9.51255	0	0	0	0	0	8.46779	0	0	0
HCLS1-associated protein X-1 (HS1-associating protein X-1) (HAX-1) (HS1-binding protein 1) (HSP1BP-1)	HAX1	0	0	0	0	0	0	0	0	0	0	0	0	0	8.98945	0	0	0	0	0	0	0	0	0	0	0	9.78383	0	0	0	9.03541	0	0	0	0	0	0	0	0	10.2326	0	9.15511	0	0	0	0	0	0	0
Myotubularin-related protein 12 (Inactive phosphatidylinositol 3-phosphatase 12) (Phosphatidylinositol 3 phosphate 3-phosphatase adapter subunit) (3-PAP) (3-phosphatase adapter protein)	MTMR12	0	0	0	7.4778	0	8.87969	0	0	0	0	0	7.07328	0	0	0	0	8.96306	0	11.6955	8.01751	0	0	9.23043	9.46014	0	7.74239	0	0	0	0	8.35217	0	0	0	0	0	9.11487	9.42619	0	9.41504	0	0	0	0	0	0	0	0
Ubiquitin thioesterase OTU1 (EC 3.4.19.12) (DUBA-8) (HIV-1-induced protease 7) (HIN-7) (HsHIN7) (OTU domain-containing protein 2)	YOD1	0	0	9.67073	9.73347	11.7752	9.96123	9.665	0	0	0	0	11.6262	0	11.2904	0	0	8.67494	0	9.49193	0	0	9.47043	9.29458	10.2537	0	0	0	0	0	8.99811	9.62217	10.0946	0	8.80597	0	0	9.69196	9.11863	0	0	0	9.32194	0	9.3689	0	0	0	0
Transcription elongation factor SPT4 (hSPT4) (DRB sensitivity-inducing factor 14 kDa subunit) (DSIF p14) (DRB sensitivity-inducing factor small subunit) (DSIF small subunit)	SUPT4H1	0	0	0	0	0	0	0	0	0	0	9.63819	0	0	0	0	8.01838	0	0	0	0	0	0	0	0	0	0	0	11.7119	0	0	0	0	8.17441	0	0	9.4513	0	0	0	8.46594	0	0	8.70262	0	9.24704	9.31561	8.59679	0
Calcium/calmodulin-dependent protein kinase type II subunit alpha (CaM kinase II subunit alpha) (CaMK-II subunit alpha) (EC 2.7.11.17)	CAMK2A	8.55693	0	9.69955	8.7325	0	7.11502	0	0	0	0	0	0	0	0	0	0	13.646	0	8.91904	0	8.28499	8.84795	0	9.35435	0	0	0	12.1536	0	7.65803	0	8.9625	0	9.90154	0	0	7.44109	11.8505	8.48817	0	0	0	0	10.457	0	0	8.8481	0
Myelin proteolipid protein (PLP) (Lipophilin)	PLP1	0	0	0	10.4694	0	0	0	0	0	0	0	0	0	8.82124	0	0	14.6076	0	9.52855	0	7.1266	9.73849	9.26025	11.2724	0	0	0	13.7543	0	7.67045	9.04882	10.3102	0	0	6.17908	0	0	7.6412	9.67295	0	0	0	0	0	0	0	0	0
Laminin subunit alpha-1 (Laminin A chain) (Laminin-1 subunit alpha) (Laminin-3 subunit alpha) (S-laminin subunit alpha) (S-LAM alpha)	LAMA1	0	0	0	0	0	0	9.32816	0	9.00112	8.37118	8.70814	0	0	10.0068	0	8.28267	0	0	7.52843	0	0	0	7.66237	0	0	0	0	0	0	0	0	0	0	7.86954	6.48025	0	0	0	0	0	0	0	0	0	0	0	0	0
START domain-containing protein 10 (StARD10) (Antigen NY-CO-28) (PCTP-like protein) (PCTP-L) (Serologically defined colon cancer antigen 28) (StAR-related lipid transfer protein 10)	STARD10	0	0	0	0	0	0	0	0	0	0	0	0	0	0	0	0	8.65835	0	0	0	0	0	0	0	0	0	0	0	8.05988	0	0	0	10.1706	0	0	0	0	0	0	0	0	0	8.72479	0	0	7.53785	0	0
Probable ATP-dependent RNA helicase DDX20 (EC 3.6.1.15) (EC 3.6.4.13) (Component of gems 3) (DEAD box protein 20) (DEAD box protein DP 103) (Gemin-3)	DDX20	0	0	10.0675	0	10.0424	0	0	0	0	0	0	0	10.8005	10.0315	11.1039	0	0	0	10.4483	0	0	0	0	10.608	0	0	0	0	11.2539	11.4716	0	0	0	10.0208	10.3883	0	0	0	9.26005	10.5982	0	11.8517	0	11.6619	0	9.86233	8.13141	9.56497
Probable ATP-dependent RNA helicase DDX47 (EC 3.6.4.13) (DEAD box protein 47)	DDX47	0	0	0	0	0	0	0	0	0	0	0	0	0	0	0	0	0	0	0	0	9.84153	0	0	0	10.3527	9.53984	0	0	0	0	0	0	0	0	0	0	0	0	0	0	8.86339	0	0	0	0	0	0	10.7618
Acyl-CoA 6-desaturase (EC 1.14.19.3) (Delta(6) fatty acid desaturase) (D6D) (Delta(6) desaturase) (Delta-6 desaturase) (Fatty acid desaturase 2)	FADS2	10.7137	9.983	0	0	0	0	0	0	0	0	0	9.80696	0	0	10.5927	0	8.90408	0	0	0	0	0	0	0	0	8.92377	8.83145	9.73237	0	0	0	0	8.88384	0	0	9.86645	0	0	0	0	0	0	0	0	0	0	0	0
Forkhead box protein K1 (Myocyte nuclear factor) (MNF)	FOXK1	9.07853	0	0	0	0	0	0	0	0	0	0	0	9.95458	0	10.0019	8.65497	0	0	0	0	0	0	0	0	0	0	8.85802	11.6044	0	0	0	0	0	0	0	10.1198	0	0	9.74291	0	0	0	7.64598	0	9.38958	10.6335	9.47128	10.3524
Spliceosome-associated protein CWC15 homolog	CWC15	9.39269	9.35649	0	0	0	0	0	9.87976	9.128	0	9.34879	0	0	0	9.64283	7.8111	7.99742	9.34574	0	0	8.13669	0	0	0	9.6534	7.65048	0	9.478	7.95226	0	0	0	10.442	0	0	10.1864	0	0	9.15931	0	0	8.54389	9.95864	0	9.77966	8.80675	8.85178	10.1523
Nucleotide sugar transporter SLC35B4 (Solute carrier family 35 member B4) (UDP-xylose and UDP-N-acetylglucosamine transporter) (YEA4 homolog)	SLC35B4	0	0	0	0	7.63475	8.32887	0	0	0	0	0	0	0	8.8885	0	0	0	0	0	0	0	0	7.9229	7.92059	0	8.04959	0	0	0	8.78905	8.15376	8.47726	0	0	0	0	9.40052	7.77521	0	0	0	0	0	0	0	0	0	0
Integrin alpha-L (CD11 antigen-like family member A) (Leukocyte adhesion glycoprotein LFA-1 alpha chain) (LFA-1A) (Leukocyte function-associated molecule 1 alpha chain) (CD antigen CD11a)	ITGAL	0	0	8.94902	8.48809	0	0	0	0	0	0	0	0	0	0	0	0	0	0	9.68811	0	0	0	0	0	0	0	0	0	0	0	0	0	0	0	9.70639	0	0	0	0	9.14435	0	10.2547	0	0	0	0	0	0
Small ribosomal subunit protein uS17m (28S ribosomal protein S17, mitochondrial) (MRP-S17) (S17mt)	MRPS17	0	0	0	0	0	0	0	0	8.40279	0	0	0	8.48488	0	8.85537	0	0	8.82529	0	0	10.6611	0	0	0	0	8.4218	0	8.99642	0	0	0	0	0	0	0	10.1778	0	0	0	0	8.33742	0	0	0	8.71735	0	0	0
Mast cell carboxypeptidase A (MC-CPA) (EC 3.4.17.1) (Carboxypeptidase A3)	CPA3	0	0	10.8397	10.3871	10.7644	11.2807	9.95773	0	0	0	0	0	0	0	7.37655	10.3454	0	0	10.5897	0	0	0	11.8474	8.04784	0	0	0	0	9.61402	11.0909	10.3678	10.0604	7.92832	8.10751	6.71983	0	7.02898	0	12.4485	6.94193	0	0	7.57174	9.70544	10.1302	9.33305	0	7.65423
Zinc finger CCHC domain-containing protein 3	ZCCHC3	0	0	0	0	0	0	0	0	0	0	8.93613	0	0	0	0	0	0	0	0	0	8.47501	0	0	0	0	0	0	0	0	0	0	0	0	8.51433	0	0	0	0	10.6538	0	0	0	0	0	0	0	0	0
Apolipoprotein(a) (Apo(a)) (Lp(a)) (EC 3.4.21.-)	LPA	0	0	9.04797	8.81336	13.352	8.35128	8.54069	0	0	9.60223	0	9.95858	0	8.41623	0	10.8644	9.75365	0	10.3738	0	0	10.2746	9.94734	11.3913	0	0	0	0	0	8.56212	9.10633	10.6611	0	9.50411	10.864	0	8.95498	0	0	9.90834	0	0	0	10.5134	0	0	0	0
17-beta-hydroxysteroid dehydrogenase type 2 (17-beta-HSD 2) (20 alpha-hydroxysteroid dehydrogenase) (20-alpha-HSD) (E2DH) (Estradiol 17-beta-dehydrogenase 2) (EC 1.1.1.62) (Microsomal 17-beta-hydroxysteroid dehydrogenase) (Short chain dehydrogenase/reductase family 9C member 2) (Testosterone 17-beta-dehydrogenase) (EC 1.1.1.239)	HSD17B2	0	0	0	0	7.87519	6.95329	0	0	0	0	6.89637	0	10.9542	0	0	0	0	0	0	0	9.68752	7.56896	0	8.52963	9.16303	7.93769	0	8.9457	7.28235	0	0	7.3157	0	0	8.37648	0	0	7.99035	0	6.29633	0	8.18292	7.31317	8.90778	0	0	0	0
Arf-GAP with dual PH domain-containing protein 1 (Centaurin-alpha-1) (Cnt-a1) (Putative MAPK-activating protein PM25)	ADAP1	0	0	8.9992	8.75634	0	9.07831	0	0	9.51355	8.62542	0	0	0	0	0	0	9.90076	0	8.86576	0	0	0	0	0	0	0	0	0	0	9.21849	8.77787	8.37518	0	0	8.93181	0	9.47916	8.57092	0	0	9.31348	8.98011	0	8.57672	0	0	0	0
Cathepsin F (CATSF) (EC 3.4.22.41)	CTSF	0	0	9.99745	0	0	0	0	0	0	0	0	0	0	0	0	0	0	0	9.04488	0	0	0	8.95656	0	0	0	0	0	0	0	9.84077	0	0	0	8.21548	0	0	0	0	0	0	0	0	12.4423	0	0	0	0
Desmocollin-3 (Cadherin family member 3) (Desmocollin-4) (HT-CP)	DSC3	12.9227	0	0	0	0	0	0	0	9.1134	10.2201	9.93529	0	0	0	0	0	0	0	0	10.7824	0	0	0	0	0	0	0	0	0	0	0	0	0	0	0	0	6.71247	0	10.1958	7.26924	0	9.45556	0	7.94821	0	8.04447	0	0
Transforming growth factor beta-1-induced transcript 1 protein (Androgen receptor coactivator 55 kDa protein) (Androgen receptor-associated protein of 55 kDa) (Hydrogen peroxide-inducible clone 5 protein) (Hic-5)	TGFB1I1	0	0	10.2828	9.10441	0	8.52974	8.68193	0	0	0	0	0	8.27674	10.7147	9.56099	0	0	0	8.34901	0	0	0	9.64373	8.14493	0	0	0	8.49496	0	8.85319	10.3169	9.1819	8.44309	0	0	0	11.2544	0	0	0	0	0	0	10.0995	0	0	0	9.32499
Nucleoporin NDC1 (hNDC1) (Transmembrane protein 48)	NDC1	0	0	0	0	0	0	0	0	0	0	0	0	0	0	0	0	0	0	0	0	0	0	9.37774	0	0	0	0	0	0	0	0	0	0	0	0	0	0	0	0	0	0	0	0	0	0	0	8.27104	0
High mobility group nucleosome-binding domain-containing protein 3 (Thyroid receptor-interacting protein 7) (TR-interacting protein 7) (TRIP-7)	HMGN3	0	12.091	0	0	0	0	0	11.2421	11.546	0	0	0	0	5.87626	10.2478	0	6.6734	9.72318	0	0	0	0	0	7.79362	0	0	8.57732	0	8.86076	0	0	0	0	0	0	0	0	0	0	0	0	0	0	0	0	8.94692	0	12.8022
Microsomal glutathione S-transferase 2 (Microsomal GST-2) (EC 2.5.1.18) (Glutathione peroxidase MGST2) (EC 1.11.1.-) (Leukotriene C4 synthase MGST2) (EC 4.4.1.20) (Microsomal glutathione S-transferase II) (Microsomal GST-II)	MGST2	0	0	10.2647	0	0	12.3495	0	0	0	0	0	0	12.6485	10.6751	0	0	0	0	12.2213	10.1297	11.8717	0	10.9451	11.0877	11.9813	0	10.8059	0	0	0	10.6292	11.4509	0	11.4952	10.5244	11.5783	11.554	0	11.7981	13.2649	11.7396	0	0	0	10.7302	9.47853	12.1246	0
Replication termination factor 2 (RTF2) (Replication termination factor 2 domain-containing protein 1)	RTF2	0	10.2435	0	0	0	0	0	10.3472	9.19274	0	8.83459	0	0	0	0	0	0	0	0	0	8.5736	0	0	0	0	0	0	0	0	0	0	0	0	0	0	0	0	0	9.79617	6.7717	0	9.93375	0	0	0	0	8.41532	11.0376
Ciliary neurotrophic factor receptor subunit alpha (CNTF receptor subunit alpha) (CNTFR-alpha)	CNTFR	0	9.46039	9.13762	0	9.29905	8.6371	0	8.30451	0	0	0	8.52741	0	0	0	8.78928	10.5242	0	9.00271	0	0	8.60782	10.3595	9.94081	9.23478	0	10.0757	9.19172	0	10.0631	9.11465	10.4667	0	0	0	0	0	9.50001	0	7.21567	9.89023	8.4696	0	9.39189	0	0	0	9.5433
Membrane-associated guanylate kinase, WW and PDZ domain-containing protein 2 (Atrophin-1-interacting protein 1) (AIP-1) (Atrophin-1-interacting protein A) (Membrane-associated guanylate kinase inverted 2) (MAGI-2)	MAGI2	0	0	0	0	0	0	0	0	0	0	0	0	0	0	0	0	0	0	0	0	0	0	0	0	0	0	8.7114	0	0	0	0	0	0	0	0	0	0	0	0	0	0	0	0	0	0	0	0	0
Hemoglobin subunit zeta (HBAZ) (Hemoglobin zeta chain) (Zeta-globin)	HBZ	0	10.7555	9.01938	10.8302	9.553	10.0069	0	0	0	0	0	8.28553	0	11.8474	0	0	0	7.88118	9.40248	0	0	0	7.59425	7.21069	0	0	0	10.9329	0	0	9.42861	8.41878	0	9.21197	8.80522	8.14651	0	0	0	8.01762	10.8074	0	0	0	0	0	0	0
Protein kinase C beta type (PKC-B) (PKC-beta) (EC 2.7.11.13)	PRKCB	0	0	0	8.75811	0	9.75469	0	11.0644	10.6873	0	0	0	9.80047	8.33549	0	9.82154	11.4077	0	0	0	9.30277	0	8.74154	9.20554	9.27949	0	7.41733	12.6191	0	8.33205	9.42847	9.56969	0	0	0	0	9.16546	9.01487	0	7.81354	0	0	8.80946	0	8.27545	0	0	0
CKLF-like MARVEL transmembrane domain-containing protein 4 (Chemokine-like factor superfamily member 4)	CMTM4	0	0	0	0	8.18966	0	9.28093	0	0	0	0	0	0	0	0	0	9.39818	0	0	0	0	0	0	0	9.16298	0	8.35892	0	0	0	8.25812	0	0	0	0	0	0	9.83833	0	0	9.72613	0	0	0	0	0	0	0
Ribosomal protein eL22-like (60S ribosomal protein L22-like 1) (Large ribosomal subunit protein eL22-like 1)	RPL22L1	0	0	0	0	0	0	0	8.39639	8.26849	0	9.78411	8.2882	0	0	0	0	0	0	0	0	9.63104	7.63316	0	0	8.04366	8.75226	0	8.68799	0	9.32729	0	0	0	0	8.66716	0	0	0	0	0	0	0	0	0	0	0	0	10.617
CKLF-like MARVEL transmembrane domain-containing protein 6 (Chemokine-like factor superfamily member 6)	CMTM6	0	0	0	8.60912	12.7243	0	0	0	0	0	0	0	0	8.16107	0	0	0	0	10.5011	0	0	0	0	0	0	0	0	0	0	0	8.56083	0	0	0	0	0	0	0	0	10.3877	0	0	0	0	0	0	0	0
NFU1 iron-sulfur cluster scaffold homolog, mitochondrial (HIRA-interacting protein 5)	NFU1	0	0	0	0	0	0	0	0	0	0	0	0	0	0	0	0	0	9.80214	0	0	0	0	0	0	0	0	0	0	10.0783	0	0	0	0	10.0898	0	10.1371	0	0	0	0	0	0	0	0	0	0	0	0
Copine-8 (Copine VIII)	CPNE8	0	0	0	0	0	0	0	0	0	0	0	0	0	0	0	8.05247	0	0	0	0	0	0	0	0	0	0	0	10.2034	9.57528	0	0	0	9.35331	0	0	0	0	0	0	0	8.8103	10.0266	0	0	0	0	0	11.4707
Desmin	DES	0	0	10.4381	0	0	0	0	0	0	0	8.92518	0	12.1133	13.3876	10.3487	0	0	0	0	0	0	9.7018	10.9616	7.60278	0	0	0	10.4316	10.0769	8.18667	11.0969	8.18217	15.9471	15.2927	0	0	8.82064	0	0	0	0	9.37314	8.96531	10.8379	12.6652	0	13.2358	0
Carboxypeptidase Z (CPZ) (EC 3.4.17.-)	CPZ	0	0	11.09	9.83106	0	11.4497	10.345	0	0	11.199	0	0	0	0	10.401	0	0	0	11.3095	0	0	9.1394	8.97013	11.5117	0	0	0	0	9.42098	8.82929	11.4269	8.77208	0	0	8.95469	0	8.9346	0	0	0	8.50912	8.95197	0	9.58515	0	0	0	0
A-kinase anchor protein 7 isoforms alpha and beta (AKAP-7 isoforms alpha and beta) (A-kinase anchor protein 18 kDa) (AKAP 18) (Protein kinase A-anchoring protein 7 isoforms alpha/beta) (PRKA7 isoforms alpha/beta)	AKAP7	0	0	0	0	0	0	0	0	0	0	0	0	0	0	8.41702	11.0856	9.26098	0	0	0	0	0	0	0	0	9.31998	6.21962	9.59522	7.9678	9.02723	0	0	0	0	0	0	0	11.2881	0	0	0	0	7.93075	0	9.50957	0	0	0
Calmodulin-regulated spectrin-associated protein 2 (Calmodulin-regulated spectrin-associated protein 1-like protein 1)	CAMSAP2	0	0	0	0	0	0	0	0	0	0	7.76142	0	0	0	0	0	8.45873	0	0	0	0	0	0	0	0	0	0	0	0	0	0	0	0	0	0	0	0	0	0	0	0	0	0	0	0	0	0	0
Charged multivesicular body protein 4a (Chromatin-modifying protein 4a) (CHMP4a) (SNF7 homolog associated with Alix-2) (SNF7-1) (hSnf-1) (Vacuolar protein sorting-associated protein 32-1) (Vps32-1) (hVps32-1)	CHMP4A	0	0	0	0	7.35463	0	9.80771	0	0	0	0	0	0	0	0	0	0	0	9.03014	0	9.02878	0	8.21244	0	8.58666	0	0	8.47902	0	0	0	8.8134	0	0	7.54843	0	0	7.32165	8.90877	8.65321	8.65898	8.56839	0	8.44416	0	0	9.0757	9.46147
Aggrecan core protein (Cartilage-specific proteoglycan core protein) (CSPCP) (Chondroitin sulfate proteoglycan core protein 1) (Chondroitin sulfate proteoglycan 1) [Cleaved into: Aggrecan core protein 2]	ACAN	0	0	11.0853	10.3986	13.0015	13.5779	13.8913	0	0	8.83751	8.42357	0	0	0	10.0896	10.0182	10.4506	0	13.0957	0	0	0	11.8505	13.0818	0	0	0	0	0	13.1771	12.2854	11.5325	0	8.38409	0	8.06307	0	0	0	0	0	8.43999	0	12.2293	0	0	0	0
Retrotransposon Gag-like protein 8C (Mammalian retrotransposon derived protein 8C)	RTL8C	0	10.7271	0	0	0	0	0	10.6549	11.5581	0	7.80364	0	9.84608	0	9.98096	0	8.44575	9.29745	0	0	0	0	0	0	0	0	8.02333	0	9.36989	0	0	0	8.43521	0	0	9.21132	0	0	0	0	0	0	8.78338	0	0	8.95293	7.18975	11.3447
ADP/ATP translocase 3 (ADP,ATP carrier protein 3) (ADP,ATP carrier protein, isoform T2) (ANT 2) (Adenine nucleotide translocator 3) (ANT 3) (Solute carrier family 25 member 6) [Cleaved into: ADP/ATP translocase 3, N-terminally processed]	SLC25A6	0	10.4133	7.35209	8.18999	9.8833	0	0	9.76586	10.1789	0	11.7392	0	10.0194	5.285	10.0966	10.2629	0	0	7.82037	10.4303	9.48428	0	0	9.19834	10.9745	0	9.26248	10.798	10.5499	10.2803	0	0	12.6241	7.06947	10.1753	12.3592	7.75825	0	0	6.08447	10.7377	0	0	0	12.6077	11.1062	7.65875	0
Baculoviral IAP repeat-containing protein 1 (Neuronal apoptosis inhibitory protein)	NAIP	0	0	0	0	0	0	0	0	0	0	0	0	0	0	0	0	0	0	0	0	0	0	0	0	0	0	0	0	0	0	8.66709	8.06532	0	0	0	0	0	0	0	0	0	0	0	0	0	0	0	0
COMM domain-containing protein 5 (Hypertension-related calcium-regulated gene protein) (HCaRG)	COMMD5	0	0	8.35907	0	0	0	0	0	0	0	0	0	0	0	0	0	0	0	0	0	0	0	0	0	0	0	10.6477	0	0	0	0	0	0	7.78263	0	0	0	0	0	0	0	0	0	0	0	0	0	0
Son of sevenless homolog 1 (SOS-1)	SOS1	0	0	0	0	0	0	0	0	0	0	0	0	0	0	0	0	0	0	0	0	0	0	0	0	0	0	0	0	0	0	0	0	0	0	0	0	0	0	0	0	0	11.9536	0	0	0	0	0	0
Immunoglobulin kappa variable 1-39 (Ig kappa chain V-I region DEE) (Ig kappa chain V-I region Hau) (Ig kappa chain V-I region Mev) (Ig kappa chain V-I region OU) (Ig kappa chain V-I region Walker)	IGKV1-39	0	0	0	9.35979	0	0	0	0	0	0	0	0	0	9.25353	0	0	0	0	11.2391	0	0	0	8.91284	10.7285	0	0	9.14293	0	0	0	8.0255	9.33859	0	9.16552	0	0	0	0	0	0	0	0	0	0	0	0	0	12.2083
Muscleblind-like protein 2 (Muscleblind-like protein 1) (Muscleblind-like protein-like) (Muscleblind-like protein-like 39)	MBNL2	0	0	0	0	0	6.77369	0	0	10.5322	0	8.72864	0	10.9418	0	10.3006	0	0	9.39982	0	9.23991	0	0	0	0	0	0	0	10.4486	0	0	0	0	8.70065	0	0	0	8.611	0	0	0	0	0	9.55484	0	9.50849	9.45757	7.87839	10.2261
RELT-like protein 1	RELL1	0	0	0	0	0	0	0	10.9774	0	0	0	0	11.2517	0	0	9.90597	8.84347	10.0784	0	0	8.53797	0	0	0	0	0	0	10.1468	8.4741	0	0	0	10.0224	0	0	9.4003	0	0	0	0	0	0	10.6739	0	0	0	0	10.0198
Scavenger receptor class A member 3 (Cellular stress response gene protein)	SCARA3	0	0	0	0	8.59388	9.53299	0	0	0	8.29997	0	0	0	0	0	0	0	0	0	8.38274	0	0	0	0	9.00548	9.55959	0	0	0	7.86953	0	0	0	0	7.87513	0	0	8.12824	7.57284	0	8.35408	8.64921	0	0	0	0	0	0
Keratin, type II cytoskeletal 5 (58 kDa cytokeratin) (Cytokeratin-5) (CK-5) (Keratin-5) (K5) (Type-II keratin Kb5)	KRT5	0	0	0	9.00475	9.05987	9.16078	8.43901	0	0	10.1725	12.2684	10.2097	0	0	0	0	0	0	0	7.39596	11.2674	10.2532	10.6525	0	9.40452	10.0952	0	0	9.49959	5.84241	10.0504	0	0	0	8.91034	0	0	9.98645	10.7846	0	10.1335	10.6978	0	8.35657	0	9.35721	0	0
Ubiquitin carboxyl-terminal hydrolase MINDY-3 (EC 3.4.19.12) (Dermal papilla-derived protein 5) (Deubiquitinating enzyme MINDY-3) (Protein CARP)	MINDY3	0	0	0	9.21432	10.6227	9.88527	0	0	0	0	0	9.38236	0	9.6643	0	0	0	0	0	0	0	10.225	9.62742	9.98856	0	0	0	0	0	8.68177	9.8558	10.3322	0	10.3371	0	0	0	10.0449	0	0	10.7436	10.0028	0	10.2616	0	0	0	0
Transmembrane protein 256	TMEM256	10.632	0	0	0	0	0	0	14.9314	13.6778	0	11.0908	0	0	0	13.5856	9.11995	10.6227	10.5512	7.98016	0	0	0	0	0	0	0	0	0	9.89919	0	0	8.87341	9.92115	9.44434	0	9.66121	10.101	0	0	0	0	0	8.74488	0	9.76656	10.8142	9.1916	13.2382
Polymerase delta-interacting protein 3 (46 kDa DNA polymerase delta interaction protein) (p46) (S6K1 Aly/REF-like target) (SKAR)	POLDIP3	9.69164	10.1416	0	0	0	0	0	10.4655	9.87771	0	9.1158	0	9.91545	0	10.9773	7.83476	0	9.24964	0	0	0	0	0	0	0	0	0	9.47604	0	0	0	0	9.27196	0	0	8.99448	0	0	0	0	9.13075	0	9.06448	0	9.67829	9.59809	8.28371	10.014
Protein YIPF3 (Killer lineage protein 1) (Natural killer cell-specific antigen KLIP1) (YIP1 family member 3) [Cleaved into: Protein YIPF3, 36 kDa form III]	YIPF3	0	0	0	0	0	0	0	0	0	9.71792	0	7.94016	8.99515	0	0	0	7.34042	0	0	9.57413	0	0	8.68714	0	11.0776	9.87477	9.34365	0	8.47967	9.32851	11.2896	0	0	0	7.9761	10.1389	0	10.8053	9.86884	10.6514	0	10.2159	0	9.86877	0	7.79622	0	0
Alpha-L-iduronidase (EC 3.2.1.76)	IDUA	0	0	0	0	0	0	0	0	0	0	0	0	0	0	10.6316	0	0	0	0	0	0	0	8.85563	0	10.2961	10.1036	8.73152	9.51168	0	9.22258	0	0	0	0	0	0	8.29685	0	0	0	10.5792	0	0	0	0	0	8.97968	0
Zinc finger FYVE domain-containing protein 21 (ZF21)	ZFYVE21	0	10.5205	0	0	0	0	0	0	10.146	0	10.5331	0	10.811	0	9.82207	0	11.3202	10.6452	0	6.35404	12.4516	0	0	0	10.3152	10.6514	10.6312	9.66679	10.5621	6.94588	9.76335	0	10.6983	0	0	0	0	0	9.49589	0	10.8145	9.04508	10.2883	10.0407	10.2861	11.0363	9.60746	10.5929
Zinc finger CCCH domain-containing protein 7B (Rotavirus 'X'-associated non-structural protein) (RoXaN)	ZC3H7B	0	0	0	0	0	0	0	0	0	0	0	0	0	0	0	0	0	0	0	8.08112	0	0	0	0	0	10.5133	0	0	0	8.45041	0	0	0	10.2845	8.20829	0	8.93218	0	0	9.79954	0	0	0	0	0	0	0	0
Actin-binding LIM protein 1 (abLIM-1) (Actin-binding LIM protein family member 1) (Actin-binding double zinc finger protein) (LIMAB1) (Limatin)	ABLIM1	8.82638	10.584	0	0	0	0	0	11.337	10.5503	0	9.41592	0	13.3538	0	10.3659	8.75792	9.16124	11.1193	0	0	6.60116	0	7.68151	0	0	0	10.9588	12.1885	11.1999	0	0	0	10.2135	0	0	9.81477	6.91896	0	0	0	0	0	10.458	0	10.9739	12.3749	9.39658	11.8302
Integrator complex subunit 6 (Int6) (DBI-1) (Protein DDX26) (Protein deleted in cancer 1) (DICE1)	INTS6	0	0	0	0	7.84072	0	0	0	0	0	0	0	0	10.8233	0	0	0	0	0	8.51375	0	8.14813	0	0	8.40199	7.36433	0	0	0	7.71104	0	0	0	0	0	0	0	8.06493	0	0	10.2315	9.60941	0	0	0	0	0	0
Atypical kinase COQ8A, mitochondrial (EC 2.7.-.-) (Chaperone activity of bc1 complex-like) (Chaperone-ABC1-like) (Coenzyme Q protein 8A) (aarF domain-containing protein kinase 3)	COQ8A	0	0	0	0	0	0	0	0	0	0	0	0	0	0	0	0	7.84695	0	0	0	0	0	0	0	0	0	0	0	0	0	0	0	0	10.2026	0	0	0	0	0	0	0	0	0	0	0	0	0	0
Ras-related protein Rab-27B (EC 3.6.5.2) (C25KG)	RAB27B	0	0	0	8.96013	10.2496	9.41886	0	0	0	0	0	0	0	12.0819	0	9.78878	12.0377	0	9.20378	0	0	0	9.71521	0	0	0	0	8.42956	0	0	0	10.676	0	8.96056	0	9.44061	8.78666	0	9.30049	0	0	9.32418	0	8.83014	8.54697	10.4322	0	12.4538
Zinc finger FYVE domain-containing protein 16 (Endofin) (Endosome-associated FYVE domain protein)	ZFYVE16	0	0	0	0	0	0	0	0	0	0	0	0	0	0	0	0	0	0	0	0	0	0	0	0	0	0	0	0	0	0	0	0	0	0	0	7.73443	0	0	0	0	0	0	0	0	0	7.962	0	0
E3 ubiquitin-protein ligase AMFR (EC 2.3.2.36) (Autocrine motility factor receptor) (AMF receptor) (RING finger protein 45) (gp78)	AMFR	0	0	0	0	0	0	0	0	0	0	0	0	0	0	0	8.59906	0	0	0	0	0	0	0	8.34035	8.59141	8.74313	0	0	0	0	8.93893	0	0	0	8.71258	0	0	9.62553	0	0	0	8.19364	0	0	0	0	0	9.31339
Sperm-associated antigen 7	SPAG7	0	8.68267	0	0	0	0	0	8.57082	8.84049	0	8.73486	0	0	0	0	0	0	0	0	0	9.392	0	0	0	10.0408	0	0	0	0	0	0	0	8.79698	0	0	9.28649	0	0	9.79911	7.47358	0	0	9.25176	0	0	9.38315	8.60118	9.41903
Periplakin (190 kDa paraneoplastic pemphigus antigen) (195 kDa cornified envelope precursor protein)	PPL	7.84597	0	0	0	0	0	0	10.193	0	7.89046	9.41644	0	0	0	9.9802	0	0	10.5979	0	6.88441	0	8.26304	10.4823	0	0	7.40516	0	9.52813	0	0	0	0	9.14153	0	8.3454	8.57802	0	0	9.28858	8.46008	0	8.50598	8.18864	0	10.248	10.7463	9.42355	0
RNA polymerase-associated protein CTR9 homolog (SH2 domain-binding protein 1)	CTR9	0	0	0	0	0	0	0	0	0	0	8.53634	0	11.0678	0	10.9343	0	0	0	0	0	8.92818	0	0	0	0	0	0	0	0	0	0	0	10.0032	0	9.65953	9.51547	0	0	9.88714	0	11.1384	0	9.74672	0	0	0	0	9.93729
CCR4-NOT transcription complex subunit 7 (EC 3.1.13.4) (BTG1-binding factor 1) (CCR4-associated factor 1) (CAF-1) (Caf1a)	CNOT7	0	0	0	0	0	11.6268	0	0	0	0	0	0	0	0	0	0	0	0	0	0	0	0	0	0	0	0	0	0	0	0	0	0	0	0	7.33545	0	7.86955	0	0	0	0	0	0	0	0	0	0	0
Immediate early response 3-interacting protein 1	IER3IP1	0	0	0	0	0	0	0	0	0	0	0	0	0	0	0	0	0	0	0	0	0	0	0	0	0	0	0	0	0	0	0	0	0	0	0	0	0	0	0	0	0	0	0	0	0	0	0	0
Myelin P2 protein (Peripheral myelin protein 2)	PMP2	0	0	12.4455	10.6533	10.4913	11.671	13.0784	0	0	11.0022	0	0	0	11.7318	0	0	10.5029	0	13.8066	0	9.34673	0	15.0132	12.8736	10.904	0	0	10.1727	0	10.644	9.62477	13.3805	0	10.37	9.3115	0	0	10.5567	10.4478	9.81668	8.12925	10.3671	0	11.6763	8.37113	0	0	7.63821
3-keto-steroid reductase/17-beta-hydroxysteroid dehydrogenase 7 (17-beta-hydroxysteroid dehydrogenase 7) (17-beta-HSD 7) (3-keto-steroid reductase) (EC 1.1.1.270) (Dihydrotestosterone oxidoreductase) (EC 1.1.1.210) (Estradiol 17-beta-dehydrogenase 7) (EC 1.1.1.62) (Short chain dehydrogenase/reductase family 37C member 1)	HSD17B7	0	0	0	0	0	0	0	0	0	0	0	0	0	0	0	8.90292	0	0	0	0	0	0	0	0	0	0	0	0	0	0	0	0	0	0	0	0	0	0	0	0	0	0	0	0	0	0	0	0
Interferon-induced 35 kDa protein (IFP 35) (Ifi-35)	IFI35	0	0	0	0	0	0	0	0	0	0	0	0	0	9.30565	0	8.00248	0	0	0	0	0	0	0	0	0	0	0	10.6013	0	0	0	0	0	0	8.51377	0	0	0	0	0	0	0	0	0	8.81611	0	0	10.1757
ETS-related transcription factor Elf-1 (E74-like factor 1)	ELF1	0	0	0	0	0	0	0	0	0	0	0	0	0	0	0	0	0	0	0	0	0	0	0	0	0	0	0	0	0	0	0	0	0	0	0	0	0	0	0	0	0	0	0	0	0	0	0	0
DNA methyltransferase 1-associated protein 1 (DNMAP1) (DNMT1-associated protein 1)	DMAP1	0	0	0	0	0	0	0	0	0	9.07057	0	0	0	0	0	0	0	0	0	0	8.4603	0	0	0	9.65243	9.11691	7.96848	0	0	0	0	0	0	0	0	0	0	0	10.0795	0	0	9.04848	0	0	0	0	8.4015	10.32
Cyclic AMP-dependent transcription factor ATF-1 (cAMP-dependent transcription factor ATF-1) (Activating transcription factor 1) (Protein TREB36)	ATF1	0	10.9861	9.02374	0	0	0	8.67653	0	0	9.7344	0	0	0	8.62045	0	0	0	0	0	9.94044	10.7325	9.7385	0	0	10.8113	10.3938	0	0	0	8.8825	8.41519	0	0	0	0	0	0	9.7388	10.4046	10.7942	9.61719	9.22823	0	9.33255	0	0	0	0
CCR4-NOT transcription complex subunit 9 (Cell differentiation protein RQCD1 homolog) (Rcd-1)	CNOT9	6.91145	0	0	0	0	0	0	0	0	0	8.03622	0	10.7396	0	11.1416	6.51346	0	0	0	0	0	0	0	0	0	0	8.86389	10.6454	0	0	0	0	8.79824	6.94718	0	8.69423	0	0	0	0	0	0	9.64153	0	8.49173	11.4463	7.48047	0
Protein LSM14 homolog B (RNA-associated protein 55B) (hRAP55B)	LSM14B	0	0	0	0	0	0	0	0	0	0	0	0	0	0	0	0	0	0	0	7.10999	0	0	0	0	9.28073	0	0	0	0	0	0	0	0	0	0	0	0	0	9.07804	9.0865	8.69258	0	0	0	0	8.40978	0	0
Limbic system-associated membrane protein (LSAMP) (IgLON family member 3)	LSAMP	8.02421	9.73117	0	6.95919	8.24207	0	7.39081	6.08061	7.30454	8.01684	0	0	0	10.043	0	9.7232	13.9454	0	8.08165	0	0	7.41907	8.91781	8.47569	8.51216	0	0	10.094	11.5892	0	7.71124	9.48842	7.41376	0	0	0	7.44678	7.00634	8.80074	7.91299	0	0	11.079	7.15297	0	0	0	0
D-2-hydroxyglutarate dehydrogenase, mitochondrial (EC 1.1.99.39)	D2HGDH	0	0	0	0	0	0	0	0	0	9.13703	0	0	0	0	0	0	9.33319	0	0	0	0	0	0	0	0	7.33692	0	0	0	7.17936	0	0	9.76872	10.7554	0	0	0	7.81266	8.02713	0	0	8.89835	0	8.11703	0	0	0	0
Transmembrane protein 119 (Osteoblast induction factor) (OBIF)	TMEM119	0	0	10.1061	9.09024	11.1535	10.3962	10.6957	0	0	9.11458	0	0	9.99837	10.0399	0	0	0	0	11.4476	0	0	0	10.4046	10.4036	9.91486	0	11.4805	0	0	11.0309	10.7779	10.6682	0	7.80238	0	0	0	9.52998	8.51768	8.86363	11.4025	9.60985	0	9.7884	0	0	0	10.5825
Protein phosphatase 1 regulatory subunit 12B (Myosin phosphatase-targeting subunit 2) (Myosin phosphatase target subunit 2)	PPP1R12B	0	0	0	0	0	0	0	0	9.53988	9.78858	8.88852	0	0	0	0	0	9.01839	0	0	0	7.77374	0	0	0	10.2002	0	9.3392	0	8.73049	0	0	0	0	9.62071	0	0	0	7.89813	0	7.21088	8.54874	0	0	0	0	0	8.06928	0
ATP synthase subunit s, mitochondrial (ATP synthase-coupling factor B) (FB) (Distal membrane arm assembly complex 2-like protein) (Mitochondrial ATP synthase regulatory component factor B)	DMAC2L	0	0	0	0	0	0	0	0	0	0	8.23158	0	0	0	0	0	0	0	8.78681	0	0	0	0	0	0	0	0	9.79509	0	0	0	0	0	10.0706	0	0	0	0	0	8.84324	0	0	0	0	0	0	0	0
NFATC2-interacting protein (45 kDa NF-AT-interacting protein) (45 kDa NFAT-interacting protein) (Nuclear factor of activated T-cells, cytoplasmic 2-interacting protein)	NFATC2IP	0	0	0	0	0	0	0	0	0	0	0	0	0	0	0	0	0	0	0	0	10.6917	0	0	0	0	8.65004	0	0	0	7.79762	0	0	0	0	0	0	0	0	0	0	0	0	0	0	0	0	0	8.69759
Dolichyldiphosphatase 1 (EC 3.6.1.43) (Dolichyl pyrophosphate phosphatase 1)	DOLPP1	0	0	0	0	0	0	0	0	0	0	0	0	0	8.58477	0	0	0	0	0	0	0	0	0	0	0	0	0	0	0	0	0	0	0	8.58182	0	0	0	0	0	0	0	0	0	0	0	0	0	0
Sideroflexin-2	SFXN2	0	0	0	0	0	0	0	0	0	0	0	0	9.3322	0	0	0	0	0	0	0	0	0	0	0	0	0	0	9.20064	0	0	0	0	0	0	0	0	0	0	0	0	0	0	0	0	0	0	0	0
DNA-directed RNA polymerase III subunit RPC5 (RNA polymerase III subunit C5) (DNA-directed RNA polymerase III 80 kDa polypeptide)	POLR3E	0	0	0	0	0	0	0	0	11.8004	0	0	0	0	0	0	0	0	7.56251	0	0	0	0	0	0	0	0	0	0	0	0	0	0	7.87654	0	0	7.22794	0	0	0	0	0	0	7.8748	0	7.57068	0	6.85364	0
tRNA-dihydrouridine(47) synthase [NAD(P)(+)]-like (EC 1.3.1.89) (mRNA-dihydrouridine synthase DUS3L) (EC 1.3.1.-) (tRNA-dihydrouridine synthase 3-like)	DUS3L	0	0	0	0	0	10.5844	0	0	0	0	0	0	0	0	0	0	0	0	0	0	0	0	0	0	0	0	0	0	0	0	0	0	0	0	0	0	10.7723	0	0	0	0	0	0	0	0	0	0	0
FUN14 domain-containing protein 1	FUNDC1	0	0	0	0	9.5377	0	0	0	0	0	0	6.92467	0	0	0	0	10.122	0	0	0	10.2964	0	0	0	9.38256	0	0	0	0	0	0	0	0	0	0	0	0	0	0	0	0	0	0	0	0	0	0	10.8558
Integral membrane protein 2A (Protein E25)	ITM2A	0	0	0	0	0	0	0	0	0	0	0	9.0726	11.3017	0	0	0	0	0	0	0	0	0	0	0	0	0	0	0	0	0	0	0	0	0	9.47306	0	7.3757	0	0	11.5579	0	0	0	0	0	0	0	0
Probable non-functional immunoglobulin kappa variable 2D-24	IGKV2D-24	0	0	11.6301	0	12.4745	0	11.7897	0	0	0	0	12.5767	0	11.8813	0	0	0	0	12.4721	9.23356	0	9.84421	11.3342	11.6003	0	0	10.9836	0	0	0	11.8426	11.118	0	10.9855	11.8767	0	8.83743	11.186	0	0	11.1583	11.4384	0	12.4607	0	10.2246	0	11.2257
Zinc finger protein ZIC 1 (Zinc finger protein 201) (Zinc finger protein of the cerebellum 1)	ZIC1	0	0	0	0	0	0	0	0	0	0	0	0	0	0	0	0	0	0	0	0	0	0	0	0	0	10.3825	0	0	0	0	0	0	0	0	0	0	0	0	0	0	0	0	0	0	0	0	0	0
Large ribosomal subunit protein mL38 (39S ribosomal protein L38, mitochondrial) (L38mt) (MRP-L38)	MRPL38	0	11.0383	0	0	0	0	0	0	0	0	0	0	0	0	12.0057	9.04952	0	10.2712	0	0	0	0	0	0	0	0	0	0	0	0	0	0	0	0	8.33242	10.2588	0	0	0	0	0	0	10.0436	0	0	0	0	0
Protein Mpv17	MPV17	7.68755	0	0	0	0	0	0	0	0	0	8.51591	0	0	0	11.8607	8.17238	9.14777	9.19042	0	0	7.10713	0	0	0	0	0	0	10.7783	0	0	0	0	9.10306	0	0	9.285	0	0	0	0	0	0	8.79927	0	8.74435	10.5799	0	11.7839
Dihydropyrimidinase-related protein 4 (DRP-4) (Collapsin response mediator protein 3) (CRMP-3) (UNC33-like phosphoprotein 4) (ULIP-4)	DPYSL4	0	0	0	0	0	0	0	0	0	0	0	0	0	0	0	0	11.1407	0	0	0	8.84668	0	0	0	0	0	0	11.1748	8.85277	0	0	0	8.81908	0	8.59074	10.01	7.61823	0	0	0	9.62108	0	9.73374	0	0	8.53739	0	0
Glutathione S-transferase theta-2 (EC 2.5.1.18) (GST class-theta-2)	GSTT2	0	0	0	0	0	0	0	0	0	0	0	0	0	8.40652	9.74931	9.24607	0	0	7.72577	0	0	0	0	0	0	0	0	0	0	7.38773	7.8572	0	0	0	0	0	9.11654	0	0	0	10.6134	0	0	0	0	0	0	9.11781
Polyhomeotic-like protein 3 (Early development regulatory protein 3) (Homolog of polyhomeotic 3) (hPH3)	PHC3	0	0	0	0	0	0	0	11.5049	0	0	0	0	0	0	0	11.0522	0	0	0	0	0	0	0	0	10.4659	0	0	0	0	0	0	0	0	0	0	0	0	0	0	0	0	0	10.2998	0	0	0	0	0
Leydig cell tumor 10 kDa protein homolog	C19orf53	0	0	0	0	0	0	0	0	0	0	0	0	10.8282	0	0	0	0	0	0	0	0	0	0	0	0	0	0	11.6935	0	0	0	0	0	0	0	0	0	0	0	0	0	0	0	0	0	0	0	0
Methyl-CpG-binding domain protein 1 (CXXC-type zinc finger protein 3) (Methyl-CpG-binding protein MBD1) (Protein containing methyl-CpG-binding domain 1)	MBD1	0	0	0	0	0	0	0	0	0	0	0	0	0	0	0	0	0	0	0	0	0	0	0	0	0	0	0	0	0	0	0	0	0	0	0	0	8.73525	0	0	0	0	0	0	0	0	8.54299	0	0
Major facilitator superfamily domain-containing protein 3	MFSD3	0	0	0	0	0	0	0	0	0	0	0	0	0	0	0	0	0	0	0	0	0	0	0	0	0	0	0	0	0	0	0	0	0	0	0	0	0	0	0	0	0	0	0	0	0	0	0	0
Peroxisomal biogenesis factor 3 (Peroxin-3) (Peroxisomal assembly protein PEX3)	PEX3	0	0	0	0	0	0	0	0	0	0	0	0	0	0	0	0	0	0	0	0	0	0	0	0	0	0	0	0	0	0	0	0	0	0	0	0	0	0	0	0	0	0	0	0	0	0	0	0
Oxidized purine nucleoside triphosphate hydrolase (EC 3.6.1.56) (2-hydroxy-dATP diphosphatase) (7,8-dihydro-8-oxoguanine triphosphatase) (8-oxo-dGTPase) (Methylated purine nucleoside triphosphate hydrolase) (EC 3.6.1.-) (Nucleoside diphosphate-linked moiety X motif 1) (Nudix motif 1)	NUDT1	0	0	0	0	0	0	0	0	0	0	0	0	0	0	0	0	0	0	0	0	0	0	0	0	8.96214	9.7828	0	0	0	0	0	0	0	0	0	0	0	0	0	0	9.83283	0	0	0	0	0	0	0
Calbindin (Calbindin D28) (D-28K) (Vitamin D-dependent calcium-binding protein, avian-type)	CALB1	0	0	0	8.30204	0	0	0	9.85997	0	0	0	0	0	0	0	0	10.2319	0	0	0	0	0	0	0	0	0	0	9.77242	0	0	0	0	0	0	0	0	0	0	10.8532	0	0	0	0	0	0	0	8.73285	0
Synaptosomal-associated protein 29 (SNAP-29) (Soluble 29 kDa NSF attachment protein) (Vesicle-membrane fusion protein SNAP-29)	SNAP29	0	0	0	0	0	0	0	0	0	0	0	0	8.13642	0	9.11603	0	14.9257	0	0	0	0	0	0	0	0	0	0	8.96518	0	0	0	0	9.03901	0	0	0	0	0	0	8.07095	0	0	0	0	10.6354	13.4998	7.93727	9.7535
GTP-binding protein Di-Ras2 (Distinct subgroup of the Ras family member 2)	DIRAS2	0	0	0	0	0	0	0	0	0	0	0	0	0	0	0	0	10.8565	0	0	0	0	0	0	0	0	0	0	10.0062	0	0	0	0	8.58715	0	0	0	0	0	0	0	0	0	9.40857	0	0	0	0	9.98058
Ribonuclease pancreatic (EC 4.6.1.18) (HP-RNase) (RIB-1) (RNase UpI-1) (Ribonuclease 1) (RNase 1) (Ribonuclease A) (RNase A)	RNASE1	8.22763	0	9.60542	8.95954	0	0	10.1526	0	0	0	6.82978	0	0	0	0	9.18328	10.5996	0	8.07706	0	0	10.2387	8.77142	8.90693	0	0	11.5531	0	0	0	8.24716	8.9006	0	0	0	0	0	0	0	7.80494	0	0	0	8.89528	0	0	8.55875	10.7355
HLA class II histocompatibility antigen, DQ beta 1 chain (MHC class II antigen DQB1)	HLA-DQB1	0	0	9.60893	9.98254	7.91617	10.2876	9.93895	0	0	0	0	0	0	0	0	10.2921	0	0	10.5213	7.00949	0	0	0	9.1149	0	9.59301	9.16642	10.4493	0	0	0	0	0	0	11.3801	0	0	0	10.67	0	9.60174	11.6191	0	8.80672	0	0	0	0
Ribosomal protein S6 kinase beta-2 (S6K-beta-2) (S6K2) (EC 2.7.11.1) (70 kDa ribosomal protein S6 kinase 2) (P70S6K2) (p70-S6K 2) (S6 kinase-related kinase) (SRK) (Serine/threonine-protein kinase 14B) (p70 ribosomal S6 kinase beta) (S6K-beta) (p70 S6 kinase beta) (p70 S6K-beta) (p70 S6KB) (p70-beta)	RPS6KB2	0	0	0	0	0	0	0	0	0	0	0	0	0	0	0	0	0	0	0	0	0	0	0	0	0	0	0	0	0	0	0	0	0	0	0	0	0	0	0	0	0	0	0	0	0	0	0	0
Tyrosine-protein kinase Fer (EC 2.7.10.2) (Feline encephalitis virus-related kinase FER) (Fujinami poultry sarcoma/Feline sarcoma-related protein Fer) (Proto-oncogene c-Fer) (Tyrosine kinase 3) (p94-Fer)	FER	0	0	0	0	0	0	0	0	0	0	7.92713	0	0	0	0	0	0	0	0	0	0	0	0	0	0	0	0	10.1475	0	0	0	0	0	0	0	0	0	0	0	7.65446	10.2868	8.37107	0	0	0	9.23905	9.5397	0
NADH dehydrogenase [ubiquinone] 1 subunit C2 (Complex I-B14.5b) (CI-B14.5b) (Human lung cancer oncogene 1 protein) (HLC-1) (NADH-ubiquinone oxidoreductase subunit B14.5b)	NDUFC2	0	9.85895	0	0	0	0	0	10.1334	9.69357	0	9.1793	0	9.26317	0	8.99722	8.24547	11.4422	9.16003	0	0	0	0	0	0	0	0	0	8.9354	9.57415	0	0	0	9.34509	8.08982	0	9.17448	0	0	0	0	0	0	8.35784	0	8.31221	11.5007	7.16894	7.2764
INO80 complex subunit E (Coiled-coil domain-containing protein 95)	INO80E	0	0	0	0	0	0	0	0	0	0	0	0	0	7.2605	0	0	0	0	0	8.79811	0	0	0	0	0	0	0	0	0	0	0	0	0	0	0	0	7.1847	0	0	0	9.51267	0	0	0	0	0	0	0
Polyamine-transporting ATPase 13A3 (ATPase family homolog up-regulated in senescence cells 1) (Putrescine transporting ATPase) (EC 7.6.2.16)	ATP13A3	0	0	0	0	0	0	0	0	0	0	0	0	0	0	0	0	0	7.73095	0	0	0	0	0	8.48995	0	0	0	0	7.99538	0	0	0	0	0	0	0	0	0	0	0	0	0	0	0	0	0	0	0
Nucleolysin TIAR (TIA-1-related protein)	TIAL1	0	0	0	0	0	0	0	12.8868	0	0	0	0	0	0	0	0	0	9.09013	0	0	7.74328	0	0	0	0	0	8.60996	0	8.84732	0	0	0	0	0	0	8.26669	0	0	0	0	0	0	0	0	0	8.68076	0	0
Mitochondrial thiamine pyrophosphate carrier (Mitochondrial thiamine pyrophosphate transporter) (MTPPT) (Mitochondrial uncoupling protein 1) (Solute carrier family 25 member 19)	SLC25A19	9.96089	0	0	0	0	0	0	0	0	0	0	0	0	0	0	0	0	0	0	0	0	0	0	0	0	0	0	0	0	0	0	0	11.201	0	7.92863	0	0	0	0	0	0	0	11.7248	0	12.0383	13.2784	0	0
Mitochondrial potassium channel (MITOK) (Coiled-coil domain-containing protein 51)	CCDC51	8.6901	10.0283	0	0	0	0	0	0	9.41459	9.29013	8.33331	0	0	0	10.5615	7.76141	0	9.6543	0	0	0	0	0	0	0	0	0	10.6936	0	0	0	0	8.99872	0	0	0	0	0	10.0701	0	0	0	9.24129	0	10.5252	10.5343	9.88882	11.251
BET1-like protein (Golgi SNARE with a size of 15 kDa) (GOS-15) (GS15) (Vesicle transport protein GOS15)	BET1L	0	0	0	0	0	0	0	0	0	0	0	0	0	8.27899	0	0	0	0	0	0	0	0	0	0	10.0548	8.74892	0	0	0	0	0	0	0	0	0	0	0	0	0	0	0	0	0	0	0	0	0	0
Insulin-like growth factor 2 mRNA-binding protein 2 (IGF2 mRNA-binding protein 2) (IMP-2) (Hepatocellular carcinoma autoantigen p62) (IGF-II mRNA-binding protein 2) (VICKZ family member 2)	IGF2BP2	0	0	0	0	0	0	0	8.13148	9.77176	8.87928	10.1302	0	0	6.92529	0	0	0	0	0	0	8.18882	7.71491	0	0	0	9.59218	0	0	8.81994	0	0	0	9.21054	7.41232	6.67062	8.33239	0	0	8.28172	0	0	8.23464	9.41428	0	8.85201	9.1466	9.54708	0
RB-associated KRAB zinc finger protein (RB-associated KRAB repressor) (hRBaK) (Zinc finger protein 769)	RBAK	7.36816	9.34532	8.24759	11.6048	0	0	0	0	9.93631	0	0	10.1655	11.3321	9.27202	0	0	0	0	10.7647	0	0	0	10.7358	9.71727	8.47645	0	9.71376	0	0	0	9.7205	10.3413	0	9.82451	0	8.03574	0	0	0	0	0	0	9.09133	10.6059	0	0	0	0
Dual specificity tyrosine-phosphorylation-regulated kinase 1A (EC 2.7.11.23) (EC 2.7.12.1) (Dual specificity YAK1-related kinase) (HP86) (Protein kinase minibrain homolog) (MNBH) (hMNB)	DYRK1A	0	0	0	0	0	0	0	0	0	0	0	0	0	0	0	0	0	0	0	0	0	0	0	0	0	0	0	0	0	0	0	0	0	0	0	8.93026	0	0	0	0	0	0	0	0	0	0	0	0
Homeobox protein SIX1 (Sine oculis homeobox homolog 1)	SIX1	0	0	0	0	0	0	0	0	0	0	0	0	0	0	10.1107	0	0	9.20197	0	0	0	0	0	0	0	10.4723	0	0	0	0	8.29662	0	0	0	0	8.47529	0	0	0	0	0	0	0	0	7.49541	9.0723	0	0
Cytoglobin (Histoglobin) (HGb) (Nitric oxygen dioxygenase CYGB) (NOD) (EC 1.14.12.-) (Nitrite reductase CYGB) (EC 1.7.-.-) (Pseudoperoxidase CYGB) (EC 1.11.1.-) (Stellate cell activation-associated protein) (Superoxide dismutase CYGB) (EC 1.15.1.1)	CYGB	0	0	8.51648	0	0	0	0	0	0	0	9.52142	0	0	9.7839	0	9.46445	9.4877	10.0505	0	0	0	0	8.7211	0	9.43012	10.1738	0	10.4342	0	0	0	8.40636	8.73534	7.69927	0	8.55889	0	0	0	0	0	0	0	0	9.62853	12.6576	9.6203	0
All-trans-retinol dehydrogenase [NAD(+)] ADH1B (EC 1.1.1.105) (Alcohol dehydrogenase 1B) (Alcohol dehydrogenase subunit beta)	ADH1B	0	0	8.96404	8.11367	9.76042	7.11292	8.8292	0	9.37543	9.09864	7.38704	0	0	8.31907	0	8.80914	7.92497	8.30441	8.01116	0	0	9.66274	15.9549	8.15517	8.59523	10.3324	0	0	0	0	9.68902	11.9278	0	9.78431	9.32947	0	11.0733	0	9.17895	7.26292	0	12.1173	0	10.9042	0	0	0	0
Vesicle-associated membrane protein 4 (VAMP-4)	VAMP4	0	0	0	0	0	0	0	0	0	0	0	0	0	0	9.3944	0	10.1018	0	0	0	0	0	0	0	0	10.1256	9.08785	0	0	0	0	0	0	0	0	0	0	9.44222	9.10547	0	9.08913	0	0	0	0	7.98804	0	11.2134
Semaphorin-3C (Semaphorin-E) (Sema E)	SEMA3C	0	0	0	0	0	0	0	0	0	11.2156	0	0	0	0	0	0	0	0	0	0	0	0	0	0	0	0	0	0	0	0	0	0	0	9.55785	8.71588	0	0	0	0	0	0	0	0	0	0	0	0	0
Ubiquitin carboxyl-terminal hydrolase 48 (EC 3.4.19.12) (Deubiquitinating enzyme 48) (Ubiquitin thioesterase 48) (Ubiquitin-specific peptidase 48) (Ubiquitin-specific protease 48) (Ubiquitin-specific-processing protease 48)	USP48	0	0	0	0	0	0	0	0	0	0	0	0	0	0	0	0	0	0	0	0	0	0	0	8.40469	0	0	0	0	0	0	8.8631	0	0	8.46114	0	0	0	10.6637	0	0	0	0	0	0	0	0	0	0
Probable helicase with zinc finger domain (EC 3.6.4.-) (Down-regulated in human cancers protein)	HELZ	0	0	0	0	0	0	0	0	0	0	0	0	0	0	0	0	0	0	0	0	0	0	0	0	0	10.6882	0	0	0	0	0	0	0	0	0	0	8.80146	0	0	0	0	0	0	0	0	0	6.75079	0
Mitochondrial potassium channel ATP-binding subunit (ATP-binding cassette sub-family B member 8, mitochondrial) (ABCB8) (Mitochondrial ATP-binding cassette 1) (M-ABC1) (Mitochondrial sulfonylurea-receptor) (MITOSUR)	ABCB8	0	0	0	0	0	0	0	0	0	0	0	0	0	7.62536	0	0	9.41112	0	0	0	0	0	8.31313	0	0	0	0	10.7899	0	9.48457	0	8.3269	0	0	0	8.61092	9.53633	0	0	0	0	10.4453	0	0	0	0	0	0
ATP-dependent RNA helicase DDX51 (EC 3.6.4.13) (DEAD box protein 51)	DDX51	0	0	0	0	0	0	0	0	0	11.5027	0	0	0	0	0	0	0	0	0	0	0	0	0	0	0	0	0	0	0	0	0	0	0	0	0	0	7.89997	0	0	0	0	0	0	0	0	0	0	0
Sodium- and chloride-dependent GABA transporter 2 (GAT-2) (Solute carrier family 6 member 13)	SLC6A13	0	8.24866	0	0	0	0	0	0	0	0	0	0	0	7.90764	0	0	0	0	0	10.233	9.06709	0	0	0	0	0	0	0	0	0	0	0	0	0	0	0	10.2863	0	0	7.89011	0	12.1036	0	0	0	0	0	0
Nucleoside diphosphate kinase homolog 7 (NDK 7) (NDP kinase homolog 7) (3'-5' exonuclease NME7) (EC 3.1.-.-) (Protein kinase NME7) (EC 2.7.-.-) (nm23-H7)	NME7	0	0	0	0	0	0	0	0	0	0	0	0	0	0	0	0	0	0	0	0	0	0	0	0	0	0	0	0	0	0	0	0	0	0	0	0	0	0	0	0	0	0	0	0	0	0	0	0
Transmembrane protein 128	TMEM128	0	0	0	0	7.7695	0	0	0	0	0	0	0	0	0	0	0	0	0	0	0	0	0	0	0	9.40534	9.25801	0	0	0	0	0	0	0	0	7.15518	0	0	0	8.48469	0	0	0	0	8.30214	0	0	0	0
Folate receptor alpha (FR-alpha) (Adult folate-binding protein) (FBP) (Folate receptor 1) (Folate receptor, adult) (KB cells FBP) (Ovarian tumor-associated antigen MOv18)	FOLR1	0	10.2139	0	0	0	8.33922	10.1663	0	0	0	0	0	0	0	0	0	0	0	8.83265	9.73628	0	0	0	8.62257	8.71475	0	9.52343	9.2167	9.3097	0	8.94072	0	7.4679	0	0	0	0	10.9166	0	9.23359	11.1089	9.50162	0	9.9215	0	0	0	9.62639
ADP-ribosylation factor-like protein 5A	ARL5A	0	0	0	0	0	0	0	0	0	0	0	0	0	0	0	0	0	9.80647	0	0	0	0	0	0	0	0	9.57108	0	0	0	0	0	0	0	0	0	0	0	0	0	9.98486	0	10.1895	0	0	0	0	10.9223
Sulfotransferase 1C2 (ST1C2) (EC 2.8.2.1) (Sulfotransferase 1C1) (SULT1C#1) (humSULTC2)	SULT1C2	0	14.224	0	0	0	0	0	11.864	0	0	0	0	0	0	0	0	0	0	0	0	0	0	0	0	0	0	0	0	0	0	0	0	0	0	0	0	0	0	0	0	0	0	0	0	0	8.91252	9.36165	0
Tetraspanin-3 (Tspan-3) (Tetraspanin TM4-A) (Transmembrane 4 superfamily member 8)	TSPAN3	0	0	0	0	0	0	0	7.64888	0	0	0	0	0	0	0	0	0	0	0	0	0	9.67107	0	0	0	0	0	0	0	0	0	0	7.59517	0	0	0	0	0	0	0	8.85731	0	7.21391	0	0	0	0	0
TBC1 domain family member 22A	TBC1D22A	0	0	0	0	0	0	0	0	0	0	0	0	0	0	0	0	0	0	0	0	0	0	0	0	0	0	0	0	0	0	8.39883	7.90019	0	0	0	0	0	11.9811	0	0	0	0	0	0	0	0	0	0
Interferon regulatory factor 3 (IRF-3)	IRF3	0	0	0	0	0	0	0	0	0	0	0	0	0	0	0	0	0	0	0	8.76547	9.18656	0	0	0	0	0	0	0	0	7.57512	0	0	0	0	0	0	0	0	0	8.75175	0	0	9.08973	0	0	0	0	0
Neutral amino acid transporter B(0) (ATB(0)) (Baboon M7 virus receptor) (RD114/simian type D retrovirus receptor) (Sodium-dependent neutral amino acid transporter type 2) (Solute carrier family 1 member 5)	SLC1A5	0	0	0	8.17417	0	9.41191	0	0	0	0	0	0	0	0	0	0	0	0	8.00751	0	0	0	0	0	8.93637	0	0	0	0	8.32502	8.7492	0	0	0	8.14513	0	0	0	9.50491	0	9.35579	9.50902	0	8.41686	0	0	0	0
Signal recognition particle 19 kDa protein (SRP19)	SRP19	0	11.199	0	0	0	0	0	0	0	0	0	0	0	0	0	0	9.54956	0	0	0	7.63631	0	0	0	0	0	0	0	9.71514	0	0	0	0	0	0	0	0	0	10.3892	9.05715	0	0	0	0	10.2751	10.5817	0	11.7784
Alpha-actinin-2 (Alpha-actinin skeletal muscle isoform 2) (F-actin cross-linking protein)	ACTN2	0	0	10.6325	9.21796	9.35275	0	11.753	9.51499	11.6015	0	0	8.98684	0	8.52833	0	0	10.5921	11.5846	11.1179	0	8.64246	11.1042	11.8698	10.7696	11.3568	10.1226	0	11.3836	0	8.9953	0	9.81946	9.55022	14.6774	0	0	0	10.1567	10.1706	9.96672	0	10.472	11.1749	12.3067	0	0	13.1221	0
Sodium-coupled neutral amino acid symporter 1 (Amino acid transporter A1) (N-system amino acid transporter 2) (Solute carrier family 38 member 1) (System A amino acid transporter 1) (System N amino acid transporter 1)	SLC38A1	0	0	0	0	0	0	0	0	0	0	0	0	0	0	0	0	0	0	0	0	0	0	0	0	8.14807	9.47333	0	0	0	7.63443	0	0	0	0	7.27878	0	0	7.99282	8.89938	8.82424	0	0	0	0	0	0	0	0
Interferon gamma receptor 1 (IFN-gamma receptor 1) (IFN-gamma-R1) (CDw119) (Interferon gamma receptor alpha-chain) (IFN-gamma-R-alpha) (CD antigen CD119)	IFNGR1	0	0	0	0	0	0	0	8.87612	0	8.58243	11.3151	0	0	0	0	0	0	0	0	10.2096	0	0	0	0	0	0	8.17513	8.42802	0	0	0	0	0	0	0	0	0	0	9.54649	9.78499	0	8.61714	0	8.12274	0	8.38089	0	0
Histone H2B type 3-B (H2B type 12) (H2B-clustered histone 26) (H2B.U histone 1)	H2BC26	8.16051	10.237	0	0	8.97542	0	0	9.91936	9.33744	0	10.7749	0	9.64538	0	9.44953	7.87219	0	9.8947	5.63804	0	8.34989	0	0	7.27386	0	0	0	0	11.4815	0	9.45744	0	10.5286	6.60894	0	8.28526	0	0	0	0	0	0	10.9852	0	8.57469	10.8805	7.78979	9.64215
Thiol S-methyltransferase TMT1B (EC 2.1.1.9) (Methyltransferase-like protein 7B) (Thiol S-methyltransferase METTL7B)	TMT1B	8.95615	0	8.52781	0	0	0	0	0	0	0	0	0	10.5267	0	9.02813	10.9124	0	0	0	0	0	0	0	8.16628	0	0	0	11.5929	0	0	0	7.56506	0	8.91215	0	9.90315	0	0	0	8.67105	8.24179	0	0	8.75141	0	0	0	7.89643
Sulfotransferase 1E1 (ST1E1) (EC 2.8.2.4) (EST-1) (Estrogen sulfotransferase) (Sulfotransferase, estrogen-preferring)	SULT1E1	0	10.935	0	0	0	0	0	0	9.52367	7.52405	0	0	0	0	0	0	0	0	0	9.26128	0	8.43113	0	8.85143	0	0	0	0	0	0	0	0	0	8.1997	0	0	8.00797	0	0	0	0	0	0	0	0	8.56448	0	11.8527
Neutrophil collagenase (EC 3.4.24.34) (Matrix metalloproteinase-8) (MMP-8) (PMNL collagenase) (PMNL-CL)	MMP8	0	0	8.591	8.6961	9.66509	8.36597	0	0	0	0	0	8.4614	0	11.8572	0	0	0	0	9.68874	8.12947	0	9.48989	9.03776	8.60828	0	0	0	7.61993	0	8.80297	8.3651	10.2252	0	0	11.2134	0	9.95681	0	0	9.04413	0	9.44982	0	10.2563	0	0	0	0
ATP-dependent Clp protease proteolytic subunit, mitochondrial (EC 3.4.21.92) (Endopeptidase Clp)	CLPP	0	0	0	0	0	0	0	0	0	0	0	0	0	0	0	0	0	0	0	0	9.29103	0	0	0	0	0	0	0	0	0	0	0	0	10.104	0	8.89104	0	0	0	0	9.98418	0	0	0	8.9581	0	9.29995	0
Tumor suppressor candidate 3 (Dolichyl-diphosphooligosaccharide--protein glycosyltransferase subunit TUSC3) (Oligosaccharyl transferase subunit TUSC3) (Magnesium uptake/transporter TUSC3) (Protein N33)	TUSC3	0	0	0	0	0	0	0	0	0	0	0	0	0	0	0	0	0	0	0	0	0	0	0	0	0	0	0	0	0	0	0	0	0	0	0	0	0	0	0	0	0	0	0	0	0	0	0	0
Cytochrome b-c1 complex subunit 8 (Complex III subunit 8) (Complex III subunit VIII) (Ubiquinol-cytochrome c reductase complex 9.5 kDa protein) (Ubiquinol-cytochrome c reductase complex ubiquinone-binding protein QP-C)	UQCRQ	9.61393	9.00024	0	0	0	0	0	10.7139	10.298	0	9.97463	0	10.5222	0	10.2968	8.53319	12.4325	9.33363	0	0	9.68509	0	0	0	0	0	0	10.9063	9.29172	0	0	0	10.1578	7.90608	0	8.88	0	0	0	0	0	0	9.20378	0	8.51042	11.3927	7.74442	0
LRRN4 C-terminal-like protein	LRRN4CL	0	10.5142	0	0	9.1678	7.80887	0	9.18464	0	0	10.4652	0	10.3566	0	0	0	0	8.97449	0	0	0	0	0	0	0	10.5075	8.43409	10.2303	9.93624	9.49811	0	0	8.86458	0	8.36368	7.98908	0	0	10.4902	8.11638	0	9.38222	9.63369	0	8.50813	7.93884	8.78694	10.1572
Endoplasmic reticulum protein SC65 (Leprecan-like protein 4) (Nucleolar autoantigen No55) (Prolyl 3-hydroxylase family member 4) (Synaptonemal complex protein SC65)	P3H4	0	0	0	0	0	0	0	0	0	0	0	0	0	0	0	0	0	0	0	0	0	0	0	0	0	0	9.79757	0	0	9.39268	0	0	0	0	0	0	9.08692	10.5621	0	8.61822	10.553	0	0	9.05182	0	0	0	0
Acyl-CoA dehydrogenase family member 11 (ACAD-11) (EC 1.3.8.-)	ACAD11	0	0	0	0	0	0	0	0	0	0	0	0	0	0	0	0	0	0	0	0	0	0	0	0	0	0	0	0	0	0	0	0	0	0	0	0	0	0	0	0	0	0	0	0	0	0	0	0
RNA-binding protein 27 (RNA-binding motif protein 27)	RBM27	0	0	0	0	0	0	0	10.159	10.2519	0	0	0	10.0852	0	11.1188	9.51373	0	10.4798	0	0	0	0	0	0	9.10896	0	0	10.1114	9.63744	0	0	0	0	0	0	0	0	0	0	0	0	0	0	0	0	9.70477	0	0
Tumor necrosis factor receptor superfamily member 14 (Herpes virus entry mediator A) (Herpesvirus entry mediator A) (HveA) (Tumor necrosis factor receptor-like 2) (TR2) (CD antigen CD270)	TNFRSF14	0	0	0	0	0	0	8.71598	0	0	0	0	0	0	7.99236	0	0	0	0	0	0	0	0	0	0	8.22481	0	7.54806	0	0	0	0	0	9.66722	0	0	0	0	9.20312	11.0018	0	0	0	0	9.2917	0	0	0	9.03755
Neprilysin (EC 3.4.24.11) (Atriopeptidase) (Common acute lymphocytic leukemia antigen) (CALLA) (Enkephalinase) (Neutral endopeptidase 24.11) (NEP) (Neutral endopeptidase) (Skin fibroblast elastase) (SFE) (CD antigen CD10)	MME	0	0	9.0892	8.5835	8.93095	10.5459	10.5868	0	0	0	0	0	8.65736	0	0	8.48386	0	0	8.91836	0	8.41428	0	9.30605	9.45003	8.90075	0	8.03946	0	0	7.67596	9.86201	9.67963	0	9.7775	6.0531	0	7.33069	9.31732	0	0	9.53768	0	0	9.72885	0	0	0	0
Neurotrimin (hNT) (IgLON family member 2)	NTM	0	0	0	8.56877	0	0	0	0	0	0	0	0	11.4721	0	0	0	11.8126	0	6.82292	0	0	0	7.81646	7.5959	10.2254	0	9.35566	10.6515	0	0	0	8.94457	0	0	0	0	0	8.69125	9.26568	0	0	8.93733	0	8.9632	0	0	0	0
Multimerin-2 (EMILIN-3) (Elastin microfibril interface located protein 3) (Elastin microfibril interfacer 3) (EndoGlyx-1 p125/p140 subunit)	MMRN2	0	0	0	0	0	0	0	0	0	0	0	0	0	9.93302	9.73265	8.96571	0	0	9.67331	0	0	0	8.6222	8.39724	0	0	0	0	0	10.2463	0	0	0	0	0	0	0	0	0	0	0	0	0	10.7079	0	0	9.30804	10.0918
Carbonyl reductase [NADPH] 3 (EC 1.1.1.184) (NADPH-dependent carbonyl reductase 3) (Quinone reductase CBR3) (EC 1.6.5.10) (Short chain dehydrogenase/reductase family 21C member 2)	CBR3	0	0	0	0	0	0	0	0	0	0	0	0	0	0	0	0	9.45271	0	0	0	0	0	9.03646	0	0	9.0041	0	0	0	0	9.11948	8.82319	0	9.0222	8.63957	0	11.5816	0	0	8.44119	0	0	9.44035	0	0	0	0	0
TBC1 domain family member 4 (Akt substrate of 160 kDa) (AS160)	TBC1D4	0	0	0	0	0	0	0	0	0	0	0	0	0	0	0	0	0	0	0	0	0	0	0	0	0	0	0	0	0	0	0	0	0	8.6517	9.13064	0	0	0	0	0	0	0	0	0	0	0	0	0
Tubulin beta-1 chain	TUBB1	0	0	9.41666	9.62805	12.4425	9.29887	9.05308	0	0	0	10.8156	9.35165	0	11.8445	0	8.75632	10.1873	9.58056	10.1874	10.0486	0	9.50778	8.78105	9.87188	8.10193	0	0	8.84723	0	8.48527	9.75139	10.3781	9.90348	9.81161	0	0	9.62179	9.6038	0	9.02822	0	9.57472	9.45507	10.4526	10.2232	0	0	10.9259
Dematin (Dematin actin-binding protein) (Erythrocyte membrane protein band 4.9)	DMTN	0	9.86125	9.0695	9.00072	9.07113	8.02242	0	8.40988	9.26928	0	6.79822	10.2967	9.62238	11.3415	8.18373	7.88193	12.0389	9.23385	7.42528	0	6.7923	0	0	0	0	0	0	10.4489	0	9.15758	0	8.65254	7.95472	7.26337	0	0	0	0	8.34887	0	0	7.59061	8.4577	0	8.90241	10.0826	6.69309	8.85158
HLA class I histocompatibility antigen, alpha chain F (CDA12) (HLA F antigen) (Leukocyte antigen F) (MHC class I antigen F)	HLA-F	0	0	0	0	0	0	0	0	0	10.557	0	5.7276	0	0	0	0	0	0	7.2687	0	7.69568	0	0	9.31166	0	0	10.1361	0	8.93513	5.22312	0	0	0	0	6.28023	0	9.54267	0	10.8584	8.68118	0	9.99376	0	6.27618	6.63256	0	0	9.60781
Haloacid dehalogenase-like hydrolase domain-containing protein 3	HDHD3	0	0	0	0	0	0	0	0	0	0	0	0	0	0	0	0	0	0	0	0	0	0	0	0	0	0	0	0	0	0	7.69936	7.56623	6.84269	0	0	0	0	0	0	0	0	0	0	0	7.0589	0	0	0
Tryptase alpha/beta-1 (Tryptase-1) (EC 3.4.21.59) (Tryptase I) (Tryptase alpha-1)	TPSAB1	0	8.60417	10.7235	8.94748	8.71181	8.9956	10.4094	9.02995	7.98275	8.04047	7.39434	0	0	8.01981	0	10.0612	0	7.95978	9.63718	0	0	0	13.1017	8.37964	8.58964	0	8.03501	8.29661	8.1321	10.6969	10.7536	9.60663	7.63491	7.33478	0	6.73696	8.99656	0	11.5427	7.2029	6.48141	7.36172	8.20735	10.0486	9.83392	7.02537	7.20222	7.96169
Mitogen-activated protein kinase 8 (MAP kinase 8) (MAPK 8) (EC 2.7.11.24) (JNK-46) (Stress-activated protein kinase 1c) (SAPK1c) (Stress-activated protein kinase JNK1) (c-Jun N-terminal kinase 1)	MAPK8	0	0	0	0	0	0	0	0	0	0	0	0	0	0	0	0	0	0	0	0	0	9.8847	0	0	0	0	0	0	0	0	0	0	0	0	0	0	0	0	0	0	0	0	0	0	0	0	0	0
Reticulon-4 (Foocen) (Neurite outgrowth inhibitor) (Nogo protein) (Neuroendocrine-specific protein) (NSP) (Neuroendocrine-specific protein C homolog) (RTN-x) (Reticulon-5)	RTN4	11.405	0	0	8.60113	10.7867	9.39097	0	11.2485	0	0	0	0	0	9.45703	0	0	9.28801	0	0	0	0	0	9.74383	8.89102	0	0	0	0	0	9.3074	10.5664	9.29082	0	0	0	0	8.27665	11.7852	0	0	0	0	0	0	0	0	0	0
Acrosomal protein KIAA1210	KIAA1210	0	0	0	0	0	0	0	0	0	8.38655	0	0	10.234	0	0	0	0	0	0	0	9.04912	0	0	0	9.95177	0	0	0	9.16607	9.13478	0	0	9.68149	0	10.6981	0	0	10.1043	8.87603	8.2135	8.75378	8.51727	9.63354	8.95737	0	0	9.78681	0
Interleukin-1 receptor accessory protein (IL-1 receptor accessory protein) (IL-1RAcP) (EC 3.2.2.6) (Interleukin-1 receptor 3) (IL-1R-3) (IL-1R3)	IL1RAP	0	0	0	9.29812	8.75357	0	8.39858	0	0	0	0	0	0	0	0	0	0	0	0	7.94671	0	8.78766	10.156	9.55112	9.34767	10.0679	0	0	0	8.62289	0	10.108	0	0	9.17815	0	0	8.4111	0	11.6028	0	8.60502	0	9.6247	0	0	0	0
Phospholipid-transporting ATPase IG (EC 7.6.2.1) (ATPase IQ) (ATPase class VI type 11C) (P4-ATPase flippase complex alpha subunit ATP11C)	ATP11C	0	0	0	0	0	0	0	0	0	9.70657	0	0	0	0	0	0	0	0	0	0	0	0	0	0	0	0	0	0	0	7.6367	0	0	0	0	0	0	0	0	0	0	0	0	0	0	0	0	0	0
4-hydroxy-2-oxoglutarate aldolase, mitochondrial (EC 4.1.3.16) (Dihydrodipicolinate synthase-like) (DHDPS-like protein) (Probable 2-keto-4-hydroxyglutarate aldolase) (Probable KHG-aldolase) (Protein 569272)	HOGA1	0	0	0	0	0	0	0	0	0	0	0	0	0	0	0	0	0	0	0	0	0	0	0	0	0	0	0	0	0	0	0	0	0	0	0	0	0	0	0	0	0	0	0	0	0	0	0	0
Actin filament-associated protein 1-like 2 (AFAP1-like protein 2)	AFAP1L2	0	9.83234	0	0	0	0	0	10.0393	0	0	0	0	0	0	9.87955	8.47706	0	8.64815	0	0	0	0	8.17664	0	0	0	0	9.37	8.49053	0	0	0	8.04828	0	0	0	0	0	0	0	0	0	8.4132	0	9.43514	9.4412	0	0
Pyridine nucleotide-disulfide oxidoreductase domain-containing protein 2 (EC 1.-.-.-)	PYROXD2	8.75854	0	6.65129	0	0	0	8.42509	0	0	0	0	0	10.2822	0	0	0	0	8.60031	8.18544	0	0	0	8.1643	7.49344	0	0	0	9.73982	9.52659	9.15089	0	8.59195	7.51039	0	8.35029	8.17139	0	0	9.61673	8.61363	10.2899	10.2547	6.89478	8.52401	8.56055	9.95563	8.00728	10.2326
Keratin, type II cytoskeletal 71 (Cytokeratin-71) (CK-71) (Keratin-71) (K71) (Type II inner root sheath-specific keratin-K6irs1) (Keratin 6 irs) (hK6irs) (hK6irs1) (Type-II keratin Kb34)	KRT71	0	0	0	7.59955	9.81649	0	8.42009	0	0	9.2236	0	7.91662	7.25407	7.83963	7.98711	0	7.87515	0	0	0	13.4836	7.54461	10.2439	0	7.35884	11.2891	7.92582	0	8.80162	0	9.15759	0	0	9.90182	9.59932	0	8.69472	10.5077	10.2426	0	10.1289	11.1077	0	7.76214	0	0	0	8.25886
Prefoldin subunit 5 (Myc modulator 1) (c-Myc-binding protein Mm-1)	PFDN5	0	0	0	0	0	0	0	0	0	0	0	0	0	0	0	8.23598	0	9.44005	0	0	0	0	0	0	0	0	0	0	0	0	0	0	8.76948	8.23598	0	7.58231	0	0	0	0	0	0	8.55569	0	0	0	0	0
Rho-related GTP-binding protein RhoE (Protein MemB) (Rho family GTPase 3) (Rho-related GTP-binding protein Rho8) (Rnd3)	RND3	0	0	0	0	0	0	0	0	0	0	0	0	0	0	0	0	0	0	0	0	0	0	0	0	0	0	8.18096	0	0	0	0	9.09412	0	0	0	0	0	10.2985	0	0	0	0	0	0	0	0	0	0
Apolipoprotein A-II (Apo-AII) (ApoA-II) (Apolipoprotein A2) [Cleaved into: Proapolipoprotein A-II (ProapoA-II); Truncated apolipoprotein A-II (Apolipoprotein A-II(1-76))]	APOA2	11.4656	8.64007	9.4507	10.7324	12.0871	9.16276	9.88635	5.98925	8.34832	7.2866	0	10.84	7.77305	10.54	7.39457	9.3274	9.35355	11.3191	10.0348	0	0	7.40891	9.89117	10.5425	0	0	10.5577	8.20649	10.2214	11.3311	8.12955	11.0329	8.62732	9.72202	12.6505	8.95011	8.6706	9.29336	7.82633	7.35175	8.01399	8.21904	8.27848	8.47896	9.86978	10.7845	9.02119	9.21693
Solute carrier organic anion transporter family member 2A1 (SLCO2A1) (OATP2A1) (PHOAR2) (Prostaglandin transporter) (PGT) (Solute carrier family 21 member 2) (SLC21A2)	SLCO2A1	0	9.83081	0	0	8.7871	0	8.58071	8.55064	0	9.53644	0	0	0	9.41779	10.0194	0	0	9.16387	9.66695	9.37722	0	0	8.2544	8.99179	0	0	0	0	9.24537	9.82949	7.93644	9.68322	0	0	7.17261	0	9.91713	9.03282	10.3792	8.7932	7.63538	7.83273	0	7.75184	10.4419	10.5657	0	10.6363
Carboxypeptidase A4 (EC 3.4.17.-) (Carboxypeptidase A3)	CPA4	0	0	0	0	0	0	0	0	0	0	0	0	10.4638	0	0	0	0	0	0	0	0	0	0	0	0	9.26224	0	0	0	0	0	0	0	0	9.61366	0	0	0	9.33742	7.43574	0	9.8669	0	0	0	10.5517	10.0775	0
Snurportin-1 (RNA U transporter 1)	SNUPN	0	0	0	0	0	0	0	10.4645	9.3774	0	9.73061	0	10.2468	0	0	0	0	0	0	0	10.1413	0	0	0	10.1434	10.2129	0	0	0	0	0	0	10.6491	0	0	0	0	0	10.1053	8.72887	9.69139	0	10.4627	9.13022	10.1437	9.81594	9.76989	10.1357
Induced myeloid leukemia cell differentiation protein Mcl-1 (Bcl-2-like protein 3) (Bcl2-L-3) (Bcl-2-related protein EAT/mcl1) (mcl1/EAT)	MCL1	0	0	0	0	0	0	0	0	0	0	0	0	0	0	0	0	0	0	0	0	0	0	0	0	0	0	0	0	0	0	0	0	0	0	0	0	0	0	0	0	0	0	0	0	0	0	0	0
CDGSH iron-sulfur domain-containing protein 3, mitochondrial (MitoNEET-related protein 2) (Miner2) (Mitochondrial inner NEET protein) (MiNT)	CISD3	0	10.3109	0	0	0	0	0	9.71267	9.33587	0	9.20918	0	9.68891	0	8.8374	9.89571	10.5354	0	0	0	8.50464	0	0	0	0	7.35954	8.94751	9.36311	0	0	0	0	0	7.11	0	10.2587	0	0	0	0	8.08856	0	9.90685	0	10.7419	10.9985	0	0
Bcl-2 homologous antagonist/killer (Apoptosis regulator BAK) (Bcl-2-like protein 7) (Bcl2-L-7)	BAK1	0	0	0	0	0	0	0	0	0	0	0	0	0	0	0	0	0	0	0	0	0	0	0	0	0	9.86241	0	0	0	0	8.2039	0	0	0	0	0	0	0	0	0	0	0	0	0	0	0	0	0
Immunoglobulin heavy variable 3-49	IGHV3-49	0	0	0	11.3586	10.7038	11.0293	9.73414	0	0	0	0	10.0802	0	9.56756	0	0	0	0	10.7572	0	0	8.50977	10.4821	11.0499	0	0	0	0	0	9.03323	11.6327	10.873	0	10.6606	8.66576	0	8.1928	9.07625	0	0	0	8.17811	0	11.2677	0	0	0	0
Trafficking protein particle complex subunit 2-like protein	TRAPPC2L	0	0	0	0	0	0	0	0	0	0	0	0	0	0	0	0	0	0	0	0	0	0	0	0	0	10.8471	0	0	0	0	0	0	7.59637	0	0	0	0	0	0	0	0	0	0	0	0	0	0	0
Chloride intracellular channel protein 5	CLIC5	0	0	0	8.95707	0	0	0	0	11.3916	0	9.86342	0	0	0	0	0	0	9.89812	8.52298	0	0	0	0	0	0	0	8.47614	0	10.7312	0	7.52506	0	9.45779	8.38147	0	8.12303	0	0	0	0	0	0	9.30071	0	9.49091	10.4599	8.10344	0
Ribosomal protein uL24-like (60S ribosomal protein L26-like 1) (Large ribosomal subunit protein uL24-like 1)	RPL26L1	0	0	0	0	10.0554	0	0	9.92262	9.76326	0	10.5104	0	9.25368	8.76868	10.4533	10.271	8.19575	9.81831	0	9.93247	9.31082	9.43223	0	0	10.6919	9.82227	10.1541	10.4205	9.81639	9.88279	0	0	10.6543	0	0	10.0252	0	9.96165	9.27411	0	0	9.84539	10.91	10.2059	10.5598	9.40781	10.879	10.2117
Microsomal glutathione S-transferase 1 (Microsomal GST-1) (EC 2.5.1.18) (Microsomal GST-I)	MGST1	0	0	9.82396	7.62486	0	0	0	0	0	0	0	0	0	9.37893	10.5036	10.0928	10.3176	0	8.21884	0	0	8.07314	8.65296	8.01731	0	0	0	8.21967	0	6.49024	7.67058	10.0144	0	7.53202	6.48155	7.80035	8.24433	0	0	0	0	0	0	7.37227	0	8.90336	0	0
Peptide-N(4)-(N-acetyl-beta-glucosaminyl)asparagine amidase (PNGase) (hPNGase) (EC 3.5.1.52) (N-glycanase 1) (Peptide:N-glycanase)	NGLY1	0	0	0	0	9.63578	8.81249	10.0005	0	0	0	0	7.87933	0	0	0	0	0	0	0	0	0	9.10843	0	0	0	10.295	0	0	0	7.26487	0	0	0	9.70571	7.01785	0	0	0	0	0	10.3028	0	0	0	0	0	0	0
Cysteine sulfinic acid decarboxylase (EC 4.1.1.29) (Aspartate 1-decarboxylase) (EC 4.1.1.11) (Cysteine-sulfinate decarboxylase) (Sulfinoalanine decarboxylase)	CSAD	0	0	8.23787	0	0	9.16324	0	0	0	0	0	0	0	0	10.7248	0	0	0	9.39229	0	0	0	0	8.96705	0	11.0239	7.75598	0	0	0	9.09738	9.80714	0	0	0	0	9.91351	0	0	0	11.5428	0	0	10.8185	0	0	0	10.3058
E3 ubiquitin-protein ligase RNF126 (EC 2.3.2.27) (RING finger protein 126)	RNF126	0	0	0	0	0	0	11.4459	0	0	0	0	10.7335	0	9.66825	0	0	9.14249	0	0	8.92289	8.69103	11.5249	0	0	0	0	0	0	0	0	8.58431	0	0	0	0	0	8.92281	11.0447	11.7683	0	0	10.7093	0	0	0	0	0	11.4817
Chloride intracellular channel protein 3	CLIC3	8.32194	0	0	0	0	0	0	8.49209	10.4935	0	10.1158	0	9.43996	0	0	0	0	9.63568	0	0	0	0	0	0	9.08663	8.68386	0	8.45313	8.61643	0	0	0	8.1421	0	0	9.49947	0	0	8.56669	8.37438	8.67463	0	8.90767	0	10.5234	10.5435	8.30249	0
Dickkopf-related protein 3 (Dickkopf-3) (Dkk-3) (hDkk-3)	DKK3	0	0	0	9.68721	10.7033	8.22571	9.85763	0	0	8.88283	0	11.0603	0	0	0	0	11.4754	0	8.85996	0	0	9.96962	0	9.61669	8.57356	0	9.16438	0	0	0	8.72671	7.6401	0	0	0	0	0	8.69618	0	0	0	0	0	8.99077	0	0	0	11.0551
Peptidyl-prolyl cis-trans isomerase FKBP14 (PPIase FKBP14) (EC 5.2.1.8) (22 kDa FK506-binding protein) (22 kDa FKBP) (FKBP-22) (FK506-binding protein 14) (FKBP-14) (Rotamase)	FKBP14	0	0	0	0	0	0	0	0	0	9.93966	0	0	0	0	0	0	0	0	0	0	0	0	0	0	9.9908	10.1272	8.2022	0	0	0	0	0	8.48515	0	0	7.90964	0	0	0	0	0	0	0	0	0	0	0	0
Alpha- and gamma-adaptin-binding protein p34	AAGAB	0	0	0	0	0	0	0	0	0	11.3368	0	0	0	0	0	0	0	0	0	0	0	0	0	0	0	10.1927	0	0	0	7.83117	0	0	0	11.1675	9.07084	9.63374	0	10.6719	10.5355	11.4911	0	0	0	0	0	0	0	0
Chondroitin sulfate synthase 2 (EC 2.4.1.175) (EC 2.4.1.226) (Chondroitin glucuronyltransferase 2) (Chondroitin-polymerizing factor) (ChPF) (Glucuronosyl-N-acetylgalactosaminyl-proteoglycan 4-beta-N-acetylgalactosaminyltransferase II) (N-acetylgalactosaminyl-proteoglycan 3-beta-glucuronosyltransferase II) (N-acetylgalactosaminyltransferase 2)	CHPF	0	0	0	0	0	0	0	0	0	0	0	0	0	0	0	0	0	0	0	0	0	0	0	0	0	0	0	0	0	0	0	0	0	0	0	9.55053	0	0	9.70273	7.94648	0	0	0	0	0	0	0	0
Glycerophosphodiester phosphodiesterase 1 (Glycerophosphoinositol glycerophosphodiesterase GDE1) (EC 3.1.4.44) (Lysophospholipase D GDE1) (EC 3.1.4.-) (Membrane-interacting protein of RGS16) (RGS16-interacting membrane protein)	GDE1	0	0	0	0	0	0	0	11.5366	0	8.97884	0	0	0	0	0	10.5433	11.407	0	0	7.78166	0	0	0	0	9.21543	8.50391	0	11.352	0	8.67276	0	0	10.0632	9.99044	9.11123	0	9.26586	0	8.94493	0	9.29143	0	0	8.79341	11.1252	10.2454	10.2962	9.5801
Epidermal growth factor-like protein 7 (EGF-like protein 7) (Multiple epidermal growth factor-like domains protein 7) (Multiple EGF-like domains protein 7) (NOTCH4-like protein) (Vascular endothelial statin) (VE-statin) (Zneu1)	EGFL7	0	0	8.7862	10.0763	0	9.57466	0	0	0	11.1397	0	0	0	0	10.5367	0	0	0	10.1243	0	0	0	9.06277	8.66528	0	0	0	0	0	8.20414	8.94708	8.20618	0	8.82453	8.77458	0	10.2419	0	0	8.12542	0	9.54582	0	10.1851	0	9.87115	0	0
Melanoma-associated antigen D1 (MAGE tumor antigen CCF) (MAGE-D1 antigen) (Neurotrophin receptor-interacting MAGE homolog)	MAGED1	0	0	0	0	0	0	0	0	0	0	0	0	10.6853	0	0	0	0	0	0	0	0	0	0	0	0	0	7.14019	0	0	0	0	0	0	0	0	0	0	0	0	0	0	0	0	0	0	7.48796	0	0
Formin-binding protein 1-like (Transducer of Cdc42-dependent actin assembly protein 1) (Toca-1)	FNBP1L	0	0	0	0	0	0	0	0	0	0	0	0	0	0	0	0	0	0	0	0	0	0	0	0	0	0	0	0	0	0	0	0	0	0	0	0	0	0	0	8.05108	0	0	0	0	0	0	0	0
Apolipoprotein C-I (Apo-CI) (ApoC-I) (Apolipoprotein C1) [Cleaved into: Truncated apolipoprotein C-I]	APOC1	0	7.89383	10.6023	9.90932	9.20633	12.3447	7.06229	7.05285	7.05115	6.9531	10.0728	10.549	0	12.1368	7.77388	0	0	0	11.549	8.58723	0	0	10.1407	10.5385	6.57079	0	0	6.97002	0	10.7333	10.0963	10.4195	9.75763	0	10.0495	0	0	7.4206	0	0	0	6.29986	0	7.46321	0	0	0	8.54
G-patch domain and KOW motifs-containing protein (G-patch domain-containing protein 5) (Protein MOS2 homolog) (Protein T54)	GPKOW	0	0	0	0	0	0	0	0	0	0	0	0	0	0	0	0	0	0	0	0	0	0	0	0	0	0	0	0	0	0	0	0	0	0	0	8.97009	0	0	0	0	0	0	0	0	7.70837	0	8.53257	10.3853
CD82 antigen (C33 antigen) (IA4) (Inducible membrane protein R2) (Metastasis suppressor Kangai-1) (Suppressor of tumorigenicity 6 protein) (Tetraspanin-27) (Tspan-27) (CD antigen CD82)	CD82	0	0	0	0	8.56098	0	8.74893	0	0	0	0	8.2966	0	0	0	0	0	8.46944	9.95226	0	0	7.96166	8.88916	9.16372	0	0	0	0	0	8.93104	9.88975	8.49389	8.55302	0	7.6958	0	0	7.95322	8.31059	0	8.24235	0	8.02328	0	0	0	0	8.98794
Sodium- and chloride-dependent GABA transporter 3 (GAT-3) (Solute carrier family 6 member 11)	SLC6A11	0	0	0	0	0	8.34812	0	0	8.00642	0	0	0	0	7.88902	0	7.61661	10.1319	0	0	0	0	0	0	0	0	0	0	8.29842	0	7.83537	0	0	0	0	8.15236	0	0	8.33267	0	0	0	11.1853	0	8.28689	0	0	0	0
Protein lifeguard 3 (Protein RECS1 homolog) (Transmembrane BAX inhibitor motif-containing protein 1)	TMBIM1	0	0	0	8.52393	11.484	10.4076	11.0589	0	0	10.1993	0	10.5026	0	9.92371	0	0	0	0	10.1256	8.54201	9.41632	10.4224	10.5098	9.592	9.96539	10.6846	0	0	0	9.30676	9.49696	9.54276	0	0	8.53368	0	0	10.5358	9.61959	0	0	10.3135	0	10.7077	0	0	0	0
Contactin-4 (Brain-derived immunoglobulin superfamily protein 2) (BIG-2)	CNTN4	0	0	0	0	0	0	0	0	0	0	0	7.02775	8.59335	0	0	0	0	0	0	0	0	7.70486	8.52002	0	9.32447	8.26381	8.66735	0	0	0	0	8.27241	0	0	6.63475	0	0	0	0	0	8.58734	0	0	0	0	0	0	0
DCN1-like protein 3 (DCNL3) (DCUN1 domain-containing protein 3) (Defective in cullin neddylation protein 1-like protein 3) (Squamous cell carcinoma-related oncogene 3)	DCUN1D3	0	0	0	0	0	0	0	0	0	0	0	0	0	0	0	0	0	0	0	0	0	0	8.11604	0	0	0	0	0	0	0	0	0	0	0	0	0	0	0	0	0	0	0	0	9.50852	0	0	0	0
MAM domain-containing protein 2 (MAM domain-containing proteoglycan) (Mamcan)	MAMDC2	0	0	9.65702	10.1827	0	10.0167	10.1698	0	0	11.1467	0	0	0	0	8.67725	0	0	0	9.50345	0	0	0	9.97086	9.25872	9.06879	0	0	0	0	8.3911	10.0905	8.58565	0	0	7.9875	0	9.91271	8.76932	0	0	8.94112	10.6446	0	9.51171	0	0	0	0
Receptor for retinol uptake STRA6 (Retinol-binding protein receptor STRA6) (Stimulated by retinoic acid gene 6 protein homolog)	STRA6	9.85712	11.328	0	0	0	0	0	11.3789	0	9.63212	0	0	0	0	0	0	0	8.48618	0	0	6.87772	6.58635	0	5.70041	0	0	0	0	9.43603	7.85259	0	0	10.0518	0	0	9.22743	9.47005	0	9.08108	0	0	9.76303	10.2926	0	8.04731	0	7.31492	9.25736
Alpha-enolase (EC 4.2.1.11) (2-phospho-D-glycerate hydro-lyase) (C-myc promoter-binding protein) (Enolase 1) (MBP-1) (MPB-1) (Non-neural enolase) (NNE) (Phosphopyruvate hydratase) (Plasminogen-binding protein)	ENO1	9.75284	10.6245	0	0	0	0	10.2571	10.5413	12.0981	8.32998	10.0098	0	11.9119	0	10.8177	11.5667	11.7091	10.3264	7.51431	0	0	9.73855	9.98413	9.20821	10.7404	0	11.5394	11.2577	9.97373	0	0	9.80835	10.5513	9.9795	0	11.4322	0	0	10.7608	0	13.3548	11.8237	12.3901	10.5755	9.67253	10.26	10.0445	9.80218
DCN1-like protein 5 (DCNL5) (DCUN1 domain-containing protein 5) (Defective in cullin neddylation protein 1-like protein 5) (Squamous cell carcinoma-related oncogene 5)	DCUN1D5	0	0	0	0	0	0	0	0	0	0	0	0	0	0	0	0	0	0	0	0	0	0	0	0	0	0	0	0	0	0	0	0	0	0	0	0	0	0	0	0	0	0	0	0	0	0	0	0
GDNF family receptor alpha-1 (GDNF receptor alpha-1) (GDNFR-alpha-1) (GFR-alpha-1) (RET ligand 1) (TGF-beta-related neurotrophic factor receptor 1)	GFRA1	0	0	0	0	0	0	0	0	0	9.68928	0	0	8.71694	0	0	8.11953	0	0	0	0	0	0	9.3782	8.41235	8.4832	9.60851	8.56773	0	7.77843	0	0	7.82476	0	0	0	0	0	8.57628	0	8.3984	8.26318	0	0	0	0	0	0	0
Zinc finger X-chromosomal protein	ZFX	0	0	0	0	0	0	0	0	0	9.78818	0	7.28852	0	0	0	0	0	0	0	8.16982	11.7914	0	0	0	0	0	0	0	0	0	0	0	0	0	9.54836	0	0	9.35231	0	7.90961	0	0	0	0	0	0	0	0
WD repeat, SAM and U-box domain-containing protein 1	WDSUB1	0	0	0	0	0	0	0	0	0	0	0	0	0	0	0	0	0	0	0	0	0	0	0	0	0	0	0	0	0	0	0	0	0	0	0	0	0	0	0	0	0	0	0	0	0	0	0	10.728
Ergosterol biosynthetic protein 28 homolog	ERG28	0	0	0	0	0	0	0	0	0	0	0	0	0	0	0	0	0	0	0	0	0	0	0	0	10.4591	9.69286	0	0	0	0	0	0	0	0	7.52758	0	0	9.88901	0	0	0	0	0	0	0	0	0	0
Ficolin-3 (Collagen/fibrinogen domain-containing lectin 3 p35) (Collagen/fibrinogen domain-containing protein 3) (Hakata antigen)	FCN3	0	0	10.7157	10.1441	12.1197	12.6324	11.3091	0	0	0	0	12.9181	0	12.5015	0	0	0	0	10.7429	8.28392	0	9.31983	11.1055	11.2971	0	0	0	0	0	10.5781	11.0736	11.7639	0	10.7805	9.40326	0	10.1845	10.2153	0	8.17862	0	10.4251	0	10.8737	0	0	0	0
Inactive tyrosine-protein kinase transmembrane receptor ROR1 (Neurotrophic tyrosine kinase, receptor-related 1)	ROR1	0	0	0	0	0	0	0	0	0	8.05785	0	7.22016	10.2535	0	0	0	0	0	0	0	0	0	0	0	8.8306	9.07854	9.02936	0	7.83995	0	0	7.57349	8.71719	0	0	0	0	10.0016	0	8.30537	9.33363	0	8.64842	8.19325	8.67387	0	0	9.35753
Acyl-coenzyme A thioesterase THEM4 (Acyl-CoA thioesterase THEM4) (EC 3.1.2.2) (Carboxyl-terminal modulator protein) (Thioesterase superfamily member 4)	THEM4	0	0	0	0	0	0	0	0	0	0	0	0	0	0	0	0	0	0	0	0	0	0	0	0	0	0	0	0	0	0	0	0	0	7.91988	5.96294	0	0	0	0	0	0	0	0	0	0	0	0	10.2892
TATA element modulatory factor (TMF) (Androgen receptor coactivator 160 kDa protein) (Androgen receptor-associated protein of 160 kDa)	TMF1	0	0	0	0	11.5646	0	0	0	8.57874	9.44143	0	0	9.0906	10.6039	0	0	0	0	0	0	0	9.70624	10.2807	11.1097	9.1585	8.63557	0	0	0	0	0	10.4475	0	0	10.9087	0	0	0	0	0	9.46238	10.8173	0	11.6033	0	0	8.57474	10.3847
Enoyl-[acyl-carrier-protein] reductase, mitochondrial (EC 1.3.1.104) (2-enoyl thioester reductase) (Nuclear receptor-binding factor 1) (HsNrbf-1) (NRBF-1)	MECR	9.65898	11.5593	0	0	0	0	0	11.6334	11.6376	0	10.0543	0	10.8175	0	11.7115	8.69119	10.4806	9.67058	0	0	7.3041	0	0	0	0	0	8.94295	12.3644	9.07836	0	0	0	10.0378	0	0	8.34897	0	0	0	0	0	0	10.0955	0	9.7613	10.4382	8.63735	9.71394
N-terminal EF-hand calcium-binding protein 1 (EF-hand calcium-binding protein 1) (Neuronal calcium-binding protein 1)	NECAB1	11.1992	0	0	0	0	0	0	9.16561	9.20732	0	0	0	10.0286	0	8.53103	9.524	8.73667	0	0	9.44283	8.53881	9.41163	0	0	0	0	9.00577	10.957	8.84906	0	0	7.84226	7.7719	0	9.20643	9.10429	0	9.81624	0	8.76958	10.5069	8.69625	0	0	0	0	9.29231	10.4846
Myotubularin-related protein 6 (Phosphatidylinositol-3,5-bisphosphate 3-phosphatase) (EC 3.1.3.95) (Phosphatidylinositol-3-phosphate phosphatase) (EC 3.1.3.64)	MTMR6	0	0	0	0	0	0	0	0	0	0	0	0	0	0	0	0	0	0	8.10469	8.26362	8.87879	0	0	0	0	0	0	0	0	0	0	0	0	0	0	9.42337	0	0	0	9.25224	10.1085	10.1502	10.0133	0	9.87978	9.46722	9.66077	0
Insulin-like growth factor II (IGF-II) (Somatomedin-A) (T3M-11-derived growth factor) [Cleaved into: Insulin-like growth factor II; Insulin-like growth factor II Ala-25 Del; Preptin]	IGF2	0	0	8.6944	8.95245	0	9.54392	10.8654	0	0	0	0	8.95896	0	9.264	10.13	0	0	0	9.47993	8.01131	0	0	0	9.9007	0	10.8068	0	0	0	0	9.14138	0	0	9.7341	8.74089	8.70899	10.8395	0	0	10.9632	0	11.3482	0	9.96532	0	0	9.89644	0
Derlin-2 (Degradation in endoplasmic reticulum protein 2) (DERtrin-2) (Der1-like protein 2) (F-LAN-1) (F-LANa)	DERL2	0	0	0	0	10.6434	11.5959	10.8003	0	0	11.802	0	9.5843	0	10.2052	0	0	0	0	11.9329	11.0581	12.792	11.0665	9.82618	10.2492	11.7405	12.1827	0	0	0	10.7055	10.9152	10.0736	0	0	9.90985	0	10.7616	12.0592	11.6685	11.6358	11.6161	11.2887	0	10.9923	0	0	0	10.1438
Protein GOLM2 (Cancer susceptibility candidate gene 4 protein) (CASC4) (Golgi membrane protein 2)	GOLM2	0	0	0	0	8.49028	0	7.99843	0	0	8.21207	0	9.31716	0	0	0	0	7.68595	0	0	0	0	0	0	0	8.96619	7.61619	0	0	8.06735	7.62999	0	0	0	0	7.41574	7.98899	0	8.22974	9.33927	0	0	0	0	0	8.64648	0	0	8.8181
ATP-binding cassette sub-family C member 9 (Sulfonylurea receptor 2)	ABCC9	0	0	0	0	0	8.59876	0	0	0	0	0	0	0	0	0	0	0	0	7.8511	8.166	0	0	10.1546	0	0	0	0	0	0	7.445	8.25992	8.15122	0	9.43992	0	0	9.37542	9.79918	0	0	9.41303	9.78567	0	0	0	0	0	0
Choline dehydrogenase, mitochondrial (CDH) (CHD) (EC 1.1.99.1)	CHDH	0	11.59	0	0	0	0	0	0	0	0	9.54932	0	0	0	0	10.5631	8.92892	9.99025	0	0	0	0	0	7.6985	0	0	0	0	0	8.29005	8.79942	0	10.3342	0	0	0	0	9.72624	9.60931	8.32437	0	0	11.0172	0	10.6239	0	0	0
Non-lysosomal glucosylceramidase (NLGase) (EC 3.2.1.45) (Beta-glucocerebrosidase 2) (Beta-glucosidase 2) (Bile acid beta-glucosidase GBA2) (Bile acid glucosyl transferase GBA2) (Cholesterol glucosyltransferase GBA2) (EC 2.4.1.-) (Cholesteryl-beta-glucosidase GBA2) (EC 3.2.1.-) (Glucosylceramidase 2) (Non-lysosomal cholesterol glycosyltransferase) (Non-lysosomal galactosylceramidase) (EC 3.2.1.46)…	GBA2	0	0	0	0	0	0	0	0	0	0	0	0	0	0	0	0	0	0	0	0	0	0	0	0	0	0	0	0	0	0	0	0	0	0	0	0	8.49772	0	0	0	0	0	0	0	0	0	0	0
2-iminobutanoate/2-iminopropanoate deaminase (EC 3.5.99.10) (14.5 kDa translational inhibitor protein) (hp14.5) (p14.5) (Heat-responsive protein 12) (Reactive intermediate imine deaminase A homolog) (Translation inhibitor L-PSP ribonuclease) (UK114 antigen homolog)	RIDA	0	0	0	0	0	0	0	0	11.2336	0	0	0	0	10.0681	0	0	0	0	0	0	0	0	0	8.66716	0	9.68413	9.61476	11.4675	0	0	9.07192	0	8.96366	10.2183	8.65023	0	8.23908	0	0	9.30606	10.1475	0	0	0	0	9.61266	0	10.6846
Solute carrier organic anion transporter family member 2B1 (Organic anion transporter B) (OATP-B) (Organic anion transporter polypeptide-related protein 2) (OATP-RP2) (OATPRP2) (Organic anion transporting polypeptide 2B1) (OATP2B1) (Solute carrier family 21 member 9)	SLCO2B1	0	0	0	0	0	0	9.54861	9.42378	0	0	0	0	0	0	0	0	0	0	0	0	0	0	8.18854	0	8.78931	0	0	9.07867	0	0	0	8.08933	0	0	0	0	7.26212	9.07727	0	0	9.12539	9.57209	0	9.30215	0	8.09187	0	0
Dedicator of cytokinesis protein 10 (Zizimin-3)	DOCK10	0	0	0	0	0	0	0	0	0	0	0	0	0	0	0	0	0	0	0	0	0	0	0	0	0	0	0	0	0	0	8.70573	0	0	8.37087	0	0	0	0	0	0	0	0	0	0	0	0	0	0
Merlin (Moesin-ezrin-radixin-like protein) (Neurofibromin-2) (Schwannomerlin) (Schwannomin)	NF2	0	0	0	0	0	0	0	0	0	0	0	0	0	0	0	0	0	0	0	0	0	0	0	0	0	0	0	0	0	0	0	0	0	0	0	0	0	0	0	0	0	10.0336	0	0	0	0	0	10.5445
Spatacsin (Colorectal carcinoma-associated protein) (Spastic paraplegia 11 protein)	SPG11	0	0	0	0	0	0	0	0	0	0	0	0	11.1547	0	0	0	0	0	0	0	0	0	0	8.36844	0	0	0	0	0	0	0	0	0	8.31435	0	8.17134	8.23932	0	0	9.44788	0	0	0	0	0	0	0	0
mRNA decay activator protein ZFP36L1 (Butyrate response factor 1) (EGF-response factor 1) (ERF-1) (TPA-induced sequence 11b) (Zinc finger protein 36, C3H1 type-like 1) (ZFP36-like 1)	ZFP36L1	0	0	0	0	0	0	0	0	0	0	0	8.39417	9.32754	0	0	0	0	0	0	0	0	0	0	0	0	0	0	0	0	0	0	0	9.72413	0	0	0	8.54415	0	0	0	0	0	10.1082	0	0	0	0	10.7799
Elastin (Tropoelastin)	ELN	0	0	7.70644	7.86256	0	0	0	0	0	0	0	0	9.94561	0	0	0	0	8.26036	0	0	0	9.33958	6.93441	0	0	0	0	0	0	0	7.7504	0	0	7.33333	0	8.57048	10.293	0	0	6.81539	0	0	6.83224	0	0	0	0	0
Renin receptor (ATPase H(+)-transporting lysosomal accessory protein 2) (ATPase H(+)-transporting lysosomal-interacting protein 2) (ER-localized type I transmembrane adapter) (Embryonic liver differentiation factor 10) (N14F) (Renin/prorenin receptor) (Vacuolar ATP synthase membrane sector-associated protein M8-9) (ATP6M8-9) (V-ATPase M8.9 subunit) [Cleaved into: Renin receptor N-terminal fragmen…	ATP6AP2	9.24511	0	0	0	0	0	0	0	0	0	9.33342	0	0	0	9.41758	8.12685	8.86392	0	0	0	0	0	0	0	0	0	8.05775	0	0	0	0	0	8.36484	0	0	7.31027	0	0	0	0	0	0	8.29642	0	0	0	0	9.68971
LIM domain and actin-binding protein 1 (Epithelial protein lost in neoplasm)	LIMA1	0	11.2707	0	0	0	0	0	10.6576	9.41382	0	0	0	10.4585	0	9.56851	0	6.16095	0	0	0	8.74297	0	0	8.78025	0	0	0	9.69383	10.0604	0	7.37663	0	0	0	0	0	6.39989	0	0	8.38793	0	0	0	0	0	10.6738	10.506	0
Netrin receptor UNC5C (Protein unc-5 homolog 3) (Protein unc-5 homolog C)	UNC5C	0	11.296	0	0	0	0	0	10.7185	10.2306	0	0	0	9.31932	0	0	0	0	8.29729	0	0	0	0	0	7.6422	0	0	0	10.3257	9.28274	0	0	0	9.51534	0	0	0	0	9.98428	10.1377	0	0	0	8.44044	0	0	0	9.56621	0
Heterogeneous nuclear ribonucleoprotein D0 (hnRNP D0) (AU-rich element RNA-binding protein 1)	HNRNPD	11.4654	9.16041	6.45874	0	0	0	8.45877	9.82738	8.94326	9.38325	10.1749	0	10.1838	7.6068	11.2588	10.9336	7.97842	10.1861	0	0	9.93034	9.00931	6.26931	6.91083	0	0	8.19637	10.7752	10.0463	0	6.92749	6.02038	11.0866	0	0	9.45621	2.81149	8.22271	9.91419	8.51429	0	9.76556	11.0725	0	9.86794	8.54859	10.5611	11.2717
Large ribosomal subunit protein uL16m (39S ribosomal protein L16, mitochondrial) (L16mt) (MRP-L16)	MRPL16	8.21399	0	0	0	0	0	0	10.7512	0	0	8.0895	0	0	0	0	7.42833	7.72112	8.95829	0	0	7.87273	0	0	0	0	0	0	0	0	0	0	0	8.84434	0	0	8.52755	0	0	0	0	0	0	8.30552	0	8.54561	8.78259	8.08162	10.3986
Nucleosome assembly protein 1-like 1 (NAP-1-related protein) (hNRP)	NAP1L1	0	0	0	7.85726	10.8445	9.72339	10.2252	0	0	9.43895	0	10.4327	0	9.02028	0	0	0	0	0	9.02117	10.4432	9.52756	9.30785	11.0149	9.19083	10.556	0	0	0	8.91387	9.97013	0	0	10.0532	0	0	0	0	8.72012	0	10.4927	9.75994	0	9.34401	0	0	0	0
Small EDRK-rich factor 2 (Gastric cancer-related protein VRG107) (Protein 4F5-related) (4F5rel) (h4F5rel)	SERF2	0	9.2956	0	0	0	0	0	10.5802	9.40481	0	9.93911	0	9.20575	0	9.97156	7.48214	0	0	0	0	0	0	0	0	0	8.56518	0	0	0	0	0	0	0	0	0	0	0	0	0	0	0	0	0	0	0	7.72496	0	10.5629
Protein arginine N-methyltransferase 2 (EC 2.1.1.319) (Histone-arginine N-methyltransferase PRMT2)	PRMT2	0	0	0	0	0	0	0	0	0	0	0	0	0	0	0	0	0	0	0	0	0	0	0	0	0	10.7995	0	0	0	0	0	0	0	0	0	0	0	10.6156	0	0	0	0	0	0	0	0	0	0
F-box/LRR-repeat protein 8 (F-box and leucine-rich repeat protein 8) (F-box protein FBL8)	FBXL8	0	0	0	0	0	0	0	0	0	0	0	0	0	0	0	0	0	0	0	0	0	0	0	8.07413	0	0	0	0	0	0	0	0	0	0	0	0	0	0	0	9.4499	0	0	0	0	0	0	0	0
Multiple inositol polyphosphate phosphatase 1 (EC 3.1.3.62) (2,3-bisphosphoglycerate 3-phosphatase) (2,3-BPG phosphatase) (EC 3.1.3.80)	MINPP1	0	0	0	8.62358	0	0	0	0	0	0	0	0	0	8.77626	0	0	0	0	9.57451	0	0	0	0	7.7014	0	0	8.83411	0	0	0	7.96053	7.58063	0	7.6952	0	7.32534	7.54848	0	0	0	0	0	0	0	0	0	0	9.58424
Golgi reassembly-stacking protein 1 (Golgi peripheral membrane protein p65) (Golgi phosphoprotein 5) (GOLPH5) (Golgi reassembly-stacking protein of 65 kDa) (GRASP65)	GORASP1	0	0	0	0	0	0	0	0	0	0	0	0	0	0	0	0	0	0	0	9.19533	0	0	0	0	0	0	0	0	0	0	0	0	0	0	0	0	0	0	0	0	0	0	0	0	0	0	0	0
G-protein coupled receptor family C group 5 member C (Retinoic acid-induced gene 3 protein) (RAIG-3)	GPRC5C	0	0	0	0	0	0	0	9.59869	0	10.7887	0	0	0	0	0	0	0	0	0	7.35233	0	9.66654	0	0	0	0	0	0	0	0	0	0	0	0	0	0	8.59199	10.0883	0	7.18781	0	9.67058	0	0	9.37546	8.50759	9.2155	12.6425
Collagen alpha-2(V) chain	COL5A2	0	0	8.95406	9.73317	9.29684	9.81957	11.5326	0	0	11.9121	0	0	0	10.3397	8.91942	0	0	7.04725	9.20394	8.9763	0	0	9.3082	8.70011	0	0	0	0	0	10.1889	9.53541	7.79446	0	0	9.6248	7.81841	9.46153	7.99186	8.23075	0	0	10.7226	0	7.95792	6.10629	7.78319	0	10.6347
SH3 domain-binding protein 5 (SH3BP-5) (SH3 domain-binding protein that preferentially associates with BTK)	SH3BP5	0	0	0	0	0	0	0	0	0	0	0	0	0	0	0	0	0	0	0	0	0	0	0	0	0	0	0	0	7.12142	0	0	0	8.93277	0	0	0	0	8.5855	0	0	0	0	8.60916	0	8.79475	0	8.03672	11.4636
Pseudouridine-5'-phosphatase (EC 3.1.3.96) (Haloacid dehalogenase-like hydrolase domain-containing protein 1) (Haloacid dehalogenase-like hydrolase domain-containing protein 1A) (Protein GS1) (Pseudouridine-5'-monophosphatase) (5'-PsiMPase)	PUDP	0	0	0	0	0	0	0	11.4012	11.3857	0	9.66212	0	10.7619	8.64106	11.3235	0	9.36521	9.69394	8.74239	0	0	0	0	0	0	10.186	9.90034	10.3678	9.66781	0	0	0	10.6568	10.4025	0	8.90358	0	0	10.1282	10.2637	11.118	9.93872	10.3599	10.3826	9.89884	9.11161	10.1357	0
Adhesion G protein-coupled receptor L2 (Calcium-independent alpha-latrotoxin receptor 2) (CIRL-2) (Latrophilin homolog 1) (Latrophilin-2) (Lectomedin-1)	ADGRL2	0	0	0	0	0	0	9.39414	0	0	0	0	0	0	0	0	8.60244	0	0	7.97432	0	0	0	8.07442	0	0	0	9.24303	0	0	0	0	0	9.12314	0	0	8.68264	0	0	10.2002	0	0	0	8.83156	0	9.37463	0	8.72692	11.2754
Peroxisomal targeting signal 1 receptor (PTS1 receptor) (PTS1R) (PTS1-BP) (Peroxin-5) (Peroxisomal C-terminal targeting signal import receptor) (Peroxisome receptor 1)	PEX5	0	0	0	0	0	0	0	0	0	0	0	0	0	0	0	0	0	0	0	0	0	0	0	0	0	0	0	0	0	0	0	0	0	8.41696	0	0	0	9.19194	0	0	0	0	0	9.02977	0	0	0	0
V-type immunoglobulin domain-containing suppressor of T-cell activation (Platelet receptor Gi24) (Stress-induced secreted protein-1) (Sisp-1) (V-set domain-containing immunoregulatory receptor) (V-set immunoregulatory receptor)	VSIR	0	0	0	0	11.1701	0	0	0	0	9.96772	0	0	0	9.74529	0	0	0	0	0	0	0	0	0	0	10.5818	0	6.55614	0	0	0	0	0	0	0	0	0	0	10.0259	0	0	10.3608	10.8973	0	9.42302	0	0	0	0
Integrin alpha-11	ITGA11	0	9.63707	0	0	0	0	8.68709	0	0	8.702	0	0	9.57462	0	10.0109	0	0	0	0	0	0	8.11446	0	0	0	0	0	0	0	0	0	0	0	0	0	0	0	0	8.99678	0	0	8.33851	9.59444	0	0	0	0	9.83504
Motile sperm domain-containing protein 2	MOSPD2	0	0	0	0	0	0	0	0	0	0	0	0	0	0	0	0	0	0	0	0	0	0	0	0	0	0	0	0	0	0	0	0	0	0	0	0	0	0	0	0	0	0	0	0	0	0	0	0
Growth arrest-specific protein 1 (GAS-1)	GAS1	0	0	0	0	0	0	0	11.4559	10.9056	0	0	9.39831	10.5632	0	0	0	0	8.29288	0	0	0	0	0	0	0	0	0	0	0	8.13703	6.19612	0	9.09717	0	0	8.46289	7.86275	11.5613	0	0	0	0	8.70211	0	0	9.0037	0	11.0203
Aminomethyltransferase, mitochondrial (EC 2.1.2.10) (Glycine cleavage system T protein) (GCVT)	AMT	0	9.99957	0	0	0	0	0	9.29923	0	0	0	0	10.1205	0	0	8.622	8.11762	8.2315	0	0	0	0	0	9.68175	0	0	0	0	8.66575	0	8.85931	0	8.54943	0	0	10.7172	0	0	11.0088	8.93948	0	0	7.75813	0	7.91173	8.90833	0	0
Gap junction beta-6 protein (Connexin-30) (Cx30)	GJB6	7.26384	9.14716	0	0	0	0	0	9.69959	0	0	0	9.6583	0	0	0	0	8.54522	7.18405	7.82928	9.19163	8.37795	0	0	0	0	0	0	8.49632	8.75277	7.88303	6.82102	0	8.14094	0	0	8.20481	7.87189	9.25502	0	0	0	9.4807	8.45012	6.95374	9.04238	0	0	9.10037
Protocadherin gamma-C3 (PCDH-gamma-C3) (Protocadherin-2) (Protocadherin-43) (PC-43)	PCDHGC3	0	0	0	0	0	0	8.70423	0	0	0	0	0	0	0	0	0	0	0	0	0	0	0	0	8.69025	0	0	0	8.85839	8.70188	0	0	0	0	0	0	0	0	8.69329	9.67204	0	8.63696	0	0	0	0	7.15912	0	0
Leucine-rich repeat-containing protein 14	LRRC14	0	0	0	0	0	0	0	0	0	0	0	0	0	0	0	0	0	0	0	0	0	0	0	0	0	0	0	0	0	0	0	0	0	0	7.11794	0	7.45276	0	0	0	0	0	0	0	0	0	0	0
Phosphoribosyltransferase domain-containing protein 1	PRTFDC1	0	0	0	0	0	0	9.19693	0	0	0	0	0	0	8.10441	0	0	0	0	0	0	0	0	0	0	0	8.76123	0	0	0	0	0	0	0	0	0	0	7.9964	0	9.04981	0	9.01167	0	0	8.70969	0	0	0	0
Guided entry of tail-anchored proteins factor 1 (Congenital heart disease 5 protein) (Tail-anchored protein insertion receptor WRB) (Tryptophan-rich basic protein)	GET1	0	0	0	0	0	0	0	0	0	0	0	0	0	0	0	0	0	0	0	0	0	0	0	8.27619	0	0	0	0	0	0	0	0	0	0	0	0	0	0	0	7.98432	0	0	0	0	0	0	0	0
NGFI-A-binding protein 2 (EGR-1-binding protein 2) (Melanoma-associated delayed early response protein) (Protein MADER)	NAB2	0	0	0	0	0	0	0	0	0	0	0	0	0	0	0	0	0	0	0	0	0	0	0	0	0	0	0	0	0	0	0	0	0	0	0	0	0	0	9.05965	0	0	0	0	0	0	0	0	0
Collagen alpha-1(XI) chain	COL11A1	0	0	11.2423	11.3754	12.2164	11.0211	0	0	0	12.9461	10.0237	9.22668	0	12.6175	0	0	0	0	10.491	9.63837	8.85588	12.5669	0	10.729	9.40089	8.47266	0	0	0	12.5266	10.4022	0	0	10.7341	0	0	10.7775	9.76915	9.98839	10.1936	10.4301	0	0	12.5	0	0	0	10.5854
Ephrin-A5 (AL-1) (EPH-related receptor tyrosine kinase ligand 7) (LERK-7)	EFNA5	0	0	0	0	0	0	0	0	0	0	0	0	0	0	0	9.14579	9.40889	9.01863	8.69287	0	0	0	0	7.94417	0	0	0	0	0	0	8.66634	0	8.58352	0	0	9.00783	0	0	0	0	0	0	8.57834	0	8.98658	9.07064	0	12.38
Actin-binding LIM protein 3 (abLIM-3) (Actin-binding LIM protein family member 3)	ABLIM3	0	0	0	0	0	0	0	10.8811	10.813	0	0	0	0	0	0	0	0	8.54071	0	0	8.81699	0	0	0	0	0	7.6731	9.31825	9.52708	0	0	0	8.47849	8.73308	0	7.25241	7.82458	0	0	10.7762	0	0	8.23462	0	7.06327	8.15596	9.57361	0
Cytochrome b-c1 complex subunit 7 (Complex III subunit 7) (Complex III subunit VII) (QP-C) (Ubiquinol-cytochrome c reductase complex 14 kDa protein)	UQCRB	6.80609	0	7.96827	0	0	0	0	0	9.53381	0	7.8058	0	0	0	10.7459	0	11.5061	0	0	0	0	0	0	0	0	0	0	9.84545	0	0	0	0	8.46237	7.18635	0	9.02028	0	0	0	0	0	0	0	0	9.05221	11.4702	6.94432	0
Cytoplasmic dynein 1 intermediate chain 1 (Cytoplasmic dynein intermediate chain 1) (Dynein intermediate chain 1, cytosolic) (DH IC-1)	DYNC1I1	8.00796	0	0	0	0	0	9.42033	0	0	0	8.9697	0	10.8314	0	9.96461	8.78169	10.592	0	0	0	0	8.56434	0	8.38974	0	7.79668	0	9.36476	10.0341	0	6.56984	0	11.5215	6.89954	0	0	0	0	9.48463	6.76991	0	9.09111	10.5707	9.00247	0	0	7.51313	0
Sterile alpha motif domain-containing protein 9-like (SAM domain-containing protein 9-like)	SAMD9L	0	0	0	0	0	0	0	0	0	0	0	0	0	0	0	0	0	0	0	0	8.91061	7.80319	0	0	0	0	0	0	0	0	0	0	0	0	0	0	0	8.40408	0	0	0	8.42372	0	7.86388	0	0	0	0
Immunoglobulin heavy variable 3-43	IGHV3-43	0	0	0	10.5272	11.2636	11.0637	11.4094	0	0	0	0	0	0	10.5404	0	0	0	0	11.0464	0	0	8.41273	9.88989	11.089	8.33678	0	0	0	0	7.02355	9.3991	9.94985	0	9.62984	0	0	9.55155	8.7367	0	0	0	8.42038	0	9.86373	0	0	0	0
Transcription termination factor 4, mitochondrial (Mitochondrial transcription termination factor 4) (mTERF domain-containing protein 2) [Cleaved into: mTERF domain-containing protein 2 processed]	MTERF4	0	0	0	0	0	0	0	0	0	10.9024	0	7.16708	0	0	0	0	0	0	0	7.09569	0	0	0	0	0	0	0	0	0	0	0	0	0	0	9.03507	0	0	9.46248	9.10681	0	0	9.3622	0	0	0	0	0	9.35369
Fucose-1-phosphate guanylyltransferase (EC 2.7.7.30) (GDP-L-fucose diphosphorylase) (GDP-L-fucose pyrophosphorylase)	FPGT	0	0	0	0	0	0	0	0	0	0	0	0	0	0	0	0	0	0	0	0	0	0	0	0	0	0	0	0	9.21413	0	0	0	0	8.18979	0	0	0	0	0	0	0	0	0	8.86083	0	0	7.09602	0
Protein unc-13 homolog B (Munc13-2) (munc13)	UNC13B	0	0	0	0	0	0	0	0	0	0	0	0	0	0	0	0	0	0	0	0	0	0	0	0	0	0	0	0	0	0	0	0	0	0	0	0	0	0	0	0	0	0	0	0	0	0	0	0
Translocon-associated protein subunit gamma (TRAP-gamma) (Signal sequence receptor subunit gamma) (SSR-gamma)	SSR3	0	0	0	0	11.0682	0	0	10.859	10.9751	11.8298	10.2885	10.346	0	10.4817	0	10.4823	0	0	0	0	0	11.5125	10.0324	10.9357	0	12.5859	0	10.4595	11.7911	0	10.857	0	12.1527	0	0	10.0915	0	12.0205	0	0	0	11.3087	9.81335	11.1916	0	0	12.8543	12.821
Amine oxidase [flavin-containing] A (EC 1.4.3.21) (EC 1.4.3.4) (Monoamine oxidase type A) (MAO-A)	MAOA	0	0	9.3587	8.79901	8.91449	8.26046	9.74702	8.85042	0	8.84425	0	0	0	7.32694	0	10.7002	11.4239	7.91479	9.28139	0	0	9.8018	11.0985	9.04856	7.40785	0	10.5336	10.795	8.13253	8.25459	9.12329	9.7301	0	0	7.73047	0	8.77749	8.40289	9.78913	8.68047	10.585	8.16429	0	10.1194	8.85945	8.59641	0	10.609
Mitochondrial basic amino acids transporter (Carnitine/acylcarnitine translocase-like) (CACT-like) (Mitochondrial carnitine/acylcarnitine carrier protein CACL) (Mitochondrial ornithine transporter 3) (Solute carrier family 25 member 29)	SLC25A29	0	0	0	0	0	0	0	0	0	0	0	0	0	0	0	0	0	0	0	0	0	0	0	0	0	0	8.44318	0	0	0	0	0	0	0	0	0	0	0	0	7.22462	10.1934	0	0	0	8.17946	0	0	10.8647
Putative coiled-coil-helix-coiled-coil-helix domain-containing protein CHCHD2P9, mitochondrial (Coiled-coil-helix-coiled-coil-helix domain-containing 2 pseudogene 9)	CHCHD2P9	0	0	0	0	0	0	0	0	0	0	7.41866	0	0	0	11.1556	9.64318	9.51654	0	0	0	8.24492	7.32667	0	0	0	0	10.8118	0	9.97295	0	0	0	8.08607	0	0	0	0	0	0	6.70288	0	0	9.30216	0	10.3688	11.5581	8.86498	9.84035
Monofunctional C1-tetrahydrofolate synthase, mitochondrial (EC 6.3.4.3) (Formyltetrahydrofolate synthetase)	MTHFD1L	0	0	0	0	0	0	0	0	0	0	0	0	0	0	0	0	0	0	0	0	0	0	0	0	0	0	0	0	0	0	0	0	0	0	0	0	0	0	0	0	0	0	0	0	0	8.29553	0	0
Angiogenin (EC 3.1.27.-) (Ribonuclease 5) (RNase 5)	ANG	0	0	9.53813	8.45696	9.50245	8.05277	9.52793	0	0	0	0	0	0	9.51306	0	0	0	9.30567	10.3767	0	0	9.75276	10.5179	9.53518	0	0	9.13261	0	9.43621	9.87933	9.36928	8.2272	0	8.93418	9.34914	9.06494	9.78064	0	0	8.41117	0	0	0	9.95053	0	9.97908	0	10.5533
WD repeat-containing protein 46 (WD repeat-containing protein BING4)	WDR46	0	0	0	0	0	0	0	0	0	9.28905	0	0	0	0	0	0	0	0	0	0	9.92742	0	0	0	0	0	0	0	0	0	0	0	0	0	7.60435	0	0	0	0	0	0	0	0	0	0	0	0	8.77327
Zinc finger matrin-type protein 2	ZMAT2	0	0	0	0	0	0	0	0	11.3056	0	0	0	11.4652	7.79169	0	0	7.81168	0	0	0	10.7023	0	0	0	0	0	0	11.5875	8.72254	0	0	0	0	0	9.67438	0	0	10.4471	0	0	0	0	0	0	0	8.63699	0	0
Multivesicular body subunit 12B (ESCRT-I complex subunit MVB12B) (Protein FAM125B)	MVB12B	0	0	0	0	0	0	0	0	0	0	0	0	0	0	0	0	8.56273	0	0	0	0	0	0	0	0	0	7.86638	0	0	0	0	0	0	8.61855	0	0	0	0	0	0	0	0	0	0	0	7.73035	0	9.41613
Transcription elongation factor A protein-like 2 (TCEA-like protein 2) (Transcription elongation factor S-II protein-like 2)	TCEAL2	0	0	0	0	0	0	0	9.86746	0	0	8.10219	0	0	0	0	0	9.71836	0	0	0	8.24173	0	0	0	0	0	8.88701	10.9365	9.64649	0	0	0	0	0	0	0	0	0	0	0	0	0	0	0	0	0	0	10.7756
Exosome complex component CSL4 (Exosome component 1)	EXOSC1	0	0	0	0	0	0	0	0	0	10.2767	0	0	0	0	0	0	0	0	0	0	0	0	0	0	0	0	9.03371	0	8.25709	0	0	0	0	0	0	8.49898	0	0	10.2133	0	0	0	8.43638	0	8.99091	0	8.96733	0
U6 snRNA-associated Sm-like protein LSm7	LSM7	0	8.54768	0	0	0	0	0	9.72367	9.72799	0	8.49997	0	0	0	9.63888	0	7.86818	7.22696	0	0	0	0	0	0	8.67554	0	0	0	8.74851	0	0	0	8.35882	0	0	7.3308	0	0	0	0	0	0	8.34225	0	0	9.33871	0	9.72581
Calmin (Calponin-like transmembrane domain protein)	CLMN	9.07315	11.4933	0	0	0	0	0	0	9.84427	0	8.42654	0	0	0	0	0	8.19329	8.61092	0	0	0	0	0	0	0	0	0	0	0	0	0	0	8.43319	0	0	0	7.85452	0	10.3144	0	0	0	8.05334	0	9.00731	8.98191	8.89075	0
Carbonic anhydrase 4 (EC 4.2.1.1) (Carbonate dehydratase IV) (Carbonic anhydrase IV) (CA-IV)	CA4	0	8.99315	0	8.2781	0	0	0	0	0	0	0	8.07155	0	8.89773	0	8.18635	12.2654	7.55632	8.4261	0	0	0	0	8.83651	0	0	0	8.37706	0	0	0	9.6162	0	6.81798	8.2276	0	9.73777	0	9.37959	0	0	0	0	0	8.85359	9.72382	9.08721	10.6646
Contactin-associated protein 1 (Caspr) (Caspr1) (Neurexin IV) (Neurexin-4) (p190)	CNTNAP1	0	0	0	8.64546	0	8.88497	0	0	0	0	0	0	0	0	0	9.53465	11.9758	0	9.15904	0	0	0	0	8.59308	0	0	8.53043	10.6313	0	9.77913	0	9.17733	0	8.7015	10.3658	0	7.91664	9.61509	0	9.2614	9.80309	9.318	0	9.15115	0	0	0	0
Carbonic anhydrase-related protein (CARP) (Carbonic anhydrase VIII) (CA-VIII)	CA8	10.9944	0	0	0	0	0	0	0	0	0	0	8.48915	0	0	0	0	0	0	0	0	9.63782	9.55457	7.42755	8.04889	0	0	0	0	0	0	0	0	0	7.70391	8.97344	7.9306	0	9.46851	0	0	0	9.89736	0	0	0	0	8.71396	0
Cdc42 effector protein 4 (Binder of Rho GTPases 4)	CDC42EP4	0	0	0	0	0	0	0	9.79805	0	0	0	8.33996	0	8.47487	11.9696	11.3826	9.68731	9.819	0	0	0	0	0	0	0	0	0	9.79802	0	8.15119	0	0	10.6717	0	0	0	0	9.38611	9.5663	0	9.63821	0	10.0128	0	9.22191	0	8.8129	10.2495
Splicing factor 3B subunit 6 (Pre-mRNA branch site protein p14) (SF3b 14 kDa subunit) (SF3B14a) (Spliceosome-associated protein, 14-kDa) (Splicing factor 3b, subunit 6, 14kDa)	SF3B6	0	0	0	0	0	0	0	0	10.0367	0	0	0	10.7133	0	0	0	0	0	0	0	8.03197	0	0	0	0	0	0	9.66727	0	0	0	0	0	0	7.67988	0	0	0	0	0	0	0	0	0	0	0	8.63245	0
Properdin (Complement factor P)	CFP	0	0	7.63654	9.14131	0	8.4112	10.725	0	0	9.60503	0	9.14984	0	10.3032	0	0	0	8.60307	9.23226	0	0	0	9.36619	9.51689	0	0	0	0	0	8.2581	8.41691	9.7206	0	0	0	0	0	0	0	7.16112	0	0	0	0	8.96015	8.76077	0	9.68622
Immunoglobulin kappa variable 1-12	IGKV1-12	0	0	9.34682	12.2425	12.6073	10.9193	0	0	0	0	0	0	0	9.65166	0	0	0	0	11.7503	0	0	0	10.0402	11.3573	0	0	7.98294	0	0	9.58123	10.9207	9.45261	0	9.64565	9.50009	0	0	10.149	0	0	0	0	0	13.2874	0	0	0	10.5428
Threonine--tRNA ligase 2, cytoplasmic (EC 6.1.1.3) (Threonyl-tRNA synthetase) (ThrRS) (Threonyl-tRNA synthetase protein 3)	TARS3	0	0	0	0	0	0	0	0	0	0	0	0	0	0	0	0	0	0	0	0	0	9.33718	0	0	0	0	0	0	0	0	10.1542	0	0	0	7.48301	0	0	0	0	0	0	0	0	0	0	0	0	0
Zinc transporter ZIP10 (Solute carrier family 39 member 10) (Zrt- and Irt-like protein 10) (ZIP-10)	SLC39A10	0	0	0	7.82856	0	0	0	0	0	0	0	0	0	0	0	0	9.5831	0	0	0	0	0	0	0	9.29558	0	0	0	0	0	0	0	0	0	8.85352	0	0	8.66612	9.34823	0	0	0	8.74084	8.44597	0	0	0	9.63537
Coagulation factor V (Activated protein C cofactor) (Proaccelerin, labile factor) [Cleaved into: Coagulation factor V heavy chain; Coagulation factor V light chain]	F5	0	0	8.91951	8.10179	10.9648	10.044	7.73658	0	0	7.99025	0	9.21386	0	10.3458	0	0	0	0	9.26901	8.67134	0	8.42191	8.89028	10.0912	0	0	0	7.23743	0	7.86156	9.06567	9.41523	0	9.36644	0	0	8.77217	0	0	8.78684	0	9.58185	0	9.14051	0	0	0	7.83375
HLA class II histocompatibility antigen, DQ alpha 1 chain (DC-1 alpha chain) (DC-alpha) (HLA-DCA) (MHC class II DQA1)	HLA-DQA1	0	0	10.532	9.30644	8.83744	12.2875	9.32394	0	0	8.34216	0	0	0	9.52194	0	0	0	0	10.4936	7.42092	0	8.69123	0	9.21237	9.01455	8.83674	0	8.047	8.66423	0	11.1594	0	0	8.48495	10.5099	0	0	0	0	8.1777	8.61648	10.4396	0	9.57638	0	0	0	0
Monocarboxylate transporter 5 (MCT 5) (Monocarboxylate transporter 4) (MCT 4) (Solute carrier family 16 member 4)	SLC16A4	9.47157	0	0	0	0	0	0	0	0	0	0	0	0	0	0	0	0	0	0	0	0	0	0	0	0	0	0	0	0	0	0	0	9.35453	0	0	0	0	0	0	0	0	10.3253	0	0	0	9.90802	0	0
Ribulose-phosphate 3-epimerase (EC 5.1.3.1) (Ribulose-5-phosphate-3-epimerase)	RPE	7.94564	0	0	0	0	0	0	0	0	0	8.07364	0	0	0	0	0	0	7.75442	0	0	0	0	0	0	0	0	8.75106	0	0	0	7.46303	0	7.15311	0	0	0	0	0	0	0	0	0	0	0	6.67336	7.24899	0	9.59388
Nuclear respiratory factor 1 (NRF-1) (Alpha palindromic-binding protein) (Alpha-pal)	NRF1	0	0	0	0	8.8927	10.8822	0	0	0	9.98719	0	7.95886	0	0	0	0	0	0	0	9.57145	0	9.04448	9.46221	0	10.604	10.392	0	0	0	8.99976	9.57105	8.90201	0	0	9.28176	0	8.86863	9.38476	10.4468	10.8074	8.81275	9.13605	0	8.99658	9.10362	0	0	0
BH3-interacting domain death agonist (p22 BID) (BID) [Cleaved into: BH3-interacting domain death agonist p15 (p15 BID); BH3-interacting domain death agonist p13 (p13 BID); BH3-interacting domain death agonist p11 (p11 BID)]	BID	0	0	0	0	0	0	0	0	0	0	0	0	0	9.79349	8.68396	0	0	0	0	0	0	0	0	0	0	0	9.15519	8.68124	0	0	0	0	0	8.47581	0	0	0	0	0	0	0	0	0	0	0	0	7.15977	0
Tyrosine-protein kinase Fes/Fps (EC 2.7.10.2) (Feline sarcoma/Fujinami avian sarcoma oncogene homolog) (Proto-oncogene c-Fes) (Proto-oncogene c-Fps) (p93c-fes)	FES	0	0	0	0	0	0	0	0	0	0	0	0	0	0	0	0	0	0	0	0	0	0	0	0	0	0	8.64136	0	0	0	0	0	0	0	0	0	0	0	0	0	0	0	0	0	0	0	0	0
ER membrane protein complex subunit 8 (Neighbor of COX4) (Protein FAM158B)	EMC8	0	0	0	0	0	0	0	0	7.81146	0	0	0	0	0	10.074	8.48552	0	0	0	0	0	0	0	0	0	0	0	9.02147	0	0	0	0	0	0	0	0	0	0	0	0	0	0	0	0	0	9.42961	0	0
Transmembrane protein 51	TMEM51	0	0	0	0	0	0	0	0	0	0	0	0	0	0	0	0	0	0	0	9.10247	0	0	0	0	0	0	0	0	0	0	0	0	0	0	0	0	9.06914	10.776	0	0	0	10.5256	0	0	0	0	0	0
Phosducin-like protein 3 (HTPHLP) (PhPL3) (Viral IAP-associated factor 1) (VIAF-1)	PDCL3	0	0	0	0	0	0	0	0	0	0	0	0	0	0	0	0	0	0	0	0	0	0	0	0	0	0	0	0	0	0	0	0	0	7.90169	0	0	0	0	9.94494	0	0	0	0	0	0	0	8.44812	9.5439
Deoxynucleotidyltransferase terminal-interacting protein 2 (Estrogen receptor-binding protein) (LPTS-interacting protein 2) (LPTS-RP2) (Terminal deoxynucleotidyltransferase-interacting factor 2) (TdIF2) (TdT-interacting factor 2)	DNTTIP2	7.86727	0	0	0	0	0	0	0	0	10.8597	8.68168	0	0	0	0	0	0	8.1717	0	7.65817	7.46096	0	0	0	9.2301	0	0	0	7.64036	0	0	0	0	0	0	8.43471	0	0	0	8.79158	0	0	0	0	7.89198	7.7891	8.01033	0
Tumor necrosis factor ligand superfamily member 12 (APO3 ligand) (TNF-related weak inducer of apoptosis) (TWEAK) [Cleaved into: Tumor necrosis factor ligand superfamily member 12, membrane form; Tumor necrosis factor ligand superfamily member 12, secreted form]	TNFSF12	0	10.1301	0	9.64724	0	8.97047	0	0	8.83766	0	0	0	10.0122	0	9.44884	0	0	7.24701	9.50044	0	0	0	0	0	0	0	0	0	8.33592	0	8.71445	0	0	7.26061	8.01053	0	8.52899	0	0	8.60326	0	0	0	0	8.27823	8.82896	8.4566	8.04497
Charged multivesicular body protein 7 (Chromatin-modifying protein 7)	CHMP7	0	10.0833	0	0	0	0	0	0	0	0	0	0	0	0	0	0	8.20772	0	0	0	0	0	0	0	0	0	0	0	0	0	0	0	0	7.61795	0	0	0	0	0	0	0	0	0	0	0	0	7.11957	10.9155
tRNA (32-2'-O)-methyltransferase regulator THADA (Gene inducing thyroid adenomas protein) (Thyroid adenoma-associated protein)	THADA	0	0	0	0	0	0	0	0	0	0	0	0	0	8.07298	0	0	0	0	0	0	0	0	0	0	0	0	0	0	0	0	0	8.42067	0	0	0	0	0	0	10.0919	0	0	0	0	0	0	0	0	10.7108
Neogenin (Immunoglobulin superfamily DCC subclass member 2)	NEO1	0	0	0	7.98915	0	9.20159	8.63365	0	0	7.31887	0	0	0	0	0	9.45692	10.9113	0	7.48437	0	0	0	8.74263	0	0	7.69088	0	0	0	7.63246	9.17242	9.78317	0	8.26266	0	9.17152	0	7.42865	0	7.75168	9.98547	0	0	8.86334	0	0	0	8.12098
Glutathione S-transferase Mu 5 (EC 2.5.1.18) (GST class-mu 5) (GSTM5-5)	GSTM5	0	8.48142	7.65116	6.70889	0	0	6.68541	0	0	0	0	0	0	0	0	8.56812	0	0	7.33736	0	0	7.72964	0	7.72312	7.90675	0	8.38018	9.17849	0	0	8.24289	0	8.85294	6.48598	0	7.32865	0	0	7.55126	8.05283	11.7775	0	8.70609	7.36877	0	0	0	0
Trafficking protein particle complex subunit 12 (Tetratricopeptide repeat protein 15) (TPR repeat protein 15) (TTC-15) (Trafficking of membranes and mitosis)	TRAPPC12	0	0	0	0	0	0	0	0	0	0	0	0	0	0	0	0	0	0	0	0	0	0	0	0	0	0	0	0	0	0	0	0	0	0	8.51114	0	0	0	0	0	0	0	0	0	0	0	0	0
Probable tRNA(His) guanylyltransferase (EC 2.7.7.79) (Induced in high glucose-1) (IHG-1) (Interphase cytoplasmic foci protein 45) (tRNA-histidine guanylyltransferase)	THG1L	0	0	7.54906	0	0	0	0	0	0	0	0	0	0	8.40115	0	0	0	0	0	0	0	0	0	8.70682	0	0	7.30602	0	0	0	0	0	0	0	0	0	0	0	0	0	0	0	0	0	0	0	0	10.8625
ATP-dependent RNA helicase DDX42 (EC 3.6.4.13) (DEAD box protein 42) (RNA helicase-like protein) (RHELP) (RNA helicase-related protein) (RNAHP) (SF3b DEAD box protein) (Splicing factor 3B-associated 125 kDa protein) (SF3b125)	DDX42	0	0	0	0	0	0	0	0	0	0	0	0	0	0	0	0	0	0	0	0	11.1573	9.48593	0	0	10.6108	0	0	0	0	8.36159	9.60327	0	0	0	0	0	0	10.4673	0	10.4986	0	0	0	0	0	0	0	10.8837
Voltage-dependent calcium channel subunit alpha-2/delta-3 (Voltage-gated calcium channel subunit alpha-2/delta-3) [Cleaved into: Voltage-dependent calcium channel subunit alpha-2-3; Voltage-dependent calcium channel subunit delta-3]	CACNA2D3	7.65425	9.88714	0	0	0	0	0	0	0	0	8.28851	0	10.4824	0	0	0	9.72755	0	0	0	0	0	0	0	0	0	0	9.37575	8.59644	0	0	0	7.29568	0	0	0	0	0	0	0	0	0	7.69309	0	7.26621	8.18662	9.39421	9.69614
MOB kinase activator 2 (HCCA2) (Mob2 homolog) (Mps one binder kinase activator-like 2)	MOB2	0	0	0	0	0	0	10.023	0	0	0	0	8.66187	0	0	0	0	0	0	0	8.68079	0	10.1539	0	8.09765	10.9456	0	9.15353	0	9.79837	9.32013	9.23543	0	9.5006	0	9.53312	0	8.29867	10.7246	0	12.0082	9.97441	0	0	10.2406	9.76708	9.16308	0	0
Arginine--tRNA ligase, cytoplasmic (EC 6.1.1.19) (Arginyl-tRNA synthetase) (ArgRS)	RARS1	9.27934	0	0	0	0	0	0	11.2796	9.01864	0	0	9.69209	8.71817	0	0	10.2049	9.97472	12.2871	0	11.9239	0	0	8.10806	0	9.97057	10.8679	9.53619	9.42681	11.0756	10.9072	0	0	10.3196	10.1836	0	9.85382	9.4478	10.4387	9.28892	9.76019	9.83843	0	10.2075	9.87061	10.6788	10.883	10.7317	0
Ankyrin repeat domain-containing protein 22	ANKRD22	0	0	0	0	0	0	0	0	0	0	0	0	0	0	0	0	0	0	0	0	9.872	0	0	0	0	0	0	0	0	0	0	0	0	0	7.4877	0	0	0	0	0	0	0	0	0	0	0	0	0
Low affinity immunoglobulin gamma Fc region receptor II-b (IgG Fc receptor II-b) (CDw32) (Fc-gamma RII-b) (Fc-gamma-RIIb) (FcRII-b) (CD antigen CD32)	FCGR2B	0	0	7.96269	0	8.178	0	11.7526	0	0	9.96625	0	0	0	7.29813	0	0	0	0	7.28592	0	8.07252	11.7497	9.66978	7.90826	0	0	8.95486	0	0	8.00633	7.13265	8.67124	0	0	8.97296	0	7.49751	12.8325	10.2376	8.03144	0	10.9185	0	0	0	0	0	0
Mortality factor 4-like protein 1 (MORF-related gene 15 protein) (MRG15) (Protein MSL3-1) (Transcription factor-like protein MRG15)	MORF4L1	0	9.62978	0	0	0	0	0	0	10.0273	0	0	0	0	0	0	0	0	0	0	0	9.58225	0	0	0	9.80811	0	0	0	0	0	0	0	0	0	0	0	7.94523	0	0	0	0	0	0	0	0	0	9.4106	0
Mothers against decapentaplegic homolog 5 (MAD homolog 5) (Mothers against DPP homolog 5) (JV5-1) (SMAD family member 5) (SMAD 5) (Smad5) (hSmad5)	SMAD5	0	0	0	0	0	0	0	0	0	0	0	0	0	0	10.9886	0	0	0	0	0	0	0	0	0	0	0	0	0	0	0	0	0	0	0	0	0	0	0	0	0	0	0	0	0	8.91507	0	0	11.3065
MOB kinase activator 3A (MOB-LAK) (Mob1 homolog 2A) (Mps one binder kinase activator-like 2A)	MOB3A	0	0	0	0	0	8.08492	0	0	0	0	0	0	11.3767	8.50512	0	0	0	0	8.11075	0	0	0	0	10.2348	0	0	0	0	0	0	0	0	0	0	6.33002	0	8.59172	0	0	0	0	0	0	0	0	8.97301	0	0
Aspartoacylase (EC 3.5.1.15) (Aminoacylase-2) (ACY-2)	ASPA	8.17609	0	0	0	0	0	0	0	11.2919	8.20652	0	0	0	0	0	0	8.88558	0	0	7.41138	8.83393	0	0	0	0	0	0	10.2288	0	0	0	7.86228	0	8.36491	0	0	7.96849	0	0	0	0	10.547	0	0	0	0	0	0
THO complex subunit 7 homolog (Functional spliceosome-associated protein 24) (fSAP24) (Ngg1-interacting factor 3-like protein 1-binding protein 1) (NIF3L1-binding protein 1) (hTREX30)	THOC7	0	0	0	0	0	0	0	10.3646	10.0272	0	9.35261	0	9.25456	0	11.091	8.5896	7.79924	8.64133	0	0	0	0	0	0	8.40547	0	8.1968	0	0	0	0	0	8.98937	0	0	8.20221	0	0	0	6.62263	0	0	9.23069	0	8.91129	9.25895	0	9.99112
Receptor-binding cancer antigen expressed on SiSo cells (Cancer-associated surface antigen RCAS1) (Estrogen receptor-binding fragment-associated gene 9 protein)	EBAG9	0	0	0	0	0	0	0	0	0	0	0	0	0	0	0	0	0	0	0	0	0	0	0	0	8.51313	0	8.00982	0	0	0	0	0	0	0	0	0	0	10.238	0	0	0	0	0	0	0	0	0	0
Prefoldin subunit 2	PFDN2	10.0959	10.6654	8.5285	0	0	0	8.99782	10.9303	9.22212	0	8.09142	0	8.81235	9.09886	10.4024	9.82596	0	8.96484	7.36451	0	0	0	0	0	8.26981	8.50307	9.96596	9.77256	0	0	0	0	8.01183	0	8.90952	8.89171	0	0	0	8.13249	0	0	8.41146	0	8.94616	10.0071	9.39445	0
Nuclear factor of activated T-cells, cytoplasmic 2 (NF-ATc2) (NFATc2) (NFAT pre-existing subunit) (NF-ATp) (T-cell transcription factor NFAT1)	NFATC2	0	0	0	0	0	0	13.7436	0	0	0	0	0	0	0	0	0	0	0	0	0	0	0	9.64257	0	0	0	0	0	0	0	0	0	0	0	0	0	0	0	0	0	0	0	0	0	0	8.69608	0	0
Pyrroline-5-carboxylate reductase 3 (P5C reductase 3) (P5CR 3) (EC 1.5.1.2) (Pyrroline-5-carboxylate reductase-like protein)	PYCR3	0	0	9.32021	8.91845	0	8.49023	0	0	0	0	0	0	0	9.62228	0	0	9.21878	0	9.35264	0	8.07752	0	8.26326	0	0	0	0	0	0	0	8.45572	9.65505	0	0	0	0	8.60818	0	0	8.81294	9.64985	0	0	0	0	0	0	0
Protein-arginine deiminase type-4 (EC 3.5.3.15) (HL-60 PAD) (Peptidylarginine deiminase IV) (Protein-arginine deiminase type IV)	PADI4	0	8.9122	8.8704	7.7128	9.95659	8.54365	0	0	0	0	0	9.07294	0	11.329	0	9.14741	8.31886	0	7.8678	8.66921	0	9.27696	8.72948	8.75891	0	0	0	9.3142	0	0	8.45349	9.89639	0	7.5863	8.76448	0	8.80343	0	0	7.14241	0	9.62448	0	9.15034	8.53982	0	0	9.25311
Glycerol kinase (Glycerokinase) (EC 2.7.1.30) (ATP:glycerol 3-phosphotransferase)	GK	0	0	0	0	0	0	0	0	0	0	0	8.32938	0	0	0	0	0	0	0	0	0	0	0	0	0	0	0	0	0	0	0	0	9.37919	0	8.51162	0	0	0	8.61217	0	0	0	9.87416	0	9.47599	0	0	10.5905
Pumilio homolog 1 (HsPUM) (Pumilio-1)	PUM1	0	0	0	0	0	0	0	0	0	0	0	0	0	0	0	0	0	0	0	0	0	0	0	0	8.25183	0	0	0	0	0	0	0	0	0	0	0	8.45227	0	0	0	8.53817	0	0	0	0	0	0	0
Ras-related protein Rab-3A	RAB3A	8.87159	0	0	9.32088	8.35388	0	0	0	0	0	0	0	0	0	0	8.98798	12.8553	0	10.7561	0	0	10.0112	0	8.90973	0	0	0	11.3554	7.32525	0	0	9.15278	0	0	0	7.82584	8.60605	0	11.3233	0	0	0	7.43284	0	0	0	0	8.57944
U8 snoRNA-decapping enzyme (EC 3.6.1.62) (IDP phosphatase) (IDPase) (EC 3.6.1.64) (Inosine diphosphate phosphatase) (Nucleoside diphosphate-linked moiety X motif 16) (Nudix motif 16) (Nudix hydrolase 16) (U8 snoRNA-binding protein H29K) (m7GpppN-mRNA hydrolase)	NUDT16	0	0	0	0	0	0	0	0	0	0	0	0	0	0	0	0	0	0	0	0	6.3988	0	0	0	0	0	0	0	0	0	0	0	0	6.73209	0	0	0	0	0	0	0	0	0	0	0	0	0	0
Glycophorin-C (Glycoconnectin) (Glycophorin-D) (GPD) (Glycoprotein beta) (PAS-2') (Sialoglycoprotein D) (CD antigen CD236)	GYPC	0	0	7.10063	8.85884	0	7.77981	10.1083	8.57438	0	11.8224	0	11.382	0	0	0	7.3153	5.92387	0	7.93563	0	5.20581	11.8707	7.69864	9.04627	0	0	8.60034	0	0	0	9.18361	8.78403	0	0	0	6.96225	8.2991	12.1111	11.7095	0	0	11.2548	9.7081	0	7.41867	6.89154	0	0
Coiled-coil domain-containing protein 127	CCDC127	0	10.4736	0	0	0	0	0	10.4057	9.95846	0	7.92282	0	9.27861	0	9.96592	8.26319	10.95	8.97782	0	0	0	0	0	0	0	0	0	10.6389	0	0	0	0	9.0649	7.9666	0	0	0	0	0	0	0	0	8.63992	0	8.74831	12.0148	7.93111	8.79189
C5a anaphylatoxin chemotactic receptor 1 (C5a anaphylatoxin chemotactic receptor) (C5a-R) (C5aR) (CD antigen CD88)	C5AR1	0	0	8.93843	0	10.0009	0	8.70314	0	0	9.3865	0	8.79359	0	9.69888	0	0	0	0	8.88005	0	9.37578	9.49382	8.90186	0	0	0	0	0	0	8.64836	0	8.8693	0	0	8.39812	0	0	9.18312	8.76378	9.36704	0	9.61148	0	9.1858	0	0	0	8.78297
U5 small nuclear ribonucleoprotein TSSC4 (Tumor-suppressing STF cDNA 4 protein) (Tumor-suppressing subchromosomal transferable fragment candidate gene 4 protein)	TSSC4	0	0	0	0	0	9.27175	9.72569	0	0	8.86482	0	9.92331	0	0	0	0	0	0	0	9.26449	0	9.96567	0	0	9.68381	10.6394	0	0	0	7.3464	0	0	0	0	7.23769	0	9.31861	9.75379	10.0252	9.93799	10.2267	9.49676	0	9.55943	0	0	9.96344	0
UPF0598 protein C8orf82	C8orf82	0	0	0	0	0	0	0	0	0	0	0	0	0	0	10.0329	8.61121	0	8.34397	0	0	7.88836	0	6.89657	0	0	0	0	10.2875	0	0	0	0	0	7.96228	0	0	0	0	0	0	0	0	0	0	9.39947	11.3029	0	8.91204
Tudor-interacting repair regulator protein (NUDT16-like protein 1) (Protein syndesmos)	NUDT16L1	0	0	0	0	0	0	0	0	9.30598	0	0	0	0	0	0	7.58683	0	0	0	0	7.47108	0	0	0	0	0	0	0	0	0	0	0	0	8.8846	0	0	0	0	0	0	9.74507	0	8.01209	0	0	0	0	0
2-amino-3-ketobutyrate coenzyme A ligase, mitochondrial (AKB ligase) (EC 2.3.1.29) (Aminoacetone synthase) (Glycine acetyltransferase)	GCAT	0	0	0	0	0	0	0	0	0	0	0	0	0	0	0	0	0	0	0	0	0	0	0	0	0	0	0	0	0	0	0	0	0	0	0	0	0	0	0	0	0	0	0	0	8.07716	6.30186	0	8.46225
Protein ENL (YEATS domain-containing protein 1)	MLLT1	0	0	0	0	0	0	0	0	0	0	8.13136	8.2319	0	0	0	0	0	0	0	0	0	0	0	7.32224	0	9.92026	8.19468	0	8.63718	0	0	0	8.08353	0	0	8.87196	0	0	9.85563	0	0	0	7.71212	0	7.98577	8.80324	0	9.96023
Immunoglobulin heavy variable 1-2 (Ig heavy chain V-I region ND) (Ig heavy chain V-I region V35)	IGHV1-2	0	0	9.79489	12.3225	10.8733	12.6156	11.7602	0	0	0	0	13.7546	0	11.0733	0	0	0	0	12.7769	0	8.24939	0	12.0203	12.086	0	0	0	0	0	9.49268	11.864	11.2482	0	0	7.93678	0	10.66	11.9793	0	9.91894	0	10.9909	0	10.4969	0	0	0	0
Caspase activity and apoptosis inhibitor 1 (Conserved anti-apoptotic protein) (CAAP)	CAAP1	0	0	0	0	0	0	0	0	0	8.18632	0	0	0	5.79958	0	0	8.30318	0	0	0	0	0	6.77058	8.09747	8.11106	8.75752	10.5349	0	0	0	0	0	0	0	0	0	5.92762	0	8.63229	7.01882	9.14314	0	7.06695	0	0	0	0	10.0232
Hydroxymethylglutaryl-CoA synthase, cytoplasmic (HMG-CoA synthase) (EC 2.3.3.10) (3-hydroxy-3-methylglutaryl coenzyme A synthase)	HMGCS1	0	0	0	0	0	0	0	0	0	0	0	8.39909	0	0	0	0	9.98679	0	0	0	0	9.40962	0	0	0	10.3739	0	0	0	7.99223	0	0	0	0	0	9.30349	0	0	9.80527	7.75228	0	0	0	0	0	0	0	0
Bifunctional peptidase and (3S)-lysyl hydroxylase JMJD7 (EC 1.14.11.63) (EC 3.4.-.-) (JmjC domain-containing protein 7) (Jumonji domain-containing protein 7) (L-lysine (3S)-hydroxylase JMJD7)	JMJD7	0	0	0	0	0	0	0	0	0	0	0	0	0	0	0	0	0	0	0	0	0	0	0	0	0	0	0	0	8.89985	0	0	0	0	8.16166	0	0	0	0	0	0	10.6926	0	10.3055	10.1557	0	0	8.7087	0
Immunoglobulin-binding protein 1 (B-cell signal transduction molecule alpha 4) (Protein alpha-4) (CD79a-binding protein 1) (Protein phosphatase 2/4/6 regulatory subunit) (Renal carcinoma antigen NY-REN-16)	IGBP1	0	0	0	0	7.87338	0	0	9.59509	0	0	0	0	0	9.16823	9.69342	0	0	7.39443	0	0	0	0	0	0	0	0	10.1967	0	0	0	0	0	8.44041	0	0	8.93176	0	0	0	0	8.30537	0	7.01099	0	9.30714	0	8.35924	0
Unconventional prefoldin RPB5 interactor 1 (Protein NNX3) (Protein phosphatase 1 regulatory subunit 19) (RNA polymerase II subunit 5-mediating protein) (RPB5-mediating protein)	URI1	0	0	0	0	0	0	0	0	0	0	0	10.4012	0	0	0	0	0	0	0	0	0	0	0	0	0	13.0212	0	0	0	0	0	0	0	0	0	0	0	0	0	0	0	0	0	0	0	0	0	11.027
Proline-rich AKT1 substrate 1 (40 kDa proline-rich AKT substrate)	AKT1S1	0	10.6026	0	0	0	0	8.75622	0	11.2103	7.48076	10.9882	10.0086	10.5457	0	9.61877	0	0	10.4506	0	0	0	0	0	0	9.23463	0	9.01911	0	10.3758	7.51415	0	0	10.3801	0	7.70592	10.1378	0	10.3099	7.69191	0	8.32753	7.99687	10.2535	7.73923	10.3046	9.71906	11.4982	9.31957
ADP-ribosylation factor-like protein 15 (ADP-ribosylation factor-related protein 2) (ARF-related protein 2)	ARL15	0	0	0	0	0	0	0	11.688	0	0	0	0	0	7.82611	11.982	10.0611	8.33708	9.76187	0	0	0	0	9.01673	0	10.5611	0	0	0	0	0	0	0	0	0	0	0	10.0277	0	0	7.88952	0	0	8.10952	10.6492	0	8.66806	0	0
Tetraspanin-7 (Tspan-7) (Cell surface glycoprotein A15) (Membrane component chromosome X surface marker 1) (T-cell acute lymphoblastic leukemia-associated antigen 1) (TALLA-1) (Transmembrane 4 superfamily member 2) (CD antigen CD231)	TSPAN7	0	0	0	0	9.17549	0	9.8014	10.0168	0	0	0	0	0	8.04433	0	7.5384	0	0	8.36143	0	7.3374	0	9.87032	8.93819	0	0	0	0	8.26124	0	8.28304	8.04297	0	7.12646	0	0	0	9.82158	9.18264	0	0	11.282	0	0	7.51528	7.12197	7.41944	8.94051
Protein jagunal homolog 1	JAGN1	0	0	0	0	0	0	0	11.0437	0	0	0	0	0	8.75115	10.347	8.12677	8.65935	0	0	0	0	0	0	0	8.13285	8.45177	8.28681	0	8.23079	0	8.66732	0	10.5729	8.9908	8.3511	0	0	8.29174	0	0	8.1664	0	0	0	0	10.1531	9.50527	0
3-oxoacyl-[acyl-carrier-protein] synthase, mitochondrial (EC 2.3.1.41) (Beta-ketoacyl-ACP synthase)	OXSM	0	0	0	0	0	0	0	0	0	0	0	0	0	0	0	0	0	0	0	0	8.00514	0	0	0	0	0	0	0	0	0	0	0	0	0	0	0	0	0	0	0	0	0	0	0	0	0	0	0
Small ribosomal subunit protein mS25 (28S ribosomal protein S25, mitochondrial) (MRP-S25) (S25mt)	MRPS25	0	0	0	0	0	0	0	9.34176	0	0	0	0	9.92209	0	9.86188	0	0	0	0	0	0	0	0	0	0	7.84937	8.61955	0	0	0	0	0	0	0	0	0	0	0	0	0	0	0	7.86479	0	0	0	9.07765	0
Gamma-aminobutyric acid receptor-associated protein-like 1 (Early estrogen-regulated protein) (GABA(A) receptor-associated protein-like 1) (Glandular epithelial cell protein 1) (GEC-1)	GABARAPL1	8.9961	10.8701	0	0	0	0	0	10.5755	10.7921	0	10.1192	0	11.6747	7.50523	11.2456	10.4609	11.8248	10.6079	0	0	9.21957	0	0	0	0	0	9.93083	11.731	10.2812	0	0	7.45351	9.9859	0	0	9.89761	7.02318	0	0	0	0	0	10.2073	0	10.2386	10.8877	10.0889	11.973
Keratinocyte-associated transmembrane protein 2	KCT2	0	0	0	0	0	0	0	0	0	0	0	0	0	0	0	0	0	0	0	0	0	0	0	0	0	0	0	0	0	0	0	0	0	0	0	0	0	0	10.3247	11.3471	0	0	0	0	0	0	0	0
Abasic site processing protein HMCES (EC 4.-.-.-) (Embryonic stem cell-specific 5-hydroxymethylcytosine-binding protein) (ES cell-specific 5hmC-binding protein) (Peptidase HMCES) (EC 3.4.-.-) (SRAP domain-containing protein 1)	HMCES	0	0	0	0	0	0	0	0	0	0	0	0	0	0	0	0	0	0	0	0	8.74961	0	0	0	0	0	0	0	0	0	0	0	0	0	0	0	0	0	0	0	0	0	0	0	0	0	0	0
Glycerol-3-phosphate dehydrogenase [NAD(+)], cytoplasmic (GPD-C) (GPDH-C) (EC 1.1.1.8)	GPD1	8.86594	8.94571	0	0	7.831	0	0	0	0	0	0	0	0	0	0	0	10.1495	0	0	0	0	0	0	0	0	0	0	10.4478	9.40264	0	0	10.6539	9.55619	10.8454	0	0	0	0	10.7175	0	0	7.41687	9.22731	8.12151	9.68297	8.74954	7.40548	0
Multifunctional methyltransferase subunit TRM112-like protein (tRNA methyltransferase 112 homolog)	TRMT112	8.8055	10.9866	0	0	0	0	0	10.6396	11.0549	0	0	0	10.5895	0	11.2328	8.34853	0	9.93358	0	0	9.83688	0	0	0	0	0	0	10.0581	0	0	0	0	8.90904	0	0	9.57678	0	0	0	0	0	0	8.51271	0	10.077	10.5805	9.23723	0
Small VCP/p97-interacting protein	SVIP	0	0	0	0	0	0	0	0	0	0	0	10.1621	0	9.06228	0	9.82408	10.4882	0	0	8.08908	11.391	0	0	0	9.41362	10.3092	0	0	0	0	0	0	0	0	0	0	0	9.62655	0	0	0	0	0	0	0	0	0	9.24072
High mobility group protein HMGI-C (High mobility group AT-hook protein 2)	HMGA2	0	0	0	0	0	0	0	0	0	8.96468	9.93343	8.04613	0	0	0	8.02148	0	0	0	0	0	0	0	0	0	8.32043	0	0	0	0	0	0	0	0	0	0	0	0	0	0	0	0	0	0	0	0	0	0
Transmembrane protein with metallophosphoesterase domain (EC 3.1.-.-)	TMPPE	0	0	0	8.73309	11.6529	9.99788	0	0	0	0	0	9.30145	0	0	0	9.56849	0	9.95904	0	0	0	11.3074	0	10.0264	0	0	0	0	0	10.1634	0	10.3014	0	0	8.33372	0	0	11.9034	0	0	11.0897	0	0	0	10.4083	0	0	12.1522
COMM domain-containing protein 7	COMMD7	0	0	0	0	0	0	0	0	0	0	0	0	0	0	0	0	0	0	0	7.6459	0	0	0	0	8.84875	0	0	0	0	0	0	0	0	0	7.49293	0	0	0	8.69752	0	0	0	0	0	0	0	0	0
Autophagy-related protein 101	ATG101	0	0	0	0	0	0	0	0	0	0	0	0	0	0	0	0	0	0	0	0	0	0	0	0	0	0	0	0	0	0	0	0	0	0	0	0	0	0	0	0	0	0	0	0	0	0	0	0
Ribonuclease P protein subunit p29 (hPOP4)	POP4	0	0	0	0	0	0	0	0	0	9.87114	0	0	0	0	0	0	0	0	0	0	8.54629	9.68534	0	0	0	0	0	0	0	0	0	0	0	0	0	0	0	11.135	11.0928	7.50353	0	0	0	0	0	0	0	0
CD109 antigen (150 kDa TGF-beta-1-binding protein) (C3 and PZP-like alpha-2-macroglobulin domain-containing protein 7) (Platelet-specific Gov antigen) (p180) (r150) (CD antigen CD109)	CD109	0	0	9.77328	9.23463	8.31058	9.88535	9.64992	0	0	8.13965	0	7.61702	0	9.12519	9.83145	0	0	0	8.88293	8.3775	0	0	10.8439	9.14812	7.67936	0	0	0	0	8.18989	10.0707	10.0755	0	0	8.73166	0	9.91772	8.41159	7.65232	7.99849	8.01626	0	0	8.98909	0	0	0	9.19005
Multimerin-1 (EMILIN-4) (Elastin microfibril interface located protein 4) (Elastin microfibril interfacer 4) (Endothelial cell multimerin) [Cleaved into: Platelet glycoprotein Ia*; 155 kDa platelet multimerin (p-155) (p155)]	MMRN1	0	0	9.05203	7.73562	11.3666	10.2116	9.24048	0	0	9.11764	0	8.7118	0	11.2593	8.32421	9.60966	0	0	9.1848	8.15182	0	8.75319	9.21724	9.61355	0	0	0	0	0	8.24704	9.18233	9.35744	0	9.17866	0	0	9.57297	9.11064	0	7.65446	0	10.1542	0	9.94415	8.70843	7.60049	0	10.1864
Maestro heat-like repeat-containing protein family member 1 (HEAT repeat-containing protein 7A)	MROH1	0	0	0	0	0	6.71144	0	0	0	0	0	0	0	0	0	0	0	0	0	0	0	0	7.38559	0	0	0	0	0	0	0	0	0	0	0	6.64157	0	0	8.88931	0	0	0	0	0	0	0	0	0	0
Cytochrome c oxidase subunit 6A1, mitochondrial (Cytochrome c oxidase polypeptide VIa-liver) (Cytochrome c oxidase subunit VIA-liver) (COX VIa-L)	COX6A1	11.7916	13.1066	0	0	0	0	0	12.0746	0	0	11.3206	0	12.1769	0	11.4926	10.7035	11.0916	11.6759	7.16489	0	9.01303	0	0	0	0	0	0	12.9103	10.7159	0	0	0	11.9552	7.01584	0	12.5001	0	0	0	0	0	0	9.65648	0	11.0246	11.6325	10.6767	0
Protein cereblon	CRBN	0	0	0	0	0	0	0	0	0	0	0	0	0	0	0	0	0	0	0	0	0	0	0	0	0	0	0	0	0	0	0	0	0	8.31742	0	0	0	0	0	8.30345	0	0	0	0	0	0	0	0
Cytochrome c oxidase assembly protein COX20, mitochondrial	COX20	11.9866	12.5361	0	0	0	0	0	12.7842	11.5467	0	9.10794	0	0	0	11.6817	10.2869	10.4117	11.0595	8.02005	0	9.79034	0	0	0	0	0	0	11.9588	0	7.97121	0	0	12.33	9.32758	0	10.6767	0	0	0	0	0	0	11.9754	11.1937	10.7382	12.2832	10.8161	0
Cholinesterase (EC 3.1.1.8) (Acylcholine acylhydrolase) (Butyrylcholine esterase) (Choline esterase II) (Pseudocholinesterase)	BCHE	0	0	9.20579	8.54836	12.1462	11.3002	10.7816	0	0	0	0	8.85525	0	10.3648	0	0	0	0	9.35272	0	0	0	9.64921	10.5117	0	0	0	0	0	7.07635	9.92431	9.43271	0	0	8.86974	0	8.97653	9.34821	0	0	0	10.8139	0	9.64343	0	0	0	0
Glucoside xylosyltransferase 2 (EC 2.4.2.42) (Glycosyltransferase 8 domain-containing protein 4)	GXYLT2	0	0	0	0	0	0	0	0	0	0	0	0	0	0	0	0	0	0	0	0	0	7.82424	0	0	9.48482	0	9.5925	0	0	7.67699	0	0	0	0	8.11571	0	8.93166	0	0	0	9.15703	0	0	0	0	0	0	0
Coagulation factor XIII B chain (Fibrin-stabilizing factor B subunit) (Protein-glutamine gamma-glutamyltransferase B chain) (Transglutaminase B chain)	F13B	0	8.94399	8.49825	10.3136	9.96703	9.27177	9.30032	0	0	0	8.23611	9.50223	0	9.48634	0	9.28881	0	0	10.0891	8.3822	0	8.64562	9.3465	10.4167	0	0	0	8.00984	0	8.84263	9.20475	9.55836	0	9.32379	9.65362	0	9.10738	8.59623	0	0	0	9.76258	0	9.46197	8.42655	0	0	0
Transmembrane protein 100	TMEM100	0	10.2413	0	0	10.2642	0	0	0	0	0	0	0	0	8.22844	0	0	0	8.78729	0	0	0	8.81051	8.73609	0	10.1697	11.4362	0	0	10.2476	0	0	0	8.25029	0	0	9.04109	0	0	8.86824	8.40661	0	0	10.2437	0	9.23744	9.94648	0	13.1065
Immunoglobulin lambda constant 7 (Ig lambda-7 chain C region)	IGLC7	0	0	9.70399	0	0	0	11.417	0	0	0	0	0	0	9.65235	0	0	7.86139	8.95879	0	0	0	9.17174	0	10.7979	0	0	0	0	7.72809	7.38794	10.7951	0	0	0	0	0	0	8.7996	9.25865	0	0	10.2081	9.658	8.84157	0	8.74327	0	0
Lipid droplet-regulating VLDL assembly factor AUP1 (Ancient ubiquitous protein 1)	AUP1	0	0	0	0	0	0	0	0	0	0	0	0	0	0	0	0	9.35963	9.22451	0	0	0	0	0	0	0	0	9.08605	10.7966	8.79805	0	0	0	8.43633	0	0	10.0185	7.45095	9.90323	0	9.5848	0	0	0	9.38871	0	8.94645	10.0733	0
F-actin-uncapping protein LRRC16A (CARMIL homolog) (Capping protein regulator and myosin 1 linker protein 1) (Capping protein, Arp2/3 and myosin-I linker homolog 1) (Capping protein, Arp2/3 and myosin-I linker protein 1) (Leucine-rich repeat-containing protein 16A)	CARMIL1	0	0	0	0	0	0	0	9.63489	0	0	0	0	0	0	0	0	0	0	0	0	0	0	0	0	0	0	0	0	0	0	0	0	0	0	0	0	0	0	0	0	0	0	9.28329	0	9.45808	10.4236	0	9.44197
YTH domain-containing family protein 1 (DF1) (Dermatomyositis associated with cancer putative autoantigen 1) (DACA-1)	YTHDF1	0	0	0	0	0	0	0	0	0	0	0	7.01834	0	0	0	0	0	0	0	0	0	0	0	0	0	0	0	0	0	0	0	0	0	0	0	0	0	0	11.3471	8.5415	0	0	0	0	0	0	0	11.0984
Tetratricopeptide repeat protein 27 (TPR repeat protein 27)	TTC27	0	0	0	4.8468	0	0	0	0	7.70999	0	0	0	9.56782	0	0	0	0	0	0	0	0	0	0	0	0	7.91378	0	8.46483	0	0	0	0	0	9.0164	0	0	0	9.9724	0	0	0	7.30546	0	7.85241	0	0	0	0
Integrin alpha-IIb (GPalpha IIb) (GPIIb) (Platelet membrane glycoprotein IIb) (CD antigen CD41) [Cleaved into: Integrin alpha-IIb heavy chain; Integrin alpha-IIb light chain, form 1; Integrin alpha-IIb light chain, form 2]	ITGA2B	0	9.76631	9.60811	10.3531	12.7352	12.22	9.5502	0	0	8.8131	9.54276	9.86544	0	12.4518	0	10.8052	10.4411	8.92343	10.8873	11.1787	0	10.5179	9.23178	10.6605	0	8.94899	0	8.84493	0	9.1326	10.4464	10.8871	0	9.44801	7.22783	0	10.2775	9.43031	6.63724	10.0047	7.21919	11.5775	13.3692	10.4836	9.1933	9.15297	0	11.7775
Serine/threonine-protein kinase STK11 (EC 2.7.11.1) (Liver kinase B1) (LKB1) (hLKB1) (Renal carcinoma antigen NY-REN-19)	STK11	0	0	0	0	0	0	0	0	0	0	0	0	0	0	0	0	0	0	0	0	0	0	0	0	0	0	0	0	0	0	0	0	0	0	0	0	0	0	0	0	0	0	0	0	0	0	0	0
Epsilon-sarcoglycan (Epsilon-SG)	SGCE	0	0	7.99909	8.65914	8.64737	9.30088	8.96639	0	8.19059	8.22755	0	0	0	0	0	0	8.17744	0	9.66935	0	0	0	8.75296	8.37497	9.47407	0	9.69976	8.31358	7.80773	9.32743	8.84192	8.64566	0	0	7.17349	8.5971	8.69276	0	0	8.65391	9.75604	8.02336	8.57777	8.96547	0	0	0	0
Pleckstrin homology domain-containing family F member 1 (PH domain-containing family F member 1) (Lysosome-associated apoptosis-inducing protein containing PH and FYVE domains) (Apoptosis-inducing protein) (PH and FYVE domain-containing protein 1) (Phafin-1) (Zinc finger FYVE domain-containing protein 15)	PLEKHF1	0	0	0	0	0	0	0	0	0	0	0	0	0	0	0	0	0	0	0	0	0	0	8.92404	0	0	0	0	0	0	0	0	0	0	0	0	0	7.6783	0	0	7.7356	0	10.7685	0	0	0	0	0	0
Bis(5'-nucleosyl)-tetraphosphatase [asymmetrical] (EC 3.6.1.17) (Diadenosine 5',5'''-P1,P4-tetraphosphate asymmetrical hydrolase) (Ap4A hydrolase) (Ap4Aase) (Diadenosine tetraphosphatase) (Nucleoside diphosphate-linked moiety X motif 2) (Nudix motif 2)	NUDT2	0	9.44081	0	0	0	0	0	9.4516	9.58899	0	8.84314	0	10.1357	0	9.46104	9.26654	0	7.83166	0	0	0	0	0	7.2674	9.16643	0	0	9.45295	0	0	8.07736	6.98218	8.98869	0	0	0	0	0	0	0	0	0	8.73142	0	8.59826	9.33852	0	0
Nuclear envelope integral membrane protein 1	NEMP1	0	0	0	0	8.9617	0	0	0	0	9.73	0	0	0	0	0	0	0	0	0	0	9.09508	8.8618	0	8.6061	9.61051	10.0656	0	0	0	8.17389	0	0	0	0	0	0	0	10.1658	10.3516	0	9.70907	10.1095	0	9.32641	0	0	0	0
Pleckstrin homology domain-containing family F member 2 (PH domain-containing family F member 2) (Endoplasmic reticulum-associated apoptosis-involved protein containing PH and FYVE domains) (EAPF) (PH and FYVE domain-containing protein 2) (Phafin-2) (Phafin2) (Zinc finger FYVE domain-containing protein 18)	PLEKHF2	0	0	0	0	9.9223	0	0	0	0	0	0	10.0814	0	6.98775	0	0	0	7.44471	0	0	0	0	0	8.25533	0	0	8.69581	0	8.47312	0	0	7.74219	9.25899	0	0	8.14251	0	10.7879	0	0	0	0	8.33449	0	9.04368	0	0	12.0482
Ubiquitin carboxyl-terminal hydrolase 46 (EC 3.4.19.12) (Deubiquitinating enzyme 46) (Ubiquitin thioesterase 46) (Ubiquitin-specific-processing protease 46)	USP46	0	0	0	7.86531	6.97622	0	7.43127	0	7.34467	0	9.53662	8.29011	0	0	0	0	8.62211	0	8.05125	0	0	8.21664	7.95061	8.11623	0	8.82679	0	0	0	8.52795	0	0	0	0	9.30095	0	0	0	8.15377	0	0	7.37379	0	8.4064	0	0	0	0
Neuroligin-4, X-linked (Neuroligin X) (HNLX)	NLGN4X	0	9.02634	0	0	0	0	9.7789	0	0	0	8.51954	0	0	0	0	9.10509	11.2111	0	0	0	0	9.80526	0	0	0	0	8.64246	0	0	0	0	0	8.58774	0	0	0	0	0	0	0	0	0	8.09617	0	0	0	0	0
CD180 antigen (Lymphocyte antigen 64) (Radioprotective 105 kDa protein) (CD antigen CD180)	CD180	0	0	0	0	0	0	9.39347	0	0	9.92365	0	0	0	0	0	0	0	0	0	0	0	9.86357	0	0	0	0	8.79589	0	0	0	0	0	0	0	8.3241	0	0	0	0	6.43575	0	11.1606	0	0	0	0	0	0
Laminin subunit alpha-2 (Laminin M chain) (Laminin-12 subunit alpha) (Laminin-2 subunit alpha) (Laminin-4 subunit alpha) (Merosin heavy chain)	LAMA2	0	0	8.0666	7.17523	0	0	8.52365	0	8.09518	10.5597	7.85619	0	0	7.64898	9.71313	8.7523	8.73789	0	7.37142	0	6.39882	0	9.03814	7.957	0	0	0	9.06302	0	0	8.54844	7.99347	8.48691	10.0928	0	7.90286	9.3423	7.9881	0	6.18239	0	10.1564	0	8.59309	0	0	7.36307	0
Replication factor C subunit 2 (Activator 1 40 kDa subunit) (A1 40 kDa subunit) (Activator 1 subunit 2) (Replication factor C 40 kDa subunit) (RF-C 40 kDa subunit) (RFC40)	RFC2	0	0	0	0	0	0	0	0	0	0	8.16434	0	0	0	10.6005	0	0	0	0	0	0	0	0	0	0	0	0	0	0	0	0	0	0	0	0	0	0	0	0	0	0	10.462	0	0	8.09946	0	8.46978	0
Protein DPCD	DPCD	0	0	0	6.60885	0	0	0	0	0	0	0	9.30629	8.16252	0	0	0	0	0	7.2936	0	8.85076	8.64917	0	0	9.64311	8.3924	9.01406	0	0	0	0	0	0	8.77456	0	0	0	0	0	8.04477	10.2048	0	0	0	0	0	8.09943	10.7234
Phosphatidylinositol-glycan-specific phospholipase D (PI-G PLD) (EC 3.1.4.50) (Glycoprotein phospholipase D) (Glycosyl-phosphatidylinositol-specific phospholipase D) (GPI-PLD) (GPI-specific phospholipase D)	GPLD1	0	0	9.48881	9.6507	10.7772	11.7726	9.59215	0	0	0	0	9.84573	0	9.61982	0	0	0	0	11.1442	0	0	8.69698	10.1632	10.8997	0	0	0	0	0	8.77093	10.2185	9.85514	0	0	9.17424	0	0	8.7182	0	8.94165	0	8.18946	0	9.33986	0	0	0	0
Arginase-1 (EC 3.5.3.1) (Liver-type arginase) (Type I arginase)	ARG1	0	0	10.0688	8.45654	8.84213	8.2258	0	0	0	7.91321	0	8.91768	0	11.5255	0	0	0	0	9.31958	0	0	0	9.90067	10.0044	7.8021	7.83309	0	0	0	0	10.1782	9.83493	0	9.44647	7.66152	0	0	7.74781	8.48372	0	8.43907	8.79943	0	8.25598	0	0	0	0
Low-density lipoprotein receptor-related protein 1B (LRP-1B) (Low-density lipoprotein receptor-related protein-deleted in tumor) (LRP-DIT)	LRP1B	0	0	0	0	0	0	9.52846	0	0	0	0	8.10542	9.33619	0	0	0	0	0	0	0	0	0	0	0	0	9.23668	0	0	8.79901	8.74481	0	0	8.55896	0	0	0	0	8.90451	0	0	0	0	8.03386	10.192	7.94904	8.76723	0	10.457
Plectin (PCN) (PLTN) (Hemidesmosomal protein 1) (HD1) (Plectin-1)	PLEC	0	0	9.62265	8.73648	0	9.86873	10.6393	0	0	11.4342	0	0	0	0	0	0	0	0	0	10.1554	10.2337	10.2554	9.71755	0	10.0134	10.3928	0	0	0	8.91901	9.32099	10.2188	0	9.89125	0	0	10.6925	0	9.85882	10.9627	10.5529	10.7938	0	0	0	0	0	10.0712
Holocytochrome c-type synthase (EC 4.4.1.17) (Cytochrome c-type heme lyase)	HCCS	0	0	0	0	0	0	0	10.865	0	0	9.45148	0	0	0	12.0442	8.0422	8.71644	9.67664	0	0	0	0	0	0	0	0	0	0	0	0	0	0	10.4261	7.78369	0	9.92407	0	0	0	7.21602	0	9.79387	9.96132	0	9.78795	10.6958	8.68702	11.4342
Huntingtin-interacting protein K (Huntingtin yeast partner K)	HYPK	0	0	0	0	0	0	0	0	8.32275	0	0	0	8.55731	0	9.99035	0	9.41992	0	0	0	7.17605	0	0	0	0	0	9.44924	8.72908	9.12862	0	0	0	0	0	0	0	0	7.11895	0	6.65171	0	0	7.54025	0	0	0	7.44562	9.11602
ER degradation-enhancing alpha-mannosidase-like protein 3 (EC 3.2.1.113) (Alpha-1,2-mannosidase EDEM3)	EDEM3	0	0	0	0	0	0	0	0	0	0	0	0	0	0	0	0	0	0	0	0	0	0	0	0	0	0	0	0	0	0	0	0	0	0	0	0	0	0	0	0	0	0	0	0	0	0	0	0
DGAT1/2-independent enzyme synthesizing storage lipids (DIESL) (EC 2.3.1.-) (2-acylglycerol/1,2-diacylglycerol O-acyltransferase) (Monoacylglycerol/Diacylglycerol O-acyltransferase) (MGAT/DGAT) (EC 2.3.1.20, EC 2.3.1.22) (Transmembrane protein 68)	TMEM68	0	0	0	0	0	0	0	0	0	0	0	0	0	7.93052	0	0	0	0	0	0	0	0	9.31171	0	0	0	0	0	0	0	0	9.52028	0	9.15888	0	0	10.2238	0	0	0	0	0	0	0	0	0	0	0
Protein SCAI (Suppressor of cancer cell invasion protein)	SCAI	0	0	0	0	0	0	0	0	0	0	0	0	0	0	0	0	8.72666	6.54009	0	0	0	0	0	7.60532	0	0	0	0	0	0	7.56102	0	0	0	0	0	0	0	10.9284	0	0	0	0	0	6.88692	7.82312	0	0
Bifunctional polynucleotide phosphatase/kinase (DNA 5'-kinase/3'-phosphatase) (Polynucleotide kinase-3'-phosphatase) [Includes: Polynucleotide 3'-phosphatase (EC 3.1.3.32) (2'(3')-polynucleotidase); Polynucleotide 5'-hydroxyl-kinase (EC 2.7.1.78)]	PNKP	0	0	0	0	0	0	0	0	0	0	0	0	0	0	0	0	0	0	0	0	0	0	0	0	0	9.89855	0	0	0	0	0	0	0	0	0	0	0	0	0	7.26908	0	0	0	0	0	0	8.13146	0
Drebrin (Developmentally-regulated brain protein)	DBN1	0	0	0	0	0	0	0	0	0	0	0	0	0	0	0	0	0	0	0	0	0	0	0	7.62794	0	0	0	0	9.45828	0	0	0	0	0	0	9.29817	0	0	0	0	0	0	0	0	0	8.47318	0	0
Platelet glycoprotein 4 (Fatty acid translocase) (FAT) (Glycoprotein IIIb) (GPIIIB) (Leukocyte differentiation antigen CD36) (PAS IV) (PAS-4) (Platelet collagen receptor) (Platelet glycoprotein IV) (GPIV) (Thrombospondin receptor) (CD antigen CD36)	CD36	0	10.7549	7.94692	8.90936	10.3624	9.02559	10.1281	10.0941	9.38173	0	10.8694	8.64991	7.62467	10.533	10.0495	11.1664	10.8661	9.75103	8.51691	0	0	9.04573	10.7851	8.88167	0	0	9.11919	10.689	9.17204	9.5321	8.33936	10.5986	9.15476	0	7.48188	9.48301	8.32611	9.15005	0	8.43837	0	9.53134	9.95649	8.68931	11.1918	10.4341	10.0193	9.52565
Formin-binding protein 4 (Formin-binding protein 30)	FNBP4	0	0	0	0	0	0	0	0	0	0	0	0	0	0	0	0	0	0	0	0	0	0	0	0	0	7.40275	0	0	0	7.63943	0	0	0	0	7.15826	0	0	0	0	0	0	7.46721	0	7.40367	0	0	0	0
Suppressor of SWI4 1 homolog (Ssf-1) (Brix domain-containing protein 3) (Peter Pan homolog)	PPAN	0	0	0	0	0	0	0	0	0	0	0	0	0	0	12.3308	0	0	0	0	0	9.3287	0	0	0	0	0	0	0	0	0	0	0	0	0	0	8.94626	0	0	0	0	0	0	0	0	0	0	0	11.7295
Synembryn-B (Brain synembryn) (hSyn) (Protein Ric-8B)	RIC8B	0	0	8.35854	7.95107	0	0	0	0	0	0	0	10.4219	0	0	0	0	8.49508	0	0	8.33721	0	0	9.18805	9.38338	0	0	9.20592	0	8.43425	8.53355	0	9.7553	0	9.75584	0	0	9.73471	11.0904	0	0	0	0	0	0	0	7.76175	0	0
CCN family member 3 (Cellular communication network factor 3) (Insulin-like growth factor-binding protein 9) (IBP-9) (IGF-binding protein 9) (IGFBP-9) (Nephro blastoma-overexpressed gene protein homolog) (Protein NOV homolog) (NovH)	CCN3	10.8869	8.80463	0	8.84383	8.18362	0	0	0	8.80216	9.74454	9.04516	0	9.01245	0	0	0	0	0	8.55896	7.51504	0	0	0	7.39051	0	8.79262	7.43061	0	8.11764	8.41375	7.97716	0	8.42771	8.56005	8.33615	8.59253	0	9.1826	0	10.0366	8.62351	0	8.27712	0	0	7.27878	8.81305	0
Carbonic anhydrase 14 (EC 4.2.1.1) (Carbonate dehydratase XIV) (Carbonic anhydrase XIV) (CA-XIV)	CA14	7.89226	10.8464	0	0	0	0	0	0	0	0	0	0	0	0	0	0	0	0	0	0	0	0	0	0	0	0	0	0	0	0	0	0	0	0	0	0	0	9.59848	0	7.89006	0	0	0	0	0	0	8.06488	9.42115
ATP-dependent translocase ABCB1 (ATP-binding cassette sub-family B member 1) (Multidrug resistance protein 1) (EC 7.6.2.2) (P-glycoprotein 1) (Phospholipid transporter ABCB1) (EC 7.6.2.1) (CD antigen CD243)	ABCB1	8.73217	9.68251	0	0	9.30103	0	0	8.92679	9.47607	9.06086	10.0624	7.63777	0	0	0	0	8.3226	8.85078	7.04112	0	6.69741	7.58868	0	7.8101	8.26755	8.31537	0	8.47086	11.1227	8.08697	0	0	10.2393	7.33749	8.51758	7.11434	8.12404	7.71304	10.5317	9.20962	0	8.90733	10.6308	6.51612	8.75209	9.22249	8.47959	9.38357
Guided entry of tail-anchored proteins factor CAMLG (Calcium signal-modulating cyclophilin ligand)	CAMLG	8.80331	10.1987	0	0	0	0	0	10.5497	9.95874	0	8.33887	0	9.42073	0	10.3072	8.35157	9.33173	7.90989	0	0	7.82849	0	0	0	0	0	8.27215	9.73133	0	0	0	0	8.69375	7.15885	0	8.29831	0	0	0	0	0	0	8.69127	0	8.61802	9.28312	7.34808	0
Monocarboxylate transporter 8 (MCT 8) (Monocarboxylate transporter 7) (MCT 7) (Solute carrier family 16 member 2) (X-linked PEST-containing transporter)	SLC16A2	0	0	0	0	9.26294	7.85113	9.06017	0	0	8.35957	0	8.90232	0	0	0	0	0	0	0	0	8.34517	0	7.04469	7.80372	9.49451	0	0	0	8.72453	0	7.4156	7.71178	0	0	0	0	0	9.66349	9.1339	7.7461	8.3244	9.08478	0	8.51062	0	0	0	9.83353
Protein VCF1 (VCP nuclear cofactor family member 1)	VCF1	0	0	0	0	0	0	0	0	0	0	0	0	0	0	0	0	0	0	0	0	0	0	0	0	0	0	0	0	0	0	0	0	0	0	0	0	0	0	0	0	0	0	0	0	0	0	0	0
Dehydrogenase/reductase SDR family member 2, mitochondrial (EC 1.1.1.-) (Dicarbonyl reductase HEP27) (Protein D) (Short chain dehydrogenase/reductase family 25C member 1) (Protein SDR25C1)	DHRS2	0	0	0	0	0	0	0	0	8.59159	0	9.05235	8.23956	0	0	0	0	0	0	0	0	0	0	0	0	0	0	0	0	0	0	0	0	0	0	0	0	0	0	0	0	0	0	0	0	0	0	0	10.1981
Sphingomyelin phosphodiesterase (EC 3.1.4.12) (EC 3.1.4.3) (Acid sphingomyelinase) (aSMase) [Cleaved into: Sphingomyelin phosphodiesterase, processed form]	SMPD1	0	0	0	6.50651	0	0	0	0	0	0	0	0	0	0	0	0	0	0	0	7.81768	0	0	0	0	0	0	0	0	0	7.90592	0	0	0	0	0	0	0	0	0	8.55068	9.54802	10.6156	0	9.02153	0	0	0	0
Immunoglobulin kappa variable 3D-11	IGKV3D-11	0	0	0	10.1584	11.1119	12.443	9.73452	0	0	8.79439	0	12.7027	0	10.9277	9.63874	10.2014	9.48509	7.57153	10.7774	0	11.5584	0	9.82372	12.3223	11.3107	0	9.58303	0	9.98379	0	10.2993	8.71461	0	10.3921	0	8.73385	11.5373	0	0	9.68147	9.69622	11.2831	8.69592	11.0655	9.13097	0	0	9.13848
Myosin light chain kinase, smooth muscle (MLCK) (smMLCK) (EC 2.7.11.18) (Kinase-related protein) (KRP) (Telokin) [Cleaved into: Myosin light chain kinase, smooth muscle, deglutamylated form]	MYLK	0	0	0	0	8.71421	5.97658	8.29377	0	10.2116	0	0	0	10.7898	0	0	0	0	0	7.4592	0	6.12643	0	10.7377	0	0	0	0	10.3552	0	6.55576	0	8.82333	0	7.64005	0	0	0	8.01621	0	0	0	0	0	8.17281	0	0	9.16376	10.89
Methylenetetrahydrofolate reductase (NADPH) (EC 1.5.1.53)	MTHFR	0	0	0	0	9.16975	0	0	0	0	0	0	7.86283	0	0	0	0	0	0	8.2098	7.23237	0	0	0	10.8424	0	8.85395	0	0	10.2078	6.55172	0	0	0	0	6.53338	0	0	9.2088	0	9.885	0	9.49689	0	8.65635	0	9.41541	0	0
DNA polymerase delta catalytic subunit (EC 2.7.7.7) (3'-5' exodeoxyribonuclease) (EC 3.1.11.-) (DNA polymerase subunit delta p125)	POLD1	0	0	0	0	0	0	0	0	0	0	0	0	0	0	0	0	0	0	0	0	0	0	0	0	0	0	0	0	0	0	0	0	0	0	8.74336	9.10977	0	0	0	0	0	10.5007	0	0	0	0	0	0
Caspase-7 (CASP-7) (EC 3.4.22.60) (Apoptotic protease Mch-3) (CMH-1) (ICE-like apoptotic protease 3) (ICE-LAP3) [Cleaved into: Caspase-7 subunit p20; Caspase-7 subunit p11]	CASP7	0	0	0	6.83311	0	0	0	0	0	0	0	0	0	0	0	0	0	0	0	0	0	0	0	0	0	0	0	0	0	8.14579	0	0	9.74539	0	7.78959	0	0	8.90253	8.42758	0	0	0	0	0	0	8.86944	0	9.86403
Monoacylglycerol lipase ABHD6 (EC 3.1.1.23) (2-arachidonoylglycerol hydrolase) (Abhydrolase domain-containing protein 6)	ABHD6	10.4606	0	0	0	0	0	0	0	0	0	0	0	0	0	0	0	0	0	0	0	0	0	0	0	0	0	0	0	0	0	0	0	0	0	8.27293	0	9.31817	0	0	0	0	0	9.8463	0	9.83476	0	0	0
Gamma-tubulin complex component 4 (GCP-4) (hGCP4) (Gamma-ring complex protein 76 kDa) (h76p) (hGrip76)	TUBGCP4	0	0	0	0	0	0	0	0	0	0	0	0	0	0	0	0	0	0	0	0	0	0	0	0	0	8.26829	0	0	0	0	0	0	0	0	0	0	0	0	0	0	0	0	0	0	0	0	0	0
Reticulon-4-interacting protein 1, mitochondrial (NOGO-interacting mitochondrial protein)	RTN4IP1	0	0	0	0	0	0	0	0	0	0	0	0	0	0	0	0	9.2052	0	0	0	0	0	0	0	0	0	8.87373	0	0	0	0	0	0	0	0	0	0	0	0	0	0	0	8.95464	0	9.30422	0	0	0
Clathrin light chain A (Lca)	CLTA	0	0	0	0	0	8.10567	9.92109	9.98914	0	0	0	0	10.1844	0	9.95335	10.7841	11.6945	10.6557	0	0	9.71923	0	7.11216	8.46599	0	10.214	0	9.6268	9.96779	9.69747	0	8.03711	9.26026	0	10.2246	10.6481	0	9.48663	9.52941	9.18552	9.285	0	10.6797	0	10.1465	9.77532	10.4882	0
Zinc finger protein ubi-d4 (Apoptosis response zinc finger protein) (BRG1-associated factor 45D) (BAF45D) (D4, zinc and double PHD fingers family 2) (Protein requiem)	DPF2	0	0	0	0	0	0	0	0	0	10.0047	0	0	0	0	0	0	0	0	0	8.17876	8.85832	0	0	0	10.0679	0	7.24193	0	8.29625	0	0	0	9.18146	0	0	8.66976	0	0	0	0	10.3391	9.75906	9.56885	0	0	0	7.82508	0
Arf-GAP with SH3 domain, ANK repeat and PH domain-containing protein 1 (130 kDa phosphatidylinositol 4,5-bisphosphate-dependent ARF1 GTPase-activating protein) (ADP-ribosylation factor-directed GTPase-activating protein 1) (ARF GTPase-activating protein 1) (Development and differentiation-enhancing factor 1) (DEF-1) (Differentiation-enhancing factor 1) (PIP2-dependent ARF1 GAP)	ASAP1	0	0	0	0	9.23708	7.82459	0	0	0	0	0	8.4064	0	0	0	7.39152	0	0	0	7.9256	0	0	0	0	0	0	0	0	0	0	0	8.34744	8.23466	7.98141	0	0	0	0	0	7.19602	0	9.50308	7.85218	9.97177	8.62867	9.29858	7.72853	0
Protein-glutamine gamma-glutamyltransferase K (EC 2.3.2.13) (Epidermal TGase) (Transglutaminase K) (TG(K)) (TGK) (TGase K) (Transglutaminase-1) (TGase-1)	TGM1	8.43819	0	0	0	8.90249	0	0	0	0	8.24912	0	7.11168	0	0	0	0	0	9.48926	0	0	0	0	8.72627	0	7.37004	8.11967	0	0	0	0	0	0	0	0	6.78059	8.72236	0	9.19909	9.70453	0	9.08484	8.31241	0	0	0	8.62872	0	9.53265
NADH-cytochrome b5 reductase 2 (b5R.2) (EC 1.6.2.2)	CYB5R2	0	0	0	0	0	0	0	0	0	0	0	0	0	0	0	0	0	0	7.02494	0	0	0	0	0	9.65588	9.00225	9.3565	0	0	0	8.50528	8.14214	0	0	7.34555	0	0	0	0	0	9.48623	0	0	0	0	0	0	0
Gamma-synuclein (Breast cancer-specific gene 1 protein) (Persyn) (Synoretin) (SR)	SNCG	0	0	0	8.20207	0	0	8.05734	0	0	0	0	0	0	7.96432	8.99617	9.25377	11.8352	7.12879	0	0	0	0	8.83578	8.64626	0	0	0	8.41413	0	0	9.80245	8.53824	7.63498	0	0	0	0	8.60723	8.86195	9.78014	8.18588	7.92615	0	10.3167	0	0	7.78513	0
GTP cyclohydrolase 1 feedback regulatory protein (GFRP) (GTP cyclohydrolase I feedback regulatory protein) (p35)	GCHFR	0	0	0	0	0	0	0	0	0	0	0	0	0	7.7966	8.69424	0	0	7.52715	6.85537	0	0	0	8.30242	7.51304	0	0	0	0	0	0	6.92958	0	0	0	0	0	0	0	8.86036	0	10.5069	0	5.91928	0	8.72003	8.57414	0	8.95862
Solute carrier family 26 member 6 (Anion exchange transporter) (Pendrin-like protein 1) (Pendrin-L1)	SLC26A6	0	0	0	0	0	0	0	0	0	9.7803	0	0	0	0	0	0	0	0	0	0	0	0	0	0	0	0	0	0	0	0	0	0	0	0	0	0	0	0	0	0	0	0	0	0	9.30709	8.65263	0	12.0887
Reactive oxygen species modulator 1 (ROS modulator 1) (Epididymis tissue protein Li 175) (Glyrichin) (Mitochondrial targeting GxxxG motif protein) (MTGM) (Protein MGR2 homolog)	ROMO1	9.15133	0	0	0	0	0	0	11.2763	0	0	0	0	0	0	11.0218	9.42382	8.87489	7.62894	0	0	0	9.57012	0	0	8.8963	0	0	0	0	0	0	0	0	0	0	8.84624	0	0	0	8.69741	0	0	0	0	9.44082	7.03642	0	0
Nucleolar protein 8 (Nucleolar protein Nop132)	NOL8	0	0	0	0	0	0	0	10.6079	0	10.4481	8.34801	0	0	0	0	0	0	0	0	0	7.94936	0	0	0	0	0	0	0	7.71591	0	0	0	0	0	6.99385	0	0	0	0	0	0	0	9.11854	0	0	0	0	0
Solute carrier family 2, facilitated glucose transporter member 5 (Fructose transporter) (Glucose transporter type 5, small intestine) (GLUT-5)	SLC2A5	0	0	0	6.38831	0	0	0	0	0	8.60283	0	0	7.96835	0	0	0	0	0	0	0	7.8446	8.44367	0	0	9.00815	0	0	0	0	5.94526	0	0	0	0	7.25925	0	0	7.58673	8.43442	0	0	9.17199	0	0	0	0	0	0
EMILIN-3 (EMILIN-5) (Elastin microfibril interface-located protein 3) (Elastin microfibril interfacer 3) (Elastin microfibril interface-located protein 5) (Elastin microfibril interfacer 5)	EMILIN3	0	0	0	7.24606	0	7.93121	9.18813	0	0	0	0	0	0	0	0	0	0	0	7.35969	0	0	9.41846	0	7.80853	0	0	0	0	9.58132	7.8754	8.10541	7.71801	0	7.24302	0	0	0	0	0	7.47753	0	8.49399	9.66182	9.2755	0	0	0	0
DNA dC->dU-editing enzyme APOBEC-3F (EC 3.5.4.38) (Apolipoprotein B mRNA-editing enzyme catalytic polypeptide-like 3F) (A3F)	APOBEC3F	0	0	0	0	0	0	0	0	0	0	0	0	0	0	0	0	0	0	0	0	0	0	0	0	0	0	0	0	0	0	0	0	0	0	0	0	0	0	0	0	0	0	0	0	0	0	0	0
Protein CUSTOS	CUSTOS	0	0	0	0	0	0	0	0	0	0	0	8.15487	0	0	10.812	0	7.48096	0	0	6.72002	0	11.6753	0	0	0	0	0	0	0	0	0	0	0	0	0	0	0	0	0	8.94414	0	0	0	0	0	0	0	0
Regulator of G-protein signaling 10 (RGS10)	RGS10	0	8.46669	0	0	0	0	0	8.85961	0	0	0	0	8.92909	0	9.10882	7.34593	0	7.64019	6.15946	0	7.98701	0	0	0	0	0	9.97581	9.20162	0	0	0	0	7.30781	0	9.92578	0	0	0	0	0	0	0	0	0	7.95084	0	7.63797	0
Ubiquinone biosynthesis O-methyltransferase, mitochondrial (3-demethylubiquinol 3-O-methyltransferase) (EC 2.1.1.64) (Polyprenyldihydroxybenzoate methyltransferase) (EC 2.1.1.114)	COQ3	0	0	0	0	0	0	0	0	0	0	0	0	0	0	0	0	8.9099	0	0	0	0	0	8.41568	8.21641	0	0	0	0	0	0	0	0	8.4486	10.9962	0	9.24801	0	0	9.91612	0	0	0	8.48838	0	0	8.03275	9.32333	0
Acetoacetyl-CoA synthetase (EC 6.2.1.16) (Acyl-CoA synthetase family member 1) (Protein sur-5 homolog)	AACS	0	0	0	0	0	0	0	0	0	0	0	0	0	0	0	0	8.08996	0	0	0	0	9.1512	0	0	0	0	0	0	0	0	0	0	0	0	0	0	0	0	0	0	0	9.41618	0	0	0	0	0	0
Nuclear cap-binding protein subunit 3 (Protein ELG)	NCBP3	0	0	0	0	0	0	0	0	0	0	0	0	0	0	0	0	0	0	0	0	10.7689	8.66283	0	0	9.74418	9.51815	0	0	0	8.93172	0	0	0	0	9.34286	0	0	8.72395	9.64271	0	8.92581	10.1166	0	0	0	0	0	9.17977
Protein WWC3	WWC3	0	0	0	0	0	0	0	0	0	0	0	0	0	0	0	0	0	0	0	0	0	0	0	0	0	0	0	0	0	0	0	0	0	0	0	0	0	0	0	0	0	0	0	0	0	0	0	0
V-set and transmembrane domain-containing protein 4 [Cleaved into: Peptide Lv]	VSTM4	0	0	0	0	0	0	0	0	0	0	0	0	0	0	0	0	0	0	0	0	0	0	0	6.95989	0	0	8.54605	0	8.8566	0	0	0	9.46751	0	0	0	0	0	0	0	0	0	8.6742	0	0	7.63469	0	10.6554
Lysine-specific demethylase 9 (KDM9) (EC 1.14.11.-) (Round spermatid basic protein 1)	RSBN1	0	0	0	0	0	0	0	0	0	0	0	0	0	0	0	0	0	0	0	0	9.49573	11.9684	0	0	0	0	0	0	0	0	0	0	0	0	0	0	0	0	0	0	0	0	0	0	0	0	0	0
Leiomodin-1 (64 kDa autoantigen 1D) (64 kDa autoantigen 1D3) (64 kDa autoantigen D1) (Leiomodin, muscle form) (Smooth muscle leiomodin) (SM-Lmod) (Thyroid-associated ophthalmopathy autoantigen)	LMOD1	9.71566	10.0831	10.3789	0	9.1189	8.45316	9.75714	0	10.8005	10.5709	0	0	10.2971	9.37819	8.95108	9.69927	0	0	8.78918	0	10.4442	0	10.0679	0	0	0	10.4	10.4293	11.0887	9.68048	11.4815	9.80116	9.71852	0	8.22717	0	9.09922	10.4142	9.79683	8.65016	9.277	10.5979	10.2716	10.5045	0	0	9.93814	0
Complement C1q tumor necrosis factor-related protein 5	C1QTNF5	0	0	10.3216	10.9162	9.92469	12.2648	11.9183	0	0	13.1223	0	8.11686	0	10.7497	9.26526	0	0	0	12.0919	7.82188	0	11.0539	12.2027	11.523	8.45229	9.70096	0	0	9.66669	10.7907	11.357	11.1893	0	0	12.7377	0	10.0574	9.39608	10.4198	10.9391	0	11.6037	8.40758	9.02928	0	0	0	8.94536
Splicing factor 3B subunit 5 (SF3b5) (Pre-mRNA-splicing factor SF3b 10 kDa subunit)	SF3B5	8.38997	9.82707	0	0	0	0	0	9.82572	10.0716	0	8.69323	0	9.77924	0	10.5293	9.05926	0	9.55272	0	0	0	0	0	0	0	0	9.02317	0	0	0	0	0	8.79682	0	0	9.24903	0	0	0	6.09434	8.3186	0	8.18378	0	9.10625	10.4268	8.62588	0
NF-kappa-B inhibitor-interacting Ras-like protein 2 (I-kappa-B-interacting Ras-like protein 2) (Kappa B-Ras protein 2) (KappaB-Ras2)	NKIRAS2	0	0	0	7.52544	0	0	0	0	0	0	0	8.81342	0	0	10.534	0	0	9.52126	0	0	10.5997	0	0	9.29192	0	0	0	10.4823	0	0	0	0	9.78187	0	0	0	0	0	0	8.24087	10.6194	10.4601	0	9.84664	0	0	10.0305	0
N-acetylgalactosamine kinase (EC 2.7.1.157) (GalNAc kinase) (Galactokinase 2)	GALK2	0	0	8.73868	0	0	0	0	0	0	0	0	8.17447	0	9.90913	0	0	0	0	0	0	0	0	8.67743	0	0	0	0	0	0	0	0	0	0	0	0	8.49347	0	0	0	0	9.64213	0	0	0	0	0	9.18784	9.29875
E3 ubiquitin-protein ligase NEDD4-like (EC 2.3.2.26) (EC 2.3.2.36) (HECT-type E3 ubiquitin transferase NED4L) (NEDD4.2) (Nedd4-2)	NEDD4L	0	0	0	0	0	0	0	0	0	0	0	0	0	7.07379	0	0	9.27988	0	0	0	0	0	0	8.60054	0	0	7.68129	0	0	0	0	0	0	0	0	0	6.91178	0	0	9.20121	0	0	0	0	0	0	0	0
DNA repair endonuclease XPF (EC 3.1.-.-) (DNA excision repair protein ERCC-4) (DNA repair protein complementing XP-F cells) (Xeroderma pigmentosum group F-complementing protein)	ERCC4	0	0	0	0	0	0	0	0	0	0	0	0	0	0	0	8.85449	0	0	0	0	0	0	0	0	0	0	0	0	0	0	0	0	0	0	7.72107	0	0	0	0	0	0	0	0	0	0	0	0	12.0434
Probable E3 ubiquitin-protein ligase IRF2BPL (EC 2.3.2.27) (Enhanced at puberty protein 1) (Interferon regulatory factor 2-binding protein-like)	IRF2BPL	0	0	0	0	0	0	0	0	8.35984	8.75229	0	0	0	0	9.85475	0	0	8.76255	0	0	0	9.57964	0	0	0	0	0	0	0	0	0	0	0	0	0	0	0	9.20639	8.16136	6.6991	0	0	0	0	9.04957	0	0	0
Ribosome biogenesis protein NOP53 (Glioma tumor suppressor candidate region gene 2 protein) (Protein interacting with carboxyl terminus 1) (PICT-1) (p60)	NOP53	0	0	0	0	0	0	0	0	7.98709	0	9.0837	0	0	0	8.74319	0	0	0	0	0	9.40557	0	0	0	0	0	7.87454	8.76399	0	0	0	0	0	0	0	8.85474	0	0	0	0	0	0	8.01717	0	8.02427	0	8.96662	9.13435
Myocyte-specific enhancer factor 2A (Serum response factor-like protein 1)	MEF2A	0	0	0	0	0	0	0	0	0	0	0	8.7869	0	0	0	0	0	0	0	0	8.10129	0	0	0	8.953	0	0	0	0	0	0	0	0	0	0	0	0	0	0	8.01604	0	0	0	0	0	0	0	0
ER membrane protein complex subunit 10 (Hematopoietic signal peptide-containing membrane domain-containing protein 1)	EMC10	0	0	0	0	0	0	0	0	0	0	0	0	0	0	0	0	0	0	0	0	0	0	0	0	0	0	0	0	0	0	0	0	0	0	0	0	0	0	0	0	0	0	0	0	0	0	0	0
Cytoplasmic phosphatidylinositol transfer protein 1 (Mammalian rdgB homolog beta) (M-rdgB beta) (MrdgBbeta) (Retinal degeneration B homolog beta) (RdgBbeta)	PITPNC1	0	0	0	0	0	0	0	11.1391	0	0	11.0285	0	0	0	0	10.7824	0	10.6896	0	8.29257	0	8.75648	0	8.10786	0	10.5835	0	0	0	7.93794	8.2198	0	10.7223	0	8.14703	9.10043	0	0	0	0	0	0	0	8.9591	10.5285	8.89389	0	10.3826
ADAMTS-like protein 1 (ADAMTSL-1) (Punctin-1)	ADAMTSL1	9.49562	0	0	0	0	0	10.1215	0	0	11.804	8.73317	0	0	0	0	8.74906	0	7.89148	8.397	0	0	0	0	0	0	0	0	0	8.90802	8.50435	6.79356	7.83924	8.18155	0	0	0	8.43052	0	0	7.84532	0	8.47611	8.60542	9.33028	7.68474	9.41988	8.17063	0
Ectonucleoside triphosphate diphosphohydrolase 2 (NTPDase 2) (EC 3.6.1.-) (CD39 antigen-like 1) (Ecto-ATP diphosphohydrolase 2) (Ecto-ATPDase 2) (Ecto-ATPase 2)	ENTPD2	0	9.02014	0	0	0	0	0	0	0	0	0	7.46818	0	0	0	0	9.25087	0	0	0	0	0	0	0	8.67987	8.23293	0	0	0	0	7.66124	0	0	0	6.76677	0	0	0	0	0	0	0	7.82691	0	0	0	6.83157	9.31422
Dynamin-1 (EC 3.6.5.5) (Dynamin) (Dynamin I)	DNM1	8.41433	9.81332	0	8.16241	8.08131	0	0	0	8.87014	0	8.17344	0	11.304	0	8.38899	8.25662	12.5832	8.28853	8.02505	0	0	8.54715	7.94663	7.81834	0	0	9.48667	10.3793	8.8857	0	6.60244	7.61815	6.78206	7.97429	0	7.29843	7.44968	0	7.76932	0	0	0	7.56445	0	8.4749	8.4245	0	7.72097
MARVEL domain-containing protein 1	MARVELD1	0	0	0	0	0	0	0	0	9.10528	0	8.05527	0	0	0	0	7.04352	0	0	0	0	0	0	0	0	0	0	0	0	0	7.10448	8.18643	0	0	0	0	0	7.05714	0	0	0	0	0	0	0	0	7.47907	0	0
Small ribosomal subunit protein uS2m (28S ribosomal protein S2, mitochondrial) (MRP-S2) (S2mt)	MRPS2	0	0	0	0	0	0	0	0	0	0	0	0	0	0	0	0	0	0	7.57338	0	9.75742	0	0	0	0	10.6004	0	0	0	0	0	0	0	8.57778	8.58753	8.64636	0	0	0	0	0	0	8.46246	0	0	0	0	0
Neurofilament light polypeptide (NF-L) (68 kDa neurofilament protein) (Neurofilament triplet L protein)	NEFL	7.64228	0	0	7.87666	7.27061	5.12681	0	0	8.90736	8.92543	9.75477	0	0	9.49171	0	8.4504	12.5597	0	6.79673	0	8.00882	8.41373	0	7.64252	0	0	8.62132	10.8716	7.55766	0	7.44452	7.47149	8.76909	8.04022	0	8.64712	0	0	9.06358	0	0	10.3232	8.60016	0	0	0	9.20231	8.5234
Large ribosomal subunit protein uL30m (39S ribosomal protein L28, mitochondrial) (L28mt) (MRP-L28) (39S ribosomal protein L30, mitochondrial) (L30mt) (MRP-L30)	MRPL30	7.46409	0	0	0	0	0	0	13.8839	0	0	0	0	0	0	13.8509	7.49782	8.17952	9.03971	0	0	6.2004	0	0	0	0	0	8.22399	0	8.93573	0	0	0	0	0	0	9.28252	6.51234	10.3926	0	0	0	0	0	0	9.54595	9.736	8.22233	0
Death domain-associated protein 6 (Daxx) (hDaxx) (ETS1-associated protein 1) (EAP1) (Fas death domain-associated protein)	DAXX	0	0	0	0	0	0	0	0	0	0	0	0	0	0	0	0	0	0	0	0	0	0	0	0	0	0	0	0	0	0	0	0	0	0	0	0	7.78237	10.6781	0	0	0	0	0	0	0	0	0	10.5376
Ferroptosis suppressor protein 1 (FSP1) (EC 1.6.5.-) (Apoptosis-inducing factor homologous mitochondrion-associated inducer of death) (AMID) (p53-responsive gene 3 protein)	AIFM2	0	0	0	0	0	0	0	0	0	0	0	0	0	0	0	0	0	0	0	0	0	0	0	0	9.73621	10.604	0	0	0	0	0	0	0	10.7082	0	0	0	0	9.84306	0	9.72976	9.65336	0	0	0	0	0	0
Sp110 nuclear body protein (Interferon-induced protein 41/75) (Speckled 110 kDa) (Transcriptional coactivator Sp110)	SP110	0	0	0	0	0	0	0	0	0	0	0	0	0	7.84691	0	0	0	0	0	0	0	0	0	0	0	0	0	0	0	0	0	7.06751	7.9305	0	0	0	0	0	0	0	0	11.6188	7.88389	0	0	0	0	0
Vacuolar protein sorting-associated protein 28 homolog (H-Vps28) (ESCRT-I complex subunit VPS28)	VPS28	0	10.4086	0	0	0	0	0	9.92677	10.8583	0	0	0	10.3363	0	9.99766	0	0	10.197	0	0	0	0	0	0	0	0	8.30048	9.43583	0	0	0	0	9.096	9.15795	0	7.36853	0	0	0	7.62271	0	0	8.09469	0	9.0769	9.67425	7.68807	0
Plastin-1 (Intestine-specific plastin) (I-plastin)	PLS1	0	0	0	0	0	0	8.46658	9.52192	0	0	0	0	10.0443	6.30733	0	0	0	9.01821	0	0	0	0	0	8.41813	8.70443	0	9.28625	0	7.00124	0	0	9.44742	8.46351	0	0	0	0	0	7.78259	8.70537	11.6924	0	0	9.59291	0	8.17613	8.44281	0
Histone deacetylase 4 (HD4) (EC 3.5.1.98)	HDAC4	0	0	0	0	0	0	0	0	0	0	0	0	0	0	0	0	0	0	0	0	0	0	0	0	0	0	0	0	0	0	0	0	0	0	0	0	0	0	0	0	0	0	0	0	0	0	0	0
Isopentenyl-diphosphate Delta-isomerase 1 (EC 5.3.3.2) (Isopentenyl pyrophosphate isomerase 1) (IPP isomerase 1) (IPPI1)	IDI1	9.74532	0	0	0	0	0	0	0	0	0	8.5766	0	0	0	0	0	8.79308	0	0	0	9.51383	0	0	0	0	8.12372	0	8.04628	0	0	0	0	7.96527	8.05729	7.21706	7.68303	0	0	8.46215	8.70155	0	0	0	0	0	8.34668	8.04872	0
Protein canopy homolog 4	CNPY4	0	9.13515	0	0	0	0	0	8.76845	8.70266	0	0	0	9.0051	0	9.08848	10.0031	0	9.81165	0	0	0	0	0	0	7.46955	0	0	8.38006	13.7308	8.91623	0	0	8.8028	0	0	8.53153	0	0	7.6727	0	7.77237	0	0	0	9.86203	0	8.63205	7.22803
Ankyrin repeat and BTB/POZ domain-containing protein 3 (BTB/POZ domain-containing protein 11)	ABTB3	0	0	0	0	0	0	0	0	0	0	0	0	0	0	0	0	0	0	0	0	0	0	0	0	0	0	0	0	0	0	0	0	0	0	0	0	0	0	0	0	0	0	0	0	0	0	0	0
Transcriptional coactivator YAP1 (Yes-associated protein 1) (Protein yorkie homolog) (Yes-associated protein YAP65 homolog)	YAP1	0	8.37123	0	0	0	0	0	0	0	0	0	0	10.1107	0	8.0043	8.47305	0	8.12302	0	0	8.47792	0	0	0	0	0	8.38252	0	10.5139	7.02379	7.88311	0	0	0	0	8.31943	0	0	0	8.53531	0	0	7.85499	0	8.3797	9.50606	7.60476	9.15359
Tissue-type plasminogen activator (t-PA) (t-plasminogen activator) (tPA) (EC 3.4.21.68) (Alteplase) (Reteplase) [Cleaved into: Tissue-type plasminogen activator chain A; Tissue-type plasminogen activator chain B]	PLAT	0	0	8.55127	0	0	8.02808	10.4206	9.21147	8.0828	0	0	0	0	0	0	0	0	9.55812	10.8554	0	0	0	9.69665	8.48535	0	0	0	0	7.83669	9.49805	7.97669	8.24719	0	0	0	0	8.09979	9.88678	0	8.47348	0	10.2911	0	10.3839	6.68278	7.88969	7.33677	0
ATPase inhibitor, mitochondrial (ATP synthase F1 subunit epsilon) (Inhibitor of F(1)F(o)-ATPase) (IF(1)) (IF1)	ATP5IF1	11.6857	11.3562	5.36746	0	0	0	9.01186	10.3382	10.5974	0	11.4295	0	10.7662	4.02812	11.4388	10.6181	12.3689	10.9098	0	0	8.82503	8.13009	0	6.54244	0	0	9.283	11.3337	10.2446	0	6.14806	0	10.0462	0	9.43131	9.44953	5.33689	9.82045	9.93373	9.87992	0	11.1187	10.8295	0	11.2216	10.9183	9.8754	9.8967
E3 ubiquitin-protein ligase RNF31 (EC 2.3.2.31) (HOIL-1-interacting protein) (HOIP) (RING finger protein 31) (RING-type E3 ubiquitin transferase RNF31) (Zinc in-between-RING-finger ubiquitin-associated domain protein)	RNF31	0	0	0	0	0	0	0	0	0	0	6.54943	0	9.15645	0	0	0	0	0	0	0	0	0	0	0	0	0	0	7.72105	0	0	0	0	0	0	0	0	0	0	0	0	0	0	7.82459	0	0	0	0	0
Actin, cytoplasmic 2 (EC 3.6.4.-) (Gamma-actin) [Cleaved into: Actin, cytoplasmic 2, N-terminally processed]	ACTG1	11.3121	14.9036	0	0	14.7101	13.0367	15.3575	14.2111	14.598	14.5945	15.2973	14.8224	15.0141	0	0	14.4848	15.3926	13.9845	12.9612	0	0	13.915	14.8675	14.773	0	14.9643	14.757	16.0372	0	14.047	0	14.0921	0	12.8156	13.7107	14.8669	15.3682	16.3887	0	15.5302	15.1524	0	15.7769	14.9862	15.1402	14.1004	15.1666	0
Glial fibrillary acidic protein (GFAP)	GFAP	8.40255	0	6.79836	10.8865	7.3202	7.46482	0	7.02663	0	5.88455	6.94833	0	8.03535	0	7.21962	10.8777	12.0559	9.21571	9.36069	0	0	9.67781	7.98481	9.18303	0	0	0	12.0593	0	7.39127	6.91126	7.27301	8.20712	0	0	7.79819	8.08509	7.91956	12.5047	0	5.14648	5.77591	7.27767	5.16148	0	0	7.04046	8.56167
Vacuolar protein sorting-associated protein 8 homolog	VPS8	0	0	0	0	0	0	0	0	10.0637	0	0	0	10.1079	0	0	9.4106	8.94668	0	0	0	0	9.02597	8.13866	0	0	0	0	0	0	0	0	7.76952	0	0	0	9.81657	0	9.57059	0	0	0	9.91992	10.0259	0	9.36291	10.4412	0	9.2699
Transmembrane protein 70, mitochondrial	TMEM70	0	0	0	7.11094	0	0	0	0	0	0	0	0	0	9.31478	0	0	9.29822	0	0	6.79225	9.25908	9.37828	0	0	8.4627	8.17486	0	0	0	8.25277	0	0	0	9.9671	8.02885	0	0	8.13533	9.35587	0	7.80771	9.51545	0	7.87281	9.57966	9.15897	0	0
Matrix-remodeling-associated protein 5 (Adhesion protein with leucine-rich repeats and immunoglobulin domains related to perlecan) (Adlican)	MXRA5	0	0	8.62231	9.87753	0	8.08408	9.01597	0	0	9.3024	6.61064	0	0	0	12.2791	5.87841	0	0	7.59262	0	0	0	0	9.15476	0	8.40896	8.84265	0	8.27561	8.15634	8.98475	8.979	0	9.02853	0	0	8.33031	8.5236	0	6.95697	0	8.2646	0	8.34246	0	0	0	0
Protein Smaug homolog 1 (Smaug 1) (hSmaug1) (Sterile alpha motif domain-containing protein 4A) (SAM domain-containing protein 4A)	SAMD4A	0	0	0	0	0	0	0	0	10.5084	0	8.47552	0	0	0	0	0	0	7.90771	6.57726	0	0	0	0	0	0	0	0	0	0	0	6.65039	0	0	8.22644	0	0	0	0	0	8.20305	0	0	0	0	8.31082	9.28782	0	0
NADP-dependent malic enzyme, mitochondrial (NADP-ME) (EC 1.1.1.40) (Malic enzyme 3)	ME3	0	0	0	8.41561	0	0	0	0	0	0	0	0	0	0	0	0	9.6902	0	8.69123	0	0	0	8.62443	9.04629	0	0	7.91467	0	0	0	8.48523	8.20954	8.57128	9.13211	0	0	8.37538	9.04448	0	0	0	0	0	0	0	0	0	0
KN motif and ankyrin repeat domain-containing protein 3 (Ankyrin repeat domain-containing protein 47)	KANK3	0	0	0	0	8.85585	10.0564	9.95707	0	0	0	0	0	0	0	0	0	0	0	0	8.38698	0	0	9.21652	0	0	0	0	0	0	0	8.56665	8.75518	0	0	0	0	9.56072	0	0	0	0	0	0	0	0	0	0	0
FAS-associated death domain protein (FAS-associating death domain-containing protein) (Growth-inhibiting gene 3 protein) (Mediator of receptor induced toxicity)	FADD	0	9.77011	0	0	0	0	0	10.0364	9.13928	0	0	0	10.4244	0	9.98646	6.72304	8.3037	8.37523	5.11877	0	0	0	0	0	0	0	9.76999	11.3282	0	0	0	0	0	6.94442	0	9.06492	0	0	0	0	0	0	7.7376	0	8.7419	0	7.49828	9.73111
Autophagy-related protein 16-1 (APG16-like 1)	ATG16L1	0	0	0	0	0	0	0	0	0	0	0	0	0	0	0	0	8.24895	0	0	0	0	0	0	0	0	0	0	0	0	8.64603	0	0	0	0	8.6252	0	0	9.22762	10.3349	0	10.0031	0	0	9.23075	8.18264	0	0	0
Coagulation factor VII (EC 3.4.21.21) (Proconvertin) (Serum prothrombin conversion accelerator) (SPCA) (Eptacog alfa) [Cleaved into: Factor VII light chain; Factor VII heavy chain]	F7	0	0	0	8.45893	0	9.67878	10.0039	0	0	0	0	0	0	8.60412	0	0	0	0	8.46032	0	0	0	8.88536	8.99337	0	0	0	0	0	7.63047	8.34893	7.83098	0	0	0	0	9.05476	0	0	0	0	0	0	9.96567	0	8.47459	0	0
Glutathione hydrolase 1 proenzyme (EC 3.4.19.13) (Gamma-glutamyltransferase 1) (Gamma-glutamyltranspeptidase 1) (GGT 1) (EC 2.3.2.2) (Leukotriene-C4 hydrolase) (EC 3.4.19.14) (CD antigen CD224) [Cleaved into: Glutathione hydrolase 1 heavy chain; Glutathione hydrolase 1 light chain]	GGT1	0	0	0	0	9.52511	0	0	8.3942	0	0	0	0	0	8.91447	0	0	0	0	0	0	0	0	0	7.95244	0	0	0	0	0	7.45373	7.9175	0	0	0	7.16705	0	0	0	8.41641	0	0	9.49574	0	7.02359	0	0	0	9.50402
Asparagine synthetase [glutamine-hydrolyzing] (EC 6.3.5.4) (Cell cycle control protein TS11) (Glutamine-dependent asparagine synthetase)	ASNS	0	0	0	9.65037	0	0	0	0	0	0	0	0	0	0	0	0	0	0	8.85177	0	0	0	0	0	0	8.0676	0	0	0	0	9.65699	0	0	8.93093	6.78913	0	8.78393	0	0	0	0	0	0	0	0	0	0	0
GTPase IMAP family member 5 (Immune-associated nucleotide-binding protein 5) (Immunity-associated nucleotide 4-like 1 protein) (Immunity-associated nucleotide 5 protein) (IAN-5) (hIAN5) (Immunity-associated protein 3)	GIMAP5	0	0	0	0	0	0	10.2003	0	0	0	0	0	0	0	0	0	0	0	0	7.73146	0	0	8.39399	0	0	0	0	0	0	8.01876	0	8.48797	0	0	0	0	0	0	0	7.03441	0	8.41206	0	8.66469	0	0	0	0
Complement C1r subcomponent-like protein (C1r-LP) (C1r-like protein) (EC 3.4.21.-) (C1r-like serine protease analog protein) (CLSPa)	C1RL	0	0	9.44466	10.9675	0	9.16749	0	0	10.2406	0	0	10.6703	9.72153	10.2821	0	8.7225	0	0	0	0	0	10.7928	10.7071	11.4054	8.962	0	8.31208	0	8.01321	0	9.48846	11.4746	0	9.2928	9.23763	0	9.74768	0	0	0	0	0	0	12.122	0	9.28804	8.95602	10.4242
Hematopoietic prostaglandin D synthase (H-PGDS) (EC 5.3.99.2) (GST class-sigma) (Glutathione S-transferase) (EC 2.5.1.18) (Glutathione-dependent PGD synthase) (Glutathione-requiring prostaglandin D synthase) (Prostaglandin-H2 D-isomerase)	HPGDS	0	0	9.27598	7.86697	0	0	0	0	0	10.7271	0	0	0	0	0	0	0	0	0	0	0	0	9.86506	9.5396	10.5452	0	8.99911	0	0	9.23741	9.79528	10.1483	0	0	0	0	10.5036	10.825	0	0	0	0	0	0	0	0	0	0
Neutral alpha-glucosidase C (EC 3.2.1.20)	GANC	0	0	0	0	0	0	0	0	0	0	0	0	0	0	0	0	0	0	7.02997	0	0	9.84443	0	0	0	0	0	0	0	6.99558	0	0	0	0	0	0	0	0	0	0	0	0	0	0	0	0	0	0
Antileukoproteinase (ALP) (BLPI) (HUSI-1) (Mucus proteinase inhibitor) (MPI) (Protease inhibitor WAP4) (Secretory leukocyte protease inhibitor) (Seminal proteinase inhibitor) (WAP four-disulfide core domain protein 4)	SLPI	0	11.069	9.60517	10.4701	0	9.66169	11.6623	8.59	0	0	7.79277	0	0	0	9.79365	0	0	9.49464	0	0	0	0	0	10.9581	0	0	0	0	8.33263	11.5328	8.78657	0	0	0	0	0	0	0	0	8.84246	0	0	8.1358	9.27314	0	11.4362	0	0
Intraflagellar transport protein 25 homolog (Heat shock protein beta-11) (Hspb11) (Placental protein 25) (PP25)	IFT25	0	0	0	0	0	0	9.01905	0	0	9.75594	0	7.6543	0	8.80105	0	0	0	0	0	0	9.77968	9.1883	0	8.98449	10.2326	0	0	0	0	0	0	0	0	0	0	0	0	9.65644	10.4504	0	10.403	10.5008	0	9.67216	0	0	0	0
TATA-binding protein-associated factor 172 (EC 3.6.4.-) (ATP-dependent helicase BTAF1) (B-TFIID transcription factor-associated 170 kDa subunit) (TAF(II)170) (TBP-associated factor 172) (TAF-172)	BTAF1	0	0	0	0	0	0	0	0	0	0	0	0	0	0	0	0	0	0	0	0	0	0	0	0	0	0	0	0	0	0	0	8.4841	0	0	7.40875	0	0	0	0	0	0	0	0	0	0	0	0	0
Mitochondrial enolase superfamily member 1 (EC 4.2.1.68) (Antisense RNA to thymidylate synthase) (rTS) (L-fuconate dehydratase)	ENOSF1	0	0	0	0	0	0	0	0	0	0	0	0	0	8.75147	0	0	0	0	7.47575	0	0	0	8.83672	0	0	0	0	0	0	0	7.83116	0	0	7.5994	0	0	0	0	0	0	0	0	0	0	0	0	0	0
OX-2 membrane glycoprotein (CD antigen CD200)	CD200	0	0	0	0	8.80646	8.15666	10.6116	0	0	0	0	0	0	9.30442	0	0	9.74044	9.58769	9.98999	0	0	9.69113	9.06068	0	7.1111	0	0	8.52217	8.58697	8.76029	9.65897	10.2541	0	0	7.5034	0	8.98781	9.53	11.0737	0	6.42703	9.3367	0	10.303	10.0229	9.01799	0	0
Protein S100-B (S-100 protein beta chain) (S-100 protein subunit beta) (S100 calcium-binding protein B)	S100B	0	0	0	7.56998	8.99298	0	7.65974	0	0	8.39836	0	8.28843	10.7849	7.58443	0	8.3916	10.1997	0	7.93115	0	5.11368	0	0	9.49034	7.20011	0	9.14883	11.8658	0	8.06816	7.1777	9.08788	0	0	0	0	0	11.0458	8.1818	0	9.99444	0	0	6.35466	0	0	6.92293	8.59974
Ras-related protein Rab-28	RAB28	0	0	0	0	0	0	0	0	0	0	0	0	0	0	0	0	0	0	0	0	0	0	0	0	9.51411	0	0	0	0	0	0	0	0	0	0	0	0	0	0	0	0	0	0	0	0	0	0	0
CD177 antigen (Human neutrophil alloantigen 2a) (HNA-2a) (NB1 glycoprotein) (NB1 GP) (Polycythemia rubra vera protein 1) (PRV-1) (CD antigen CD177)	CD177	8.27334	12.2361	0	9.12744	0	9.49244	9.09143	12.2092	0	8.68921	8.67778	8.77325	0	8.77246	0	0	7.7294	9.40871	8.22115	10.3098	0	8.95864	9.04398	8.18859	9.73574	0	0	7.86689	11.8782	11.5358	8.19683	9.31346	11.3935	8.15779	10.8168	14.0433	0	8.51252	8.6723	7.28391	9.5608	11.4069	11.2394	10.3039	6.08758	9.71487	8.84954	11.5161
Perilipin-2 (Adipophilin) (Adipose differentiation-related protein) (ADRP)	PLIN2	0	0	0	0	0	0	0	0	9.12863	0	0	0	0	0	0	8.90176	0	0	0	0	8.05529	0	0	0	0	0	0	0	0	7.69449	0	0	0	7.64983	8.74679	9.26185	0	0	0	0	0	8.51206	0	9.56251	0	0	8.95042	0
WD repeat domain phosphoinositide-interacting protein 4 (WIPI-4) (WD repeat-containing protein 45)	WDR45	0	0	0	0	0	0	0	0	0	0	0	0	0	0	0	7.52506	8.57319	0	0	0	0	0	0	0	0	0	6.78981	0	0	0	0	7.6915	0	0	0	0	0	11.3883	0	0	0	0	0	0	0	0	0	0
FYVE, RhoGEF and PH domain-containing protein 4 (Actin filament-binding protein frabin) (FGD1-related F-actin-binding protein) (Zinc finger FYVE domain-containing protein 6)	FGD4	0	0	0	0	0	0	0	0	0	0	0	0	0	0	0	0	0	0	0	0	0	0	0	0	0	0	0	0	0	0	0	0	0	0	0	0	0	0	10.627	0	0	10.3088	0	0	0	0	0	0
WD repeat and FYVE domain-containing protein 3 (Autophagy-linked FYVE protein) (Alfy)	WDFY3	0	0	0	0	0	0	0	0	0	0	0	0	0	0	0	0	0	0	0	0	0	0	0	0	0	0	0	0	0	0	0	0	0	0	0	0	0	0	0	0	0	0	0	0	0	8.06838	0	0
Ubiquitin-conjugating enzyme E2 variant 3 (UEV-3) (EV and lactate/malate dehydrogenase domain-containing protein)	UEVLD	0	0	0	0	0	0	0	0	0	0	0	0	0	0	0	0	0	0	0	0	0	0	0	0	7.99201	8.62399	0	0	0	7.70343	0	0	10.5049	0	7.07413	0	0	9.25598	0	8.24088	0	8.71747	0	8.09033	0	0	9.12074	0
Atrial natriuretic peptide receptor 3 (Atrial natriuretic peptide clearance receptor) (Atrial natriuretic peptide receptor type C) (ANP-C) (ANPR-C) (NPR-C)	NPR3	0	0	0	0	0	0	0	0	0	7.64268	0	0	8.61697	0	0	0	0	0	6.03386	0	0	9.29074	0	0	7.89947	0	9.60579	0	0	0	7.67337	7.30407	0	0	0	0	0	0	7.66973	0	9.81778	0	0	7.26427	0	0	0	8.70958
Polypeptide N-acetylgalactosaminyltransferase 11 (EC 2.4.1.41) (Polypeptide GalNAc transferase 11) (GalNAc-T11) (pp-GaNTase 11) (Protein-UDP acetylgalactosaminyltransferase 11) (UDP-GalNAc:polypeptide N-acetylgalactosaminyltransferase 11)	GALNT11	0	0	0	0	0	0	0	0	0	0	0	0	0	0	0	0	0	0	0	0	0	0	0	0	0	8.76199	0	0	0	0	0	0	0	0	0	0	0	0	0	0	9.08109	0	0	0	0	0	0	0
Mitochondrial pyruvate carrier 1 (Brain protein 44-like protein)	MPC1	0	0	0	0	0	0	0	0	0	0	8.37626	0	0	9.2737	8.99685	0	0	0	6.99517	0	8.73226	0	0	0	0	0	0	8.94045	0	0	0	8.44854	0	9.60599	0	0	9.52616	0	0	0	0	0	0	0	0	0	0	8.68598
Notchless protein homolog 1	NLE1	0	0	0	0	0	0	0	0	0	0	0	0	0	0	0	0	0	0	0	0	0	0	0	0	0	0	0	0	0	0	0	0	0	9.14796	0	0	0	0	0	0	0	0	0	0	0	0	0	0
Histone deacetylase 3 (HD3) (EC 3.5.1.98) (Protein deacetylase HDAC3) (EC 3.5.1.-) (Protein deacylase HDAC3) (EC 3.5.1.-) (RPD3-2) (SMAP45)	HDAC3	0	0	0	0	0	0	0	0	0	0	0	0	0	0	0	0	0	0	0	0	0	0	0	0	0	0	0	0	0	0	0	0	0	0	0	0	0	0	0	0	0	0	0	0	0	0	0	0
Trafficking protein particle complex subunit 1 (BET5 homolog) (Multiple myeloma protein 2) (MUM-2)	TRAPPC1	0	0	7.89405	0	0	0	0	0	0	0	0	0	0	0	11.0351	0	0	0	0	0	7.31016	0	0	0	0	0	8.86847	0	0	0	0	0	8.55947	7.91862	0	7.64416	0	0	0	0	10.2669	0	8.3294	0	8.08494	9.47061	7.69888	0
DNA-directed RNA polymerase III subunit RPC6 (RNA polymerase III subunit C6) (DNA-directed RNA polymerase III subunit F) (RNA polymerase III 39 kDa subunit) (RPC39)	POLR3F	0	0	0	0	0	0	0	0	0	0	0	0	0	0	0	0	0	0	0	0	0	0	0	0	0	0	0	0	0	0	0	0	0	0	0	0	0	0	0	7.60347	0	0	0	0	7.58099	0	0	0
Bardet-Biedl syndrome 7 protein (BBS2-like protein 1)	BBS7	0	0	0	0	0	9.01732	0	0	10.2936	0	0	7.79897	0	0	0	0	0	8.70198	0	0	0	0	7.25281	11.1712	0	0	0	10.4434	0	10.4542	8.88379	0	10.5462	0	0	0	0	9.20498	0	9.44073	0	0	10.0307	0	8.57464	0	0	9.75704
Sarcosine dehydrogenase, mitochondrial (SarDH) (EC 1.5.8.3) (BPR-2)	SARDH	0	0	0	0	0	9.02442	9.80732	0	0	9.05885	0	0	0	0	0	0	0	0	0	0	0	0	8.65347	8.30218	0	0	0	10.4446	9.70903	7.97084	0	8.4267	9.45661	0	8.7964	0	0	10.0846	9.3641	9.06687	9.30789	0	9.17965	9.08622	0	8.42842	8.4606	0
NOP protein chaperone 1	NOPCHAP1	0	0	0	0	0	0	0	0	0	0	0	8.41733	0	0	0	0	0	0	0	8.01233	0	0	0	0	0	9.48409	0	0	0	0	0	0	0	0	0	0	0	11.1052	0	0	8.8203	0	0	0	0	0	0	0
Dynactin subunit 3 (Dynactin complex subunit 22 kDa subunit) (p22)	DCTN3	7.59618	0	0	0	0	0	0	0	0	0	7.7481	0	0	0	9.93727	8.11777	0	0	0	0	0	0	0	0	0	0	0	0	0	0	0	0	8.56722	0	0	0	0	0	0	0	0	0	8.05414	0	7.77995	0	7.06064	9.60414
Mediator of RNA polymerase II transcription subunit 12 (Activator-recruited cofactor 240 kDa component) (ARC240) (CAG repeat protein 45) (Mediator complex subunit 12) (OPA-containing protein) (Thyroid hormone receptor-associated protein complex 230 kDa component) (Trap230) (Trinucleotide repeat-containing gene 11 protein)	MED12	0	0	0	0	0	0	0	0	0	0	0	0	0	0	0	0	0	7.18584	0	0	0	0	0	0	0	0	0	0	6.98337	0	0	0	0	0	0	8.01748	8.12756	0	0	0	0	0	0	0	7.86169	8.06682	7.60833	0
Keratin, type I cytoskeletal 27 (Cytokeratin-27) (CK-27) (Keratin-25C) (K25C) (Keratin-27) (K27) (Type I inner root sheath-specific keratin-K25irs3)	KRT27	0	0	0	0	9.5435	0	7.86423	0	0	8.44458	0	8.48903	0	0	0	0	0	0	0	0	13.8122	7.22214	9.99474	0	6.98048	10.1789	0	0	0	0	0	0	0	10.7701	8.71088	0	0	9.76907	9.14269	0	10.0172	10.6262	0	6.81715	0	0	0	0
RNA polymerase-associated protein LEO1 (Replicative senescence down-regulated leo1-like protein)	LEO1	0	0	0	0	0	0	0	0	0	8.91761	0	7.21547	0	0	0	0	0	0	0	0	9.62054	8.2275	0	0	8.96957	9.01621	0	0	0	0	0	0	0	0	7.41426	0	8.49477	8.08871	0	0	0	0	0	0	9.6197	0	0	0
EKC/KEOPS complex subunit TPRKB (PRPK-binding protein) (TP53RK-binding protein)	TPRKB	0	0	0	0	0	0	0	0	0	0	7.67124	0	6.72706	0	0	0	0	0	0	0	6.93207	0	0	0	0	0	0	0	0	0	0	0	0	0	0	0	0	0	0	0	0	0	0	0	0	0	7.97949	9.20454
High affinity cationic amino acid transporter 1 (CAT-1) (CAT1) (Ecotropic retroviral leukemia receptor homolog) (Ecotropic retrovirus receptor homolog) (Solute carrier family 7 member 1) (System Y+ basic amino acid transporter)	SLC7A1	0	0	0	0	0	0	0	0	0	0	0	0	0	0	0	0	0	0	0	0	8.49139	0	0	0	0	0	0	0	0	0	0	0	0	0	0	0	0	0	0	0	0	0	0	0	0	0	0	0
UAP56-interacting factor (Forty-two-three domain-containing protein 1) (Protein 40-2-3)	FYTTD1	9.74809	0	0	0	0	0	0	0	0	0	8.25701	0	10.085	0	10.8583	0	8.69906	8.63782	0	0	9.48044	0	0	0	9.82821	0	8.22445	9.39515	0	0	0	0	7.3119	8.47274	0	9.04806	0	0	10.2609	8.39865	10.0852	0	8.19477	9.02105	8.72842	9.54713	8.87274	9.53127
Collagen alpha-2(VI) chain	COL6A2	0	0	9.14056	9.40775	7.86357	9.80219	10.5641	0	0	0	0	0	0	0	0	0	0	0	8.69488	0	0	7.25658	0	10.6435	9.67438	0	9.22645	0	0	10.0102	10.9936	10.0819	0	8.87288	0	0	0	8.06815	0	7.27233	10.0721	0	0	10.561	0	0	0	0
Bardet-Biedl syndrome 2 protein	BBS2	0	0	0	0	0	9.61698	0	0	0	0	0	0	0	0	0	0	0	0	0	0	9.55188	0	8.01766	0	8.54696	0	0	0	0	0	0	9.23607	10.7692	0	0	0	8.45071	0	0	10.2172	0	10.3394	0	9.57102	0	0	0	9.6376
LLGL scribble cell polarity complex component 2 (HGL) (Lethal(2) giant larvae protein homolog 2)	LLGL2	0	0	0	0	0	0	0	0	0	0	0	0	0	0	0	0	0	10.216	0	8.37796	0	0	0	0	0	11.0946	0	0	0	0	0	0	9.89236	0	0	0	0	0	9.64872	0	0	0	0	0	0	9.59995	0	0
P2Y purinoceptor 12 (P2Y12) (ADP-glucose receptor) (ADPG-R) (P2T(AC)) (P2Y(AC)) (P2Y(cyc)) (P2Y12 platelet ADP receptor) (P2Y(ADP)) (SP1999)	P2RY12	0	0	0	0	8.91718	0	0	10.6997	0	9.20308	9.21694	9.40993	0	0	0	9.93357	9.30838	0	9.40266	0	0	0	0	0	9.06438	0	0	0	9.99629	9.61036	0	0	10.9365	0	7.39928	0	0	9.83103	0	8.87305	9.76858	10.049	9.66427	9.27429	8.50223	0	0	9.60147
WD repeat-containing protein 35 (Intraflagellar transport protein 121 homolog)	WDR35	0	0	0	0	0	0	0	0	0	0	0	0	0	0	0	0	0	0	0	0	0	0	0	0	0	0	0	0	0	0	0	0	0	0	0	0	0	9.7162	0	0	0	0	0	0	0	0	0	0
Seizure 6-like protein 2	SEZ6L2	0	0	0	0	0	0	0	0	0	0	0	0	0	0	0	0	9.92796	0	0	0	0	0	0	0	0	0	0	10.6281	9.75015	0	0	0	0	0	0	10.3163	0	0	0	0	0	0	0	0	0	0	10.0781	0
Golgin subfamily A member 5 (Cell proliferation-inducing gene 31 protein) (Golgin-84) (Protein Ret-II) (RET-fused gene 5 protein)	GOLGA5	0	0	0	0	0	0	0	0	0	0	9.93113	0	0	0	11.1618	0	0	0	0	0	0	0	0	0	0	0	10.182	0	9.82521	0	0	0	0	0	0	8.36281	0	0	10.1457	7.18462	9.78567	0	9.11627	0	9.53334	9.87247	0	11.3464
Aquaporin-1 (AQP-1) (Aquaporin-CHIP) (Urine water channel) (Water channel protein for red blood cells and kidney proximal tubule)	AQP1	0	8.32073	0	0	10.5246	0	10.8931	8.26106	0	9.72701	9.96441	10.8136	7.40177	9.20261	11.2706	11.9668	10.0175	10.131	9.07638	0	0	0	10.1116	8.86835	9.01631	6.88095	0	8.61293	10.0814	9.09332	8.37804	8.60197	0	9.08189	8.23935	8.33955	0	10.3789	0	8.69857	9.45492	9.9986	10.2696	8.91487	10.7588	10.1887	10.0314	11.7986
Phosphatidylinositol 4-kinase beta (PI4K-beta) (PI4Kbeta) (PtdIns 4-kinase beta) (EC 2.7.1.67) (NPIK) (PI4K92) (PI4KIII)	PI4KB	0	0	0	0	0	0	0	0	0	0	0	0	0	0	0	0	0	0	0	0	0	0	0	0	0	0	0	0	0	0	0	0	0	0	0	0	0	0	0	0	0	0	0	0	0	0	0	0
Disabled homolog 2-interacting protein (DAB2 interaction protein) (DAB2-interacting protein) (ASK-interacting protein 1) (AIP-1) (DOC-2/DAB-2 interactive protein)	DAB2IP	0	8.77226	0	0	0	0	0	9.34141	9.62546	0	0	0	9.45292	0	0	0	0	0	0	0	0	0	0	0	0	0	0	0	0	0	0	0	0	0	0	0	0	0	0	0	7.97444	0	0	0	0	0	0	10.0402
ER membrane protein complex subunit 5 (Membrane magnesium transporter 1) (Transmembrane protein 32)	MMGT1	0	8.17216	0	0	8.98916	0	0	0	0	0	0	0	9.703	0	10.4734	8.71488	9.23438	0	0	0	0	0	0	7.07525	0	0	0	10.7003	0	0	0	0	0	6.84504	0	8.67571	0	0	0	0	0	0	0	0	8.22502	0	7.00295	9.99939
cGMP-inhibited 3',5'-cyclic phosphodiesterase 3A (EC 3.1.4.17) (Cyclic GMP-inhibited phosphodiesterase A) (CGI-PDE A) (cGMP-inhibited cAMP phosphodiesterase) (cGI-PDE)	PDE3A	0	0	0	0	9.39833	8.47489	10.0238	0	0	0	0	0	0	9.0838	11.0523	0	0	0	7.91412	0	0	0	8.76216	8.63354	0	9.35482	0	0	0	7.09416	9.10388	8.81713	0	0	0	0	8.99117	9.52231	0	0	9.03877	0	0	8.98069	0	0	0	0
U3 small nucleolar RNA-associated protein NOL7 (U3 snoRNA-associated protein NOL7) (Nucleolar protein 7) (Nucleolar protein of 27 kDa)	NOL7	0	0	0	0	0	0	0	0	10.3386	10.1398	0	8.2979	0	7.10125	0	0	0	0	0	0	9.8154	0	0	0	9.84405	0	0	9.99318	0	0	0	0	9.8992	0	0	0	0	0	0	0	0	0	9.53678	0	9.63923	9.63006	10.1279	0
PTB-containing, cubilin and LRP1-interacting protein (P-CLI1) (Phosphotyrosine interaction domain-containing protein 1) (Protein NYGGF4)	PID1	0	0	0	0	0	0	0	0	0	0	0	0	0	0	0	0	0	0	0	0	0	0	0	0	0	0	8.69236	0	0	0	0	0	0	7.10869	0	0	0	0	0	0	0	0	0	0	0	0	0	0
Protein kinase C epsilon type (EC 2.7.11.13) (nPKC-epsilon)	PRKCE	0	0	0	0	0	0	0	0	0	0	0	0	0	0	0	0	9.14927	0	0	0	0	0	0	0	0	0	0	0	0	0	0	0	0	0	0	0	0	0	0	0	0	0	0	0	0	6.6061	0	0
EMILIN-2 (Elastin microfibril interface-located protein 2) (Elastin microfibril interfacer 2) (Protein FOAP-10)	EMILIN2	0	0	8.47328	8.80592	8.93929	7.62649	10.1528	0	0	9.39895	8.8272	0	0	0	11.092	8.78345	0	9.63189	8.39912	0	0	10.2665	8.98702	8.88316	7.4458	8.04319	9.03343	8.65994	8.66741	8.48676	8.22847	8.08948	0	0	7.28777	8.02417	9.3692	0	9.23384	7.54107	8.09206	8.67022	0	9.24771	10.305	9.53851	0	9.9864
Secreted frizzled-related protein 4 (sFRP-4) (Frizzled protein, human endometrium) (FrpHE)	SFRP4	0	0	8.6647	8.80193	0	7.50819	10.7262	0	0	9.60794	0	0	0	0	0	0	0	0	0	0	0	0	0	9.43985	7.69308	0	9.15359	0	9.35614	0	10.1165	0	0	7.4269	8.39493	0	0	0	0	6.34984	0	11.0355	8.65263	7.93156	0	0	0	0
Pyroglutamyl-peptidase 1 (EC 3.4.19.3) (5-oxoprolyl-peptidase) (Pyroglutamyl aminopeptidase I) (PAP-I) (Pyroglutamyl-peptidase I) (PGP-I) (Pyrrolidone-carboxylate peptidase)	PGPEP1	0	0	0	0	0	0	0	0	0	0	0	0	0	0	0	7.96768	0	8.25833	0	0	0	0	0	0	0	0	0	0	0	0	0	0	0	0	0	0	0	0	0	0	0	0	8.28937	0	8.6102	0	7.32453	0
Ras-specific guanine nucleotide-releasing factor 2 (Ras-GRF2) (Ras guanine nucleotide exchange factor 2)	RASGRF2	0	10.3901	0	0	0	6.30666	0	0	0	0	0	0	10.5221	0	0	0	8.59081	8.65872	0	0	0	0	0	0	0	0	0	10.4716	8.81052	0	8.12052	7.83091	9.07113	0	0	0	0	0	0	0	0	0	8.48448	0	0	0	0	0
RNA polymerase II-associated protein 3	RPAP3	0	0	0	0	0	0	0	8.22714	8.70643	0	0	0	8.6289	0	10.5067	8.96762	7.58641	0	0	0	0	8.93141	0	0	8.51395	0	7.51428	0	8.25798	0	0	0	0	0	0	9.18942	0	0	9.56314	8.72564	9.30465	0	8.74172	0	7.85429	0	8.56083	0
Poliovirus receptor (Nectin-like protein 5) (NECL-5) (CD antigen CD155)	PVR	0	0	0	0	0	0	0	0	0	0	0	0	0	0	0	0	9.89395	0	0	0	0	0	0	0	9.99374	0	0	0	0	0	0	0	0	0	0	0	0	0	0	11.3715	0	0	0	0	0	0	0	0
Protein arginine methyltransferase NDUFAF7, mitochondrial (EC 2.1.1.320) (NADH dehydrogenase [ubiquinone] complex I, assembly factor 7) (Protein midA homolog)	NDUFAF7	0	0	0	0	0	0	0	0	0	0	0	0	0	0	0	0	8.97665	0	0	0	0	0	0	0	0	0	0	0	0	0	0	0	0	7.52064	0	8.74431	0	0	0	0	0	0	0	0	6.80033	0	0	9.6769
Zinc finger protein 24 (Retinoic acid suppression protein A) (RSG-A) (Zinc finger and SCAN domain-containing protein 3) (Zinc finger protein 191) (Zinc finger protein KOX17)	ZNF24	0	0	0	0	0	0	0	0	0	0	8.17416	0	0	0	9.91621	9.02078	0	8.89095	0	0	9.0879	0	7.65632	0	9.22456	9.22241	8.44354	0	9.49836	0	0	0	9.29216	0	0	8.98416	0	0	0	0	0	0	9.22325	0	9.30082	9.20683	8.10602	10.486
Bridge-like lipid transfer protein family member 3B (Syntaxin-6 Habc-interacting protein of 164 kDa) (UHRF1-binding protein 1-like)	BLTP3B	0	0	0	0	0	0	0	9.88692	0	0	0	0	0	0	0	0	9.04332	8.54785	0	0	0	0	0	0	0	0	0	10.2729	8.60656	0	0	0	0	0	8.29308	8.25481	8.25829	0	0	7.60121	0	0	7.02132	0	8.48266	7.19776	0	0
Src kinase-associated phosphoprotein 2 (Pyk2/RAFTK-associated protein) (Retinoic acid-induced protein 70) (SKAP55 homolog) (SKAP-55HOM) (SKAP-HOM) (Src family-associated phosphoprotein 2) (Src kinase-associated phosphoprotein 55-related protein) (Src-associated adapter protein with PH and SH3 domains)	SKAP2	0	0	0	0	9.91381	9.09422	0	0	0	0	0	0	0	8.83475	0	0	0	0	8.66536	0	10.0128	0	0	8.45744	9.85719	8.74544	0	0	0	9.07492	8.57057	8.13788	0	0	8.86778	0	7.3066	8.61571	0	0	0	9.20949	0	8.88855	0	0	0	9.48414
Sialoadhesin (Sialic acid-binding Ig-like lectin 1) (Siglec-1) (CD antigen CD169)	SIGLEC1	7.03892	0	0	7.29301	0	7.92247	9.84583	0	0	0	0	0	0	7.82078	0	9.24805	0	0	8.34337	0	0	0	9.30838	8.59866	0	0	0	0	0	8.45175	9.5787	9.15577	0	0	0	8.33283	7.39258	9.68083	0	0	8.60053	11.2641	0	9.63205	8.62506	0	8.15911	0
Stonin-2 (Stoned B)	STON2	0	0	0	0	0	8.36132	9.05564	0	0	0	0	0	0	0	0	0	0	0	0	0	0	0	7.49836	7.25926	0	0	0	8.64306	0	0	7.62556	0	0	0	0	0	0	8.56589	0	0	9.24314	0	0	9.0554	0	0	0	0
Deoxycytidine kinase (dCK) (EC 2.7.1.74) (Deoxyadenosine kinase) (EC 2.7.1.76) (Deoxyguanosine kinase) (EC 2.7.1.113)	DCK	0	0	0	0	0	0	0	0	0	0	0	0	10.9307	0	0	0	0	0	0	0	0	0	0	0	0	9.79207	9.29978	0	8.40975	0	0	0	0	0	9.26665	9.44003	8.60088	0	9.84994	0	0	0	0	0	0	0	0	0
Eukaryotic translation elongation factor 1 epsilon-1 (Aminoacyl tRNA synthetase complex-interacting multifunctional protein 3) (Elongation factor p18) (Multisynthase complex auxiliary component p18)	EEF1E1	8.23939	9.73773	0	0	0	0	0	8.21315	8.65223	0	0	0	9.66465	0	9.43916	0	9.53313	8.73057	0	0	0	0	0	0	7.44982	7.27735	0	0	0	0	0	0	8.64897	8.47634	7.73905	9.0929	0	0	0	8.58336	7.87433	0	0	0	7.66671	9.20343	0	8.20736
Ribosomal oxygenase 1 (60S ribosomal protein L8 histidine hydroxylase) (Bifunctional lysine-specific demethylase and histidyl-hydroxylase NO66) (EC 1.14.11.27, EC 1.14.11.79) (Myc-associated protein with JmjC domain) (Nucleolar protein 66) (hsNO66) (Ribosomal oxygenase NO66) (ROX)	RIOX1	0	0	0	0	0	0	0	0	0	0	7.84782	0	0	0	0	7.42108	0	0	0	0	0	0	0	0	0	0	8.83958	0	8.67957	0	0	0	9.76618	0	0	0	0	0	0	0	0	0	8.92609	0	0	0	0	0
SR-related and CTD-associated factor 8 (CDC5L complex-associated protein 7) (RNA-binding motif protein 16)	SCAF8	0	0	0	0	0	0	0	0	0	0	0	0	0	0	0	0	0	0	0	0	0	0	0	0	0	0	0	0	0	0	0	0	0	0	0	7.71604	0	0	0	0	0	0	0	0	0	0	0	10.0559
DNA replication licensing factor MCM7 (EC 3.6.4.12) (CDC47 homolog) (P1.1-MCM3)	MCM7	0	0	0	0	0	0	0	0	0	0	0	6.48994	0	0	10.4642	0	0	0	0	0	0	0	0	0	0	0	0	0	0	0	0	0	0	8.22521	6.69604	9.68199	7.74872	0	8.91998	0	0	0	0	0	0	0	9.04247	0
Pre-mRNA-splicing factor CWC22 homolog (Nucampholin homolog) (fSAPb)	CWC22	0	0	0	0	0	0	8.26102	0	0	8.32863	0	0	0	0	0	0	0	0	0	0	9.69325	7.83754	0	0	0	7.97663	0	0	0	8.47488	0	0	0	0	8.06109	0	0	9.12862	8.32526	9.72658	9.02855	0	0	7.7818	0	0	0	0
Krueppel-like factor 12 (Transcriptional repressor AP-2rep)	KLF12	0	8.04371	0	0	7.15613	0	0	0	0	7.78029	0	0	0	0	0	0	0	0	0	0	9.15328	0	0	0	9.88851	0	0	0	0	0	0	0	0	0	0	0	7.50311	0	0	0	8.52902	0	0	0	0	7.60275	0	0
Syndecan-4 (SYND4) (Amphiglycan) (Ryudocan core protein)	SDC4	0	0	0	0	8.11403	0	7.70107	0	0	0	0	0	0	9.8694	8.8657	0	10.472	9.65236	0	0	0	0	0	0	8.39508	7.0042	9.69004	0	0	0	0	0	0	0	0	0	0	0	8.62053	0	0	8.38062	0	0	11.1764	10.0774	0	9.24375
Resistin (Adipose tissue-specific secretory factor) (ADSF) (C/EBP-epsilon-regulated myeloid-specific secreted cysteine-rich protein) (Cysteine-rich secreted protein A12-alpha-like 2) (Cysteine-rich secreted protein FIZZ3)	RETN	0	0	0	0	9.57443	10.537	0	0	0	0	0	9.1522	0	11.0368	0	0	0	0	0	8.72662	0	8.82738	0	9.6529	0	0	0	0	0	0	0	9.75735	0	0	9.81732	0	0	0	0	8.12922	0	8.67937	0	10.3638	0	0	0	8.23763
sn-1-specific diacylglycerol lipase ABHD11 (EC 3.1.1.116) (Alpha/beta hydrolase domain-containing protein 11) (Abhydrolase domain-containing protein 11) (Williams-Beuren syndrome chromosomal region 21 protein)	ABHD11	6.92361	0	0	0	0	0	0	0	0	0	8.61335	0	0	7.67498	10.1192	7.6649	0	0	0	0	0	0	0	0	0	0	0	8.73077	0	0	0	0	9.18086	7.93257	0	0	0	0	0	0	0	0	8.26362	0	0	0	7.54202	0
U6 snRNA-associated Sm-like protein LSm1 (Cancer-associated Sm-like) (Small nuclear ribonuclear CaSm)	LSM1	0	0	0	0	0	0	0	0	0	0	0	0	10.6238	8.41806	10.0664	0	0	0	0	0	0	0	0	0	0	0	8.73319	10.9359	0	0	0	0	0	0	0	0	0	0	0	0	0	0	7.07561	0	0	0	7.17756	10.695
Chymase (EC 3.4.21.39) (Alpha-chymase) (Mast cell protease I)	CMA1	0	7.3608	9.93326	9.02772	9.48985	9.98015	9.88879	0	0	0	0	0	0	0	0	9.47887	0	0	9.05758	0	0	0	12.162	7.28948	0	0	0	7.82527	9.91442	9.50916	9.69433	8.88951	6.97037	7.31607	0	0	0	0	11.3063	0	0	0	7.04946	9.48006	10.3039	9.74491	0	0
Hepatocyte growth factor receptor (HGF receptor) (EC 2.7.10.1) (HGF/SF receptor) (Proto-oncogene c-Met) (Scatter factor receptor) (SF receptor) (Tyrosine-protein kinase Met)	MET	0	0	0	0	0	0	0	0	0	0	0	7.04387	0	8.27527	0	0	0	0	0	7.10322	0	0	0	0	0	0	0	0	0	0	0	0	0	0	7.64333	0	0	0	0	0	0	0	0	0	9.27315	0	8.8725	10.0821
Peroxisomal 2,4-dienoyl-CoA reductase [(3E)-enoyl-CoA-producing] (pDCR) (EC 1.3.1.124) (2,4-dienoyl-CoA reductase 2) (Short chain dehydrogenase/reductase family 17C member 1)	DECR2	0	0	0	0	0	9.10259	0	0	0	0	0	0	0	0	0	0	0	0	8.93756	0	0	0	0	0	0	10.7981	0	0	0	8.23187	0	0	0	9.86574	0	0	8.96408	0	10.0503	0	0	0	0	0	0	0	0	0
WW domain-containing oxidoreductase (EC 1.1.1.-) (Fragile site FRA16D oxidoreductase) (Short chain dehydrogenase/reductase family 41C member 1)	WWOX	0	0	0	0	0	0	0	0	0	0	0	0	0	0	0	0	0	0	0	0	0	0	0	0	0	0	0	0	0	0	0	0	0	0	0	0	0	0	0	0	0	0	0	0	0	0	0	0
Tumor protein D52 (Protein N8)	TPD52	8.0054	9.22164	0	0	0	0	0	9.99663	8.56745	0	8.61401	0	8.24258	0	8.65659	8.03929	11.43	9.45974	0	0	0	0	0	0	0	0	0	8.20032	0	0	0	0	0	0	0	8.21497	0	0	7.14042	0	0	0	8.53906	0	8.75196	10.5008	6.98172	0
Pseudouridylate synthase 7 homolog (EC 5.4.99.-)	PUS7	0	0	0	0	0	0	0	0	0	0	0	0	0	0	0	0	0	0	0	0	0	0	0	0	0	8.71769	7.3945	0	0	0	0	0	0	0	0	8.22882	0	0	0	0	0	0	0	0	0	0	0	0
Amidophosphoribosyltransferase (ATase) (EC 2.4.2.14) (Glutamine phosphoribosylpyrophosphate amidotransferase) (GPAT)	PPAT	0	0	0	0	0	0	9.32168	0	0	0	0	0	0	0	0	0	0	0	0	8.34919	0	9.6159	8.27578	0	9.30679	0	8.05364	0	0	8.23162	0	8.89675	0	0	9.1159	7.99316	0	9.28086	0	0	0	9.19775	0	0	0	0	0	0
NAD-dependent protein deacetylase sirtuin-3, mitochondrial (hSIRT3) (EC 2.3.1.286) (Regulatory protein SIR2 homolog 3) (SIR2-like protein 3)	SIRT3	0	0	0	0	0	0	0	0	0	0	0	0	0	0	10.0241	0	8.20406	0	0	0	8.69652	0	0	0	0	0	0	0	0	0	8.05241	0	0	9.25461	0	0	0	0	0	0	9.39223	0	0	0	0	0	0	9.52823
Synaptotagmin-15 (Chr10Syt) (Synaptotagmin XV) (SytXV)	SYT15	0	0	0	0	0	0	0	0	0	0	0	0	0	0	0	0	0	0	0	0	0	0	8.64111	0	0	0	7.25434	0	0	0	0	0	0	0	0	0	7.94094	9.45551	0	0	0	0	0	0	0	0	0	0
Glucose-6-phosphatase 3 (G-6-Pase 3) (G6Pase 3) (EC 3.1.3.9) (Glucose-6-phosphatase beta) (G6Pase-beta) (Ubiquitous glucose-6-phosphatase catalytic subunit-related protein)	G6PC3	0	0	0	0	0	0	0	0	0	9.49357	9.08217	0	0	0	0	0	0	0	0	0	0	0	8.11074	0	0	0	0	0	0	0	8.35281	0	0	0	0	0	0	11.1057	0	0	0	0	0	0	0	0	0	0
RNA N6-adenosine-methyltransferase METTL16 (Methyltransferase 10 domain-containing protein) (Methyltransferase-like protein 16) (N6-adenosine-methyltransferase METTL16) (EC 2.1.1.348) (U6 small nuclear RNA (adenine-(43)-N(6))-methyltransferase) (EC 2.1.1.346)	METTL16	0	0	0	0	0	0	0	0	0	0	0	0	0	0	0	0	0	0	0	0	0	0	0	8.18988	0	0	0	0	0	0	0	9.23468	0	0	0	0	9.54972	0	0	0	0	0	0	0	0	0	0	0
Protein CMSS1 (Cms1 ribosomal small subunit homolog)	CMSS1	0	0	0	0	0	0	0	0	0	0	0	0	0	0	10.5908	0	0	0	0	0	0	0	0	0	0	0	0	0	0	0	0	0	0	0	0	0	0	0	0	0	0	0	0	0	9.45229	0	0	0
Glutaredoxin-related protein 5, mitochondrial (Monothiol glutaredoxin-5)	GLRX5	0	0	0	0	0	0	0	0	9.18068	0	0	0	0	0	0	0	0	0	0	0	0	0	0	0	0	0	0	0	0	0	0	0	0	7.32328	0	9.11577	0	0	0	0	0	0	0	0	0	10.8068	0	0
Protein THEMIS2 (Induced by contact to basement membrane 1 protein) (Protein ICB-1) (Thymocyte-expressed molecule involved in selection protein 2)	THEMIS2	0	0	0	0	0	0	0	0	0	0	0	0	0	0	0	0	0	0	0	0	8.2974	0	0	0	0	0	0	0	0	0	8.27943	7.92223	0	0	6.92785	0	0	0	0	0	0	9.05974	0	0	0	0	0	0
ATP synthase mitochondrial F1 complex assembly factor 2 (ATP12 homolog)	ATPAF2	0	0	0	0	8.10051	0	0	0	0	0	0	0	0	0	0	0	0	0	0	6.92534	9.39595	0	0	0	0	8.47081	0	0	0	0	0	0	0	0	7.62187	0	0	0	8.93704	0	8.14507	0	0	7.94717	0	0	0	0
Liprin-beta-2 (Protein tyrosine phosphatase receptor type f polypeptide-interacting protein-binding protein 2) (PTPRF-interacting protein-binding protein 2)	PPFIBP2	0	0	0	0	0	0	0	0	0	0	0	0	0	0	0	0	0	8.20635	0	0	0	0	0	0	0	0	0	0	0	0	8.88627	0	0	0	0	8.92448	0	0	0	7.54506	0	0	0	0	8.31123	9.82626	0	0
RNA 3'-terminal phosphate cyclase-like protein	RCL1	0	0	0	0	0	0	0	0	0	9.21709	0	0	0	0	0	0	0	0	0	0	0	0	0	0	0	8.81162	0	0	0	0	0	0	0	0	0	0	0	0	0	9.03842	0	0	0	0	0	0	0	0
Dual specificity calcium/calmodulin-dependent 3',5'-cyclic nucleotide phosphodiesterase 1A (Cam-PDE 1A) (EC 3.1.4.17) (61 kDa Cam-PDE) (hCam-1)	PDE1A	0	0	0	0	0	0	0	10.1516	10.4264	0	0	8.10413	10.8727	0	0	0	0	0	0	8.69446	0	0	0	0	9.37847	0	9.11489	0	9.17269	0	0	8.35455	0	0	0	9.5619	0	0	9.24011	9.63885	10.0545	9.5035	9.25013	0	0	0	9.45633	9.79187
Coilin (p80-coilin)	COIL	0	0	0	0	0	0	0	8.65467	0	7.79734	0	7.43592	0	0	8.29745	0	0	0	0	6.15745	0	7.95412	0	0	0	9.12137	0	0	0	0	0	0	0	8.80627	0	0	0	0	0	0	0	0	0	0	0	0	0	0
ATPase family gene 2 protein homolog A (EC 3.6.4.10) (AFG2 AAA ATPase homolog A) (Ribosome biogenesis protein SPATA5) (Spermatogenesis-associated factor protein) (Spermatogenesis-associated protein 5)	AFG2A	9.3851	0	0	0	0	0	0	10.9044	9.83048	0	8.45417	0	0	0	0	8.06075	0	8.87732	7.92128	0	0	0	0	0	0	0	0	0	0	0	0	0	8.47063	0	0	0	0	0	0	7.71112	0	0	8.72773	0	8.27193	9.28394	0	10.4927
N-sulphoglucosamine sulphohydrolase (EC 3.10.1.1) (Sulfoglucosamine sulfamidase) (Sulphamidase)	SGSH	0	0	0	8.46117	0	0	0	0	0	0	0	0	0	0	8.07821	10.1779	0	0	8.44229	7.6603	8.84423	0	8.4187	0	9.66652	8.50004	0	0	0	0	0	0	0	0	7.60721	0	0	0	8.44856	0	9.96317	0	0	8.85789	0	0	9.99492	0
Tyrosine-protein kinase Fyn (EC 2.7.10.2) (Proto-oncogene Syn) (Proto-oncogene c-Fyn) (Src-like kinase) (SLK) (p59-Fyn)	FYN	0	0	0	0	0	0	0	0	0	0	0	0	0	0	0	0	8.8361	0	0	0	0	0	0	7.94194	0	0	8.00437	0	0	0	0	0	0	0	0	0	0	0	9.25637	0	0	10.2745	0	0	0	0	0	10.7379
Ubiquinone biosynthesis monooxygenase COQ6, mitochondrial (EC 1.14.13.-) (Coenzyme Q10 monooxygenase 6)	COQ6	0	10.4077	0	0	7.81795	0	0	0	10.68	0	0	0	9.55385	0	10.6567	8.65972	0	0	0	0	10.0317	0	8.72742	0	9.1904	7.76185	0	10.5489	0	0	0	0	0	8.77642	0	0	0	0	0	0	7.7113	0	0	0	0	0	0	0
Sorting nexin-33 (SH3 and PX domain-containing protein 3)	SNX33	0	0	10.5089	0	0	9.05422	0	0	0	0	0	0	0	0	0	0	0	0	9.55842	0	0	0	8.61237	9.16924	0	0	0	0	0	0	8.88161	9.43966	0	0	0	0	10.5054	0	0	0	0	0	0	0	0	0	0	0
Multiple myeloma tumor-associated protein 2 (hMMTAG2)	MMTAG2	0	0	0	0	0	0	0	0	0	0	0	0	0	0	0	0	0	0	0	0	13.8272	0	0	0	0	0	0	0	0	0	0	0	0	0	0	0	0	0	0	0	0	0	0	0	0	0	0	0
5'-nucleotidase domain-containing protein 3 (EC 3.1.3.-) (GRP94-neighboring nucleotidase)	NT5DC3	0	0	0	0	0	0	0	0	0	0	0	0	0	0	0	0	9.69304	0	0	0	0	0	0	0	0	0	0	10.3876	0	0	0	0	0	0	0	9.94251	0	0	0	0	0	0	0	0	0	0	0	10.8716
Serine/threonine-protein phosphatase 2B catalytic subunit gamma isoform (EC 3.1.3.16) (CAM-PRP catalytic subunit) (Calcineurin, testis-specific catalytic subunit) (Calmodulin-dependent calcineurin A subunit gamma isoform)	PPP3CC	0	0	0	0	0	0	0	0	0	0	0	0	0	0	0	0	0	0	0	0	0	0	0	0	0	11.2811	0	0	0	0	0	0	0	0	0	0	0	0	0	9.22146	11.4457	0	0	0	0	0	0	0
SHC-transforming protein 1 (SHC-transforming protein 3) (SHC-transforming protein A) (Src homology 2 domain-containing-transforming protein C1) (SH2 domain protein C1)	SHC1	0	0	0	0	0	0	0	0	0	0	0	0	0	0	0	0	0	0	0	0	0	0	0	0	0	0	0	0	0	0	0	0	0	7.56676	0	0	0	0	0	0	0	0	0	0	0	0	0	0
Immunoglobulin heavy variable 3-73	IGHV3-73	0	0	11.9408	13.4837	0	11.5903	12.5347	12.6385	13.076	0	10.3382	14.4535	0	12.754	12.843	10.3986	8.75309	10.542	13.0605	13.4993	9.2386	0	12.2691	10.9358	0	0	8.85609	13.858	0	10.7165	12.6545	12.683	0	10.4461	10.0039	0	10.0305	12.3264	0	10.2045	0	12.8296	0	10.8542	11.7835	11.5734	11.7686	12.9872
SAP30-binding protein (Transcriptional regulator protein HCNGP)	SAP30BP	0	0	0	0	0	0	0	0	0	8.85913	0	11.0211	0	0	0	0	0	0	0	7.41244	0	0	0	0	10.6294	11.0679	0	0	0	7.4322	0	0	0	0	0	0	0	9.82455	10.3761	0	7.76854	0	0	0	0	0	0	8.07801
Sentrin-specific protease 8 (EC 3.4.22.-) (Deneddylase-1) (NEDD8-specific protease 1) (Protease, cysteine 2) (Sentrin/SUMO-specific protease SENP8)	SENP8	0	0	0	0	0	0	0	0	0	0	0	0	0	0	0	0	0	0	0	0	0	0	0	8.04047	0	0	0	0	0	0	0	0	0	0	0	0	0	0	0	0	0	0	0	0	0	0	0	0
Membralin (Transmembrane protein 259)	TMEM259	0	0	0	0	0	0	0	0	0	0	0	0	0	0	0	0	0	0	0	0	0	0	0	0	0	0	0	0	0	0	0	0	0	0	0	0	0	8.85146	0	0	0	0	0	0	0	0	0	0
Plectin (PCN) (PLTN) (Hemidesmosomal protein 1) (HD1) (Plectin-1)	PLEC	0	0	0	0	0	0	0	0	0	0	0	0	0	0	0	0	0	0	0	0	0	0	0	0	0	0	8.14393	0	0	8.69691	0	0	0	8.3163	0	0	7.07389	9.60512	9.35566	8.48427	0	0	0	0	8.81632	9.33513	7.57212	0
DnaJ homolog subfamily C member 16 (Endoplasmic reticulum DNA J domain-containing protein 8) (ER-resident protein ERdj8) (ERdj8)	DNAJC16	0	0	0	0	0	0	0	0	0	0	0	0	0	0	0	0	0	9.32025	0	0	0	0	0	0	0	0	0	0	0	0	0	0	0	0	0	0	0	11.1036	0	0	0	0	0	0	0	0	0	0
PHD finger protein 3	PHF3	0	0	0	0	0	0	0	0	7.95875	0	0	0	0	0	0	0	0	0	0	0	10.3566	0	0	0	8.29414	0	0	0	0	6.44619	0	0	9.87172	0	0	0	0	9.10163	0	0	0	0	9.85835	0	9.23993	9.40319	0	0
Serpin B10 (Bomapin) (Peptidase inhibitor 10) (PI-10)	SERPINB10	0	0	7.87012	7.81742	8.93714	0	0	0	0	0	0	0	0	10.2787	0	0	0	0	9.63961	0	0	0	7.96888	7.55944	0	0	0	0	0	0	0	8.93815	0	0	8.47621	7.66228	8.8746	0	0	0	0	9.10968	0	9.34578	0	0	0	7.82092
Eukaryotic translation initiation factor 4E type 3 (eIF-4E type 3) (eIF-4E3) (eIF4E type 3) (eIF4E-3)	EIF4E3	0	0	0	0	0	7.81717	0	0	0	0	0	0	0	0	0	8.10261	0	0	8.00008	0	0	0	8.59459	0	0	0	0	0	0	0	8.0244	8.86357	9.92275	9.0136	0	0	8.1811	0	0	0	0	0	10.1308	0	0	0	0	11.9921
DmX-like protein 2 (Rabconnectin-3)	DMXL2	0	0	0	0	0	0	0	0	0	0	8.5683	0	0	0	0	0	10.482	0	0	0	0	0	0	0	0	0	0	10.9529	0	0	0	0	8.08607	0	0	0	0	0	0	0	0	0	0	0	0	0	8.16687	0
Rap guanine nucleotide exchange factor 2 (Cyclic nucleotide ras GEF) (CNrasGEF) (Neural RAP guanine nucleotide exchange protein) (nRap GEP) (PDZ domain-containing guanine nucleotide exchange factor 1) (PDZ-GEF1) (RA-GEF-1) (Ras/Rap1-associating GEF-1)	RAPGEF2	0	0	0	8.29177	0	0	0	0	0	0	0	7.61617	0	0	0	0	0	0	0	0	0	0	0	0	0	0	0	0	0	0	0	0	0	8.28588	0	0	0	9.89821	0	0	0	0	0	0	0	0	0	0
Zinc finger CCCH domain-containing protein 14 (Mammalian suppressor of tau pathology-2) (MSUT-2) (Renal carcinoma antigen NY-REN-37)	ZC3H14	0	0	0	0	0	0	0	0	0	0	8.39714	0	0	0	10.4161	0	0	8.57879	0	0	6.83703	0	0	0	0	0	0	0	0	0	0	0	9.10953	5.55559	0	8.47688	0	0	9.05973	7.20021	0	8.52161	8.86712	0	8.82807	10.0186	8.05314	8.90517
Protein CREG1 (Cellular repressor of E1A-stimulated genes 1)	CREG1	0	0	9.18634	8.52454	9.36482	0	8.34359	0	0	0	0	0	0	8.75433	0	0	0	0	9.02147	0	0	8.19982	0	8.97833	0	0	0	0	0	0	0	0	0	0	0	0	0	8.34567	0	0	0	0	0	8.296	0	0	0	8.63926
Anaphase-promoting complex subunit 1 (APC1) (Cyclosome subunit 1) (Mitotic checkpoint regulator) (Testis-specific gene 24 protein)	ANAPC1	0	0	0	0	0	8.7133	0	0	0	0	0	5.28058	0	0	0	0	0	0	0	5.79328	8.48667	0	0	0	0	9.41554	0	0	0	5.58968	0	0	0	0	6.80016	0	0	0	0	9.40934	8.63177	9.19227	0	8.63285	0	0	0	0
Breakpoint cluster region protein (EC 2.7.11.1) (Renal carcinoma antigen NY-REN-26)	BCR	9.01564	10.1056	0	0	0	0	0	10.7551	9.85671	0	8.95713	8.96559	0	0	10.5307	7.69906	10.489	10.9806	0	0	0	0	9.18746	0	0	0	0	9.87887	10.6774	0	0	8.92476	11.1376	0	0	9.77009	0	0	9.48771	0	0	0	10.5064	0	11.5334	12.1957	0	9.63681
Small ribosomal subunit protein bS21m (28S ribosomal protein S21, mitochondrial) (MRP-S21) (S21mt)	MRPS21	0	0	0	0	0	0	0	0	0	0	0	0	0	0	0	0	0	0	0	0	10.3454	0	0	0	7.8665	0	8.72565	10.0192	0	0	0	0	0	0	0	8.78055	0	0	0	6.70529	0	0	0	0	8.05082	0	7.99602	9.15257
Protein LZIC (Leucine zipper and CTNNBIP1 domain-containing protein) (Leucine zipper and ICAT homologous domain-containing protein)	LZIC	8.34731	10.1983	8.32704	0	0	0	0	9.53731	9.54765	0	7.1307	0	9.35488	0	10.2037	9.00994	8.39065	8.38025	5.94695	0	0	0	5.46966	0	0	0	9.56135	8.77298	9.34163	0	0	0	8.91819	0	0	8.55416	0	0	0	0	0	0	8.65878	0	8.61995	9.87229	8.12845	9.0012
Coiled-coil domain-containing protein 80 (Down-regulated by oncogenes protein 1) (Up-regulated in BRS-3 deficient mouse homolog)	CCDC80	0	0	0	10.0181	0	9.02126	0	0	0	9.70506	0	0	0	0	0	0	0	0	0	0	8.78265	0	0	0	0	0	0	0	0	7.3657	0	0	0	0	7.08943	0	11.9261	0	0	0	9.16684	0	0	0	0	0	0	9.5647
Girdin (Akt phosphorylation enhancer) (APE) (Coiled-coil domain-containing protein 88A) (G alpha-interacting vesicle-associated protein) (GIV) (Girders of actin filament) (Hook-related protein 1) (HkRP1)	CCDC88A	0	0	0	0	0	0	8.63608	0	9.2146	0	0	0	0	0	0	8.68866	8.21544	0	0	0	0	0	0	0	0	7.93097	0	0	9.01318	0	0	0	9.54851	0	0	0	0	8.47543	8.35552	7.22835	9.01627	8.63582	8.66042	8.61002	0	0	8.98619	9.84717
Small ribosomal subunit protein uS7m (28S ribosomal protein S7, mitochondrial) (MRP-S7) (S7mt) (bMRP-27a) (bMRP27a)	MRPS7	0	9.4114	0	0	0	0	0	9.7316	9.57019	0	0	0	0	0	0	0	0	8.1025	0	0	0	0	0	0	0	0	0	0	0	0	0	0	8.06732	0	0	7.62423	0	0	0	0	0	0	7.70031	0	7.53615	9.99533	0	0
Mitochondrial adenyl nucleotide antiporter SLC25A25 (Mitochondrial ATP-Mg/Pi carrier protein 3) (Mitochondrial Ca(2+)-dependent solute carrier protein 3) (Short calcium-binding mitochondrial carrier protein 2) (SCaMC-2) (Solute carrier family 25 member 25)	SLC25A25	0	0	0	0	0	0	0	11.5478	0	0	0	0	0	0	0	0	8.67228	0	0	0	0	0	0	0	0	0	0	11.1193	0	0	0	0	0	0	0	0	7.70196	0	0	0	0	0	0	0	0	0	0	0
Phospholipid-transporting ATPase IA (EC 7.6.2.1) (ATPase class I type 8A member 1) (Chromaffin granule ATPase II) (P4-ATPase flippase complex alpha subunit ATP8A1)	ATP8A1	0	0	0	7.74016	8.21078	9.02424	7.48591	0	0	0	0	0	0	8.82714	0	0	11.4639	9.78832	9.26495	8.02303	0	7.83749	7.87524	8.2968	0	8.27352	0	10.2251	0	7.16964	0	8.33226	0	0	0	0	8.27764	0	9.26142	0	0	8.46863	0	7.5835	0	9.21929	0	0
C4b-binding protein beta chain	C4BPB	0	8.07844	7.42062	9.31576	11.3204	9.82745	9.63121	0	0	7.76331	10.2233	11.5098	0	10.3378	0	9.79515	7.0889	0	9.07175	7.32606	0	8.6674	9.75439	10.2805	0	0	0	9.20002	8.18354	7.81115	9.49206	10.1655	0	9.09329	8.92082	0	9.48018	0	0	0	0	9.87861	0	10.6501	8.11492	0	7.7282	0
Uncharacterized protein KIAA1755	KIAA1755	0	0	0	0	0	0	0	0	0	0	0	0	0	0	0	0	0	9.04487	0	0	0	0	0	0	0	0	0	0	0	0	0	0	0	7.81058	0	7.89665	7.21905	0	0	0	0	0	0	0	7.36324	8.78839	0	0
Solute carrier family 66 member 3 (PQ-loop repeat-containing protein 3)	SLC66A3	0	0	8.43033	8.39101	0	8.54963	0	0	0	0	0	0	11.129	0	0	0	0	0	9.13483	0	0	0	9.74822	9.19146	0	0	8.56076	10.7786	0	0	0	9.43397	0	8.76658	0	8.7748	9.88488	0	0	0	0	0	0	0	0	0	0	0
Protein argonaute-3 (Argonaute3) (hAgo3) (EC 3.1.26.n2) (Argonaute RISC catalytic component 3) (Eukaryotic translation initiation factor 2C 3) (eIF-2C 3) (eIF2C 3)	AGO3	7.6125	0	0	0	0	0	10.3333	0	10.4095	0	8.04308	0	0	0	10.56	7.77565	8.70688	8.84689	0	0	6.42933	0	0	6.91919	0	0	8.51996	0	0	0	0	0	8.35607	0	0	0	0	0	0	0	0	0	8.77407	0	8.48762	9.15714	7.50828	0
Leucine-rich repeat and WD repeat-containing protein 1 (Centromere protein 33) (CENP-33) (Origin recognition complex-associated protein) (ORC-associated protein) (ORCA)	LRWD1	0	0	0	0	0	0	0	0	0	0	0	0	0	0	11.5713	0	0	0	0	0	0	0	0	0	0	0	0	0	0	0	0	0	0	0	0	0	0	0	0	0	0	0	0	0	8.16061	8.69758	0	0
Delta(24)-sterol reductase (EC 1.3.1.72) (24-dehydrocholesterol reductase) (3-beta-hydroxysterol Delta-24-reductase) (Diminuto/dwarf1 homolog) (Seladin-1)	DHCR24	0	0	0	0	0	0	0	0	0	0	0	0	0	0	9.91985	0	0	9.24922	11.0401	0	0	0	0	0	0	0	0	0	10.0259	0	0	0	8.82602	0	0	0	0	0	9.5087	0	0	0	9.3542	0	0	0	0	0
Zinc finger CCCH domain-containing protein 13	ZC3H13	0	0	0	0	0	0	0	0	0	0	0	0	0	0	0	0	0	0	0	0	8.39883	0	0	0	0	0	0	9.22311	7.37812	0	0	0	0	0	0	0	6.8786	9.04566	0	0	0	0	0	0	0	0	0	0
Vacuolar fusion protein MON1 homolog B (HSV-1 stimulation-related gene 1 protein) (HSV-I stimulating-related protein)	MON1B	0	0	0	0	0	0	0	0	0	0	0	0	0	0	0	0	0	0	0	0	0	0	0	0	0	0	0	0	0	0	0	0	0	0	0	0	0	0	0	0	0	0	0	0	0	0	0	0
Lipolysis-stimulated lipoprotein receptor (Angulin-1)	LSR	9.72864	0	0	0	0	0	0	9.84522	0	0	0	7.2474	9.89964	0	0	9.92825	0	10.2256	0	10.032	0	0	0	0	9.41674	0	9.5077	9.87688	9.68178	0	0	0	9.69892	0	0	0	0	8.88647	10.2673	9.25753	0	0	9.84228	0	10.5815	10.5327	0	11.064
Cell cycle progression protein 1 (Cell cycle progression restoration protein 8)	CCPG1	0	0	0	0	0	0	0	0	0	8.60198	0	0	0	0	0	0	0	0	0	0	0	9.47222	0	0	0	9.50116	0	0	0	7.64435	0	0	9.9754	8.47815	7.88493	0	7.74484	0	0	0	0	0	0	0	0	0	0	0
Ran-binding protein 9 (RanBP9) (BPM-L) (BPM90) (Ran-binding protein M) (RanBPM) (RanBP7)	RANBP9	8.90414	8.66803	0	0	0	0	0	8.51798	8.48406	0	8.62284	0	9.06245	0	0	8.84047	9.68688	0	0	0	0	0	0	0	0	0	0	8.76748	8.995	0	0	0	0	0	0	9.50783	0	0	8.57228	0	0	0	0	0	0	9.77771	8.73692	0
Protein-arginine deiminase type-2 (EC 3.5.3.15) (PAD-H19) (Peptidylarginine deiminase II) (Protein-arginine deiminase type II)	PADI2	8.37861	0	0	9.179	8.61156	7.378	0	0	0	9.4645	0	0	0	9.24759	0	9.82186	11.2246	0	8.96383	0	0	8.58598	0	8.54485	0	0	0	12.1052	8.95544	0	0	8.83517	9.58034	13.6929	9.4116	0	0	0	9.93026	8.69508	0	10.3747	9.26417	0	0	8.51155	8.13629	9.18759
Integrator complex subunit 2 (Int2)	INTS2	0	0	0	0	0	0	0	0	0	0	0	0	0	0	0	0	0	0	0	0	0	0	0	0	0	0	0	0	0	0	0	0	0	0	0	7.80886	0	0	0	7.36142	0	0	0	0	0	0	0	0
Ubiquitin/ISG15-conjugating enzyme E2 L6 (EC 2.3.2.23) (E2 ubiquitin-conjugating enzyme L6) (Retinoic acid-induced gene B protein) (RIG-B) (UbcH8) (Ubiquitin carrier protein L6) (Ubiquitin-protein ligase L6)	UBE2L6	0	0	0	0	0	0	0	0	0	0	0	0	0	0	0	0	0	0	0	0	0	0	0	0	0	0	0	0	0	0	0	0	0	7.30534	0	0	0	0	0	0	9.33409	0	0	0	0	0	0	9.42449
Trafficking protein particle complex subunit 2 (Sedlin)	TRAPPC2	0	0	0	0	0	0	0	0	0	0	0	0	0	8.69369	0	0	0	0	0	0	0	0	0	0	0	0	0	0	0	0	0	8.5761	0	9.1431	0	0	0	0	0	0	0	0	0	0	0	0	0	0
Dedicator of cytokinesis protein 8	DOCK8	0	0	0	0	0	0	0	0	0	0	0	0	0	0	0	0	0	0	0	0	6.49074	0	0	0	0	0	0	0	0	0	0	7.13208	0	0	8.81752	0	0	0	0	0	0	0	0	0	8.24836	0	0	0
Uncharacterized protein KIAA0513	KIAA0513	8.60424	0	0	0	0	0	0	0	0	0	0	0	0	0	0	0	10.5679	0	0	0	0	9.63537	0	0	0	0	0	10.93	0	0	0	0	0	0	0	0	0	0	9.86064	0	0	8.94336	0	0	0	0	0	0
Rho guanine nucleotide exchange factor 28 (190 kDa guanine nucleotide exchange factor) (p190-RhoGEF) (p190RhoGEF) (Rho guanine nucleotide exchange factor)	ARHGEF28	0	0	0	0	0	0	0	0	0	0	0	0	0	0	0	0	0	0	0	0	0	0	0	0	0	0	0	0	0	0	0	0	0	0	0	0	0	0	0	0	0	0	0	0	0	0	0	0
Sigma intracellular receptor 2 (S2R) (Sigma-2 receptor) (Sigma2 receptor) (Meningioma-associated protein 30) (MAC30) (Transmembrane protein 97)	TMEM97	0	0	0	0	0	0	0	0	0	9.2708	0	0	0	0	0	0	0	0	0	0	0	0	0	8.73116	0	0	0	0	0	0	0	0	0	0	0	0	0	0	9.8244	0	0	8.81318	0	0	0	0	0	9.1985
Keratin, type I cytoskeletal 16 (Cytokeratin-16) (CK-16) (Keratin-16) (K16)	KRT16	0	0	0	8.48194	8.82724	0	6.95485	0	0	8.81287	0	9.627	0	0	0	0	0	10.5037	8.37202	0	8.15118	8.57949	7.89253	0	7.55443	8.77215	9.10749	0	0	0	0	0	0	0	8.17377	0	0	7.72315	9.19201	0	9.19098	9.41698	0	7.84349	0	8.54409	0	0
PRKCA-binding protein (Protein interacting with C kinase 1) (Protein kinase C-alpha-binding protein)	PICK1	0	0	0	0	0	0	0	0	0	0	0	0	0	0	0	0	0	0	0	0	0	0	0	0	0	0	0	0	0	0	0	0	0	0	0	0	0	0	0	0	0	0	0	0	0	0	0	0
Cyclin-Y-like protein 1	CCNYL1	0	0	0	0	0	0	0	0	10.4263	0	0	0	9.92775	0	0	0	0	0	0	0	0	0	0	0	0	0	0	0	0	0	0	0	0	0	0	0	0	0	0	0	0	0	0	0	8.84823	0	0	0
CUE domain-containing protein 1	CUEDC1	0	0	0	0	0	9.23463	0	0	0	9.72231	0	0	0	0	0	0	7.44382	9.80532	0	8.40186	0	0	0	0	0	0	8.65643	0	8.58098	0	0	0	0	0	0	0	6.27399	10.4722	10.463	0	0	0	9.21246	0	10.0096	8.69805	0	0
5-formyltetrahydrofolate cyclo-ligase (EC 6.3.3.2) (5,10-methenyl-tetrahydrofolate synthetase) (MTHFS) (Methenyl-THF synthetase)	MTHFS	0	0	0	0	0	0	0	0	0	0	0	0	0	0	0	0	0	0	0	0	0	0	0	0	0	9.24986	0	0	0	0	0	0	0	0	0	0	0	0	0	0	0	0	0	0	0	0	0	0
NEDD4-binding protein 1 (N4BP1) (EC 3.1.-.-)	N4BP1	0	0	0	0	0	0	0	0	0	0	0	0	0	0	0	0	0	0	7.84332	7.48606	0	0	0	0	0	0	0	0	0	0	0	0	0	0	0	0	0	0	0	0	8.40372	0	0	0	0	0	0	0
Survival motor neuron protein (Component of gems 1) (Gemin-1)	SMN1	0	0	0	0	0	0	0	0	0	0	0	0	0	0	0	0	0	0	0	6.36899	0	0	0	0	0	0	0	0	0	0	0	0	0	8.71565	0	0	0	0	0	0	0	0	0	0	0	0	0	0
Mitogen-activated protein kinase kinase kinase 6 (EC 2.7.11.25) (Apoptosis signal-regulating kinase 2)	MAP3K6	0	0	0	0	0	0	0	0	0	0	0	0	0	0	0	0	0	0	0	0	0	0	0	0	0	0	0	0	0	0	8.01859	0	0	0	0	0	8.62272	8.74428	8.55941	7.19445	9.21027	9.24638	0	9.02958	0	0	0	0
Mitogen-activated protein kinase 7 (MAP kinase 7) (MAPK 7) (EC 2.7.11.24) (Big MAP kinase 1) (BMK-1) (Extracellular signal-regulated kinase 5) (ERK-5)	MAPK7	0	0	0	0	0	0	0	0	0	0	0	0	0	0	0	0	0	0	0	0	0	0	0	0	0	0	0	0	0	0	7.59403	7.98391	0	0	0	0	0	9.42943	0	0	0	0	0	0	0	0	0	0
Nectin-3 (CDw113) (Nectin cell adhesion molecule 3) (Poliovirus receptor-related protein 3) (CD antigen CD113)	NECTIN3	0	0	0	0	0	0	0	0	0	0	9.78356	0	0	0	0	0	8.31738	0	0	0	0	0	0	0	0	12.1384	0	0	8.26853	0	0	0	0	0	0	0	0	0	0	0	0	0	0	0	0	0	0	0
Peptidyl-prolyl cis-trans isomerase NIMA-interacting 4 (EC 5.2.1.8) (Parvulin-14) (Par14) (hPar14) (Parvulin-17) (Par17) (hPar17) (Peptidyl-prolyl cis-trans isomerase Pin4) (PPIase Pin4) (Peptidyl-prolyl cis/trans isomerase EPVH) (hEPVH) (Rotamase Pin4)	PIN4	0	8.48818	0	0	0	0	0	8.25782	7.4924	0	7.60606	0	7.95828	0	8.41203	7.92756	10.2282	7.86283	0	0	0	0	0	0	0	7.46736	8.99205	8.43743	8.69152	0	0	0	7.57267	0	0	8.00232	0	0	8.17735	7.16722	7.17147	0	8.34455	0	7.71229	11.2463	7.80664	7.58567
Histone acetyltransferase KAT7 (EC 2.3.1.48) (Histone acetyltransferase binding to ORC1) (Lysine acetyltransferase 7) (MOZ, YBF2/SAS3, SAS2 and TIP60 protein 2) (MYST-2)	KAT7	0	0	0	0	0	0	0	0	0	0	0	0	0	0	0	0	0	9.13791	0	7.76981	8.87688	0	7.51495	0	0	0	0	0	9.12262	0	0	0	8.05025	0	0	0	7.86086	9.38899	10.1331	8.99948	0	0	0	0	0	8.95921	0	0
Plexin-A1 (Semaphorin receptor NOV)	PLXNA1	0	0	0	6.84041	0	7.64438	0	0	10.2346	0	0	0	10.8395	0	0	0	10.7678	0	0	0	0	0	9.10424	0	0	0	0	10.7399	0	0	7.94073	7.96884	0	8.3935	7.10457	8.30196	7.20615	0	0	0	9.02188	0	0	7.90143	0	0	0	0
Olfactomedin-4 (OLM4) (Antiapoptotic protein GW112) (G-CSF-stimulated clone 1 protein) (hGC-1) (hOLfD)	OLFM4	0	0	0	8.87121	9.86527	9.79661	0	0	0	0	0	8.8881	0	10.9864	0	0	8.42605	0	0	9.25997	0	9.0068	0	0	0	0	0	0	0	0	0	9.35203	0	0	9.54806	0	9.18202	0	0	0	0	9.40002	0	8.66666	0	0	0	7.59516
NHL repeat-containing protein 3	NHLRC3	0	0	0	7.45105	0	0	0	0	0	0	0	6.07444	0	0	0	0	0	0	0	8.78596	0	8.43004	0	0	8.89742	9.10067	0	0	0	0	0	0	0	0	7.46249	8.60465	0	8.09324	8.53001	0	8.4709	0	0	0	0	0	0	8.81884
Exportin-6 (Exp6) (Ran-binding protein 20)	XPO6	8.58282	0	0	0	0	0	0	0	0	0	0	0	0	0	0	0	0	0	0	0	0	0	0	0	0	0	0	0	0	8.93571	0	0	0	7.25839	0	0	0	0	0	0	0	0	0	0	0	0	0	0
Somatomedin-B and thrombospondin type-1 domain-containing protein (RPE-spondin)	SBSPON	0	0	6.76945	0	0	0	0	0	9.34479	0	9.34411	0	10.947	0	0	0	0	7.2748	6.61335	0	0	0	0	0	0	0	9.05624	0	0	0	0	0	0	0	6.8178	8.08885	6.91323	0	0	8.50174	8.71158	8.79719	0	7.19962	0	8.60724	7.49184	0
WW domain-binding protein 2 (WBP-2)	WBP2	0	0	9.80247	9.46141	11.2614	0	0	0	0	0	9.73277	11.3832	0	11.051	0	8.83368	9.32196	0	8.96177	9.26612	0	10.2454	10.2146	10.3232	0	0	0	11.1219	0	8.80404	10.1336	10.7727	0	9.74868	9.55915	0	0	0	0	9.254	10.2113	0	0	10.6368	0	8.62164	0	12.9979
Stromal interaction molecule 2	STIM2	0	0	0	0	0	0	0	0	0	0	9.73389	0	0	0	0	0	0	0	0	8.11931	0	0	0	0	0	0	0	0	9.27549	0	0	0	8.88452	0	7.63316	0	8.79541	10.19	9.97389	0	0	0	8.23825	0	0	8.23496	0	0
V-type proton ATPase subunit F (V-ATPase subunit F) (V-ATPase 14 kDa subunit) (Vacuolar proton pump subunit F)	ATP6V1F	7.70145	0	0	0	0	0	0	0	0	0	8.39611	0	0	0	0	8.04634	13.423	0	0	0	0	0	0	0	0	0	11.4636	0	0	0	0	0	11.3984	0	0	0	0	0	8.16874	0	8.27165	0	0	0	0	0	0	7.75554
Tubulin polymerization-promoting protein (TPPP) (EC 3.6.5.-) (25 kDa brain-specific protein) (TPPP/p25) (p24) (p25-alpha)	TPPP	8.00037	0	0	8.39694	0	0	0	0	0	0	0	0	0	0	0	7.76888	13.536	8.98349	7.98462	0	0	8.45484	0	9.21868	0	0	8.64238	10.8387	9.65645	0	0	8.52925	8.66983	0	0	0	0	0	9.2342	0	0	0	8.68392	0	0	9.15372	0	8.9308
tRNA (guanine-N(7)-)-methyltransferase non-catalytic subunit WDR4 (Protein Wuho homolog) (hWH) (WD repeat-containing protein 4)	WDR4	0	0	0	0	0	0	0	0	0	0	0	0	0	0	0	0	0	0	0	6.65313	0	0	0	0	0	0	0	0	0	6.66746	0	0	0	0	0	0	0	0	0	0	0	0	0	0	0	0	0	0
Probable N-acetyltransferase 14 (EC 2.3.1.-) (K562 cell-derived leucine-zipper-like protein 1)	NAT14	0	0	0	0	0	0	0	0	0	0	0	0	0	0	12.9487	0	8.06457	0	0	0	0	0	0	0	0	0	8.71809	0	7.70301	8.03732	0	0	0	0	0	7.5932	0	0	0	0	0	0	0	0	7.99432	7.37218	0	0
Cationic amino acid transporter 2 (CAT-2) (CAT2) (Low affinity cationic amino acid transporter 2) (Solute carrier family 7 member 2)	SLC7A2	0	10.4222	0	0	0	0	0	0	10.7526	10.8244	0	8.23117	0	0	0	0	0	9.75577	0	0	10.5217	10.0844	0	8.12141	0	10.0285	0	0	0	8.53216	0	0	10.672	0	8.70121	10.2621	0	10.3009	10.6879	10.0447	0	10.465	0	10.1031	10.6738	0	0	10.5039
Proton-coupled zinc antiporter SLC30A5 (Solute carrier family 30 member 5) (Zinc transporter 5) (ZnT-5) (ZnT-like transporter 1) (hZTL1)	SLC30A5	0	0	0	0	0	8.20305	0	0	0	10.0227	0	0	0	0	0	0	0	0	0	7.42931	0	0	0	0	0	9.36021	0	0	0	6.28173	0	6.83483	0	0	8.16361	0	0	8.53848	0	0	0	0	0	0	0	0	0	0
WD repeat domain phosphoinositide-interacting protein 3 (WIPI-3) (WD repeat-containing protein 45-like) (WDR45-like protein) (WD repeat-containing protein 45B) (WIPI49-like protein)	WDR45B	0	0	0	0	0	0	0	0	0	0	0	7.56215	0	0	0	0	0	0	8.66853	0	0	8.81574	8.59801	8.70894	9.94861	9.92198	0	0	0	0	0	8.5296	0	0	7.84333	0	0	9.07829	9.11427	0	9.30405	9.29179	0	9.68623	0	0	0	0
TNF receptor-associated factor 2 (EC 2.3.2.27) (E3 ubiquitin-protein ligase TRAF2) (RING-type E3 ubiquitin transferase TRAF2) (Tumor necrosis factor type 2 receptor-associated protein 3)	TRAF2	0	0	0	0	0	0	0	0	0	0	0	0	0	0	0	0	0	0	0	0	0	0	0	0	0	0	0	0	0	8.30863	7.60105	0	0	8.29283	0	7.42085	0	0	0	0	0	0	0	0	0	0	8.47288	0
Keratin, type II cytoskeletal 8 (Cytokeratin-8) (CK-8) (Keratin-8) (K8) (Type-II keratin Kb8)	KRT8	0	0	0	0	0	0	7.50747	10.002	0	9.51967	9.23114	0	0	0	0	0	8.65877	9.71161	0	0	7.06376	0	0	0	0	9.09069	8.34119	0	0	0	0	0	0	7.70257	0	0	0	7.85677	8.68007	5.92364	0	8.64621	0	0	10.0118	9.25177	7.09584	7.331
Teneurin-3 (Ten-3) (Protein Odd Oz/ten-m homolog 3) (Tenascin-M3) (Ten-m3) (Teneurin transmembrane protein 3)	TENM3	0	0	0	0	0	8.26737	0	0	0	9.42304	0	0	0	0	0	0	0	0	0	0	0	0	0	0	9.61185	0	0	0	0	8.20005	0	0	0	0	0	0	0	8.70508	0	0	8.84418	8.99325	0	8.44375	0	0	0	0
DNA-directed RNA polymerase I subunit RPA34 (A34.5) (Antisense to ERCC-1 protein) (ASE-1) (CD3-epsilon-associated protein) (CD3E-associated protein) (DNA-directed RNA polymerase I subunit G) (RNA polymerase I-associated factor PAF49)	POLR1G	0	0	0	0	0	0	0	10.8873	0	0	0	0	0	0	10.2206	0	0	0	0	0	8.43271	0	0	0	0	0	0	0	0	0	0	0	8.43565	0	0	10.1904	0	0	0	8.51415	0	0	0	0	0	7.90655	0	0
NFX1-type zinc finger-containing protein 1	ZNFX1	0	0	0	0	0	0	0	0	0	0	0	0	0	0	0	0	0	0	0	0	7.71465	0	0	0	0	0	0	0	0	0	7.87094	0	0	7.43281	0	0	0	0	0	0	0	0	0	0	7.98602	0	0	0
Migration and invasion enhancer 1 (HBV X-transactivated gene 4 protein) (HBV XAg-transactivated protein 4) (Protein C35)	MIEN1	0	0	0	0	9.59418	0	0	0	0	0	9.88946	0	0	8.83397	0	9.63002	10.108	0	0	0	0	0	0	0	9.54884	0	0	0	8.45622	0	0	7.87265	10.3377	0	0	8.69301	0	0	0	8.96783	9.51862	0	7.69604	0	0	0	9.03128	11.5003
Protein kish-A (Transmembrane protein 167) (Transmembrane protein 167A)	TMEM167A	0	0	10.2414	10.8428	11.3146	12.334	0	10.2792	11.2437	11.2672	0	10.8294	11.2338	11.1691	11.2483	0	0	0	11.1629	10.307	12.346	0	10.3063	10.0099	14.293	10.2427	11.5568	10.9939	10.2561	11.1886	11.6736	11.0781	0	10.7694	11.7928	11.1238	0	12.6667	12.0212	12.5983	11.5614	0	0	11.8271	0	0	0	10.5838
Myelin protein zero-like protein 2 (Epithelial V-like antigen 1)	MPZL2	0	0	0	0	9.67692	0	0	0	0	11.3091	0	9.90238	0	8.60502	0	0	0	0	0	8.53638	9.68469	11.5369	0	9.45244	10.2648	12.1041	0	0	0	6.72092	0	9.08381	0	0	9.24967	0	9.93181	10.5472	11.2586	10.5474	0	11.4909	0	9.95254	0	0	0	9.92356
Prefoldin subunit 4 (Protein C-1)	PFDN4	0	0	0	0	0	0	0	9.6597	9.46341	0	0	0	9.29954	0	8.4483	8.69652	10.0758	8.17418	0	0	0	0	0	0	0	6.65744	10.5987	8.82107	10.2845	0	0	0	9.15682	0	0	0	0	0	0	0	0	0	8.94292	6.83747	10.0477	9.89977	8.65959	0
Mitochondrial import inner membrane translocase subunit Tim23	TIMM23	0	0	0	0	0	0	0	0	0	0	0	0	0	0	0	0	0	0	9.42697	8.38116	9.37557	0	0	0	0	0	8.85613	0	0	0	0	0	0	0	0	0	0	0	10.3612	0	10.4481	0	0	0	0	0	0	10.3137
Cell division cycle protein 27 homolog (Anaphase-promoting complex subunit 3) (APC3) (CDC27 homolog) (CDC27Hs) (H-NUC)	CDC27	0	0	0	0	0	8.71304	0	11.0252	9.49715	0	0	0	0	0	0	0	0	0	0	11.8897	10.0599	0	0	0	9.02015	0	0	0	0	0	0	0	0	0	0	10.727	0	0	10.5704	0	10.0614	0	0	9.11862	0	10.5939	0	0
Alpha-mannosidase 2x (EC 3.2.1.114) (Alpha-mannosidase IIx) (Man IIx) (Mannosidase alpha class 2A member 2) (Mannosyl-oligosaccharide 1,3-1,6-alpha-mannosidase)	MAN2A2	0	0	0	0	9.00794	0	0	0	0	0	0	7.56245	8.97331	0	0	0	0	0	0	7.8536	0	0	0	0	0	9.61266	0	0	0	8.09328	0	8.28111	0	0	0	9.64812	9.26344	9.21084	0	7.99094	0	9.20413	0	8.53606	0	0	0	0
Androgen-induced gene 1 protein (AIG-1) (Fatty acid esters of hydroxy fatty acids hydrolase AIG1) (FAHFA hydrolase AIG1) (EC 3.1.-.-)	AIG1	0	0	0	0	0	0	0	0	0	0	0	0	0	5.90764	0	0	7.14886	0	0	10.4341	14.6356	0	0	8.67935	10.6802	0	7.1794	0	0	0	7.99862	0	0	0	10.3666	0	7.33445	0	0	15.1926	0	0	0	0	0	6.57784	0	0
Mevalonate kinase (MK) (EC 2.7.1.36)	MVK	0	0	0	0	0	0	0	0	0	0	0	7.53719	0	0	0	0	8.05383	0	0	0	0	0	0	0	0	10.0262	0	0	0	0	0	0	0	0	0	8.97518	0	0	0	0	0	0	0	0	0	0	0	0
Pyruvate kinase PKLR (EC 2.7.1.40) (Pyruvate kinase 1) (Pyruvate kinase isozymes L/R) (R-type/L-type pyruvate kinase) (Red cell/liver pyruvate kinase)	PKLR	0	0	9.4996	10.1147	11.0958	10.2079	9.24531	0	0	7.70862	0	12.0183	0	11.3084	0	0	0	0	9.82104	8.27751	0	9.14363	10.4641	10.4084	10.2117	6.66158	0	8.78955	0	7.99454	9.47725	10.1032	0	9.53293	9.01631	0	9.27448	7.57293	7.67177	0	7.639	8.9633	0	9.35976	8.17695	0	7.63851	0
VPS10 domain-containing receptor SorCS2 [Cleaved into: SorCS2 122 kDa chain; SorCS2 104 kDa chain; SorCS2 18 kDa chain]	SORCS2	0	0	0	0	0	7.22815	8.19769	0	0	9.72196	8.46839	0	0	0	0	0	7.01263	0	7.29228	0	0	0	0	0	8.76912	8.2253	8.69519	0	0	7.52417	0	0	8.89456	0	8.06297	0	0	0	0	0	8.44914	0	8.28701	0	0	0	7.85554	0
Nuclear pore complex protein Nup50 (50 kDa nucleoporin) (Nuclear pore-associated protein 60 kDa-like) (Nucleoporin Nup50)	NUP50	0	0	0	0	0	0	0	0	0	0	8.12302	0	0	0	0	8.94255	8.46714	0	0	0	0	0	0	0	0	0	8.30869	0	0	0	0	0	8.92415	0	0	9.00164	0	0	0	0	0	0	9.39847	0	0	0	0	9.29643
Amine oxidase [copper-containing] 3 (EC 1.4.3.21) (Amine oxidase copper-containing 3) (Copper amine oxidase) (HPAO) (Semicarbazide-sensitive amine oxidase) (SSAO) (Vascular adhesion protein 1) (VAP-1)	AOC3	0	0	12.8354	9.98506	11.7954	11.6174	11.6593	0	0	10.5777	0	0	0	13.0265	0	11.1762	9.55112	0	12.3662	9.73577	0	0	13.6957	12.1961	10.5123	0	0	0	8.86072	11.5533	13.8795	13.3834	0	11.1416	0	8.52992	11.5762	11.3473	0	11.3294	10.2954	11.2309	0	13.4725	9.33753	9.39336	0	0
Lysocardiolipin acyltransferase 1 (EC 2.3.1.-) (1-acylglycerol-3-phosphate O-acyltransferase 8) (1-AGP acyltransferase 8) (1-AGPAT 8) (EC 2.3.1.51) (Acyl-CoA:lysocardiolipin acyltransferase 1)	LCLAT1	0	0	0	0	0	0	9.10959	0	10.8262	10.1445	0	7.86277	10.6328	0	10.7308	0	9.9577	0	0	7.832	0	0	0	0	10.1339	0	8.74566	0	10.5771	9.18829	0	0	9.9674	0	8.3158	9.90435	9.37307	10.4293	9.84275	0	0	9.74173	10.2238	0	10.1027	9.66071	0	0
C-type lectin domain family 14 member A (Epidermal growth factor receptor 5) (EGFR-5)	CLEC14A	0	0	0	0	0	0	0	0	0	12.9262	0	0	0	0	0	0	0	0	8.97215	9.80644	0	0	8.33276	0	0	0	0	0	0	0	8.02237	8.7053	0	0	0	0	10.041	0	0	0	0	0	0	11.9451	0	0	0	0
Protein CLN8	CLN8	0	0	0	0	0	0	0	0	7.92456	0	0	0	8.50957	0	0	0	0	0	0	0	0	0	0	0	0	8.83678	0	7.8893	0	0	0	0	0	0	0	0	0	0	0	0	8.35026	0	0	0	0	0	0	0
Exosome complex component RRP42 (Exosome component 7) (Ribosomal RNA-processing protein 42) (p8)	EXOSC7	0	0	0	0	0	0	0	0	0	0	0	0	0	0	0	0	0	0	0	0	0	0	0	0	8.84323	8.84039	0	0	0	0	0	0	0	0	0	0	0	0	8.73506	0	8.51852	8.74639	0	0	0	0	0	0
Long-chain specific acyl-CoA dehydrogenase, mitochondrial (LCAD) (EC 1.3.8.8)	ACADL	10.24	10.6604	8.03074	0	8.55089	0	0	11.0542	0	10.3082	9.83967	0	8.23252	0	0	9.44358	0	11.0891	0	0	8.33361	10.1706	7.92223	7.42345	8.29339	7.90429	7.91922	9.67999	10.0652	7.81882	6.50849	0	9.75876	0	0	8.49807	8.49507	0	11.7424	7.69467	8.57086	10.298	8.36659	9.14523	11.8591	11.1831	9.59915	10.834
Cysteine-rich and transmembrane domain-containing protein 1	CYSTM1	0	0	0	0	0	8.47167	9.31739	0	0	10.0427	0	9.95483	0	10.0334	0	0	0	0	8.53657	8.65886	9.33589	10.6924	0	8.35418	0	10.9421	0	0	0	8.71622	8.50292	0	0	0	7.75684	0	0	0	0	0	0	0	0	9.70885	0	0	0	0
T-cell surface glycoprotein CD4 (T-cell surface antigen T4/Leu-3) (CD antigen CD4)	CD4	0	0	0	0	0	0	0	0	0	0	0	0	0	0	0	0	0	0	0	0	0	0	0	0	0	0	0	0	0	0	0	0	0	0	9.04188	0	0	9.34656	0	10.0491	0	0	0	0	0	0	0	0
Zinc finger protein 384 (CAG repeat protein 1) (CAS-interacting zinc finger protein) (Nuclear matrix transcription factor 4) (Nuclear matrix protein 4) (Trinucleotide repeat-containing gene 1 protein)	ZNF384	0	9.42327	0	0	0	0	0	8.82365	8.94878	8.69701	9.13604	8.86375	0	0	9.83529	9.15293	0	8.65606	0	0	8.46838	0	0	0	8.90828	0	0	8.97263	8.76747	0	0	0	8.88838	7.12736	0	9.2998	0	0	0	8.17034	8.14978	9.01783	9.48406	7.99407	9.75789	7.31819	8.67929	0
Chondroitin sulfate synthase 3 (EC 2.4.1.175) (EC 2.4.1.226) (Carbohydrate synthase 2) (Chondroitin glucuronyltransferase 3) (Chondroitin synthase 2) (ChSy-2) (Glucuronosyl-N-acetylgalactosaminyl-proteoglycan 4-beta-N-acetylgalactosaminyltransferase II) (N-acetylgalactosaminyl-proteoglycan 3-beta-glucuronosyltransferase 3) (N-acetylgalactosaminyltransferase 3)	CHSY3	0	0	0	0	0	0	0	0	0	0	0	0	0	0	0	0	0	0	0	0	0	0	0	0	0	0	0	0	0	0	0	0	0	0	0	0	0	0	0	0	0	0	0	0	0	0	0	0
von Willebrand factor A domain-containing protein 8 (PEX7-binding protein 2) (P7BP2)	VWA8	0	0	0	0	0	0	0	0	0	0	0	0	0	0	0	9.1839	0	0	0	0	0	0	0	0	0	0	0	0	0	8.01404	0	0	0	0	0	0	0	0	0	0	0	0	0	0	0	0	0	0
Serine/threonine-protein kinase D2 (EC 2.7.11.13) (nPKC-D2)	PRKD2	0	0	7.15818	0	0	9.66569	7.90885	0	0	0	0	0	0	0	0	0	0	0	0	7.71118	0	0	7.67479	0	0	0	0	0	0	0	7.41632	7.8459	0	0	7.51481	0	7.7861	8.04726	0	0	8.04249	7.9133	0	8.31957	0	0	0	0
Neutrophil gelatinase-associated lipocalin (NGAL) (25 kDa alpha-2-microglobulin-related subunit of MMP-9) (Lipocalin-2) (Oncogene 24p3) (Siderocalin) (p25)	LCN2	0	9.99531	9.34897	10.0514	9.10609	10.4261	7.65357	0	0	0	8.76638	9.38089	0	10.4757	0	10.4778	9.48796	11.7274	8.94524	8.67005	0	0	7.48227	8.27059	0	7.55503	0	10.4062	8.17544	7.55821	8.57815	9.44567	7.10993	8.36622	9.05079	7.88196	10.2247	0	0	0	7.88348	8.93149	7.61057	9.11544	11.4387	11.6009	6.7446	8.00233
Vitamin K-dependent protein C (EC 3.4.21.69) (Anticoagulant protein C) (Autoprothrombin IIA) (Blood coagulation factor XIV) [Cleaved into: Vitamin K-dependent protein C light chain; Vitamin K-dependent protein C heavy chain; Activation peptide]	PROC	0	0	8.54205	0	10.276	10.0903	9.54386	0	0	0	0	9.24706	0	8.91498	0	0	0	0	9.9892	0	0	0	9.94314	9.1032	0	0	0	0	0	9.20988	8.89732	8.7002	0	9.03136	7.78992	0	9.96186	0	8.56485	0	0	8.75032	0	8.46145	0	0	0	0
Translation machinery-associated protein 16	TMA16	9.65617	9.43805	0	0	0	0	0	9.21225	10.1946	0	8.65071	0	9.0927	0	9.66114	8.66614	0	0	0	0	8.3911	0	0	0	0	0	9.49891	9.53346	0	0	0	0	8.36453	0	0	9.1885	0	0	10.0844	0	0	0	8.74516	0	9.36287	0	8.9237	9.16405
Semaphorin-3B (Sema A(V)) (Semaphorin-V) (Sema V)	SEMA3B	0	0	9.94298	0	0	10.5127	0	0	0	10.2652	0	0	0	0	0	0	0	0	9.40575	0	0	10.0534	0	9.89215	0	0	0	0	0	0	0	0	0	0	9.37187	0	0	0	10.5329	9.09058	0	0	0	0	0	0	0	0
Dolichol-phosphate mannosyltransferase subunit 3 (Dolichol-phosphate mannose synthase subunit 3) (DPM synthase subunit 3) (Dolichyl-phosphate beta-D-mannosyltransferase subunit 3) (Mannose-P-dolichol synthase subunit 3) (MPD synthase subunit 3) (Prostin-1)	DPM3	0	0	0	0	0	0	0	0	0	0	0	0	0	0	0	0	0	0	0	8.6017	8.05583	0	0	0	0	0	0	0	0	0	0	0	0	0	0	0	0	0	0	0	0	0	0	0	0	0	0	0
Reticulophagy regulator 1 (Reticulophagy receptor 1)	RETREG1	0	0	0	0	0	0	0	0	9.27437	10.0129	0	0	8.35611	0	0	0	9.41569	0	0	8.22689	0	0	0	0	0	0	0	0	7.75169	0	0	0	0	0	0	9.11182	0	10.2064	0	0	0	9.19158	0	0	0	0	9.95712	0
Epiplakin (450 kDa epidermal antigen)	EPPK1	0	0	0	0	7.62859	0	0	0	0	0	0	0	0	7.20107	0	0	0	7.68027	0	0	0	9.32339	0	0	0	7.71908	0	8.23052	0	6.36963	0	0	8.49164	0	0	7.62456	0	0	9.57083	8.03117	0	8.22588	8.10001	7.48647	8.6754	9.21321	9.37333	8.62198
NADH dehydrogenase [ubiquinone] 1 beta subcomplex subunit 4 (Complex I-B15) (CI-B15) (NADH-ubiquinone oxidoreductase B15 subunit)	NDUFB4	9.24564	9.99719	0	0	0	0	0	9.50965	8.90257	0	0	0	9.35493	0	9.45969	9.0451	14.508	8.58081	0	0	10.5508	0	0	0	0	7.86122	0	9.53541	0	0	0	0	7.84646	0	9.06057	9.12123	0	0	0	0	0	0	0	0	8.65361	12.6373	0	0
Collagen alpha-1(V) chain	COL5A1	0	0	0	8.67723	10.8735	11.0621	9.21861	0	0	10.5603	0	6.14469	0	11.5164	9.20112	0	0	8.59486	8.16344	0	0	8.58329	8.87028	8.31849	0	0	0	0	0	11.3091	9.60051	8.48272	0	9.33382	9.44915	10.0793	10.0303	0	0	8.13853	0	10.1713	0	9.99407	0	0	0	9.43668
Syntaxin-11	STX11	0	0	0	0	10.0131	0	0	0	0	0	0	0	0	0	0	0	0	0	7.42388	7.417	0	7.31207	0	0	0	6.5064	0	0	0	8.02881	8.89456	9.69655	0	0	8.45208	0	0	6.6022	0	0	7.29633	8.08581	0	7.72721	7.53339	0	0	0
F-box only protein 21	FBXO21	0	0	0	0	0	0	0	10.6584	0	0	0	0	0	0	0	0	0	0	8.65957	8.31909	0	0	0	0	0	0	0	0	8.71484	0	0	0	0	0	0	0	9.50606	0	0	0	0	0	0	0	0	0	0	0
Nuclear pore glycoprotein p62 (62 kDa nucleoporin) (Nucleoporin Nup62)	NUP62	0	0	0	0	0	0	0	0	0	0	0	0	0	0	0	0	0	0	0	0	7.13631	0	0	0	7.41891	7.56361	0	0	0	0	0	0	0	0	0	0	0	0	7.80368	0	0	0	0	0	0	0	0	0
THO complex subunit 1 (Tho1) (Nuclear matrix protein p84) (p84N5) (hTREX84)	THOC1	0	0	0	0	0	0	0	0	0	0	0	0	0	0	0	0	0	0	0	9.25266	0	0	8.90666	0	0	0	0	0	0	7.1902	9.48451	8.69183	0	0	0	0	0	0	0	9.75158	0	0	0	0	0	0	0	0
Liver carboxylesterase 1 (Acyl-coenzyme A:cholesterol acyltransferase) (ACAT) (Brain carboxylesterase hBr1) (Carboxylesterase 1) (CE-1) (hCE-1) (EC 3.1.1.1) (Cholesteryl ester hydrolase) (CEH) (EC 3.1.1.13) (Cocaine carboxylesterase) (Egasyn) (HMSE) (Methylumbelliferyl-acetate deacetylase 1) (EC 3.1.1.56) (Monocyte/macrophage serine esterase) (Retinyl ester hydrolase) (REH) (Serine esterase 1) (T…	CES1	0	8.21749	9.1526	6.59766	8.08842	9.24832	8.75531	0	9.37922	9.13406	0	6.99106	10.0338	7.51158	0	10.1564	6.99433	0	8.96384	0	7.76255	8.82169	11.1663	8.98184	8.82089	0	8.94758	7.71383	9.60235	8.01796	8.62082	8.57675	8.3907	0	7.47238	8.65403	10.896	0	7.32237	8.42888	0	10.2287	7.50502	10.3599	0	0	9.00587	0
G1/S-specific cyclin-D1 (B-cell lymphoma 1 protein) (BCL-1) (BCL-1 oncogene) (PRAD1 oncogene)	CCND1	0	0	0	0	0	0	0	11.0152	10.3038	0	9.61243	0	10.7631	0	0	0	0	7.61909	0	0	0	0	0	0	0	0	9.56682	0	0	0	0	0	8.9425	0	0	9.98088	0	0	0	7.67424	0	0	9.52878	0	9.38389	9.06367	8.15996	0
Pantetheine hydrolase VNN2 (EC 3.5.1.92) (Glycosylphosphatidyl inositol-anchored protein GPI-80) (Protein FOAP-4) (Vascular non-inflammatory molecule 2) (Vanin-2)	VNN2	0	0	9.2528	0	9.68175	0	0	0	0	0	0	0	0	11.0772	0	0	0	0	0	0	0	0	0	8.4291	8.62542	0	0	0	0	7.87689	8.93428	8.96392	0	0	8.45515	0	0	0	0	0	8.66427	8.5694	0	9.62554	0	0	0	0
Rho GTPase-activating protein 6 (Rho-type GTPase-activating protein 6) (Rho-type GTPase-activating protein RhoGAPX-1)	ARHGAP6	0	0	0	0	0	0	0	0	0	0	0	0	0	7.32239	0	0	0	0	0	0	0	0	7.73852	0	0	0	0	0	6.96016	0	0	8.12907	0	0	0	0	6.73636	0	0	0	0	0	0	0	7.4845	6.83253	7.27063	12.4983
Sodium/potassium-transporting ATPase subunit alpha-2 (Na(+)/K(+) ATPase alpha-2 subunit) (EC 7.2.2.13) (Sodium pump subunit alpha-2)	ATP1A2	10.3657	9.52981	7.28109	7.06803	9.00067	6.73472	0	0	9.75159	8.74991	0	0	9.93897	6.89015	0	11.3467	11.4186	0	6.94877	8.37986	10.0632	8.75587	6.98893	8.34904	0	0	0	10.6453	7.63391	8.07388	8.31851	7.78416	8.38431	9.45752	0	8.08421	10.3804	7.52107	8.68897	7.46744	0	10.6245	7.14579	7.92677	0	0	9.11859	9.80962
PAX3- and PAX7-binding protein 1 (GC-rich sequence DNA-binding factor 1)	PAXBP1	0	0	0	0	0	0	0	0	0	0	0	0	0	0	0	0	0	0	0	7.76962	8.90411	0	0	0	0	0	0	0	0	0	0	8.38045	0	9.07448	0	0	8.22042	0	10.5879	0	0	0	0	0	0	0	0	9.91101
Immortalization up-regulated protein (Hepatocyte growth factor activator inhibitor type 2-related small protein) (H2RSP) (HAI-2-related small protein)	IMUP	0	11.7319	8.60853	7.78955	8.9801	11.4904	10.6325	11.6756	0	10.7364	0	8.94431	0	11.1242	0	0	7.8652	9.71328	8.63611	9.31236	10.7916	11.7851	0	9.89332	12.5111	12.9074	9.29204	8.09244	12.1004	10.1804	0	0	11.1815	0	7.10834	10.2335	8.31691	12.6314	11.4632	12.2146	12.5611	10.808	9.94457	12.5655	8.7139	9.58423	11.9275	11.6319
E3 ubiquitin-protein ligase CHIP (EC 2.3.2.27) (Antigen NY-CO-7) (CLL-associated antigen KW-8) (Carboxy terminus of Hsp70-interacting protein) (RING-type E3 ubiquitin transferase CHIP) (STIP1 homology and U box-containing protein 1)	STUB1	9.23806	10.4991	0	0	0	0	0	10.4151	9.63811	0	9.11745	0	9.80546	0	10.0389	9.62344	9.8515	9.87453	0	0	7.77175	0	0	0	8.23489	8.4403	9.21243	10.7851	9.71397	0	0	0	9.4217	7.93286	0	8.59368	0	0	8.17796	5.96239	8.40255	0	8.5143	7.5876	8.94114	10.5215	9.00108	9.14766
Type 2 lactosamine alpha-2,3-sialyltransferase (EC 2.4.99.-) (CMP-NeuAc:beta-galactoside alpha-2,3-sialyltransferase VI) (ST3Gal VI) (ST3GalVI) (Sialyltransferase 10)	ST3GAL6	0	0	0	0	10.8162	0	0	0	0	0	0	0	0	8.13488	0	0	0	0	0	0	0	0	0	0	0	0	0	0	0	0	0	0	0	0	0	0	8.38681	0	0	0	0	0	0	0	0	0	0	0
GPI ethanolamine phosphate transferase 1 (EC 2.-.-.-) (MCD4 homolog) (Phosphatidylinositol-glycan biosynthesis class N protein) (PIG-N)	PIGN	0	0	0	0	0	0	0	0	0	0	0	0	0	0	0	0	0	0	0	0	0	0	7.94749	0	0	0	0	0	0	0	0	0	0	7.68291	0	0	0	0	0	0	0	0	0	0	0	0	0	9.08058
Transmembrane protein 161A (Adaptive response to oxidative stress protein 29) (AROS-29)	TMEM161A	0	0	0	0	0	0	0	0	0	0	0	0	0	0	0	0	0	0	0	0	0	0	0	0	0	0	0	0	0	0	0	0	0	0	0	0	0	10.0436	0	0	0	0	0	0	0	0	0	0
Large ribosomal subunit protein mL66 (39S ribosomal protein S18-3, mitochondrial) (MRP-S18-3) (39S ribosomal protein S18a, mitochondrial) (MRP-S18-a) (Mrps18a) (S18mt-a) (Large ribosomal subunit protein bS18a)	MRPS18A	6.21597	0	0	0	0	0	0	0	0	0	8.20467	0	0	0	0	6.52741	0	0	0	0	10.5865	0	0	0	0	0	7.99282	0	0	0	0	0	8.30618	7.0825	0	8.49963	0	0	0	8.18571	9.28866	0	0	0	8.00558	0	8.1429	0
Heat shock protein beta-6 (HspB6) (Heat shock 20 kDa-like protein p20)	HSPB6	0	0	8.74396	0	0	6.75523	9.55912	0	0	0	0	0	0	10.5149	0	8.03893	0	0	7.8198	0	0	0	7.91623	7.84061	0	0	9.23709	0	0	0	8.14647	7.99562	0	10.6989	0	0	0	0	0	0	10.0536	0	0	10.6924	0	0	0	0
Pannexin-1 (PANX1) [Cleaved into: Caspase-activated pannexin-1 (Caspase-activated PANX1)]	PANX1	0	0	0	8.26041	0	7.8062	0	0	0	0	0	0	0	9.15746	0	0	8.45033	0	0	0	0	0	7.74188	0	0	0	0	0	0	0	0	0	0	9.28287	0	0	0	0	0	0	0	0	0	0	0	0	0	11.2725
DNA replication licensing factor MCM2 (EC 3.6.4.12) (Minichromosome maintenance protein 2 homolog) (Nuclear protein BM28)	MCM2	0	0	0	0	0	0	0	7.40444	0	0	0	7.90293	0	0	0	0	0	0	0	6.73686	8.26351	0	7.83943	0	0	0	0	0	0	8.19694	0	0	0	0	7.05885	8.89821	0	0	8.77135	0	0	0	0	0	0	0	8.02833	0
Synapse-associated protein 1 (BSD domain-containing signal transducer and Akt interactor protein) (BSTA)	SYAP1	0	9.78186	6.90448	0	0	0	0	9.29843	8.65744	0	7.97672	0	8.04942	0	10.2617	8.76266	8.44818	8.678	0	0	0	0	0	0	0	0	9.32049	8.46651	9.38406	0	0	0	8.50473	0	6.25858	8.84419	0	0	8.14077	6.31925	0	0	8.35112	0	8.50978	8.77672	8.77383	8.72379
Inactive ubiquitin carboxyl-terminal hydrolase 53 (Inactive ubiquitin-specific peptidase 53)	USP53	8.40308	0	0	0	0	0	0	9.84498	9.39176	7.34576	0	0	10.324	0	10.2182	0	0	0	0	0	0	0	0	0	0	0	0	0	0	0	0	0	0	0	0	7.99978	0	0	0	6.75074	0	0	8.96873	0	0	0	7.84485	0
Kinesin-like protein KIF21A (Kinesin-like protein KIF2) (Renal carcinoma antigen NY-REN-62)	KIF21A	0	0	0	0	0	0	0	0	0	0	0	0	0	0	0	9.21614	10.7261	0	0	0	0	0	0	0	0	0	0	8.79197	0	0	0	0	0	0	0	0	0	0	9.23001	0	9.90368	0	8.54905	8.77565	8.65133	0	0	9.02073
Transmembrane protein 132C	TMEM132C	0	0	0	0	0	0	0	0	0	0	0	0	0	0	0	0	0	0	0	0	0	0	0	6.90257	0	0	0	0	0	0	0	0	0	0	0	0	0	0	0	7.65906	0	0	0	0	0	0	0	11.1526
T-complex protein 11-like protein 1	TCP11L1	0	0	0	0	0	0	0	0	0	0	0	0	9.20354	0	0	0	0	0	0	0	0	0	7.86812	7.76848	0	0	8.33374	10.1762	0	0	0	0	0	0	0	8.59969	8.50686	0	0	0	8.85591	0	0	0	0	0	0	0
Mediator of DNA damage checkpoint protein 1 (Nuclear factor with BRCT domains 1)	MDC1	6.69072	10.6935	0	0	0	0	0	10.4636	0	0	7.39165	0	0	0	11.0027	0	0	7.58367	0	0	7.02689	0	0	0	0	0	0	0	7.56154	0	0	0	7.75933	0	0	9.03377	0	0	0	0	0	0	7.30151	0	7.96899	10.141	7.0116	11.4466
Ankyrin repeat and KH domain-containing protein 1 (HIV-1 Vpr-binding ankyrin repeat protein) (Multiple ankyrin repeats single KH domain) (hMASK)	ANKHD1	0	0	0	0	0	0	0	0	0	0	0	0	8.88449	0	0	0	0	0	0	0	0	0	0	0	0	0	0	7.8797	0	0	0	0	0	6.36119	8.28326	0	0	0	0	0	0	0	0	0	0	0	7.20095	7.90568
Rapamycin-insensitive companion of mTOR (AVO3 homolog) (hAVO3)	RICTOR	0	0	0	0	0	0	0	0	0	0	0	0	0	0	0	0	0	0	0	0	0	0	7.72199	7.22503	0	0	0	0	0	0	0	8.23683	0	8.52446	0	0	8.00361	0	0	0	0	0	0	0	0	0	0	0
U6 snRNA-associated Sm-like protein LSm6	LSM6	0	10.8524	9.31391	9.09559	0	0	0	0	0	0	10	0	11.369	9.3413	0	0	0	0	8.98405	9.45474	0	0	0	8.74272	0	0	0	0	0	0	0	0	0	0	8.92785	10.8182	9.04615	0	0	9.85588	0	0	0	0	0	10.7566	10.3521	0
Tubulin-specific chaperone A (TCP1-chaperonin cofactor A) (Tubulin-folding cofactor A) (CFA)	TBCA	9.74523	9.6059	0	8.10851	0	0	0	10.3422	8.62001	0	8.99354	0	9.25468	0	9.57563	9.44109	9.21004	8.66679	0	0	7.50238	0	0	0	7.70713	0	9.65414	10.3995	9.09498	0	0	0	8.69521	0	0	8.64713	0	0	0	7.08132	0	0	7.60828	0	8.39088	9.55615	9.04235	8.01388
7SK snRNA methylphosphate capping enzyme (MePCE) (EC 2.1.1.-) (Bicoid-interacting protein 3 homolog) (Bin3 homolog)	MEPCE	0	0	0	0	0	0	0	0	0	0	0	8.69116	0	0	0	0	0	0	0	0	0	0	8.34754	8.26916	0	10.1224	0	0	0	0	0	0	0	0	0	10.1883	0	0	0	0	9.8798	9.59499	10.911	9.62464	0	0	10.3808	0
Nucleolar GTP-binding protein 2 (Autoantigen NGP-1)	GNL2	0	0	0	0	0	0	0	0	0	0	0	0	0	0	0	0	0	0	0	0	11.8078	0	0	0	0	0	0	0	0	0	0	0	0	0	0	0	0	0	0	0	0	0	0	0	0	0	0	0
Probable ATP-dependent RNA helicase DDX52 (EC 3.6.4.13) (ATP-dependent RNA helicase ROK1-like) (DEAD box protein 52)	DDX52	0	0	0	0	0	0	0	0	0	10.6543	0	0	0	8.84195	9.95451	0	0	0	0	0	0	0	0	0	0	11.3795	0	0	0	9.78998	0	0	0	9.14827	0	9.21522	8.22099	0	0	9.86839	0	0	0	0	0	0	0	10.4994
Insulin-like growth factor-binding protein 3 (IBP-3) (IGF-binding protein 3) (IGFBP-3)	IGFBP3	0	0	0	8.16316	8.77909	8.1942	8.67202	0	0	0	0	9.24449	0	0	9.56734	0	0	9.87167	7.43358	0	0	8.45427	0	8.59041	0	0	0	0	0	0	8.29079	8.33679	0	0	0	8.86895	14.6831	0	0	8.81719	0	0	0	0	0	0	0	0
NADH dehydrogenase [ubiquinone] 1 alpha subcomplex subunit 5 (Complex I subunit B13) (Complex I-13kD-B) (CI-13kD-B) (NADH-ubiquinone oxidoreductase 13 kDa-B subunit)	NDUFA5	9.47281	7.64796	7.01925	0	0	0	0	8.59268	8.47942	0	7.40427	0	8.9384	0	9.29601	8.16243	10.6035	8.4137	0	0	0	0	0	0	0	0	0	9.58125	8.75202	0	0	0	7.7579	7.52525	8.68787	9.29486	0	0	0	6.24998	0	0	7.75083	0	8.43849	10.4746	6.59571	6.96144
Glutathione S-transferase C-terminal domain-containing protein	GSTCD	0	0	0	0	0	0	0	0	0	0	0	0	0	0	0	0	0	0	0	0	0	0	0	0	0	0	0	0	0	0	0	0	0	0	0	0	0	0	0	0	0	0	0	0	0	0	0	0
Probable E3 ubiquitin-protein ligase HECTD4 (EC 2.3.2.26) (HECT domain-containing protein 4) (HECT-type E3 ubiquitin transferase HECTD4)	HECTD4	0	0	0	0	0	0	0	0	0	0	0	0	0	0	0	0	0	0	0	7.6866	0	0	0	0	0	0	0	0	0	0	0	0	0	8.02913	7.46165	8.94374	0	8.92071	0	0	0	0	9.23945	10.5427	0	0	0	0
Exosome complex component RRP4 (Exosome component 2) (Ribosomal RNA-processing protein 4)	EXOSC2	0	0	0	0	0	0	0	0	0	0	0	0	0	0	0	0	0	0	0	0	6.53726	0	0	0	0	0	0	0	0	0	0	0	0	0	6.09833	0	0	0	0	0	7.97139	0	0	0	5.82159	0	0	0
Long-chain-fatty-acid--CoA ligase 5 (EC 6.2.1.3) (Arachidonate--CoA ligase) (EC 6.2.1.15) (Long-chain acyl-CoA synthetase 5) (LACS 5)	ACSL5	0	8.95986	8.07	0	8.77924	8.80319	8.92962	8.68201	0	0	0	0	0	7.98802	0	0	8.27241	0	0	7.51797	0	0	0	0	0	0	8.8918	0	0	0	8.12186	7.59988	0	0	8.57473	0	0	8.52894	0	8.31294	0	9.60382	9.7071	8.89144	7.17616	0	0	0
Eyes absent homolog 3 (EC 3.1.3.48)	EYA3	0	0	0	0	0	0	0	0	0	0	0	0	0	0	0	0	0	0	0	0	0	0	0	0	0	0	0	0	0	0	0	0	0	0	0	0	0	9.86814	0	7.01897	0	0	0	0	0	0	0	0
Derlin-1 (Degradation in endoplasmic reticulum protein 1) (DERtrin-1) (Der1-like protein 1)	DERL1	0	0	0	9.69068	0	0	0	0	0	0	0	0	0	10.1387	11.1656	0	10.346	0	0	9.07782	10.5769	0	0	0	10.3771	0	11.0495	0	0	8.06803	0	11.1919	0	10.7783	0	0	11.9676	11.4753	0	0	10.9891	0	0	0	10.6859	0	0	0
Nucleolar protein 14 (Nucleolar complex protein 14)	NOP14	0	0	0	0	0	0	0	0	0	0	0	0	0	0	9.89742	7.36763	0	8.29467	0	0	9.32352	0	0	0	0	0	10.1941	9.98558	0	0	0	0	9.4352	0	0	0	0	0	0	0	0	0	9.00925	0	8.94305	9.77496	8.14807	9.93007
Adenosine deaminase (EC 3.5.4.4) (Adenosine aminohydrolase)	ADA	0	0	0	0	0	0	0	0	9.93776	0	0	0	0	8.72124	8.89831	6.78549	8.34816	0	6.859	0	0	0	6.34736	0	0	0	0	9.1204	7.79467	0	0	7.63468	7.46185	7.45486	7.68185	0	0	0	0	6.40305	0	0	7.93066	0	7.63085	8.38891	7.65154	9.59489
Desmocollin-2 (Cadherin family member 2) (Desmocollin-3) (Desmosomal glycoprotein II) (Desmosomal glycoprotein III)	DSC2	10.7832	0	0	0	0	0	0	0	0	9.21613	8.64755	0	0	7.09403	0	0	0	7.34204	0	8.78139	7.80221	0	0	0	0	0	0	0	0	0	0	0	9.64081	0	0	7.25787	7.53203	0	9.01796	0	0	9.8865	9.30189	0	7.26991	6.95594	8.57531	0
Cocaine esterase (EC 3.1.1.84) (Carboxylesterase 2) (CE-2) (hCE-2) (EC 3.1.1.1) (Methylumbelliferyl-acetate deacetylase 2) (EC 3.1.1.56)	CES2	0	0	0	0	0	0	0	0	0	8.75419	8.50819	0	0	0	0	0	0	0	0	0	0	8.50179	7.92436	0	8.48621	9.03071	9.0297	0	0	0	0	0	0	9.77758	0	0	0	0	0	0	8.71121	7.7887	0	0	8.75619	0	0	9.22607
GrpE protein homolog 1, mitochondrial (HMGE) (Mt-GrpE#1)	GRPEL1	8.22785	7.94744	0	0	0	0	0	9.37604	9.03459	0	7.69315	0	0	0	8.93286	7.73459	9.19018	7.69362	0	0	0	0	0	0	7.25411	0	0	8.66728	0	0	0	0	7.55132	0	9.37253	8.74064	0	0	0	6.41381	8.19147	0	7.32105	0	7.80124	9.69417	7.68697	0
DIS3-like exonuclease 2 (hDIS3L2) (EC 3.1.13.-)	DIS3L2	0	0	0	0	0	0	0	0	0	0	0	0	0	0	0	0	0	0	0	0	0	0	0	8.39312	0	0	0	0	0	0	0	0	0	9.01041	0	0	0	0	0	7.64895	0	0	0	0	0	0	0	0
Protein NDRG4 (Brain development-related molecule 1) (N-myc downstream-regulated gene 4 protein) (Vascular smooth muscle cell-associated protein 8) (SMAP-8)	NDRG4	0	0	0	0	7.22142	0	0	0	0	0	0	0	0	0	0	0	11.9034	0	8.48789	0	0	0	0	0	0	0	0	10.7073	0	0	0	0	0	0	0	0	9.07901	0	8.90829	0	9.66601	0	0	9.08944	0	0	0	0
ATP-dependent RNA helicase DDX19B (EC 3.6.4.13) (DEAD box RNA helicase DEAD5) (DEAD box protein 19B)	DDX19B	0	0	0	0	0	0	0	0	0	0	0	0	0	0	0	0	0	0	0	0	0	7.76174	0	0	7.83155	7.8407	7.55045	0	0	0	0	0	8.80041	0	0	0	0	8.77438	8.77181	0	0	8.86558	0	9.29099	0	0	0	9.82027
DNA replication licensing factor MCM4 (EC 3.6.4.12) (CDC21 homolog) (P1-CDC21)	MCM4	0	0	0	0	0	0	0	0	0	9.96724	0	0	0	0	0	0	0	0	0	0	8.39312	0	0	0	0	0	0	0	0	0	0	0	0	0	0	9.20971	0	0	0	0	0	0	0	7.69431	0	0	7.74832	0
E3 ubiquitin-protein ligase XIAP (EC 2.3.2.27) (Baculoviral IAP repeat-containing protein 4) (IAP-like protein) (ILP) (hILP) (Inhibitor of apoptosis protein 3) (IAP-3) (hIAP-3) (hIAP3) (RING-type E3 ubiquitin transferase XIAP) (X-linked inhibitor of apoptosis protein) (X-linked IAP)	XIAP	6.98611	0	0	0	0	0	0	0	0	0	7.55596	0	0	0	0	0	0	0	0	0	0	0	0	0	0	0	0	0	0	0	0	0	8.17595	0	0	0	0	0	0	7.11894	8.41973	0	7.59889	0	0	8.33848	6.48648	9.87845
Anion exchange transporter (Solute carrier family 26 member 7)	SLC26A7	0	0	0	0	10.0656	0	0	0	0	0	0	0	0	0	0	0	0	8.166	0	0	0	0	0	0	0	0	0	0	9.89849	7.71303	0	0	7.08039	0	0	0	0	0	10.0487	0	0	0	0	0	9.29726	8.46815	0	0
ADP-ribose glycohydrolase MACROD2 (MACRO domain-containing protein 2) (O-acetyl-ADP-ribose deacetylase MACROD2) (EC 3.5.1.-) ([Protein ADP-ribosylaspartate] hydrolase MACROD2) (EC 3.2.2.-) ([Protein ADP-ribosylglutamate] hydrolase MACROD2) (EC 3.2.2.-)	MACROD2	0	0	0	0	0	0	8.2994	0	0	0	0	0	0	0	0	0	8.85624	0	0	0	7.86235	0	0	0	0	0	0	0	7.20737	8.67991	0	0	8.96999	0	7.68358	0	0	8.87626	9.53978	0	0	8.8478	8.65925	0	0	7.31553	0	0
Disintegrin and metalloproteinase domain-containing protein 15 (ADAM 15) (EC 3.4.24.-) (Metalloprotease RGD disintegrin protein) (Metalloproteinase-like, disintegrin-like, and cysteine-rich protein 15) (MDC-15) (Metargidin)	ADAM15	0	0	0	0	0	0	0	0	0	9.61012	0	5.88093	0	0	0	0	0	0	0	0	0	0	0	0	0	0	0	0	8.17795	6.42582	0	0	0	7.8018	0	0	0	0	0	0	0	0	0	8.34233	0	0	0	0
AT-rich interactive domain-containing protein 1A (ARID domain-containing protein 1A) (B120) (BRG1-associated factor 250) (BAF250) (BRG1-associated factor 250a) (BAF250A) (Osa homolog 1) (hOSA1) (SWI-like protein) (SWI/SNF complex protein p270) (SWI/SNF-related, matrix-associated, actin-dependent regulator of chromatin subfamily F member 1) (hELD)	ARID1A	0	0	0	0	0	0	0	0	0	0	0	0	0	0	0	0	0	0	0	0	0	0	0	0	0	0	0	0	0	0	0	0	0	0	0	0	0	0	0	7.43315	0	9.45304	0	0	8.66681	0	7.04585	0
Fatty acid-binding protein, brain (Brain lipid-binding protein) (BLBP) (Brain-type fatty acid-binding protein) (B-FABP) (Fatty acid-binding protein 7) (Mammary-derived growth inhibitor related)	FABP7	0	0	0	8.21005	0	7.40979	0	7.44292	0	0	0	0	0	0	0	10.3257	10.5915	0	7.27653	0	8.24231	8.5909	0	8.62768	0	0	0	11.4616	0	0	0	0	0	0	0	10.5843	0	0	10.4166	0	0	0	0	7.7516	0	0	0	0
Bactericidal permeability-increasing protein (BPI) (CAP 57)	BPI	0	8.61724	8.50831	6.54879	9.8209	8.39391	6.32215	6.27267	0	0	9.28486	8.38758	0	10.3242	0	0	0	7.7625	8.07782	8.489	0	8.2277	8.39427	8.65621	0	7.31424	0	8.69636	0	8.31642	6.94203	9.58472	0	0	10.462	7.3514	7.11667	0	0	8.20627	0	8.12317	0	8.26685	0	0	0	7.2922
Signal peptidase complex catalytic subunit SEC11C (EC 3.4.21.89) (Microsomal signal peptidase 21 kDa subunit) (SPase 21 kDa subunit) (SEC11 homolog C) (SEC11-like protein 3) (SPC21)	SEC11C	0	9.67132	0	8.58804	0	0	0	9.68402	10.5513	0	0	0	9.14139	0	10.2924	8.46972	8.968	9.26772	0	6.2936	0	0	0	0	0	7.58429	0	9.38243	0	0	0	0	0	0	6.93214	8.75983	0	0	0	0	0	7.64879	9.20749	0	8.94017	0	0	0
GATOR2 complex protein WDR59 (WD repeat-containing protein 59)	WDR59	0	10.5373	0	0	0	6.07755	0	0	11.0034	0	7.10706	0	0	0	0	0	0	0	0	0	0	9.50452	0	0	0	0	0	0	8.22328	0	0	0	0	0	0	0	0	0	0	0	0	8.85683	0	0	0	0	0	0
Kinesin-like protein KIF1B (Klp)	KIF1B	0	0	0	0	0	0	10.0568	0	0	0	0	0	0	0	0	0	9.3881	0	0	0	6.38789	10.8077	0	0	0	0	0	0	0	0	0	0	0	7.01399	0	0	0	0	0	7.09761	0	0	7.10207	0	0	7.71984	7.52068	0
Rho GTPase-activating protein 12 (Rho-type GTPase-activating protein 12)	ARHGAP12	0	0	0	0	0	0	0	0	0	0	7.2532	0	0	0	0	0	0	0	0	0	0	0	0	0	0	9.0818	0	0	0	0	0	0	0	0	0	0	0	0	8.72047	6.41797	0	0	0	0	0	0	0	8.35266
1-acyl-sn-glycerol-3-phosphate acyltransferase epsilon (EC 2.3.1.51) (1-acylglycerol-3-phosphate O-acyltransferase 5) (1-AGP acyltransferase 5) (1-AGPAT 5) (Lysophosphatidic acid acyltransferase epsilon) (LPAAT-epsilon)	AGPAT5	0	0	0	0	0	0	0	0	0	0	8.30909	0	0	0	0	9.51704	10.2395	0	0	0	8.52558	0	0	0	0	0	7.91962	11.5862	7.87173	0	0	0	9.23379	0	0	9.30911	8.2141	0	0	8.53239	0	0	9.26509	0	8.02992	8.42119	0	0
Proline-rich protein PRCC (Papillary renal cell carcinoma translocation-associated gene protein)	PRCC	0	0	0	0	0	0	0	10.2647	9.8724	0	0	8.76484	9.59395	7.94285	10.3661	0	7.27951	10.0923	0	0	0	0	0	0	9.70117	0	8.23006	0	8.33404	8.25394	0	0	8.2072	0	0	9.5365	0	8.80777	9.94373	0	0	0	8.60809	0	9.41198	9.52742	9.93609	10.526
COMM domain-containing protein 1 (Protein Murr1)	COMMD1	0	8.24715	0	0	0	0	0	9.12918	0	0	0	0	9.43171	0	0	6.86893	0	0	0	0	0	0	0	0	0	0	0	0	0	0	0	0	8.36046	0	0	0	0	0	0	0	8.07831	0	7.72852	0	7.97403	0	0	9.13982
Serine/threonine-protein phosphatase 2A 55 kDa regulatory subunit B delta isoform (PP2A subunit B isoform B55-delta) (PP2A subunit B isoform PR55-delta) (PP2A subunit B isoform R2-delta) (PP2A subunit B isoform delta)	PPP2R2D	0	0	0	0	0	0	0	0	0	0	0	0	0	0	0	0	0	0	9.49756	0	0	0	9.33656	9.76775	0	0	0	0	0	0	9.80151	9.31244	0	0	0	0	9.80245	0	0	0	11.1034	0	0	0	0	0	0	12.5524
Unhealthy ribosome biogenesis protein 2 homolog	URB2	0	0	0	0	0	0	0	0	0	9.62412	0	0	0	0	0	0	0	0	0	0	0	0	0	0	0	0	0	0	0	0	0	0	0	0	7.33619	0	0	0	0	8.4271	0	0	0	0	0	0	0	0
2-5A-dependent ribonuclease (2-5A-dependent RNase) (EC 3.1.26.-) (Ribonuclease 4) (Ribonuclease L) (RNase L)	RNASEL	0	0	0	6.95696	0	0	0	0	0	0	10.3625	0	0	0	0	8.55599	0	0	0	8.26484	8.42247	9.9055	0	0	0	9.60394	0	0	8.96251	8.52641	0	0	8.51435	0	7.7936	8.86073	0	8.8871	0	0	9.48585	0	8.25396	0	0	8.04582	0	0
Telomeric repeat-binding factor 2 (TTAGGG repeat-binding factor 2) (Telomeric DNA-binding protein)	TERF2	0	0	0	0	0	0	0	0	9.3695	0	0	0	0	0	0	0	0	8.81701	0	0	8.44157	0	0	0	8.89998	0	7.59636	0	8.52434	0	0	0	8.31809	0	0	8.10193	0	0	9.97624	8.60538	0	9.09615	8.22112	0	8.53974	7.42791	0	0
Inactive tyrosine-protein kinase PEAK1 (Pseudopodium-enriched atypical kinase 1) (Sugen kinase 269) (Tyrosine-protein kinase SgK269)	PEAK1	0	0	0	0	0	0	0	0	0	0	0	0	0	0	0	0	0	0	6.73352	0	0	0	0	7.70685	0	0	0	0	0	0	0	7.32831	0	6.88237	0	0	0	0	0	0	0	0	0	9.27759	0	0	0	0
Polycystin-2 (PC2) (Autosomal dominant polycystic kidney disease type II protein) (Polycystic kidney disease 2 protein) (Polycystwin) (R48321) (Transient receptor potential cation channel subfamily P member 2)	PKD2	0	0	0	0	0	0	0	0	0	0	9.06094	0	8.84515	0	0	9.01689	0	0	0	0	0	0	0	0	0	0	0	0	0	7.97918	0	0	0	0	0	0	0	10.3475	0	8.66844	0	9.44911	0	9.90611	0	9.24034	0	10.8091
Protein SERAC1 (Serine active site-containing protein 1)	SERAC1	0	0	0	0	0	0	0	0	0	0	0	8.21072	0	0	0	0	0	0	0	0	0	0	0	0	0	0	0	0	0	0	0	0	0	7.40237	0	0	0	0	0	0	0	0	0	0	0	0	0	11.0776
Protein PALS1 (MAGUK p55 subfamily member 5) (Membrane protein, palmitoylated 5) (Protein associated with Lin-7 1)	PALS1	0	0	0	0	0	0	0	0	0	0	0	0	0	0	0	0	0	0	0	0	0	0	0	0	0	0	0	0	0	0	7.90272	0	0	0	0	0	0	0	8.61229	0	8.88623	0	0	0	0	0	0	10.101
L-2-hydroxyglutarate dehydrogenase, mitochondrial (EC 1.1.99.2) (Duranin)	L2HGDH	0	0	0	0	0	0	0	0	0	10.3502	0	0	0	0	0	0	0	0	0	0	0	0	7.90796	0	0	0	0	0	0	0	0	0	0	9.21366	0	0	6.75262	0	10.0989	7.32631	0	0	0	0	0	0	0	0
Diacylglycerol O-acyltransferase 1 (EC 2.3.1.20) (ACAT-related gene product 1) (Acyl-CoA retinol O-fatty-acyltransferase) (ARAT) (Retinol O-fatty-acyltransferase) (EC 2.3.1.76) (Diglyceride acyltransferase)	DGAT1	0	0	0	0	0	0	0	0	0	8.72158	0	7.06436	0	0	0	0	0	0	0	6.08832	0	6.56262	0	0	7.2033	8.20062	0	0	0	8.63575	0	0	0	0	0	0	0	8.66548	8.49795	0	0	7.96482	0	7.91102	0	0	0	0
Small subunit processome component 20 homolog (Down-regulated in metastasis protein) (Novel nucleolar protein 73) (NNP73) (Protein Key-1A6)	UTP20	0	0	0	0	0	0	0	0	0	0	0	0	0	0	9.55055	0	0	0	7.70764	0	0	0	6.60742	0	0	0	0	0	0	0	0	0	0	8.61892	5.64904	0	0	8.56739	0	0	0	0	0	8.37698	0	0	0	0
Nuclear receptor 2C2-associated protein (TR4 orphan receptor-associated 16 kDa protein)	NR2C2AP	0	0	0	0	0	0	0	0	0	0	0	0	0	0	0	0	0	8.56197	6.61661	0	0	0	0	0	0	0	0	0	0	0	0	0	0	7.38025	0	8.9567	0	0	0	6.64345	0	0	0	0	0	9.74645	0	0
Ubiquinol-cytochrome c reductase complex assembly factor 1 (Basic FGF-repressed Zic-binding protein) (bFGF-repressed Zic-binding protein) (bFZb) (Ubiquinol-cytochrome c reductase complex chaperone CBP3 homolog)	UQCC1	0	11.2889	0	0	0	0	0	0	0	0	0	0	0	0	0	0	0	0	9.06898	0	0	0	0	0	0	0	0	9.93188	0	0	0	0	10.3873	9.78716	0	0	8.93123	0	0	0	9.31776	0	0	0	0	0	8.47539	0
Neurocalcin-delta	NCALD	9.52036	12.2931	7.44721	0	8.45413	0	0	9.07894	8.89775	0	0	0	0	0	0	10.0408	11.0248	10.1123	8.59373	8.50906	0	0	7.23476	8.19516	0	0	0	11.3742	9.28202	0	7.44064	0	9.40189	7.60337	0	8.11975	0	9.57947	0	0	0	0	9.42171	8.93088	0	8.31793	9.33256	11.0326
Forkhead box protein C2 (Forkhead-related protein FKHL14) (Mesenchyme fork head protein 1) (MFH-1 protein) (Transcription factor FKH-14)	FOXC2	8.97388	0	0	0	0	0	0	0	10.2708	9.18306	10.3031	0	10.1577	0	0	0	0	9.97383	0	8.46558	7.70066	8.59279	0	0	10.0646	0	0	9.75452	9.60448	9.09427	0	0	9.39627	0	0	10.1024	0	0	9.49317	8.40536	0	0	8.06986	0	9.29576	10.81	9.53059	9.16613
CMRF35-like molecule 8 (CLM-8) (CD300 antigen-like family member A) (CMRF-35-H9) (CMRF35-H9) (CMRF35-H) (IRC1/IRC2) (Immunoglobulin superfamily member 12) (IgSF12) (Inhibitory receptor protein 60) (IRp60) (NK inhibitory receptor) (CD antigen CD300a)	CD300A	0	0	0	0	0	0	0	0	0	0	0	0	0	0	0	0	0	0	0	0	0	0	0	0	0	0	0	0	0	0	0	7.86939	0	0	6.79977	0	0	8.86384	7.52048	7.9665	0	0	0	0	0	0	0	0
Solute carrier family 53 member 1 (Phosphate exporter SLC53A1) (Protein SYG1 homolog) (Xenotropic and polytropic murine leukemia virus receptor X3) (X-receptor) (Xenotropic and polytropic retrovirus receptor 1)	XPR1	0	0	0	0	0	0	0	0	0	0	0	0	0	0	0	0	0	0	0	0	0	0	0	0	0	0	0	0	0	0	0	0	0	0	0	0	0	0	0	0	0	0	0	0	0	0	0	0
Deoxyribonuclease-2-alpha (EC 3.1.22.1) (Acid DNase) (Deoxyribonuclease II alpha) (DNase II alpha) (Lysosomal DNase II) (R31240_2)	DNASE2	0	0	0	0	0	0	0	0	0	0	0	0	0	0	0	0	0	0	0	0	0	0	0	0	0	0	0	0	0	0	0	0	0	0	0	0	0	0	0	0	0	0	0	0	0	0	0	0
Pumilio homolog 2 (Pumilio-2)	PUM2	0	0	0	0	0	0	0	9.77171	9.95929	0	0	0	9.66744	0	9.7039	0	8.03019	7.963	0	0	0	0	0	0	0	9.67344	0	0	0	0	7.48966	0	8.25617	0	0	8.98911	0	0	0	0	9.14479	0	9.00959	0	8.05646	0	0	8.98727
Trafficking protein particle complex subunit 6B (TRAPP complex subunit 6B)	TRAPPC6B	0	0	0	0	0	0	0	0	0	0	7.80953	0	0	0	0	6.96138	0	0	0	0	0	0	0	0	0	0	0	0	0	0	0	0	0	7.5414	7.00272	0	0	0	0	0	0	0	0	0	0	0	7.97274	0
Ephrin type-B receptor 2 (EC 2.7.10.1) (Developmentally-regulated Eph-related tyrosine kinase) (ELK-related tyrosine kinase) (EPH tyrosine kinase 3) (EPH-like kinase 5) (EK5) (hEK5) (Renal carcinoma antigen NY-REN-47) (Tyrosine-protein kinase TYRO5) (Tyrosine-protein kinase receptor EPH-3) [Cleaved into: EphB2/CTF1; EphB2/CTF2]	EPHB2	0	10.0792	7.05117	0	0	7.85049	9.3048	8.72042	0	0	0	0	0	0	0	7.95071	8.24481	9.14716	0	0	0	0	0	0	9.71105	7.71743	7.70791	0	8.2616	0	7.20395	0	9.59437	8.87686	0	0	0	8.66606	10.0776	6.81773	7.72053	0	9.58916	8.83752	8.15576	9.03646	8.70071	8.8729
Ubiquitin carboxyl-terminal hydrolase 16 (EC 3.4.19.12) (Deubiquitinating enzyme 16) (Ubiquitin thioesterase 16) (Ubiquitin-processing protease UBP-M) (Ubiquitin-specific-processing protease 16)	USP16	0	0	0	0	0	0	0	0	0	0	0	0	0	0	0	0	0	0	0	0	6.74122	0	0	0	0	0	0	0	0	0	0	0	0	0	0	0	0	0	0	0	0	0	0	0	0	0	0	0
DDB1- and CUL4-associated factor 13 (WD repeat and SOF domain-containing protein 1)	DCAF13	0	0	0	0	0	0	0	0	0	0	0	0	0	0	0	0	0	0	0	0	0	0	0	0	0	0	0	0	0	0	0	0	0	0	0	0	0	0	0	0	0	0	0	0	0	0	0	0
MICOS complex subunit MIC25 (Coiled-coil-helix cristae morphology protein 1) (Coiled-coil-helix-coiled-coil-helix domain-containing protein 6)	CHCHD6	0	9.63004	0	0	0	0	0	9.87762	9.25428	8.1877	9.5522	0	9.07762	0	0	9.28065	11.6843	9.23463	0	0	6.73027	0	0	0	8.48749	0	8.98914	10.2005	9.36557	0	0	0	10.0594	0	0	8.5545	0	0	8.93959	6.88386	8.10202	0	9.07136	0	9.41929	10.394	7.96186	9.83757
Leucine-rich repeat and calponin homology domain-containing protein 1 (Calponin homology domain-containing protein 1) (Neuronal protein 81) (NP81)	LRCH1	0	0	0	0	0	0	0	0	0	0	0	0	0	0	0	0	0	0	0	7.99316	0	8.12227	0	0	0	8.78661	0	0	0	0	7.77165	0	0	0	0	0	7.90928	8.70742	0	8.23375	0	8.90622	0	0	0	0	0	0
Cytosolic arginine sensor for mTORC1 subunit 2 (Cellular arginine sensor for mTORC1 protein 2) (GATS-like protein 2)	CASTOR2	0	0	0	0	0	0	0	0	0	0	0	7.95303	0	0	0	0	0	0	0	0	0	0	0	8.85558	0	0	0	0	0	0	0	0	0	9.66709	0	0	8.90918	10.9275	9.61454	0	0	0	0	0	0	0	0	11.7886
Cytospin-A (Renal carcinoma antigen NY-REN-22) (Sperm antigen with calponin homology and coiled-coil domains 1-like) (SPECC1-like protein)	SPECC1L	0	0	0	0	0	0	9.86955	0	0	0	0	0	0	0	9.0114	0	7.96809	0	0	0	0	0	0	8.07973	8.46107	0	8.74102	0	0	7.58113	8.84329	7.88406	0	8.63678	0	0	0	0	0	0	9.2722	0	7.42872	8.49293	0	8.83605	0	0
Progesterone receptor (PR) (Nuclear receptor subfamily 3 group C member 3)	PGR	0	0	0	0	0	0	0	0	0	0	0	0	0	0	0	0	0	0	0	0	0	7.90599	0	0	0	0	0	0	8.91474	0	0	0	9.16606	0	0	0	0	0	0	0	0	0	9.44187	0	8.31335	8.4381	0	9.35571
H/ACA ribonucleoprotein complex subunit 1 (Nucleolar protein family A member 1) (snoRNP protein GAR1)	GAR1	0	7.26551	0	0	0	0	0	7.34433	6.36283	6.3151	0	0	6.63911	0	7.52537	0	0	7.12493	0	0	0	5.94723	0	0	7.47474	0	0	7.73847	0	0	0	0	7.32879	0	0	7.37578	0	7.59146	0	0	0	0	0	0	6.92422	0	7.68766	7.55719
Interferon regulatory factor 2-binding protein 2 (IRF-2-binding protein 2) (IRF-2BP2)	IRF2BP2	0	0	0	0	0	0	0	0	0	0	0	0	0	0	10.6242	7.44813	0	0	0	0	0	0	0	0	0	0	0	0	0	0	0	0	6.97185	0	0	0	0	0	0	0	0	0	0	0	7.23559	0	0	0
Glia-derived nexin (GDN) (Peptidase inhibitor 7) (PI-7) (Protease nexin 1) (PN-1) (Protease nexin I) (Serpin E2)	SERPINE2	0	0	8.45919	9.72989	7.99545	8.71229	7.50118	0	0	8.89001	0	0	0	8.67097	0	8.30596	8.56186	0	8.85056	8.0686	0	0	8.5535	8.36869	0	0	0	8.13357	0	7.84586	8.76771	7.52517	0	10.1032	8.62286	0	10.3617	0	0	0	7.48786	7.13126	0	7.96154	0	0	6.97518	9.485
Hamartin (Tuberous sclerosis 1 protein)	TSC1	0	0	0	0	0	0	0	0	0	0	0	0	10.9506	0	0	0	0	0	0	0	0	0	0	0	0	0	8.64405	0	8.6144	0	8.19637	0	8.70845	0	0	0	0	0	0	0	0	0	0	0	9.03247	0	0	0
ADP-ribose glycohydrolase MACROD1 (MACRO domain-containing protein 1) (O-acetyl-ADP-ribose deacetylase MACROD1) (EC 3.1.1.106) (Protein LRP16) ([Protein ADP-ribosylaspartate] hydrolase MACROD1) (EC 3.2.2.-) ([Protein ADP-ribosylglutamate] hydrolase MACROD1) (EC 3.2.2.-)	MACROD1	0	10.2475	0	0	0	0	0	9.5059	9.74256	0	8.37585	0	9.0037	0	9.76183	8.55733	9.33598	8.89145	0	0	6.07908	0	0	0	0	8.20363	7.29241	9.66737	8.49006	0	0	0	9.11333	9.63466	0	7.27489	0	0	0	7.54584	8.30861	0	8.32351	0	8.67945	10.2489	6.87512	8.66768
Protein FAM83H	FAM83H	0	0	0	0	0	0	0	0	0	0	0	0	0	0	0	0	0	9.11908	0	0	0	0	0	0	0	0	0	8.37722	0	0	0	0	8.90674	0	0	7.98821	0	0	0	0	0	0	0	0	0	8.12376	0	0
L-amino-acid oxidase (LAAO) (LAO) (EC 1.4.3.2) (EC 1.4.3.25) (Interleukin-4-induced protein 1) (IL4-induced protein 1) (hIL4I1) (Protein Fig-1) (hFIG1)	IL4I1	0	0	0	9.8933	0	0	0	9.42391	0	0	0	0	0	7.46281	0	0	0	0	0	0	8.62542	10.5189	0	0	8.58832	0	0	0	0	0	0	0	0	0	8.50506	0	8.35091	0	0	7.19569	0	8.64933	0	0	0	0	0	0
Neutrophil cytosol factor 4 (NCF-4) (Neutrophil NADPH oxidase factor 4) (SH3 and PX domain-containing protein 4) (p40-phox) (p40phox)	NCF4	0	10.3551	0	8.55796	9.82258	0	0	10.1063	9.68378	0	0	0	0	9.08235	0	0	0	0	7.31443	0	8.41051	0	0	9.48915	9.05628	0	0	10.0814	8.54374	0	0	9.63097	0	0	9.02927	0	8.69706	9.45853	0	8.29779	0	0	0	9.47045	0	0	9.60258	0
DNA-directed RNA polymerase II subunit RPB9 (RNA polymerase II subunit B9) (DNA-directed RNA polymerase II subunit I) (RNA polymerase II 14.5 kDa subunit) (RPB14.5)	POLR2I	0	0	0	0	0	0	0	0	0	0	0	7.13522	0	0	0	0	0	0	0	0	0	7.9164	0	0	7.96887	0	0	0	0	0	0	0	0	0	0	0	0	0	8.44708	0	0	8.80921	0	0	8.0411	0	0	0
Acylphosphatase-2 (EC 3.6.1.7) (Acylphosphatase, muscle type isozyme) (Acylphosphate phosphohydrolase 2)	ACYP2	0	0	0	0	0	0	0	0	0	0	0	0	8.25748	7.45411	9.47566	8.81044	11.0149	0	0	0	0	0	0	0	0	0	8.34602	9.74893	7.7425	0	0	0	0	7.80551	0	0	0	0	0	6.72326	8.93261	7.59072	8.88975	0	0	0	0	8.63239
Beta-sarcoglycan (Beta-SG) (43 kDa dystrophin-associated glycoprotein) (43DAG) (A3b)	SGCB	0	0	0	0	8.55261	8.955	9.38741	0	10.3072	0	0	0	0	0	0	0	0	0	8.19292	0	0	8.64649	8.92827	8.42067	8.34392	0	9.1486	0	7.51948	7.94517	9.44721	8.78372	0	9.79491	0	7.64871	7.47181	8.64223	0	0	0	8.48901	8.45125	8.64366	0	7.76218	0	8.6593
Claudin-5 (Transmembrane protein deleted in VCFS) (TMDVCF)	CLDN5	0	0	6.41592	0	9.2643	8.89018	9.48757	0	0	7.99676	0	0	0	8.48427	0	0	8.88708	0	0	0	0	0	9.95979	7.53498	0	0	0	0	0	7.21015	7.51933	7.9996	0	0	0	0	8.12464	7.46525	7.1931	0	0	8.14256	0	8.29827	0	6.95176	0	11.1603
Tumor necrosis factor receptor type 1-associated DEATH domain protein (TNFR1-associated DEATH domain protein) (TNFRSF1A-associated via death domain)	TRADD	5.75451	0	0	0	0	0	0	0	0	0	0	0	9.54713	0	0	0	0	6.622	0	0	0	0	0	0	0	0	0	8.21357	0	0	0	0	0	6.59991	0	0	0	0	0	0	0	0	6.72705	0	7.09419	0	0	0
Protein strawberry notch homolog 1 (Monocyte protein 3) (MOP-3)	SBNO1	0	0	0	0	0	0	0	0	0	0	0	0	0	0	0	0	0	0	0	0	0	0	0	0	0	0	0	0	0	0	0	0	0	0	0	0	0	0	0	0	0	0	0	0	0	0	0	0
Carboxypeptidase D (EC 3.4.17.22) (Metallocarboxypeptidase D) (gp180)	CPD	0	0	0	0	9.41459	0	0	0	0	10.6816	0	8.87001	0	0	0	0	7.78264	0	0	9.08015	0	9.31697	0	0	9.91341	10.8498	0	0	0	8.52076	0	0	0	0	9.40109	0	0	0	9.86659	9.4333	0	9.76669	0	0	9.6398	0	9.36386	0
Immunoglobulin kappa variable 1D-33 (Ig kappa chain V-I region AG) (Ig kappa chain V-I region Bi) (Ig kappa chain V-I region Lay) (Ig kappa chain V-I region Ni) (Ig kappa chain V-I region Rei) (Ig kappa chain V-I region Roy) (Ig kappa chain V-I region Scw) (Ig kappa chain V-I region WAT)	IGKV1D-33	0	0	9.47722	0	8.70819	0	10.5964	0	0	0	0	0	0	10.1896	0	0	0	0	10.3236	7.28828	0	8.72461	9.54652	10.3575	8.18863	0	0	0	0	9.79314	10.1598	9.64252	0	9.41761	8.41333	0	8.39029	9.3189	0	0	7.99224	9.58154	0	0	6.7923	0	7.50633	0
Ral GTPase-activating protein subunit alpha-1 (GAP-related-interacting partner to E12) (GRIPE) (GTPase-activating Rap/Ran-GAP domain-like 1) (Tuberin-like protein 1) (p240)	RALGAPA1	0	0	0	0	0	0	0	0	0	0	0	6.40883	0	0	0	7.37882	0	9.01866	0	0	0	0	0	0	0	0	0	10.6134	8.62677	0	0	0	8.65569	0	0	0	0	0	0	0	0	0	8.33011	0	8.06906	8.56708	7.16328	0
Lymphocyte function-associated antigen 3 (Ag3) (Surface glycoprotein LFA-3) (CD antigen CD58)	CD58	0	10.6881	0	0	11.9163	10.4883	9.78469	0	0	10.3245	0	10.6511	0	10.6945	0	0	8.92175	0	10.2134	0	0	10.9245	9.93958	9.22133	10.9527	10.9168	0	10.9133	10.7522	0	9.18137	0	0	0	9.85278	0	9.81594	10.2333	10.4048	10.9079	0	9.94165	11.0312	10.3094	11.0256	10.3099	0	0
Integral membrane protein 2C (Cerebral protein 14) (Transmembrane protein BRI3) [Cleaved into: CT-BRI3]	ITM2C	0	0	0	0	0	0	0	0	0	9.30008	0	6.18793	0	0	0	0	0	0	7.07104	7.33973	8.97857	0	0	0	0	9.66931	0	0	0	0	0	0	0	0	0	0	9.02636	8.45126	9.50457	0	0	0	0	0	0	0	0	11.7081
PHD finger protein 14	PHF14	0	0	0	0	0	0	0	0	0	9.78928	0	0	0	0	0	0	0	7.28407	0	0	7.87745	0	0	0	0	0	0	0	8.61507	0	0	0	6.5903	0	0	0	0	0	0	6.18888	0	0	7.7952	0	8.27426	0	0	0
Origin recognition complex subunit 4	ORC4	0	0	0	0	0	0	0	0	0	0	0	0	0	0	0	0	0	0	0	0	0	0	0	0	0	0	0	0	0	0	0	0	0	7.969	0	0	0	0	0	0	0	0	0	0	0	0	0	0
FYVE, RhoGEF and PH domain-containing protein 5 (Zinc finger FYVE domain-containing protein 23)	FGD5	0	0	0	0	0	0	0	0	0	0	0	0	0	0	0	0	0	0	0	0	0	0	9.53656	8.36142	0	0	0	0	0	0	0	0	9.22098	0	0	0	0	0	0	0	0	0	0	0	0	10.9203	9.29011	0
Cyclin-L1 (Cyclin-L)	CCNL1	0	0	0	0	0	0	0	0	0	0	0	0	0	0	0	0	0	0	0	0	9.03448	0	0	0	0	0	0	0	0	0	0	0	0	0	0	0	0	0	0	0	0	0	0	0	0	0	0	0
Fibroblast growth factor 2 (FGF-2) (Basic fibroblast growth factor) (bFGF) (Heparin-binding growth factor 2) (HBGF-2)	FGF2	0	0	0	8.41512	0	0	0	0	0	0	0	0	0	0	12.4856	0	10.6018	0	0	8.18272	7.94562	9.28406	9.1036	0	9.87232	0	10.9707	10.6499	11.7599	0	7.80927	0	11.6871	0	0	0	0	8.18617	8.39672	8.7644	0	0	0	9.14055	0	0	10.322	9.57343
Clusterin-associated protein 1 (Qilin)	CLUAP1	0	0	0	0	0	0	0	0	0	0	0	8.1121	0	0	0	0	0	0	0	0	0	0	0	0	7.86948	0	0	0	0	0	0	0	8.64365	0	0	0	0	8.55809	7.7017	0	7.71597	0	0	0	0	0	0	8.80325
Protein AATF (Apoptosis-antagonizing transcription factor) (Rb-binding protein Che-1)	AATF	0	0	0	0	0	0	0	0	0	0	0	0	0	8.79097	11.2155	0	0	0	0	0	10.046	0	0	0	0	0	0	0	0	0	0	0	0	0	0	0	0	0	0	0	0	0	0	0	0	0	0	9.94374
Cytosolic arginine sensor for mTORC1 subunit 1 (Cellular arginine sensor for mTORC1 protein 1) (GATS-like protein 3)	CASTOR1	0	0	0	0	0	0	0	0	0	0	0	7.48483	0	0	0	0	0	0	8.22768	0	0	0	0	8.57157	0	0	0	0	0	0	0	8.28103	0	0	0	0	8.95837	0	0	0	0	0	0	0	0	0	0	0
Metalloproteinase inhibitor 3 (Protein MIG-5) (Tissue inhibitor of metalloproteinases 3) (TIMP-3)	TIMP3	0	0	11.2364	11.7637	9.35668	10.8966	10.0965	0	0	9.18475	8.36001	0	10.2836	9.776	0	9.54378	0	10.3001	13.1574	8.90851	0	9.82751	11.4582	11.9412	9.31618	0	10.4202	9.21834	10.6466	7.5796	11.0614	11.6014	8.62148	8.28037	0	0	10.4288	0	10.3703	7.35439	0	9.85993	8.43216	11.2173	7.7035	8.93565	0	11.057
CYFIP-related Rac1 interactor A (Protein CYRIA)	CYRIA	7.18222	0	0	0	0	0	9.54034	0	9.44428	0	0	0	0	0	10.2074	7.09486	9.44276	0	0	0	0	0	0	7.88234	0	0	7.52249	9.65034	0	0	8.10168	8.00555	0	7.21213	0	8.61767	7.24319	0	0	0	0	0	8.72012	0	0	0	8.35377	0
Protein Njmu-R1	C17orf75	0	0	0	5.37437	0	0	0	0	0	0	0	0	0	0	0	0	0	0	6.34089	9.2654	6.85427	0	0	0	0	0	0	0	0	0	9.24557	0	0	7.48418	4.79437	0	8.47201	0	0	0	0	0	0	0	0	0	0	9.12785
Lysophospholipase D GDPD1 (EC 3.1.4.-) (Glycerophosphodiester phosphodiesterase 4) (Glycerophosphodiester phosphodiesterase domain-containing protein 1)	GDPD1	0	0	0	0	0	0	0	0	0	0	0	0	0	0	0	0	9.35689	0	0	0	0	0	0	0	0	0	0	0	0	0	0	0	9.08449	0	0	0	7.61363	0	0	0	0	0	0	0	0	0	0	0
Carboxypeptidase N catalytic chain (CPN) (EC 3.4.17.3) (Anaphylatoxin inactivator) (Arginine carboxypeptidase) (Carboxypeptidase N polypeptide 1) (Carboxypeptidase N small subunit) (Kininase-1) (Lysine carboxypeptidase) (Plasma carboxypeptidase B) (Serum carboxypeptidase N) (SCPN)	CPN1	0	0	0	9.89085	0	10.0183	8.4605	0	0	0	0	10.1303	0	10.2202	0	0	0	0	10.6068	0	0	7.88992	10.0168	10.8145	0	0	0	0	0	0	0	10.1381	0	0	0	0	9.69113	0	0	7.67146	0	7.99811	0	9.75998	0	0	0	0
Eukaryotic translation initiation factor 4E type 2 (eIF-4E type 2) (eIF4E type 2) (Eukaryotic translation initiation factor 4E homologous protein) (Eukaryotic translation initiation factor 4E-like 3) (eIF4E-like protein 4E-LP) (mRNA cap-binding protein 4EHP) (h4EHP) (mRNA cap-binding protein type 3)	EIF4E2	0	0	0	0	0	0	0	0	0	0	0	0	0	0	0	0	0	0	0	0	6.23465	0	0	0	0	6.92502	0	0	0	0	0	0	0	6.53535	0	0	0	0	6.81646	0	6.89161	0	0	0	7.48533	7.62982	0	8.80696
Reticulocalbin-3 (EF-hand calcium-binding protein RLP49)	RCN3	0	0	8.74482	9.08179	8.68347	8.14915	9.44388	0	0	7.58248	0	0	0	8.9304	9.13269	0	0	0	8.59291	0	0	0	8.01275	9.59717	9.14856	8.40648	10.1544	0	0	10.1647	10.5118	8.63555	0	7.85553	0	0	7.57141	8.84406	8.76551	8.28763	10.5598	8.61003	0	9.60806	0	0	0	0
Vesicle transport protein SFT2C (SFT2 domain-containing protein 3)	SFT2D3	0	0	0	0	8.52057	0	0	9.41486	7.72635	8.18768	0	8.79579	8.24251	8.1439	8.66302	0	0	8.64312	0	7.35674	0	7.84087	0	0	8.96318	7.98125	0	0	0	10.1537	0	0	9.35724	0	0	0	0	11.3159	7.49224	0	8.6535	0	9.23383	8.59796	9.38157	0	0	7.7936
Acid sphingomyelinase-like phosphodiesterase 3b (ASM-like phosphodiesterase 3b) (EC 3.1.4.-)	SMPDL3B	0	11.0221	0	0	0	0	0	0	0	0	0	0	0	0	0	0	0	0	0	0	0	0	0	0	0	0	0	0	9.82526	0	0	0	0	0	0	0	0	0	0	0	0	0	7.83595	0	8.59222	9.00831	8.83732	0
Epididymis-specific alpha-mannosidase (EC 3.2.1.24) (Alpha-1,6-mannosidase) (Mannosidase alpha class 2B member 2)	MAN2B2	0	0	0	0	0	0	0	0	0	0	0	0	0	0	0	0	0	0	0	7.62415	0	0	0	0	0	0	0	0	0	7.97347	0	0	0	0	7.29339	0	0	0	9.24776	0	8.67054	0	0	0	0	0	0	8.86939
Protein phosphatase 1 regulatory subunit 37 (Leucine-rich repeat-containing protein 68)	PPP1R37	0	0	0	0	0	0	0	0	0	0	0	7.60507	0	0	0	0	0	0	0	0	0	0	0	0	0	0	0	0	0	0	0	0	0	0	0	0	7.77046	0	0	0	0	0	0	0	0	0	0	0
Bystin	BYSL	0	0	0	0	0	0	0	0	9.65684	0	0	0	0	0	10.3559	7.81035	0	0	0	0	0	0	0	0	0	0	0	0	0	0	0	0	8.04162	0	0	0	0	0	0	0	0	0	8.26959	0	8.10584	0	0	0
Acyl-CoA dehydrogenase family member 10 (ACAD-10) (EC 1.3.99.-)	ACAD10	0	0	0	0	0	0	0	0	0	0	0	0	0	0	9.68484	0	0	0	0	0	0	0	0	0	0	0	0	0	0	0	0	0	0	0	0	0	0	0	0	0	0	0	0	0	0	0	0	0
Protein-associating with the carboxyl-terminal domain of ezrin (Ezrin-binding protein PACE-1) (SCY1-like protein 3)	SCYL3	0	0	0	0	0	0	0	0	10.0019	0	0	0	8.57283	0	0	0	0	0	0	0	0	0	0	0	0	9.45988	0	0	0	0	0	0	0	8.31917	0	0	0	0	0	0	9.04962	10.0031	0	0	0	0	0	8.3928
Cysteine-rich protein 1 (CRP-1) (Cysteine-rich heart protein) (CRHP) (hCRHP) (Cysteine-rich intestinal protein) (CRIP)	CRIP1	8.3676	10.5804	6.40551	0	0	0	0	9.70145	10.5673	0	8.95149	0	11.009	0	11.6088	10.5813	7.3848	11.2403	6.32888	0	4.91338	0	7.47923	0	0	0	10.8845	10.0554	9.62036	0	7.4273	6.69393	9.32211	0	0	9.52383	6.29987	0	0	0	0	0	9.5314	0	11.1742	13.8345	8.28876	9.51066
KH domain-containing RNA-binding protein QKI (Protein quaking) (Hqk) (HqkI)	QKI	0	9.49535	0	0	0	0	0	9.39696	10.2165	0	9.58249	0	10.7354	0	9.69484	0	8.71922	0	0	0	8.15873	0	0	0	8.91695	0	0	10.3067	0	0	0	0	9.69157	7.76345	9.73536	9.21319	0	0	10.2197	7.43922	9.28527	10.0031	7.5244	0	9.05736	9.18594	7.82175	9.31111
Caspase-8 (CASP-8) (EC 3.4.22.61) (Apoptotic cysteine protease) (Apoptotic protease Mch-5) (CAP4) (FADD-homologous ICE/ced-3-like protease) (FADD-like ICE) (FLICE) (ICE-like apoptotic protease 5) (MORT1-associated ced-3 homolog) (MACH) [Cleaved into: Caspase-8 subunit p18; Caspase-8 subunit p10]	CASP8	0	0	0	7.62842	0	0	0	0	0	0	0	0	0	0	0	0	0	0	0	0	0	0	0	8.22342	7.94875	8.8634	0	0	0	0	0	0	0	0	8.07639	0	7.45663	0	9.2177	9.1555	0	8.34677	0	0	0	0	8.36207	0
RNA polymerase II-associated factor 1 homolog (hPAF1) (Pancreatic differentiation protein 2)	PAF1	0	0	0	0	0	0	0	0	0	9.29148	0	6.7808	0	0	0	0	0	0	0	7.93208	9.50908	8.73019	0	0	9.68122	9.12675	0	0	0	7.67424	0	0	0	0	7.76988	0	0	9.26283	9.26887	0	8.73359	8.59869	0	8.37377	0	0	0	9.97065
Mesoderm induction early response protein 1 (Early response 1) (Er1) (Mi-er1) (hMi-er1)	MIER1	0	0	0	0	9.33117	9.0183	8.13702	0	0	8.46256	0	8.17349	0	7.49029	0	0	0	0	0	7.10172	0	0	0	0	9.15761	8.27192	0	0	0	8.62171	0	7.70606	0	0	7.61792	0	7.63137	9.66281	9.11521	8.02462	8.54654	8.1956	0	8.15022	0	0	0	0
Keratin, type II cytoskeletal 7 (Cytokeratin-7) (CK-7) (Keratin-7) (K7) (Sarcolectin) (Type-II keratin Kb7)	KRT7	0	0	0	7.14779	10.2909	0	0	0	0	7.8004	8.97922	0	0	0	0	0	11.6241	12.7747	0	0	11.0784	0	0	0	8.00554	8.97424	0	0	0	0	8.81056	0	0	0	0	8.94021	0	8.0579	8.57518	0	6.47506	9.07408	0	10.0057	11.0235	11.4999	8.27621	0
Tumor protein p63-regulated gene 1-like protein (Mossy fiber terminal-associated vertebrate-specific presynaptic protein) (Protein FAM79A)	TPRG1L	0	0	0	0	0	0	0	0	0	0	0	0	0	0	0	0	0	0	0	0	0	0	0	0	0	0	0	0	0	0	0	0	0	0	0	0	0	0	0	0	0	0	0	0	0	0	0	0
Tsukushi (E2-induced gene 4 protein) (Leucine-rich repeat-containing protein 54)	TSKU	0	0	0	7.39431	10.5266	8.13288	0	0	0	0	0	0	0	10.0147	0	0	0	0	8.48745	7.91075	0	0	0	0	0	0	0	0	0	0	0	0	0	0	7.99741	0	0	0	0	0	0	9.53906	0	0	0	0	0	0
Sushi, nidogen and EGF-like domain-containing protein 1 (Insulin-responsive sequence DNA-binding protein 1) (IRE-BP1)	SNED1	0	0	0	8.32166	0	9.57439	0	0	0	9.94038	0	6.8689	0	0	0	0	0	0	8.5429	7.16291	0	9.68232	7.82643	0	8.9569	8.52418	8.80628	0	10.0858	8.32396	8.81857	0	0	0	8.92769	0	8.76517	9.78623	9.29649	9.58543	8.81534	10.3459	0	8.47256	0	0	0	0
Proteasome assembly chaperone 4 (PAC-4) (hPAC4)	PSMG4	0	0	0	0	0	0	0	0	0	0	0	0	0	8.70392	0	0	0	0	0	0	0	0	7.96958	0	0	0	0	0	0	0	7.60462	0	0	8.08651	0	0	7.39627	0	0	0	0	0	0	0	0	0	0	0
Sodium-coupled neutral amino acid symporter 2 (Amino acid transporter A2) (Protein 40-9-1) (Solute carrier family 38 member 2) (System A amino acid transporter 2) (System A transporter 1) (System N amino acid transporter 2)	SLC38A2	0	0	0	0	9.64477	0	0	10.4755	0	8.97443	0	8.95398	0	0	0	0	8.89388	9.64067	0	7.81736	0	9.24043	0	0	8.44925	8.97586	0	0	9.34089	7.33634	0	0	10.8455	0	0	0	0	8.56352	0	0	9.13769	0	0	8.72682	0	0	10.7897	0
p21-activated protein kinase-interacting protein 1 (PAK/PLC-interacting protein 1) (hPIP1) (PAK1-interacting protein 1) (WD repeat-containing protein 84)	PAK1IP1	0	0	0	0	0	0	0	0	0	0	0	0	0	0	0	0	0	0	0	0	9.03921	0	7.61003	0	0	8.48546	0	0	0	7.3997	0	0	0	0	0	0	0	0	0	0	0	0	0	0	0	0	0	0
InaD-like protein (Inadl protein) (hINADL) (Channel-interacting PDZ domain-containing protein) (Pals1-associated tight junction protein) (Protein associated to tight junctions)	PATJ	0	0	0	0	0	0	0	0	10.236	0	0	7.46134	0	0	0	0	0	0	0	0	9.19799	0	0	0	9.05538	8.39488	8.713	0	0	8.87364	0	0	0	0	8.89243	0	0	9.50271	0	8.43849	8.48325	9.49997	0	0	0	0	9.34558	0
WD repeat-containing protein 55	WDR55	0	0	0	0	0	0	0	0	0	0	0	6.92965	0	0	0	0	0	0	0	6.59032	0	0	0	0	0	0	0	0	0	6.98557	0	0	0	6.68107	0	0	6.7721	8.26486	0	0	0	0	0	0	0	0	0	0
Beta-galactoside alpha-2,6-sialyltransferase 1 (Alpha 2,6-ST 1) (EC 2.4.3.1) (B-cell antigen CD75) (CMP-N-acetylneuraminate-beta-galactosamide-alpha-2,6-sialyltransferase 1) (ST6Gal I) (ST6GalI) (Sialyltransferase 1)	ST6GAL1	0	0	0	0	0	0	0	0	0	0	8.26106	0	0	0	0	0	0	9.58235	0	0	0	0	0	0	0	0	7.41124	0	8.0833	0	0	0	7.81131	0	0	9.22201	0	0	10.7599	7.92857	0	0	7.74137	0	9.47862	9.19215	7.59133	9.10165
FGGY carbohydrate kinase domain-containing protein (D-ribulokinase FGGY) (EC 2.7.1.47)	FGGY	0	0	0	6.72338	0	0	0	0	0	0	0	0	0	0	0	0	0	0	0	0	0	0	7.90209	0	0	0	0	0	0	6.63657	0	0	0	7.29914	0	0	0	9.17242	0	0	0	0	0	0	0	0	0	0
Thrombospondin-2	THBS2	0	0	9.79331	12.4551	9.224	10.8431	11.0121	0	0	10.6599	0	0	0	8.62707	0	0	0	0	9.11231	0	0	0	10.6746	10.9788	0	0	0	0	0	11.3207	10.7682	10.4188	0	8.56408	8.50799	0	10.7155	7.98389	0	0	0	7.61467	0	8.95898	0	0	8.70787	0
Multiple coagulation factor deficiency protein 2 (Neural stem cell-derived neuronal survival protein)	MCFD2	7.47354	0	0	0	0	0	0	0	0	0	6.61924	0	0	6.50461	0	0	0	0	0	0	7.83774	0	0	0	0	0	0	0	8.30785	0	0	0	0	0	0	0	0	0	0	0	0	0	7.9427	0	8.55696	0	0	9.98114
tRNA (guanine(10)-N2)-methyltransferase homolog (EC 2.1.1.-) (tRNA guanosine-2'-O-methyltransferase TRM11 homolog)	TRMT11	0	0	0	0	0	0	0	0	0	0	0	0	0	0	0	0	0	0	0	0	0	0	0	0	0	0	0	0	0	0	0	0	0	0	0	0	0	0	0	0	0	0	0	0	0	0	0	0
Replication factor C subunit 4 (Activator 1 37 kDa subunit) (A1 37 kDa subunit) (Activator 1 subunit 4) (Replication factor C 37 kDa subunit) (RF-C 37 kDa subunit) (RFC37)	RFC4	9.17982	0	0	0	0	0	0	0	0	0	9.34338	0	0	0	11.2415	8.61921	0	0	0	0	0	0	0	0	0	0	0	0	9.39108	0	0	0	0	0	0	0	0	0	0	0	0	0	9.74997	0	9.63101	0	9.12599	0
Caspase recruitment domain-containing protein 19 (Bcl10-interacting CARD protein) (BinCARD)	CARD19	0	10.2968	0	0	0	0	0	10.2442	9.54863	0	7.126	0	9.78248	0	0	6.84844	0	8.41931	0	0	0	0	0	0	0	0	0	10.1668	0	0	7.0388	0	7.60324	7.26045	0	0	0	0	0	0	0	0	8.23625	0	8.04968	10.878	7.41395	0
Microtubule-associated protein 2 (MAP-2)	MAP2	8.72667	0	0	0	0	0	7.554	0	0	8.153	0	0	0	0	7.92752	9.20891	12.056	8.09031	7.11109	0	0	0	0	7.81311	0	0	7.06478	10.1278	0	0	7.57135	6.9041	0	0	0	7.01455	8.87257	0	8.69457	0	0	0	0	0	0	8.1354	0	8.26962
Nuclear factor NF-kappa-B p100 subunit (DNA-binding factor KBF2) (H2TF1) (Lymphocyte translocation chromosome 10 protein) (Nuclear factor of kappa light polypeptide gene enhancer in B-cells 2) (Oncogene Lyt-10) (Lyt10) [Cleaved into: Nuclear factor NF-kappa-B p52 subunit]	NFKB2	7.17296	0	0	0	0	0	0	0	0	0	8.36582	0	0	0	0	7.47187	0	0	0	7.80016	0	0	0	0	0	0	0	0	0	0	0	0	0	0	7.90577	0	0	0	0	7.36218	0	0	0	0	0	0	6.65032	0
Charged multivesicular body protein 2b (CHMP2.5) (Chromatin-modifying protein 2b) (CHMP2b) (Vacuolar protein sorting-associated protein 2-2) (Vps2-2) (hVps2-2)	CHMP2B	11.8234	10.9503	0	0	9.91412	0	0	12.0039	10.9287	0	0	10.2641	10.9511	8.89039	11.6532	0	9.91279	11.1049	0	0	11.7911	0	0	0	0	10.1294	9.95838	9.86983	10.037	0	0	0	0	0	0	9.90702	0	10.0867	0	10.0472	0	0	10.9084	9.69055	0	10.3807	9.72083	12.1879
Peptidase inhibitor 16 (PI-16) (Cysteine-rich secretory protein 9) (CRISP-9) (PSP94-binding protein) (CD antigen CD364)	PI16	0	0	9.11811	9.07386	8.36132	8.5965	8.78435	0	0	0	0	7.23895	8.33179	7.72334	0	7.8031	9.33213	0	8.0103	0	0	7.70924	8.79795	10.2468	10.3327	0	10.0094	9.10848	7.90858	7.3191	9.47426	9.06102	7.68174	6.97595	6.056	0	7.79831	8.29209	0	0	12.0898	7.60109	9.21834	9.09053	7.64616	0	7.22329	7.99819
PHD finger protein 10 (BRG1-associated factor 45a) (BAF45a) (XAP135)	PHF10	0	0	0	0	0	0	0	0	0	0	0	8.48509	0	0	0	0	0	0	0	7.39053	0	0	0	0	9.34236	0	0	0	0	0	0	0	9.20935	0	0	0	0	0	0	7.98703	0	0	0	0	0	0	0	0
Pleckstrin homology domain-containing family A member 5 (PH domain-containing family A member 5) (Phosphoinositol 3-phosphate-binding protein 2) (PEPP-2)	PLEKHA5	10.0913	10.0405	0	0	0	0	0	10.6046	10.3301	0	8.23577	0	10.3944	0	10.2076	9.44653	9.68771	9.48646	0	0	8.25092	8.5721	0	0	0	0	0	9.85474	10.295	0	0	0	10.4679	0	0	7.90018	0	0	9.33958	0	0	8.92345	10.8125	0	10.4637	10.3047	9.96772	9.33216
Protein CDV3 homolog	CDV3	8.21886	10.6205	0	9.38712	0	0	0	10.5614	10.0331	0	8.0199	0	10.3035	0	10.8682	8.4912	9.02322	9.16153	0	0	7.23991	8.6353	0	0	9.76289	0	0	9.8012	9.55344	0	0	0	8.90226	0	9.87317	8.42837	0	0	0	6.46755	0	0	8.59803	0	8.53912	9.63477	9.07575	9.1949
Myotubularin-related protein 14 (EC 3.1.3.-) (HCV NS5A-transactivated protein 4 splice variant A-binding protein 1) (NS5ATP4ABP1) (hJumpy)	MTMR14	0	0	0	7.51925	0	9.052	0	0	0	0	0	0	0	7.62228	0	0	0	0	0	0	0	8.75381	8.2476	0	0	0	0	0	0	7.50099	0	0	0	7.37161	8.14062	0	7.54145	0	8.17182	0	0	0	0	0	0	0	0	0
eEF1A lysine and N-terminal methyltransferase (eEF1A-KNMT) (Methyltransferase-like protein 13) [Includes: eEF1A lysine methyltransferase (EC 2.1.1.-); eEF1A N-terminal methyltransferase (EC 2.1.1.-)]	METTL13	0	0	0	0	0	0	0	0	0	0	0	0	0	0	0	0	0	0	8.32683	0	0	0	0	0	0	8.77886	0	8.59528	0	0	0	0	0	0	0	9.78609	0	8.80593	0	0	0	0	0	0	0	0	8.43052	0
ATP synthase subunit a (F-ATPase protein 6)	MT-ATP6	0	0	0	8.79888	0	10.431	8.08918	0	0	9.90441	0	9.78094	0	8.45253	0	0	0	0	0	8.06092	8.85555	9.43777	10.7605	9.86543	10.3579	0	0	8.22853	0	0	9.67716	10.1062	0	9.76422	9.36898	0	9.19789	11.3026	8.59377	8.16574	9.80421	7.86299	0	9.87979	0	7.88539	0	9.25241
Myelin basic protein (MBP) (Myelin A1 protein) (Myelin membrane encephalitogenic protein)	MBP	0	8.88407	0	9.35614	0	0	0	8.54093	7.62592	0	0	0	8.01136	6.6998	9.23623	10.8024	16.1252	7.533	6.94595	0	6.8477	9.26571	0	9.30032	7.4469	0	8.0681	14.866	7.11396	9.01148	7.85121	8.79113	8.72604	0	0	8.87874	0	0	9.63936	0	0	0	8.4574	0	7.18486	7.30768	0	9.26651
Papilin	PAPLN	0	0	0	0	0	0	0	0	0	10.1679	0	0	0	0	9.34773	7.97976	0	7.40137	0	0	0	0	0	7.19747	0	0	0	7.80902	8.58383	0	0	0	6.6895	0	0	7.35772	8.07551	0	0	7.12485	0	10.4494	7.6073	8.46302	8.11025	8.30358	8.09672	8.37258
Pregnancy zone protein (C3 and PZP-like alpha-2-macroglobulin domain-containing protein 6)	PZP	0	0	8.76991	0	8.52809	10.2503	8.18051	0	0	8.3595	0	11.9354	0	8.18335	0	0	0	0	0	0	0	0	0	9.16185	0	0	0	0	0	8.58833	11.2431	10.8193	0	0	9.34917	0	8.59381	0	0	0	0	8.61356	0	9.75694	0	0	0	0
Protein S100-A12 (CGRP) (Calcium-binding protein in amniotic fluid 1) (CAAF1) (Calgranulin-C) (CAGC) (Extracellular newly identified RAGE-binding protein) (EN-RAGE) (Migration inhibitory factor-related protein 6) (MRP-6) (p6) (Neutrophil S100 protein) (S100 calcium-binding protein A12) [Cleaved into: Calcitermin]	S100A12	0	9.76467	0	7.78838	8.91341	0	0	8.08398	0	6.15476	7.03783	6.77471	7.61028	10.8527	8.18627	9.24196	9.37388	8.57592	7.2217	0	0	0	0	7.43322	0	6.30316	0	9.09104	8.72062	7.44285	6.47984	7.70936	8.27955	7.59042	8.78203	8.60053	0	5.69397	0	0	0	0	8.70395	0	8.5985	9.53925	7.47426	7.41006
Ribosomal RNA-processing protein 7 homolog A (Gastric cancer antigen Zg14)	RRP7A	0	0	0	0	0	0	0	0	0	8.55263	0	0	0	7.91742	0	0	0	0	0	0	0	0	0	0	7.58864	8.35583	0	0	0	0	0	0	0	0	6.4935	0	0	0	8.39595	0	7.37732	7.75293	0	0	0	0	0	8.83802
Serine/threonine-protein kinase PAK 3 (EC 2.7.11.1) (Beta-PAK) (Oligophrenin-3) (p21-activated kinase 3) (PAK-3)	PAK3	0	0	0	0	0	0	0	9.96985	0	0	9.64903	0	0	0	0	0	10.5139	0	0	0	0	0	0	0	7.74883	0	0	9.34832	0	0	0	0	0	0	6.21493	0	0	0	0	8.11791	8.17497	0	8.53495	0	8.36716	0	0	0
Small ribosomal subunit protein mS33 (28S ribosomal protein S33, mitochondrial) (MRP-S33) (S33mt)	MRPS33	8.9086	10.7271	0	0	0	0	0	9.61954	0	0	9.1183	0	9.86523	0	9.3436	8.58359	9.01509	9.29315	0	0	7.64779	0	0	0	8.61098	0	8.84156	9.58889	9.04613	0	0	0	0	7.04834	0	8.86989	0	0	8.57447	0	0	0	9.09837	0	8.67226	8.80585	8.28792	9.53297
UDP-GlcNAc:betaGal beta-1,3-N-acetylglucosaminyltransferase 9 (BGnT-9) (Beta-1,3-Gn-T9) (Beta-1,3-N-acetylglucosaminyltransferase 9) (Beta3Gn-T9) (EC 2.4.1.-)	B3GNT9	0	0	0	0	0	0	0	0	0	0	0	0	0	0	0	0	0	0	0	0	0	0	0	0	7.69674	7.71903	7.57203	0	0	0	0	0	0	0	0	0	0	8.29271	0	6.59162	7.59329	0	0	0	0	0	0	0
RNA polymerase II-associated protein 1	RPAP1	0	0	0	0	0	0	0	0	0	0	0	0	0	0	0	0	7.91415	0	0	0	0	0	0	0	0	0	0	0	0	0	0	0	7.9898	7.05562	0	6.64237	0	0	0	7.65598	0	0	8.09896	0	0	0	8.18966	0
Xaa-Arg dipeptidase (EC 3.4.13.4) (Beta-Ala-Lys dipeptidase)	PM20D2	0	0	6.88283	0	0	7.07392	0	0	0	0	7.80349	0	7.95383	0	0	0	0	0	7.29532	0	0	8.5665	0	7.46365	9.01013	7.6566	9.37561	8.29535	7.44522	0	7.15768	6.31863	0	7.131	0	0	0	7.84888	0	8.25382	9.12032	0	7.40108	7.96843	0	0	0	0
Exosome complex component RRP43 (Exosome component 8) (Opa-interacting protein 2) (OIP-2) (Ribosomal RNA-processing protein 43) (p9)	EXOSC8	9.83224	0	0	0	0	0	9.37495	0	0	0	0	0	0	0	0	0	0	0	0	0	0	0	0	0	8.95461	0	0	0	0	0	0	0	0	0	0	0	0	0	0	7.829	9.32361	0	9.58542	0	0	0	8.37833	0
V-type proton ATPase 116 kDa subunit a 2 (V-ATPase 116 kDa subunit a 2) (Lysosomal H(+)-transporting ATPase V0 subunit a 2) (TJ6) (Vacuolar proton translocating ATPase 116 kDa subunit a isoform 2)	ATP6V0A2	0	0	0	0	0	0	0	10.6379	9.58969	0	0	0	0	0	0	0	0	0	0	6.91754	0	0	8.37576	0	0	9.34129	0	0	0	7.81703	0	0	0	0	0	9.13834	8.28914	0	0	0	0	0	0	0	0	0	0	0
Ubiquitin carboxyl-terminal hydrolase 34 (EC 3.4.19.12) (Deubiquitinating enzyme 34) (Ubiquitin thioesterase 34) (Ubiquitin-specific-processing protease 34)	USP34	0	0	0	0	0	0	0	0	0	0	0	0	0	0	0	0	0	0	0	0	0	0	0	0	0	0	0	0	0	0	0	0	0	7.87773	0	0	0	0	0	0	0	0	0	0	0	0	8.01883	0
Histone-lysine N-methyltransferase EHMT1 (EC 2.1.1.-) (EC 2.1.1.367) (Euchromatic histone-lysine N-methyltransferase 1) (Eu-HMTase1) (G9a-like protein 1) (GLP) (GLP1) (Histone H3-K9 methyltransferase 5) (H3-K9-HMTase 5) (Lysine N-methyltransferase 1D)	EHMT1	0	0	0	0	0	0	0	0	0	8.80431	0	0	0	0	0	0	0	0	0	0	0	0	0	0	0	0	0	0	0	0	0	0	0	0	0	0	7.94908	0	0	0	0	8.88509	0	0	0	0	0	0
Ribonuclease P protein subunit p40 (RNaseP protein p40) (RNase P subunit 1)	RPP40	0	0	0	0	0	0	0	0	0	0	0	0	0	0	0	0	0	0	0	0	0	0	0	0	0	0	0	0	0	0	0	0	0	0	0	0	0	0	0	0	0	0	0	0	0	0	0	0
Serine/threonine-protein kinase B-raf (EC 2.7.11.1) (Proto-oncogene B-Raf) (p94) (v-Raf murine sarcoma viral oncogene homolog B1)	BRAF	0	0	0	0	0	0	0	9.34192	9.72016	0	0	0	0	0	0	0	8.99626	0	0	0	0	0	0	0	0	0	0	10.5908	0	0	0	7.41127	9.20971	0	0	0	0	0	0	0	0	0	8.05688	0	0	0	8.88247	0
HLA class II histocompatibility antigen gamma chain (HLA-DR antigens-associated invariant chain) (Ia antigen-associated invariant chain) (Ii) (CD antigen CD74) [Cleaved into: Class-II-associated invariant chain peptide (CLIP)]	CD74	0	0	0	0	0	0	0	0	0	8.05256	0	0	0	0	0	0	0	0	0	0	8.49764	0	0	0	0	0	0	7.50252	0	0	0	0	0	0	11.3722	0	0	0	0	0	7.63191	8.71344	0	0	0	0	0	0
Cyclin-dependent kinase 9 (EC 2.7.11.22) (EC 2.7.11.23) (C-2K) (Cell division cycle 2-like protein kinase 4) (Cell division protein kinase 9) (Serine/threonine-protein kinase PITALRE) (Tat-associated kinase complex catalytic subunit)	CDK9	0	0	0	0	0	0	0	9.14886	0	0	0	0	0	0	11.226	8.65924	0	0	0	0	6.13899	0	0	0	0	0	8.53256	0	0	0	0	0	0	0	0	0	0	0	0	7.15211	0	0	0	0	0	8.0888	8.06408	0
Ubiquilin-2 (Chap1) (DSK2 homolog) (Protein linking IAP with cytoskeleton 2) (PLIC-2) (hPLIC-2) (Ubiquitin-like product Chap1/Dsk2)	UBQLN2	7.41432	0	0	0	0	0	0	8.37386	8.78769	0	0	0	0	0	8.76114	8.25098	8.9632	0	0	0	0	0	0	0	0	0	9.05487	8.87032	0	0	0	0	7.20267	0	0	8.64813	0	0	0	6.92254	0	0	7.64166	0	8.37355	8.23614	8.00847	0
Protein YIPF2 (YIP1 family member 2)	YIPF2	0	0	0	0	9.01592	8.14754	0	0	0	8.74217	0	0	0	0	0	0	0	0	0	0	9.75525	8.69766	0	0	9.20327	9.08394	0	0	0	0	0	0	0	0	7.1393	0	0	8.50199	8.9947	0	9.22583	0	0	8.86265	0	0	0	9.20537
Upstream stimulatory factor 2 (Class B basic helix-loop-helix protein 12) (bHLHb12) (FOS-interacting protein) (FIP) (Major late transcription factor 2) (Upstream transcription factor 2)	USF2	0	0	0	0	0	0	0	0	0	0	0	0	0	7.83001	0	0	0	0	0	0	0	0	0	0	0	0	0	0	8.86157	7.58594	0	0	0	0	0	0	0	0	0	0	0	0	0	0	0	7.93747	0	0
Neurofilament medium polypeptide (NF-M) (160 kDa neurofilament protein) (Neurofilament 3) (Neurofilament triplet M protein)	NEFM	7.38	0	0	0	0	0	0	0	8.13671	0	8.9429	0	0	7.94556	0	8.24232	12.5304	0	0	0	6.46735	8.10865	0	7.75322	0	0	0	10.6593	7.47276	0	0	0	7.5945	0	0	8.84443	0	0	8.53201	0	6.27094	7.65163	8.04126	0	0	0	7.71264	0
Neutrophil cytosol factor 2 (NCF-2) (67 kDa neutrophil oxidase factor) (NADPH oxidase activator 2) (Neutrophil NADPH oxidase factor 2) (p67-phox)	NCF2	0	0	0	9.33581	9.49102	8.49817	0	0	0	0	0	9.05678	0	8.26922	0	0	0	0	0	0	8.54853	9.77255	9.02909	8.67567	9.67129	0	8.19393	0	0	8.56299	9.07143	9.2945	0	8.9622	9.84033	0	7.77315	9.02975	0	9.61847	9.31646	9.43951	0	9.73976	0	0	0	0
Septin-7 (CDC10 protein homolog)	SEPTIN7	0	8.91824	0	0	0	0	7.82033	8.7096	7.02375	0	0	0	8.93643	0	8.99082	8.20689	0	8.53204	0	0	8.55114	0	7.3767	0	0	0	0	0	8.61407	0	6.9218	7.79088	9.16148	0	0	0	7.31776	0	0	8.56278	8.61298	0	9.3479	7.0361	9.26679	9.37491	8.40146	0
Integrator complex subunit 4 (Int4)	INTS4	0	0	0	0	0	0	0	0	0	0	0	0	0	0	0	0	0	0	0	0	0	0	0	0	0	0	0	0	0	0	0	0	0	7.88831	0	0	7.45502	0	0	6.20283	0	0	0	0	0	0	0	0
Palmitoyltransferase ZDHHC5 (EC 2.3.1.225) (Zinc finger DHHC domain-containing protein 5) (DHHC-5) (Zinc finger protein 375)	ZDHHC5	0	0	0	0	0	0	0	0	0	0	0	0	0	0	0	0	9.62428	9.95403	0	0	0	0	0	0	9.58918	0	8.94339	0	8.41766	8.82836	0	0	0	0	0	9.58485	0	0	10.7035	9.94484	9.87788	0	10.5849	0	9.08731	9.25045	0	10.9725
Activating signal cointegrator 1 complex subunit 2 (ASC-1 complex subunit p100) (Trip4 complex subunit p100)	ASCC2	0	0	0	0	0	8.91134	0	0	0	0	0	0	10.8698	0	0	0	0	0	0	0	0	0	0	0	0	0	0	0	7.51338	7.75104	0	0	0	0	8.91528	7.4391	8.73897	9.43886	9.64772	0	9.27162	9.14098	0	0	0	0	0	0
Transmembrane protein 168	TMEM168	0	0	0	0	0	0	0	0	0	0	0	6.98872	0	0	0	0	0	0	0	0	0	0	0	0	0	0	0	0	0	8.22905	0	0	0	0	7.50337	0	9.54087	10.1238	0	0	0	0	0	0	0	0	0	0
VWFA and cache domain-containing protein 1 (Cache domain-containing protein 1)	CACHD1	0	10.3068	0	0	0	0	0	11.6523	0	0	7.79293	0	0	0	10.744	9.57741	8.08095	8.29539	0	0	0	0	0	0	0	0	0	9.68332	0	0	0	0	7.28722	0	0	8.43356	7.54452	0	8.49024	0	0	0	0	0	8.18354	0	0	0
Tapasin-related protein (TAPASIN-R) (TAP-binding protein-like) (TAP-binding protein-related protein) (TAPBP-R) (Tapasin-like)	TAPBPL	0	0	0	0	8.88076	9.82232	10.1983	0	0	0	0	0	0	0	0	0	0	0	0	0	0	0	9.02387	8.86839	9.72328	8.80145	0	0	9.503	7.55506	9.5966	0	0	0	9.03539	0	0	9.00972	0	0	0	0	0	10.2237	0	0	0	9.84177
F-box/LRR-repeat protein 18 (F-box and leucine-rich repeat protein 18)	FBXL18	0	0	0	0	0	0	0	0	0	0	0	0	0	0	0	0	0	0	0	0	0	0	0	0	0	0	0	0	0	0	0	0	0	0	0	0	0	0	0	0	0	0	0	0	0	0	0	0
Syntaxin-binding protein 2 (Protein unc-18 homolog 2) (Unc18-2) (Protein unc-18 homolog B) (Unc-18B)	STXBP2	0	9.69999	10.0858	7.6121	9.51567	9.74968	0	0	9.01797	0	9.35849	8.18346	9.77834	9.6666	10.0339	9.16044	8.38641	0	9.29394	9.61244	0	8.67714	0	8.1843	8.37133	0	0	0	0	9.36416	7.99618	9.07058	0	0	10.4214	9.95198	7.99323	0	8.94149	0	9.24267	8.82873	9.03158	9.55066	0	10.8644	0	10.0537
Testis-specific Y-encoded-like protein 5 (TSPY-like protein 5)	TSPYL5	6.2119	0	0	0	0	0	0	0	0	0	7.52544	0	0	0	9.94402	6.16207	0	8.54687	0	0	6.91555	0	0	0	0	0	8.09084	0	8.25635	0	0	0	8.72511	6.57949	0	0	0	0	0	6.31021	0	0	8.36805	0	0	6.68809	0	9.70473
Chloride intracellular channel protein 2 (XAP121)	CLIC2	8.8051	0	8.08728	8.00277	0	8.1735	0	0	9.79485	0	9.42133	8.33861	9.84624	0	9.90943	9.57285	0	8.92006	8.8891	7.77048	0	0	0	0	0	0	0	0	9.20659	0	0	0	8.23807	0	7.86902	0	0	0	9.99769	8.94949	0	9.49292	9.3005	0	9.47057	10.3118	9.53872	0
Menin	MEN1	0	0	0	0	0	0	0	0	10.9691	0	0	0	0	0	0	0	0	0	0	0	0	0	0	0	0	0	0	0	0	0	0	0	7.99284	0	0	0	0	0	0	0	0	0	0	0	8.24837	0	0	0
UDP-glucuronosyltransferase 3A2 (UDPGT 3A2) (EC 2.4.1.17)	UGT3A2	0	0	0	0	8.0419	6.53925	0	0	0	0	0	0	0	0	0	0	0	0	7.77462	0	0	0	0	7.27372	0	0	0	7.12343	9.54711	0	6.38218	6.75744	8.90723	0	0	0	0	0	7.62065	0	7.42269	0	9.04815	6.9681	8.04035	9.37511	0	9.51745
NADH dehydrogenase [ubiquinone] 1 alpha subcomplex assembly factor 3	NDUFAF3	0	0	0	0	0	0	0	0	0	0	0	7.93564	0	0	0	0	0	0	0	0	9.40693	0	0	0	0	0	0	0	0	0	8.72027	0	0	9.81036	0	8.94679	9.29824	10.0893	0	10.1294	10.1092	0	0	0	0	0	0	0
Centrin-3	CETN3	0	0	0	0	0	0	8.15614	0	0	0	0	0	0	7.46944	0	0	0	0	0	0	0	0	0	0	7.10933	0	0	0	0	0	0	0	0	0	0	0	7.24406	0	8.05118	0	7.82326	7.93606	0	0	0	0	0	0
Zinc finger protein 787 (TTF-I-interacting peptide 20)	ZNF787	0	0	0	0	0	0	0	0	0	9.73602	0	0	0	7.24474	10.9129	0	0	8.32379	0	0	9.83793	0	0	0	9.4963	10.4996	0	0	0	0	0	0	10.3083	0	0	0	0	0	0	0	0	0	8.30345	0	0	8.38874	0	10.8091
Mitochondrial inner membrane protein OXA1L (Hsa) (OXA1Hs) (Oxidase assembly 1-like protein) (OXA1-like protein)	OXA1L	0	0	0	0	0	0	0	0	0	0	0	0	0	0	0	0	0	0	0	0	7.43218	0	0	0	0	0	0	0	0	0	0	0	0	0	0	0	0	0	0	0	0	0	8.71755	0	8.40356	0	7.33807	0
Ethanolaminephosphotransferase 1 (hEPT1) (EC 2.7.8.1) (Selenoprotein I) (SelI)	SELENOI	0	0	0	0	8.93213	0	0	0	0	0	0	0	0	0	0	8.57419	9.55598	0	0	0	0	0	0	0	8.93818	10.044	0	0	0	6.97923	0	0	7.78902	8.45765	6.17459	8.24074	0	8.92263	9.81219	0	8.9051	9.53429	0	9.19525	0	0	8.31169	9.6933
Teneurin-2 (Ten-2) (Protein Odd Oz/ten-m homolog 2) (Tenascin-M2) (Ten-m2) (Teneurin transmembrane protein 2) [Cleaved into: Ten-2, soluble form; Ten-2 intracellular domain (Ten-2 ICD)]	TENM2	0	0	0	0	0	0	0	9.28067	10.499	10.0101	10.0175	9.3264	0	0	0	0	8.13623	0	0	0	0	0	0	0	8.92694	8.95254	8.68011	0	8.51878	0	0	0	9.8355	0	8.24195	8.3144	0	8.95932	0	7.49365	9.48627	8.75521	0	0	0	0	9.05325	10.0855
Sarcoplasmic/endoplasmic reticulum calcium ATPase 3 (SERCA3) (SR Ca(2+)-ATPase 3) (EC 7.2.2.10) (Calcium pump 3)	ATP2A3	0	0	9.18182	9.94055	11.2184	11.1552	9.38055	0	0	9.00556	8.35381	0	0	12.5641	0	9.86808	7.8765	0	9.6666	8.30539	0	10.1085	9.59446	10.0666	0	8.27847	0	8.43225	0	9.016	10.14	10.3275	0	10.1153	7.05199	0	11.0434	9.97513	0	8.75457	0	10.8665	0	10.3777	8.12213	0	7.85005	11.3664
Protein EVI2B (Ecotropic viral integration site 2B protein homolog) (EVI-2B) (CD antigen CD361)	EVI2B	0	0	0	0	9.84161	0	8.57592	0	0	0	0	0	0	0	0	0	0	0	0	0	0	0	0	0	9.1591	0	0	0	0	0	0	0	0	0	8.93903	0	0	9.73388	0	0	0	9.75717	0	0	0	0	0	0
Guanine nucleotide-binding protein subunit beta-5 (Gbeta5) (Transducin beta chain 5)	GNB5	0	0	0	0	0	0	0	0	0	0	0	0	0	0	0	8.76775	10.7854	0	0	0	0	8.76836	0	0	0	0	8.31297	0	0	0	0	7.77679	0	0	0	0	0	8.84546	8.36729	0	8.95823	0	0	0	0	0	0	0
E3 ubiquitin-protein ligase makorin-2 (EC 2.3.2.27) (RING finger protein 62) (RING-type E3 ubiquitin transferase makorin-2)	MKRN2	0	0	0	0	0	0	0	0	0	0	0	0	0	0	0	0	0	0	0	0	7.77334	0	0	0	0	0	0	0	0	0	0	0	7.65536	0	7.4767	0	0	0	0	0	9.43781	0	0	0	7.1559	0	0	0
Thrombomodulin (TM) (Fetomodulin) (CD antigen CD141)	THBD	0	0	0	0	8.23191	0	0	0	0	0	0	0	0	0	0	0	0	0	0	0	0	0	9.16531	0	0	0	0	0	0	0	0	8.35773	0	0	0	0	0	0	0	0	0	9.44128	0	0	8.42009	0	0	8.73154
Alpha-1,6-mannosylglycoprotein 6-beta-N-acetylglucosaminyltransferase A (EC 2.4.1.155) (Alpha-mannoside beta-1,6-N-acetylglucosaminyltransferase V) (GlcNAc-T V) (GNT-V) (Mannoside acetylglucosaminyltransferase 5) (N-acetylglucosaminyl-transferase V) [Cleaved into: Secreted alpha-1,6-mannosylglycoprotein 6-beta-N-acetylglucosaminyltransferase A (Secreted beta-1,6-N-acetylglucosaminyltransferase V)…	MGAT5	0	0	0	0	0	0	0	0	0	0	0	0	0	0	0	0	0	0	0	0	0	0	0	0	0	0	0	0	0	0	0	0	0	0	0	0	7.95238	0	0	0	0	0	0	0	0	0	0	0
E3 ubiquitin-protein ligase Praja-2 (Praja2) (EC 2.3.2.27) (RING finger protein 131) (RING-type E3 ubiquitin transferase Praja-2)	PJA2	0	0	0	0	0	0	0	0	0	0	0	0	0	0	0	0	0	0	0	0	0	0	0	0	0	0	0	0	0	0	0	0	0	0	0	0	0	8.63767	0	0	0	0	0	0	0	0	0	9.6865
DnaJ homolog subfamily C member 1 (DnaJ protein homolog MTJ1)	DNAJC1	0	0	0	0	0	0	0	10.7011	0	0	0	0	0	0	9.94472	0	0	0	9.87046	7.60279	0	8.57576	0	0	7.11679	8.81746	8.12277	8.68454	8.83264	0	0	0	9.62295	0	0	0	0	0	9.17473	9.55683	9.23876	0	0	8.6845	0	9.14106	0	9.84866
Forkhead box protein O1 (Forkhead box protein O1A) (Forkhead in rhabdomyosarcoma)	FOXO1	0	0	0	0	0	0	0	0	0	0	0	0	0	0	0	0	0	0	0	0	0	0	0	0	0	0	0	8.88485	0	0	0	0	0	0	0	0	0	0	0	0	0	0	0	0	0	0	0	0
V-type proton ATPase subunit G 1 (V-ATPase subunit G 1) (V-ATPase 13 kDa subunit 1) (Vacuolar proton pump subunit G 1) (Vacuolar proton pump subunit M16)	ATP6V1G1	0	11.1979	0	0	0	0	0	11.5778	0	0	10.2256	0	10.4843	10.7507	0	12.1439	10.1475	10.6166	10.0422	0	8.60832	0	0	0	0	0	0	11.3144	10.3788	0	0	0	9.61188	8.91868	0	9.29182	0	0	0	8.1328	0	0	10.4104	0	9.83673	0	10.5576	9.91688
Extracellular matrix protein 1 (Secretory component p85)	ECM1	0	0	8.92823	9.5239	9.8128	9.19403	8.4974	0	0	0	0	8.29027	0	12.1517	9.36001	0	0	0	8.95414	0	6.88102	0	8.31934	9.36695	0	0	0	0	0	0	8.47535	10.351	0	7.77422	8.63026	0	10.6949	0	0	0	0	9.34118	0	8.73553	0	0	0	0
ATP-dependent zinc metalloprotease YME1L1 (EC 3.4.24.-) (ATP-dependent metalloprotease FtsH1) (Meg-4) (Presenilin-associated metalloprotease) (PAMP) (YME1-like protein 1)	YME1L1	0	0	0	0	0	0	0	0	0	0	0	0	0	0	0	0	8.13112	0	0	0	8.77741	0	0	0	0	0	0	0	0	0	0	0	0	0	0	0	0	0	0	8.81285	0	6.92329	0	0	0	0	0	8.97981
STARD3 N-terminal-like protein (MLN64 N-terminal domain homolog)	STARD3NL	0	0	0	0	0	0	0	0	0	9.75546	0	0	0	0	0	0	6.56661	6.6768	0	0	0	0	0	7.00774	0	0	7.18142	0	0	8.0597	0	0	0	0	0	0	0	11.2491	0	7.02446	0	0	7.16803	0	0	0	0	11.2022
Blood group Rh(CE) polypeptide (Rh polypeptide 1) (RhPI) (Rh30A) (RhIXB) (Rhesus C/E antigens) (CD antigen CD240CE)	RHCE	0	0	9.48284	10.5787	12.6015	11.7347	9.4849	0	0	7.76476	0	11.1486	0	9.66363	0	0	0	0	9.22977	7.82922	0	9.37123	10.2088	10.2958	0	7.23366	0	0	0	0	9.5578	11.4462	0	9.71143	7.20814	0	9.08928	7.8902	0	0	6.61698	9.44033	0	10.002	0	0	0	7.02023
Headcase protein homolog (hHDC)	HECA	0	0	0	0	0	0	0	0	0	0	9.0694	0	11.0405	0	10.8732	8.67269	8.98434	8.65968	0	0	0	0	7.74268	0	0	0	0	10.3858	9.10487	0	0	7.90853	8.58132	0	0	8.59128	8.54161	10.5006	0	0	0	0	8.7135	0	8.99591	9.28591	8.75392	11.01
Beta-enolase (EC 4.2.1.11) (2-phospho-D-glycerate hydro-lyase) (Enolase 3) (Muscle-specific enolase) (MSE) (Skeletal muscle enolase)	ENO3	0	0	10.8609	0	9.92893	0	0	0	0	0	0	0	0	0	0	0	8.63815	0	10.0395	0	10.4152	0	0	0	0	0	0	0	0	0	0	0	0	0	0	0	0	0	0	0	0	0	8.16866	9.8357	0	0	0	0
ATP-dependent RNA helicase DHX8 (EC 3.6.4.13) (DEAH box protein 8) (RNA helicase HRH1)	DHX8	0	0	7.34469	0	0	0	0	0	0	0	0	0	0	0	0	0	0	0	0	0	0	0	0	0	0	0	0	0	0	0	0	0	0	0	0	0	6.98437	0	0	0	0	0	0	0	0	0	0	0
Adenosine 3'-phospho 5'-phosphosulfate transporter 1 (PAPS transporter 1) (Putative MAPK-activating protein PM15) (Putative NF-kappa-B-activating protein 48) (Solute carrier family 35 member B2)	SLC35B2	0	0	0	0	0	0	0	0	0	9.8249	0	8.84376	0	0	0	0	0	0	0	8.53069	0	10.2383	0	0	0	10.8832	0	0	0	9.76371	8.52097	0	0	0	8.1701	0	8.72485	10.6775	0	10.1494	9.82816	9.7434	0	10.1865	0	0	0	0
Nucleolar pre-ribosomal-associated protein 1 (Nucleolar protein 254 kDa) (URB1 ribosome biogenesis 1 homolog)	URB1	0	0	0	0	0	0	0	0	0	9.74601	0	0	0	0	0	0	0	0	0	0	0	0	0	0	0	0	0	0	0	0	0	0	0	7.24346	0	0	0	0	0	0	0	0	0	8.62395	0	0	0	0
RING-type E3 ubiquitin-protein ligase PPIL2 (EC 2.3.2.27) (CYC4) (Cyclophilin-60) (Cyclophilin-like protein Cyp-60) (Cyp60) (hCyP-60) (Probable inactive peptidyl-prolyl cis-trans isomerase-like 2) (PPIase) (Rotamase PPIL2)	PPIL2	0	0	0	0	0	0	0	0	0	0	0	0	0	0	0	0	0	0	0	0	0	0	0	8.31754	0	0	0	0	0	0	0	0	0	8.16398	0	0	0	10.1174	8.64739	0	0	0	0	0	0	0	0	10.2741
DNA polymerase beta (EC 2.7.7.7) (5'-deoxyribose-phosphate lyase) (5'-dRP lyase) (EC 4.2.99.-) (AP lyase) (EC 4.2.99.18)	POLB	0	10.3137	0	0	0	0	0	9.7178	10.2187	0	0	0	9.98787	0	0	0	7.03142	8.49773	0	0	8.31189	0	0	0	0	9.43734	0	0	0	0	0	0	8.98633	8.30589	0	9.36543	8.30618	0	0	0	0	0	9.6855	9.1943	9.01682	8.80256	0	10.2533
8-oxo-dGDP phosphatase NUDT18 (EC 3.6.1.58) (2-hydroxy-dADP phosphatase) (7,8-dihydro-8-oxoguanine phosphatase) (MutT homolog 3) (Nucleoside diphosphate-linked moiety X motif 18) (Nudix motif 18)	NUDT18	0	0	0	0	0	0	0	0	0	0	0	0	10.1777	0	0	0	0	0	0	0	0	0	0	0	9.52931	9.55479	0	9.80291	0	0	0	7.96049	0	0	0	8.53644	0	0	0	8.40055	9.41172	0	7.7526	0	8.99102	0	9.07667	0
Peptidyl-prolyl cis-trans isomerase FKBP11 (PPIase FKBP11) (EC 5.2.1.8) (19 kDa FK506-binding protein) (19 kDa FKBP) (FKBP-19) (FK506-binding protein 11) (FKBP-11) (Rotamase)	FKBP11	0	0	0	0	8.46564	0	0	0	10.137	9.77996	0	0	8.72345	0	0	0	0	8.8217	0	7.28206	10.5883	9.42844	0	0	9.7838	10.9397	9.67906	0	0	8.41344	9.16777	0	0	0	8.42455	11.0958	9.4202	8.71434	0	0	9.59089	8.64546	0	0	0	9.39531	0	0
WASH complex subunit 1 (CXYorf1-like protein on chromosome 9) (Protein FAM39E) (WAS protein family homolog 1)	WASHC1	0	0	0	0	0	0	0	0	0	0	8.38158	0	8.2519	0	0	0	0	0	0	6.70827	7.69085	0	0	0	8.09986	7.47642	0	8.31817	0	6.21817	0	0	8.95085	8.02457	9.77379	8.39852	0	0	7.34517	8.51079	8.45966	0	0	0	10.6375	8.78874	0	0
Glyceraldehyde-3-phosphate dehydrogenase (GAPDH) (EC 1.2.1.12) (Peptidyl-cysteine S-nitrosylase GAPDH) (EC 2.6.99.-)	GAPDH	0	8.09528	0	0	8.26198	0	7.07342	8.47149	0	0	0	9.03758	9.50709	8.87304	0	8.56713	0	0	0	7.34201	11.0049	9.17587	8.07224	0	8.6296	7.9943	0	8.19045	8.47393	0	9.3958	0	0	9.89025	7.87696	0	7.91207	9.29244	7.92177	0	9.39915	8.3784	0	7.99127	10.5553	9.72315	0	0
Probable ATP-dependent RNA helicase DHX37 (EC 3.6.4.13) (DEAH box protein 37)	DHX37	0	0	0	0	0	0	0	0	0	0	0	0	0	0	0	0	0	0	0	0	7.86348	0	0	0	0	0	0	0	0	0	7.04393	0	0	0	0	0	0	0	0	0	0	11.8666	0	0	0	0	0	0
TOM1-like protein 2 (Target of Myb-like protein 2)	TOM1L2	9.18809	11.7007	0	9.40738	0	0	0	0	0	0	9.26677	0	0	0	11.7505	9.14992	9.87529	10.0431	0	0	0	0	0	0	0	0	0	11.0951	9.63397	0	0	0	9.96855	8.45187	0	0	9.04688	0	0	0	0	0	0	8.23072	0	9.84422	0	10.6752
Kynurenine--oxoglutarate transaminase 1 (EC 2.6.1.7) (Cysteine-S-conjugate beta-lyase) (EC 4.4.1.13) (Glutamine transaminase K) (GTK) (Glutamine--phenylpyruvate transaminase) (EC 2.6.1.64) (Kynurenine aminotransferase 1) (Kynurenine aminotransferase I) (KATI) (Kynurenine--oxoglutarate transaminase I)	KYAT1	0	9.26561	0	0	0	0	0	0	0	0	0	0	0	0	0	7.60128	10.2137	0	0	0	0	0	7.20158	0	0	0	8.74098	0	8.39899	0	7.37905	7.7514	8.4917	0	0	0	0	0	0	0	0	0	7.95138	0	0	7.91096	7.24294	10.1883
Chromodomain-helicase-DNA-binding protein 2 (CHD-2) (EC 3.6.4.12) (ATP-dependent helicase CHD2)	CHD2	0	0	0	0	0	0	0	10.6044	10.6256	9.93369	10.6436	8.23905	10.2487	0	10.9789	10.0913	0	10.0796	0	0	9.13978	0	8.45485	0	0	0	9.52091	10.9439	0	10.2528	0	0	10.3062	0	10.4862	9.88011	9.05708	10.5356	0	0	0	0	0	0	10.5007	9.99062	0	10.6535
ERI1 exoribonuclease 3 (EC 3.1.-.-) (Prion interactor 1) (Prion protein-interacting protein)	ERI3	8.63653	0	0	0	0	0	0	9.91487	9.75387	0	0	0	9.95409	0	10.4022	8.87778	9.94253	0	0	0	0	0	0	9.03706	0	0	0	0	8.4006	8.5885	9.49728	0	8.74012	9.37429	7.87474	8.74454	0	0	0	10.2329	9.46438	0	7.97989	8.81574	7.74118	9.28144	8.5501	0
Bardet-Biedl syndrome 1 protein (BBS2-like protein 2)	BBS1	0	0	0	0	0	0	0	0	0	0	0	0	0	0	0	9.3089	0	0	0	0	0	0	0	0	8.84531	8.42478	8.48118	0	0	0	0	0	10.0006	0	0	0	0	8.84045	0	8.22249	0	10.3556	9.52243	0	0	0	8.38879	0
DNA-directed RNA polymerase III subunit RPC1 (RNA polymerase III subunit C1) (EC 2.7.7.6) (DNA-directed RNA polymerase III largest subunit) (DNA-directed RNA polymerase III subunit A) (RNA polymerase III 155 kDa subunit) (RPC155) (RNA polymerase III subunit C160)	POLR3A	0	0	0	0	0	0	0	0	0	0	0	0	0	0	8.02367	0	0	0	0	0	0	0	0	0	0	0	0	0	0	0	0	0	0	6.72192	0	0	0	0	0	6.49074	0	8.73647	0	0	0	0	0	0
Rho GTPase-activating protein 24 (Filamin-A-associated RhoGAP) (FilGAP) (RAC1- and CDC42-specific GTPase-activating protein of 72 kDa) (RC-GAP72) (Rho-type GTPase-activating protein 24) (RhoGAP of 73 kDa) (Sarcoma antigen NY-SAR-88) (p73RhoGAP)	ARHGAP24	0	0	0	0	0	0	0	0	0	0	0	7.90776	0	0	0	0	0	0	0	0	0	0	0	0	0	0	0	0	0	0	7.69373	0	0	0	0	0	0	0	0	0	0	0	0	0	0	0	7.5571	12.4064
Selenide, water dikinase 2 (EC 2.7.9.3) (Selenium donor protein 2) (Selenophosphate synthase 2)	SEPHS2	0	0	0	0	0	0	0	0	0	0	0	0	0	0	0	0	0	0	0	0	0	0	0	0	0	0	7.04032	0	6.76727	0	0	0	0	0	0	7.93293	0	0	0	0	0	0	0	0	6.29092	6.9073	7.4787	0
DmX-like protein 1 (X-like 1 protein)	DMXL1	0	0	0	0	0	0	0	0	0	0	0	0	0	0	0	0	0	0	0	0	0	0	6.25683	0	0	0	0	0	0	0	0	7.80122	0	0	0	0	0	0	0	0	0	0	0	0	0	0	0	0
Lymphocyte-specific protein 1 (47 kDa actin-binding protein) (52 kDa phosphoprotein) (pp52) (Lymphocyte-specific antigen WP34)	LSP1	10.3302	0	0	0	7.86641	0	7.4689	7.72028	7.55986	8.54075	0	7.76751	0	7.99184	0	8.60133	0	0	0	0	0	0	0	0	7.93021	6.17299	0	7.63407	9.14349	0	7.31537	7.30664	0	0	7.87885	7.64972	0	6.29707	8.73829	6.03673	6.77385	8.87233	5.88429	6.36786	0	0	8.68706	0
WD repeat-containing protein 75 (U3 small nucleolar RNA-associated protein 17 homolog)	WDR75	0	0	0	0	0	0	0	0	0	9.81002	0	0	0	0	0	0	0	0	0	0	0	9.58764	0	0	0	7.39309	0	0	0	0	0	0	0	0	7.44147	0	0	9.34603	0	9.14949	0	9.51067	0	7.37788	0	0	0	0
Chitinase-3-like protein 1 (39 kDa synovial protein) (Cartilage glycoprotein 39) (CGP-39) (GP-39) (hCGP-39) (YKL-40)	CHI3L1	0	0	7.98928	8.73279	8.12538	9.09393	0	0	0	0	0	7.75022	0	10.443	9.47052	10.5848	9.83319	0	9.15904	0	0	0	9.04753	0	0	0	0	0	0	0	8.90788	9.18456	0	0	8.67505	0	9.09406	0	0	7.62388	0	0	0	8.81533	0	0	0	0
N-chimaerin (A-chimaerin) (Alpha-chimerin) (N-chimerin) (NC) (Rho GTPase-activating protein 2)	CHN1	0	10.6812	0	0	0	0	0	10.7917	9.47759	0	10.3589	0	9.75987	0	0	0	8.60072	9.61596	0	0	0	0	0	0	9.44336	0	0	10.397	8.55622	0	9.00357	0	8.94694	8.56892	0	0	0	0	9.40589	8.07467	0	0	10.5895	9.70664	9.66481	8.93961	9.12055	9.8891
Mitochondrial import inner membrane translocase subunit Tim29 (TIM29)	TIMM29	8.49645	11.3395	0	0	0	0	0	0	0	0	8.67676	0	10.7863	0	10.598	0	9.16016	10.0738	0	0	8.99771	0	0	0	0	0	0	10.6207	0	0	0	0	9.05279	7.59645	0	0	7.44072	0	9.72522	0	0	0	0	0	9.37857	8.79942	7.79492	10.2592
Cullin-associated NEDD8-dissociated protein 2 (Cullin-associated and neddylation-dissociated protein 2) (Epididymis tissue protein Li 169) (TBP-interacting protein of 120 kDa B) (TBP-interacting protein 120B) (p120 CAND2)	CAND2	0	0	0	0	0	7.50597	0	0	0	0	0	0	0	0	0	0	0	0	0	6.9171	0	0	8.38487	8.66764	0	8.68628	0	0	0	7.92958	8.06646	8.22564	0	10.3896	6.21662	0	0	0	0	8.5122	0	0	0	0	9.00282	0	0	0
3'-5' RNA helicase YTHDC2 (EC 3.6.4.13) (YTH domain-containing protein 2) (hYTHDC2)	YTHDC2	0	0	0	0	0	0	0	0	0	0	0	0	0	0	0	0	0	0	0	6.74193	0	0	0	0	0	0	0	0	0	0	8.17485	0	0	0	0	0	8.50778	0	0	0	0	0	0	0	0	0	0	0
Archaemetzincin-2 (EC 3.4.-.-) (Archeobacterial metalloproteinase-like protein 2)	AMZ2	0	0	0	0	0	0	0	0	0	0	0	0	0	7.17799	0	0	0	0	7.45359	0	0	0	0	7.23845	0	0	0	0	0	0	0	0	0	0	0	0	7.82449	0	0	0	0	0	0	0	0	0	0	0
Matrix metalloproteinase-9 (MMP-9) (EC 3.4.24.35) (92 kDa gelatinase) (92 kDa type IV collagenase) (Gelatinase B) (GELB) [Cleaved into: 67 kDa matrix metalloproteinase-9; 82 kDa matrix metalloproteinase-9]	MMP9	0	7.11382	9.46329	9.87788	10.0682	10.0057	8.07003	0	0	8.15828	0	10.7586	6.57352	12.1893	0	6.05713	9.31262	8.60699	10.1779	9.53681	0	9.98652	9.67529	9.77833	0	7.77856	0	9.62758	0	7.79055	9.33612	10.551	0	8.40901	8.8683	0	9.63681	7.32621	0	8.70471	0	9.68317	0	9.94697	8.32931	0	5.92474	8.49103
Nucleosome assembly protein 1-like 5 (Down-regulated in liver malignancy)	NAP1L5	0	6.64068	0	0	0	0	0	0	7.98287	0	0	8.06081	7.39427	0	7.502	0	9.88615	8.67213	0	7.19466	0	0	0	0	0	6.9603	9.52865	7.89251	8.62319	8.87808	0	0	7.33654	0	0	0	0	7.58292	0	9.78547	0	0	0	0	7.38188	7.06331	9.84857	0
Nuclear factor 1 B-type (NF1-B) (Nuclear factor 1/B) (CCAAT-box-binding transcription factor) (CTF) (Nuclear factor I/B) (NF-I/B) (NFI-B) (TGGCA-binding protein)	NFIB	0	0	0	0	0	0	9.91716	0	0	9.6743	0	0	0	0	10.4679	9.05435	0	0	8.04551	9.89188	9.59273	0	9.4901	0	9.41279	9.54099	0	0	0	10.0783	0	8.98567	0	0	8.51376	0	8.74482	0	8.67298	0	0	9.12981	0	9.52605	0	0	0	9.88068
Ataxin-3 (EC 3.4.19.12) (Machado-Joseph disease protein 1) (Spinocerebellar ataxia type 3 protein)	ATXN3	0	0	0	0	0	0	0	0	0	0	7.60322	0	0	7.93555	0	0	0	0	0	0	0	0	7.0515	0	0	0	0	0	9.16598	0	0	7.36047	0	8.13958	0	0	0	0	0	0	0	0	7.48155	0	8.48084	8.21598	7.9774	0
DnaJ homolog subfamily B member 12	DNAJB12	10.3396	0	0	0	0	0	0	10.0632	0	9.86206	0	0	0	0	10.7058	9.82314	9.4341	8.72221	0	0	7.56668	0	0	8.0923	9.47356	0	10.0294	0	9.32863	0	8.27099	0	10.6677	0	0	0	0	8.57573	9.98396	7.55637	0	9.44523	10.2389	0	8.37582	0	8.90189	11.7439
Histone-lysine N-methyltransferase EHMT2 (EC 2.1.1.-) (EC 2.1.1.367) (Euchromatic histone-lysine N-methyltransferase 2) (HLA-B-associated transcript 8) (Histone H3-K9 methyltransferase 3) (H3-K9-HMTase 3) (Lysine N-methyltransferase 1C) (Protein G9a)	EHMT2	0	0	0	0	0	0	0	0	0	0	0	0	8.65791	0	10.0041	0	0	7.57165	0	0	0	0	0	0	0	0	0	8.56066	7.47968	0	0	0	7.75277	0	0	0	0	0	0	0	0	0	8.36434	0	8.35216	0	7.3477	9.40358
C2 domain-containing protein 5 (C2 domain-containing phosphoprotein of 138 kDa)	C2CD5	0	0	0	0	0	0	10.0478	0	0	10.2649	0	7.38206	0	7.91989	0	0	0	0	10.1043	7.15978	0	0	0	0	8.82941	9.94179	0	0	0	8.19824	9.331	0	0	0	7.92286	0	8.96083	10.0768	9.97876	9.55086	0	10.0955	0	9.83391	0	0	0	0
Protein arginine N-methyltransferase 9 (Protein arginine N-methyltransferase 10) (EC 2.1.1.320)	PRMT9	0	0	0	0	0	0	0	0	0	0	0	0	0	0	0	0	0	0	0	0	0	0	0	0	0	0	0	0	0	0	0	0	0	0	0	0	0	0	0	0	0	0	0	0	0	0	0	0
High affinity cAMP-specific and IBMX-insensitive 3',5'-cyclic phosphodiesterase 8A (EC 3.1.4.53)	PDE8A	0	0	0	0	0	0	0	0	0	0	0	0	0	0	0	0	0	0	0	0	0	0	0	0	0	0	0	0	0	0	0	0	0	0	0	0	0	0	0	7.33258	0	0	0	0	0	0	0	0
Elongator complex protein 6 (Angiotonin-transactivated protein 1) (Protein TMEM103)	ELP6	0	0	0	0	0	0	0	0	0	0	0	0	0	0	0	0	0	0	0	0	0	0	0	0	0	0	0	0	0	0	0	0	0	0	0	0	0	0	0	0	0	0	0	0	0	0	0	0
Phosphatidylinositol N-acetylglucosaminyltransferase subunit Q (N-acetylglucosamyl transferase component GPI1) (Phosphatidylinositol-glycan biosynthesis class Q protein) (PIG-Q)	PIGQ	0	0	0	0	0	0	0	0	0	0	0	0	0	0	0	0	0	0	0	0	0	0	0	0	0	0	0	0	0	0	0	0	0	0	0	0	0	0	0	0	0	0	0	0	0	0	0	0
Zinc finger and BTB domain-containing protein 16 (Promyelocytic leukemia zinc finger protein) (Zinc finger protein 145) (Zinc finger protein PLZF)	ZBTB16	0	0	0	0	0	0	0	0	0	0	7.2108	0	0	0	9.82883	0	7.7889	7.12715	0	0	7.1664	0	0	0	8.35884	0	0	0	8.73451	0	0	7.58269	7.69064	0	0	0	0	0	0	0	9.10602	0	7.85614	7.81567	7.73899	0	0	9.37317
Protein KRI1 homolog	KRI1	0	0	0	0	0	0	0	0	0	0	0	7.74643	0	0	0	0	0	0	0	0	0	0	0	0	0	0	0	0	0	0	0	0	0	0	0	8.43201	0	0	0	0	0	0	0	0	0	0	0	0
Dihydroorotate dehydrogenase (quinone), mitochondrial (DHOdehase) (EC 1.3.5.2) (Dihydroorotate oxidase)	DHODH	0	0	0	0	8.63841	0	0	9.39093	0	0	0	0	0	0	9.5583	0	0	0	0	0	0	0	8.04429	0	0	0	0	0	0	0	0	0	8.47438	8.3309	0	0	0	0	9.72753	7.35521	8.7294	0	8.99201	0	7.94355	8.92813	0	9.13676
Armadillo repeat-containing protein 6	ARMC6	10.0467	10.1421	0	0	0	0	0	10.0752	9.64985	0	8.92759	0	10.4064	0	10.1402	8.90544	8.9707	9.61849	0	0	0	0	0	0	0	0	8.96303	10.0042	9.81615	0	0	0	9.75645	9.19364	0	9.35767	0	8.49706	9.21923	6.5186	0	9.43446	10.2249	0	9.29111	9.33031	8.992	0
Intermembrane lipid transfer protein VPS13D (Vacuolar protein sorting-associated protein 13D)	VPS13D	0	0	0	0	0	0	0	0	0	0	0	0	0	0	0	0	0	0	0	0	0	0	0	0	0	0	0	0	0	0	0	0	7.88313	0	0	7.86183	0	0	0	0	0	0	7.92288	0	0	0	0	0
Cytochrome c oxidase subunit 5B, mitochondrial (Cytochrome c oxidase polypeptide Vb)	COX5B	12.7095	11.8664	7.12517	0	0	0	0	11.9652	11.8731	0	9.31382	0	11.0129	0	12.0293	11.5492	12.8941	12.864	0	8.88119	9.55006	0	0	0	0	0	9.62783	11.1705	10.5926	0	7.14091	0	9.41261	7.61786	8.8109	13.5131	0	0	0	7.52275	9.64702	0	10.2526	0	12.1821	13.6969	11.2237	10.1806
Plexin-A2 (Semaphorin receptor OCT)	PLXNA2	0	0	0	0	0	0	0	0	0	0	0	7.62122	10.673	0	0	0	8.07982	7.87087	0	0	6.65551	0	0	8.38026	8.83267	10.6098	8.61308	0	0	0	7.46732	7.70927	0	7.64168	0	0	0	8.58062	9.40607	7.31305	9.38041	0	0	0	8.33078	8.87721	0	0
Rho family-interacting cell polarization regulator 1	RIPOR1	0	0	0	0	0	0	0	0	0	0	0	7.26145	0	0	0	0	0	0	0	6.53322	0	8.51428	0	0	0	9.10684	0	0	0	8.04142	0	0	0	0	6.75029	0	8.6504	0	9.23804	0	8.91513	0	0	8.25999	0	0	0	8.32081
Myocardin-related transcription factor B (MRTF-B) (MKL/myocardin-like protein 2) (Megakaryoblastic leukemia 2)	MRTFB	9.47828	10.741	0	0	0	0	0	9.56502	8.94484	0	8.57365	0	0	0	9.77862	7.53013	9.62944	8.74541	0	0	7.19388	0	0	0	0	0	7.25473	10.7713	9.52515	0	0	0	10.2002	0	0	0	0	0	0	0	0	0	9.76707	0	9.55278	9.71713	8.25854	9.98483
Neutral amino acid transporter A (Alanine/serine/cysteine/threonine transporter 1) (ASCT-1) (Solute carrier family 1 member 4)	SLC1A4	0	0	9.32787	0	9.84456	10.8734	9.52826	0	0	8.80628	0	7.34995	0	0	0	0	0	0	9.42897	7.02974	0	7.919	8.05693	9.24915	9.96477	8.56645	0	10.4123	0	9.06528	9.19918	8.90478	0	10.0341	8.48704	0	0	10.1596	10.1194	9.29315	9.74799	8.36473	11.6624	9.22186	0	11.2172	0	10.2622
Huntingtin-interacting protein 1-related protein (HIP1-related protein) (Huntingtin-interacting protein 12) (HIP-12)	HIP1R	9.47468	0	0	0	0	0	0	0	10.1103	0	9.46018	0	0	0	10.894	10.0573	11.1375	9.41699	8.66044	0	0	0	8.84058	0	0	0	0	11.2585	8.95499	0	0	8.60393	9.20826	0	0	9.17639	10.1542	0	0	0	9.84336	0	9.04856	10.104	9.22454	8.76662	9.64896	9.57243
Protein-L-isoaspartate O-methyltransferase domain-containing protein 1	PCMTD1	0	0	0	0	0	0	0	0	0	0	0	0	0	7.90659	0	0	0	0	0	0	0	0	9.01862	0	0	0	0	0	0	8.97827	0	9.07508	0	0	0	0	0	0	0	0	10.1085	0	0	0	0	0	0	10.8674
Protein PRRC2A (HLA-B-associated transcript 2) (Large proline-rich protein BAT2) (Proline-rich and coiled-coil-containing protein 2A) (Protein G2)	PRRC2A	0	0	0	0	0	0	0	0	0	0	0	0	10.0668	8.11907	0	0	0	0	0	0	0	0	0	0	0	0	0	0	9.7654	0	7.88773	0	9.71227	0	0	0	0	9.06955	0	0	0	0	9.82491	0	8.61559	9.65599	0	10.6957
Leukocyte surface antigen CD47 (Antigenic surface determinant protein OA3) (Integrin-associated protein) (IAP) (Protein MER6) (CD antigen CD47)	CD47	0	10.1709	10.7849	11.9311	12.9902	13.5979	11.3535	8.94577	8.98792	10.9505	0	13.0729	10.0556	11.5971	8.54732	0	14.537	10.6119	10.8387	11.5565	12.4242	0	11.4201	10.7208	11.7953	11.9672	8.82353	11.003	9.26162	12.0641	11.7511	11.3197	0	0	12.3145	0	9.59341	12.7157	10.7355	12.8097	0	9.10013	9.30117	11.2588	10.6893	9.17207	0	0
Peroxisomal membrane protein PEX16 (Peroxin-16) (Peroxisomal biogenesis factor 16)	PEX16	0	10.307	0	0	0	0	0	0	0	0	0	0	0	8.10068	0	10.1836	9.64287	0	0	8.00488	0	0	0	0	10.3357	0	7.84946	0	8.92533	0	0	0	0	0	0	0	0	0	0	0	0	0	9.31589	0	9.17299	0	0	0
V-type proton ATPase subunit G 2 (V-ATPase subunit G 2) (V-ATPase 13 kDa subunit 2) (Vacuolar proton pump subunit G 2)	ATP6V1G2	0	8.35668	0	0	0	0	0	9.4654	8.86904	0	0	0	8.00201	0	9.15937	7.09244	12.5998	7.91911	0	0	7.15428	0	0	0	0	0	0	11.2044	7.48835	0	0	0	6.47495	0	0	8.366	0	0	0	0	0	0	0	0	7.45735	9.03799	7.98073	7.85672
Midasin (Dynein-related AAA-ATPase MDN1) (MIDAS-containing protein)	MDN1	0	0	0	0	0	0	0	0	0	0	0	0	0	0	0	0	0	0	0	0	0	0	0	0	0	0	0	0	0	0	0	0	0	0	0	0	8.06757	0	0	0	0	0	0	0	0	0	0	0
Coiled-coil domain-containing protein 43	CCDC43	0	9.93959	0	0	7.56629	0	0	0	0	8.51355	0	7.91088	9.41783	0	8.50495	0	9.05439	0	0	0	10.8052	8.0654	0	0	8.77044	7.2849	8.20535	0	0	0	0	0	0	0	0	8.91847	0	8.30841	7.80733	0	9.21579	0	0	0	8.34593	8.43397	0	10.1922
Phosphatidate phosphatase LPIN1 (EC 3.1.3.4) (Lipin-1)	LPIN1	0	9.56025	0	0	0	0	0	0	8.93425	0	0	0	9.52825	0	8.95611	0	0	0	0	0	0	0	0	0	0	0	0	0	0	0	0	8.26154	7.78765	7.79861	0	0	0	0	0	0	0	0	7.7488	9.82364	0	0	0	8.27608
COUP transcription factor 2 (COUP-TF2) (Apolipoprotein A-I regulatory protein 1) (ARP-1) (COUP transcription factor II) (COUP-TF II) (Nuclear receptor subfamily 2 group F member 2)	NR2F2	0	0	0	0	0	0	0	0	0	9.83851	9.17364	0	0	0	0	0	0	0	8.16053	0	9.42354	0	0	0	0	0	8.92992	0	0	0	0	0	8.91721	8.63622	0	0	9.64689	0	0	7.87602	0	0	0	0	0	0	8.8486	0
Armadillo repeat-containing protein 1	ARMC1	9.36767	11.5817	0	0	0	0	0	0	11.269	0	0	0	10.9442	0	11.1278	9.65047	9.76658	9.83642	6.41505	0	7.02692	0	0	7.06034	0	0	8.46862	0	0	0	6.22481	6.83343	9.65173	8.10726	0	8.73464	0	0	0	0	0	0	9.12276	0	10.7754	11.7267	9.12907	0
Alpha-ketoglutarate dehydrogenase component 4 (Alpha-ketoglutarate dehydrogenase subunit 4)	KGD4	9.54879	9.76697	0	0	0	0	0	9.09385	8.19253	0	8.10813	0	8.04878	0	9.49439	8.30866	0	8.96568	0	0	6.25618	0	0	0	0	0	0	9.86984	0	0	0	0	8.65949	0	0	8.49075	0	0	0	0	0	0	9.17761	0	9.30985	13.6097	7.34146	0
Bridge-like lipid transfer protein family member 3A (ICBP90-binding protein 1) (UHRF1-binding protein 1) (Ubiquitin-like containing PHD and RING finger domains 1-binding protein 1)	BLTP3A	0	0	0	0	0	0	0	10.6567	0	0	0	7.00519	8.98474	0	0	0	8.43207	8.75881	0	6.95068	7.33873	0	0	0	0	0	0	0	0	0	0	0	8.88678	0	6.9493	8.30368	0	0	0	7.83398	0	9.9161	8.68849	0	8.89255	0	0	0
Microtubule-associated protein tau (Neurofibrillary tangle protein) (Paired helical filament-tau) (PHF-tau)	MAPT	7.92897	0	0	7.89206	0	0	0	0	0	0	8.38348	0	0	7.35348	0	8.82987	13.6859	0	7.54213	0	0	7.78577	0	0	0	0	0	11.2882	0	0	0	0	8.73125	6.68517	0	0	0	0	8.73752	0	0	0	8.57781	0	0	0	0	0
Pre-mRNA-splicing factor 38A	PRPF38A	0	0	0	0	0	0	0	0	0	0	0	0	0	0	0	0	0	0	0	9.42677	11.0454	0	0	0	9.66433	9.70443	0	0	0	0	0	0	0	0	0	0	9.01494	0	0	0	9.8859	10.2525	0	0	0	10.301	0	0
Translation initiation factor IF-2, mitochondrial (IF-2(Mt)) (IF-2Mt) (IF2(mt))	MTIF2	0	0	0	0	8.08582	0	0	10.4137	0	8.36839	0	0	0	0	0	0	8.9162	0	0	0	0	0	0	0	0	8.20674	0	10.2308	0	0	0	0	0	0	0	0	7.3634	0	0	8.47644	0	9.62062	0	0	0	9.43696	0	8.87856
Amine oxidase [flavin-containing] B (EC 1.4.3.21) (EC 1.4.3.4) (Monoamine oxidase type B) (MAO-B)	MAOB	8.71045	9.06691	7.81989	8.41378	9.03291	8.11825	8.40216	8.80417	0	0	0	0	0	9.04064	0	9.29469	11.5254	0	8.9963	0	0	8.14872	10.4447	8.74172	0	8.57152	8.84372	11.9241	8.63772	8.58166	8.52992	9.11802	8.90608	9.76477	7.5962	8.67188	0	0	8.69702	7.98077	9.14515	8.82821	8.86303	8.51567	8.67363	0	8.00278	0
Tight junction protein ZO-1 (Tight junction protein 1) (Zona occludens protein 1) (Zonula occludens protein 1)	TJP1	11.9494	11.876	0	0	0	0	0	11.6104	10.1876	9.41476	11.7763	9.13787	9.91638	0	11.1727	10.2498	9.35456	0	6.76851	9.48226	0	8.56491	0	0	8.95273	0	0	10.4895	0	0	0	0	12.1619	0	0	10.1471	9.16314	0	10.0689	7.76852	0	8.58139	11.9935	0	10.9185	11.1564	9.85426	11.4237
SLAM family member 5 (Cell surface antigen MAX.3) (Hly9-beta) (Leukocyte differentiation antigen CD84) (Signaling lymphocytic activation molecule 5) (CD antigen CD84)	CD84	0	0	0	8.5822	10.969	0	9.04085	0	0	0	0	7.59905	0	10.6878	0	0	0	0	7.64936	0	0	8.46787	7.83371	8.80862	8.40729	0	9.81645	0	0	8.06897	0	8.18872	0	0	7.80741	0	0	9.16667	0	8.22221	8.79536	9.49742	8.86122	8.64093	0	0	0	11.3619
NAD(P)H dehydrogenase [quinone] 1 (EC 1.6.5.2) (Azoreductase) (DT-diaphorase) (DTD) (Menadione reductase) (NAD(P)H:quinone oxidoreductase 1) (Phylloquinone reductase) (Quinone reductase 1) (QR1)	NQO1	11.1356	0	8.57136	6.66634	6.95676	7.95665	7.00123	0	0	0	0	7.48228	10.6738	0	8.53294	12.1661	10.2402	9.80623	9.15178	6.56269	7.30972	6.4284	8.43784	7.83295	8.05325	8.96052	10.5676	10.6218	8.69318	5.57614	0	7.92626	10.0693	8.73056	7.44796	9.57536	0	8.77183	9.99897	7.6432	9.13986	0	10.3598	7.83069	0	9.81264	10.1683	9.87187
Phospholipid-transporting ATPase IF (EC 7.6.2.1) (ATPase IR) (ATPase class VI type 11B) (P4-ATPase flippase complex alpha subunit ATP11B)	ATP11B	0	0	0	0	0	0	0	0	0	0	0	0	0	8.03633	0	0	0	0	0	0	0	0	0	0	0	0	0	0	0	0	0	9.04244	0	0	0	0	7.71281	0	0	0	0	0	0	0	0	0	0	0
Protein AAR2 homolog (AAR2 splicing factor homolog)	AAR2	0	0	0	0	0	0	0	0	0	0	0	0	0	0	0	0	0	0	0	0	0	0	0	8.46452	0	0	0	0	0	0	0	0	0	0	0	0	0	0	0	0	0	0	0	0	0	0	0	0
COP9 signalosome complex subunit 7b (SGN7b) (Signalosome subunit 7b) (JAB1-containing signalosome subunit 7b)	COPS7B	0	6.95492	0	0	0	0	0	0	8.06801	0	0	0	0	9.69411	8.70939	0	0	6.59257	0	0	0	0	0	0	0	0	0	8.34313	0	0	0	0	0	0	7.72216	0	0	0	0	0	0	0	0	0	7.58461	0	7.43198	0
Branched-chain-amino-acid aminotransferase, cytosolic (BCAT(c)) (EC 2.6.1.42) (Protein ECA39)	BCAT1	0	0	0	8.83227	0	0	8.68092	0	0	0	0	6.74165	0	0	8.69782	0	8.5529	0	7.39104	0	0	8.75568	8.9848	8.73234	7.77045	10.0906	7.65878	0	0	7.11593	8.64496	0	0	9.30902	8.20418	0	8.87926	8.64668	8.69275	7.68826	7.90121	8.09302	0	8.30904	0	0	8.14569	8.04393
Tetraspanin-14 (Tspan-14) (DC-TM4F2) (Transmembrane 4 superfamily member 14)	TSPAN14	0	0	7.79037	0	9.95115	8.25259	0	0	0	0	0	0	0	0	0	0	0	0	9.39113	8.6069	0	0	0	0	9.06186	8.77507	0	0	0	8.82405	0	0	0	0	7.48888	0	10.2584	9.32672	0	9.66788	8.56045	9.906	0	0	8.87685	7.29288	7.99231	10.9798
NAD-dependent protein deacetylase sirtuin-2 (EC 2.3.1.286) (NAD-dependent protein defatty-acylase sirtuin-2) (EC 2.3.1.-) (Regulatory protein SIR2 homolog 2) (SIR2-like protein 2)	SIRT2	0	9.06705	0	0	0	0	0	10.3708	9.82399	0	0	0	0	0	0	0	11.6663	0	6.99178	0	0	0	0	0	0	0	0	11.0167	0	7.93617	0	7.89923	7.65193	8.424	0	0	0	0	9.43309	9.11731	9.12235	0	8.98605	0	0	8.53768	0	0
Hemicentin-1 (Fibulin-6) (FIBL-6)	HMCN1	0	9.92511	0	8.19383	0	0	8.4326	7.78501	8.72021	7.73549	0	0	8.8951	7.73605	0	7.59713	0	0	7.42262	0	6.65185	0	8.72136	9.95142	0	0	0	8.25588	0	7.24332	7.41508	8.42604	0	7.3612	0	0	8.52915	0	0	7.32571	0	8.19601	8.06844	5.57395	8.76889	8.47611	8.20475	8.77579
rRNA-processing protein UTP23 homolog	UTP23	0	0	0	0	0	0	0	0	0	7.93285	0	0	0	7.27094	0	0	0	0	0	0	10.4689	0	0	0	8.74421	0	0	0	0	0	0	0	0	0	0	8.34311	0	0	9.33843	0	9.32513	8.77633	7.80338	0	0	0	0	8.97565
Core-binding factor subunit beta (CBF-beta) (Polyomavirus enhancer-binding protein 2 beta subunit) (PEA2-beta) (PEBP2-beta) (SL3-3 enhancer factor 1 subunit beta) (SL3/AKV core-binding factor beta subunit)	CBFB	0	0	0	0	0	0	8.09232	9.60945	9.54203	0	0	0	9.4656	8.65539	9.98753	9.89112	0	9.21125	0	0	10.0781	0	0	8.21849	9.25652	8.56418	9.78502	9.38761	9.78924	0	8.20813	0	9.72308	0	0	0	0	0	9.13043	0	8.15719	8.87564	9.73132	0	8.61422	9.83853	9.35612	9.46199
RNA transcription, translation and transport factor protein (CLE7 homolog) (CLE) (hCLE)	RTRAF	6.71295	9.05645	0	0	7.03415	0	0	0	8.10804	7.2345	7.37203	0	8.24875	8.70219	8.25626	7.75377	8.33403	7.26165	0	0	0	0	0	0	0	6.8688	9.14303	8.65519	0	0	0	0	7.32997	6.66376	9.46694	6.81808	0	0	0	0	7.92855	0	0	0	7.83243	0	8.10567	7.96406
Pleckstrin homology domain-containing family A member 1 (PH domain-containing family A member 1) (Tandem PH domain-containing protein 1) (TAPP-1)	PLEKHA1	0	0	0	0	0	0	0	0	0	0	0	0	0	0	0	0	0	0	0	0	0	0	0	0	0	9.5106	0	0	0	0	0	0	0	0	0	0	0	0	0	0	0	0	0	0	0	0	0	0
Calcium-dependent secretion activator 1 (Calcium-dependent activator protein for secretion 1) (CAPS-1)	CADPS	0	0	0	6.85275	0	0	0	0	0	0	0	0	0	0	9.67576	7.55234	11.2678	0	0	0	0	7.54461	0	6.60124	0	0	0	9.0953	0	7.09203	0	0	0	0	0	0	0	0	8.00545	6.08746	0	0	0	0	0	0	0	0
Leucine-rich repeat-containing protein 1 (LANO adapter protein) (LAP and no PDZ protein)	LRRC1	0	0	0	0	0	0	0	0	0	0	0	0	0	0	0	0	0	0	0	0	0	0	0	0	0	0	0	0	0	0	8.00133	0	0	0	0	0	0	0	0	0	8.19543	0	0	8.50651	0	0	0	0
TBC1 domain family member 8 (AD 3) (Vascular Rab-GAP/TBC-containing protein)	TBC1D8	0	0	0	0	0	0	0	0	0	0	0	8.1705	0	0	0	0	0	7.98516	0	0	0	0	0	0	0	8.98235	0	0	8.16627	0	0	0	8.39309	0	8.02881	8.40542	8.53705	0	0	0	0	8.87405	8.32746	0	8.88689	0	8.83948	9.85422
DnaJ homolog subfamily C member 9 (HDJC9) (DnaJ protein SB73)	DNAJC9	0	0	0	0	8.8503	0	0	0	0	9.57738	0	8.29697	0	9.19196	0	0	0	8.97443	0	0	0	0	0	0	9.61567	9.41494	0	0	8.66247	0	0	8.89218	0	9.38262	0	0	0	0	9.81369	0	9.73373	8.9066	9.68585	9.3562	0	0	0	9.40487
RelA-associated inhibitor (Inhibitor of ASPP protein) (Protein iASPP) (NFkB-interacting protein 1) (PPP1R13B-like protein)	PPP1R13L	0	0	0	0	0	0	0	0	0	0	0	0	8.98885	7.35587	8.64713	0	0	0	0	7.34844	0	7.83991	0	6.89962	0	7.91828	0	0	0	0	8.51928	0	0	0	0	0	0	0	0	0	0	8.24852	0	0	0	0	0	0
Sorting nexin-29 (RUN domain-containing protein 2A)	SNX29	0	0	0	0	0	0	0	0	0	0	0	0	0	0	0	0	0	0	0	0	0	0	0	0	0	0	0	0	0	0	0	0	0	0	0	0	0	0	0	0	0	0	0	0	0	0	0	0
Probable ATP-dependent RNA helicase DDX41 (EC 3.6.4.13) (DEAD box protein 41) (DEAD box protein abstrakt homolog)	DDX41	0	0	7.23943	0	0	6.38966	0	0	0	9.41758	0	0	0	0	0	0	0	0	0	7.99901	7.60056	0	0	0	0	9.31976	0	0	0	7.41666	0	0	0	0	0	0	0	0	0	6.71626	0	0	0	0	0	0	8.95794	0
Transcription elongation factor A protein-like 4 (TCEA-like protein 4) (Transcription elongation factor S-II protein-like 4)	TCEAL4	0	9.03703	0	0	0	0	0	8.49896	8.53058	0	7.79751	0	8.26736	0	9.8981	6.88348	7.76269	7.3177	0	0	6.88735	0	0	0	0	0	8.30762	8.10941	8.28309	0	0	0	7.8507	0	0	7.60232	0	0	0	5.72514	0	0	7.47792	0	7.41165	9.41286	7.01023	8.98459
Cytochrome b-c1 complex subunit 9 (Complex III subunit 9) (Complex III subunit X) (Cytochrome c1 non-heme 7 kDa protein) (Ubiquinol-cytochrome c reductase complex 7.2 kDa protein)	UQCR10	0	0	0	8.74053	0	0	0	0	0	8.26226	0	0	0	0	0	0	8.73662	0	0	6.89549	10.6407	0	0	0	9.47099	9.01557	0	9.81857	0	0	0	0	0	10.5535	7.96798	9.22629	0	0	8.44774	0	9.8669	8.72981	7.61742	8.19094	8.90339	0	0	0
Fatty acid-binding protein, adipocyte (Adipocyte lipid-binding protein) (ALBP) (Adipocyte-type fatty acid-binding protein) (A-FABP) (AFABP) (Fatty acid-binding protein 4)	FABP4	0	0	10.0685	8.8546	9.91105	10.3162	11.3337	0	0	0	9.13656	0	9.51041	10.3082	9.76731	9.3308	0	8.10052	10.1489	0	7.72381	0	13.9145	10.8546	8.97302	7.70348	9.14692	0	10.0185	11.7132	10.2241	12.4008	0	9.76935	8.48218	0	8.89058	10.7298	0	8.90828	0	8.46748	9.44125	11.4686	10.5246	10.2161	10.5531	9.75957
Platelet factor 4 (PF-4) (C-X-C motif chemokine 4) (Iroplact) (Oncostatin-A) [Cleaved into: Platelet factor 4, short form (Endothelial cell growth inhibitor)]	PF4	8.21363	10.7802	10.5071	9.93755	11.7255	10.9007	7.10775	9.47741	0	7.93782	9.00051	8.12031	0	14.0405	9.38025	8.32178	10.8394	10.1178	10.8009	10.1544	6.78469	7.75456	9.62958	10.0338	0	7.14201	7.50261	9.14976	7.57569	8.01849	9.9591	10.4263	0	10.1166	0	7.74611	10.8867	0	0	0	8.29905	8.96074	8.42058	10.2483	8.92587	10.0325	8.00939	9.3614
COMM domain-containing protein 2	COMMD2	7.99513	9.18483	0	8.9976	0	0	0	9.13811	9.06971	0	8.48196	0	0	0	9.2937	7.96831	7.2582	7.8222	0	0	0	0	7.57969	0	11.1196	10.2369	0	8.95017	6.67844	0	8.71252	0	7.67743	8.84083	0	7.1075	0	0	9.35737	0	10.8165	10.2207	8.72726	10.4717	8.42707	7.32985	8.04988	9.65673
E3 ubiquitin-protein ligase TRIM33 (EC 2.3.2.27) (Ectodermin homolog) (RET-fused gene 7 protein) (Protein Rfg7) (RING-type E3 ubiquitin transferase TRIM33) (Transcription intermediary factor 1-gamma) (TIF1-gamma) (Tripartite motif-containing protein 33)	TRIM33	0	0	0	0	0	0	0	0	0	0	0	0	0	0	9.96776	0	0	0	0	0	0	0	0	0	0	0	0	0	0	0	0	0	0	0	0	0	0	0	0	8.01556	0	10.1273	0	0	7.78585	8.55289	0	0
Negative elongation factor E (NELF-E) (RNA-binding protein RD)	NELFE	0	0	0	0	8.04699	0	0	0	9.45682	0	0	0	9.03939	0	0	0	0	8.29611	0	0	10.4174	9.15065	0	0	9.22111	0	7.65383	8.79274	7.10703	0	0	0	0	0	0	8.03605	0	0	9.34862	8.24256	9.2548	9.36511	0	0	0	0	8.52192	8.92646
Glycine dehydrogenase (decarboxylating), mitochondrial (EC 1.4.4.2) (Glycine cleavage system P protein) (Glycine decarboxylase) (Glycine dehydrogenase (aminomethyl-transferring))	GLDC	8.36106	10.5874	0	0	0	0	0	10.8405	8.887	7.46634	8.45058	0	0	0	0	0	7.6388	8.26255	0	0	0	0	0	0	0	0	0	10.0455	8.41495	0	0	0	8.27083	6.62849	0	7.79418	0	0	0	7.38959	0	0	9.61325	0	7.76728	7.27832	8.72156	0
Serine protease HTRA1 (EC 3.4.21.-) (High-temperature requirement A serine peptidase 1) (L56) (Serine protease 11)	HTRA1	8.9343	0	11.9614	12.1064	10.0658	12.171	11.9739	0	0	11.4027	10.3594	0	8.14777	8.98958	10.2363	10.3459	10.3639	0	12.4973	8.41958	0	10.4746	11.1266	12.2965	10.4704	8.37538	9.54119	8.31825	9.22377	11.7033	12.911	9.98387	8.55456	9.2394	10.6116	8.77694	10.7633	9.10722	9.37372	9.92657	10.3069	11.626	8.58632	10.7152	0	8.58554	9.14435	9.57278
Carbamoyl-phosphate synthase [ammonia], mitochondrial (EC 6.3.4.16) (Carbamoyl-phosphate synthetase I) (CPSase I)	CPS1	0	0	0	0	9.85354	0	0	0	0	0	0	6.56219	0	0	0	0	0	0	0	0	0	0	0	0	0	0	0	0	0	0	7.48475	0	0	0	8.63141	7.24045	7.37289	0	0	0	0	8.96193	0	0	0	0	0	0
Ubiquitin-associated domain-containing protein 2 (UBA domain-containing protein 2) (Phosphoglycerate dehydrogenase-like protein 1)	UBAC2	0	0	0	0	0	0	0	0	10.2733	0	0	0	10.3177	0	0	0	0	0	0	0	8.57407	0	0	9.11476	0	0	8.72322	0	0	0	8.37554	0	0	0	0	8.87513	0	0	0	9.50453	0	0	0	0	0	0	9.8582	0
Solute carrier family 15 member 2 (Kidney H(+)/peptide cotransporter) (Oligopeptide transporter, kidney isoform) (Peptide transporter 2)	SLC15A2	0	10.6013	0	8.07634	0	0	0	0	0	0	0	8.13828	0	0	0	0	0	0	0	0	0	0	0	0	0	0	0	0	0	0	0	0	0	0	8.0977	0	0	0	0	0	0	0	0	0	0	7.57792	0	0
Ribosyldihydronicotinamide dehydrogenase [quinone] (EC 1.10.5.1) (NRH dehydrogenase [quinone] 2) (NRH:quinone oxidoreductase 2) (Quinone reductase 2) (QR2)	NQO2	11.1773	0	0	8.75315	0	0	0	0	0	0	0	8.60913	9.17606	0	0	0	10.9321	0	0	0	0	0	8.32129	8.393	0	9.8135	8.78995	0	8.7174	8.57984	9.55099	8.75897	11.275	0	0	10.261	9.14604	9.39857	0	0	9.28763	10.0657	11.9717	9.5422	9.88977	9.2642	9.4513	9.7576
Large ribosomal subunit protein mL65 (39S ribosomal protein S30, mitochondrial) (MRP-S30) (S30mt) (Large ribosomal subunit protein mS30) (Programmed cell death protein 9)	MRPS30	0	10.7033	0	0	0	0	0	0	11.065	0	0	0	0	0	10.8841	10.5243	0	9.25193	10.0765	0	0	0	0	0	0	0	0	9.90539	9.82597	0	0	0	0	0	0	10.2717	8.7246	0	0	7.58177	0	0	0	9.36355	10.0772	10.7868	9.87624	9.95798
Hexokinase-2 (EC 2.7.1.1) (Hexokinase type II) (HK II) (Hexokinase-B) (Muscle form hexokinase)	HK2	0	0	0	7.68398	0	0	0	0	9.84992	8.53086	9.14539	8.15059	0	0	0	0	0	0	0	6.81423	0	9.56798	0	0	0	0	0	0	0	0	0	0	0	7.84012	8.43439	8.05324	8.19541	0	0	7.07951	0	8.73386	8.80898	0	0	0	8.50865	0
BAG family molecular chaperone regulator 3 (BAG-3) (Bcl-2-associated athanogene 3) (Bcl-2-binding protein Bis) (Docking protein CAIR-1)	BAG3	0	8.73122	0	0	0	0	0	8.4605	8.84363	0	0	0	9.8966	0	9.09036	7.33332	9.51834	8.26386	0	0	6.29818	6.52035	0	0	0	0	0	8.97552	0	0	0	0	0	8.05889	0	0	0	0	0	0	0	0	0	0	8.75694	9.74696	6.7958	0
DEP domain-containing mTOR-interacting protein (hDEPTOR) (DEP domain-containing protein 6)	DEPTOR	0	0	0	0	9.11546	0	0	0	0	0	0	0	0	0	0	0	0	0	0	0	0	0	0	7.9991	0	0	0	0	0	0	0	7.96138	0	8.45745	0	0	8.0552	10.3751	0	0	0	0	0	0	0	0	8.56126	0
MICOS complex subunit MIC13 (Protein P117)	MICOS13	6.87453	10.0592	0	0	0	0	0	0	9.48711	0	0	0	9.97256	0	0	7.56109	0	0	5.27282	0	0	0	0	0	0	0	0	6.85997	0	0	0	0	0	7.08225	0	0	0	0	0	7.01263	0	6.8598	0	6.55169	0	0	0	7.81089
N6-adenosine-methyltransferase catalytic subunit (EC 2.1.1.348) (Methyltransferase-like protein 3) (hMETTL3) (N6-adenosine-methyltransferase 70 kDa subunit) (MT-A70)	METTL3	0	0	0	0	0	0	0	0	0	0	9.80165	0	0	0	0	0	0	9.35965	0	0	0	0	0	0	0	8.6589	0	0	9.79975	0	0	0	0	0	0	9.8516	0	0	0	0	7.96279	8.25766	9.66582	8.63015	0	9.86307	0	9.3713
Ras-related protein Rab-6B (EC 3.6.5.2)	RAB6B	11.487	0	8.57357	0	10.9274	10.3996	8.49591	0	9.11505	0	10.1849	8.55689	0	11.8343	0	0	11.8111	0	0	8.87116	0	9.71121	8.58934	9.76845	9.70251	0	0	9.96102	8.64197	8.0294	8.13126	9.55111	8.64691	9.59929	0	7.90979	9.21444	9.64104	0	10.4242	9.71422	0	9.21556	10.0522	7.9921	7.48313	0	0
TELO2-interacting protein 2	TTI2	0	0	0	0	0	0	0	11.0358	0	0	8.6653	0	0	0	12.0435	0	7.04641	0	6.88214	0	0	0	0	0	0	0	0	0	0	0	0	0	8.89125	0	0	0	0	0	0	0	0	0	8.24077	0	7.91129	0	7.99066	0
Immunoglobulin lambda variable 6-57 (Ig lambda chain V-VI region AR) (Ig lambda chain V-VI region EB4) (Ig lambda chain V-VI region NIG-48) (Ig lambda chain V-VI region SUT) (Ig lambda chain V-VI region WLT)	IGLV6-57	0	0	0	9.89598	0	9.65594	11.699	0	0	0	0	10.465	0	9.59613	0	0	0	0	10.7784	0	0	8.80116	9.48088	8.68809	0	0	0	0	0	0	9.19604	9.44671	0	8.59704	0	0	0	7.77156	7.19483	0	0	10.4896	0	0	0	0	0	0
TELO2-interacting protein 1 homolog (Protein SMG10)	TTI1	0	0	0	0	0	0	0	0	12.9075	0	0	0	0	0	0	0	0	0	0	0	0	9.4657	0	0	0	8.2596	0	0	0	8.63472	0	0	0	0	0	11.5242	0	10.5636	0	8.19708	0	0	0	0	0	0	9.55498	10.4042
PDZ and LIM domain protein 4 (LIM protein RIL) (Reversion-induced LIM protein)	PDLIM4	8.60109	9.21605	0	0	0	0	0	9.1239	8.87928	0	8.1935	0	8.752	0	9.77024	8.64175	0	7.76302	0	0	7.00696	8.50493	0	0	7.99905	0	9.71016	9.39294	8.4539	0	7.12525	0	8.20198	0	0	8.7313	0	0	0	6.89999	8.50042	0	7.97182	0	8.84132	9.1053	8.21952	7.74848
Bifunctional arginine demethylase and lysyl-hydroxylase JMJD6 (EC 1.14.11.-) (Histone arginine demethylase JMJD6) (JmjC domain-containing protein 6) (Jumonji domain-containing protein 6) (Lysyl-hydroxylase JMJD6) (Peptide-lysine 5-dioxygenase JMJD6) (Phosphatidylserine receptor) (Protein PTDSR)	JMJD6	0	0	0	0	0	8.6311	0	0	0	0	0	0	0	8.16097	0	0	0	0	0	0	7.90892	8.37553	0	0	0	9.48298	0	0	0	0	0	8.47405	0	8.45068	0	0	8.16441	0	0	0	8.5281	8.54312	0	8.63055	0	0	0	9.42235
Glucocorticoid receptor (GR) (Nuclear receptor subfamily 3 group C member 1)	NR3C1	0	0	0	0	0	0	0	0	6.69649	0	0	0	0	0	10.7045	0	0	7.34079	0	0	0	0	0	0	0	0	0	0	7.10446	0	0	0	7.60333	5.98159	0	0	0	0	0	7.26799	0	0	8.19172	0	8.52289	8.49436	7.18193	8.86045
Segment polarity protein dishevelled homolog DVL-3 (Dishevelled-3) (DSH homolog 3)	DVL3	0	0	0	0	0	0	0	0	0	0	0	8.54998	0	0	0	0	0	0	0	0	9.25451	0	0	0	9.05039	8.52243	0	0	0	0	0	0	0	0	0	0	7.89345	8.92306	9.48802	8.37786	8.732	0	0	9.06222	0	0	9.34078	0
Kinesin-like protein KIF3A (Microtubule plus end-directed kinesin motor 3A)	KIF3A	6.93306	0	0	0	0	0	0	0	0	0	7.85403	0	0	0	0	0	9.49161	0	0	0	0	0	0	0	0	0	8.3677	9.67482	9.15249	0	0	0	9.14833	0	0	8.06032	0	9.04084	0	0	0	0	8.77721	0	0	0	0	10.8015
Putative RNA-binding protein Luc7-like 2	LUC7L2	0	0	0	0	0	0	0	0	0	0	0	0	0	7.80259	0	0	0	0	0	7.62491	8.93209	0	0	7.9766	8.48068	0	0	0	0	0	7.873	0	0	0	0	7.86237	0	0	8.25228	0	8.47253	0	0	0	0	0	8.25065	0
Sideroflexin-5	SFXN5	8.86852	0	0	0	0	0	0	0	0	0	6.85957	0	0	0	0	8.5597	10.6654	0	0	0	0	0	0	0	0	0	0	11.5207	0	0	0	0	9.20179	6.00407	0	0	0	0	0	0	0	0	8.39626	0	0	8.15626	7.13398	10.2063
Wings apart-like protein homolog (Friend of EBNA2 protein) (WAPL cohesin release factor)	WAPL	0	0	0	0	0	0	0	0	0	0	0	0	0	0	0	0	0	0	0	0	0	0	0	0	0	0	0	0	0	0	0	0	0	0	0	0	6.71026	7.73316	0	0	0	0	0	7.56366	0	0	0	0
RNA-binding protein 34 (RNA-binding motif protein 34)	RBM34	0	0	0	0	0	0	0	0	0	0	0	0	8.32127	7.37956	8.51693	0	0	0	0	0	10.2348	0	0	0	0	0	6.78953	0	0	0	0	0	0	0	7.08511	8.1192	0	0	9.302	0	0	0	0	0	0	0	0	0
HIG1 domain family member 1A, mitochondrial (Hypoxia-inducible gene 1 protein) (RCF1 homolog A) (RCF1a)	HIGD1A	0	0	0	5.59512	0	0	8.40088	10.7433	7.79468	9.11312	0	8.42751	8.34476	0	10.6165	0	10.519	10.0706	9.00169	7.20579	11.3683	9.8887	0	0	10.2409	9.44338	9.40156	11.0271	9.31919	0	0	0	0	0	6.2452	8.97261	0	8.8698	10.2747	11.5323	0	0	8.22719	8.51764	10.4146	0	0	0
Large neutral amino acids transporter small subunit 1 (4F2 light chain) (4F2 LC) (4F2LC) (CD98 light chain) (Integral membrane protein E16) (E16) (L-type amino acid transporter 1) (hLAT1) (Solute carrier family 7 member 5) (y+ system cationic amino acid transporter)	SLC7A5	0	0	0	0	0	0	0	0	0	8.55905	0	0	0	0	0	7.94809	10.3754	0	0	0	0	0	0	0	0	0	0	9.91265	0	0	0	0	0	0	7.31551	0	0	0	10.2739	0	0	9.37999	0	0	0	0	7.77314	0
Protein sidekick-2	SDK2	0	0	0	0	0	0	0	0	7.54375	0	0	0	0	0	9.06719	9.7333	0	0	0	0	0	0	0	0	0	0	0	7.76175	9.33047	0	0	0	8.70127	0	0	0	0	0	0	0	0	8.21777	8.93058	0	0	0	7.71555	8.77844
Elongation factor 1-delta (EF-1-delta) (Antigen NY-CO-4)	EEF1D	8.90829	0	9.64513	9.85421	0	8.41683	0	11.756	12.8865	0	0	0	12.5511	0	12.8023	10.1981	10.6702	12.3781	8.50748	10.2962	8.89196	0	0	9.7864	11.5064	10.4387	12.6913	0	0	10.5286	0	10.0806	12.0333	11.2324	9.90399	12.6213	0	10.2089	11.43	0	11.7088	10.4221	12.1487	10.6154	12.3962	12.0129	11.9168	12.8856
E3 ubiquitin ligase RNF121 (EC 2.3.2.27) (RING finger protein 121)	RNF121	0	0	0	0	0	0	0	0	0	0	0	0	0	0	0	0	0	0	0	0	0	9.11127	0	0	10.2869	9.25907	0	0	0	0	0	0	0	0	0	0	0	0	9.65089	8.49575	9.98819	9.70955	0	0	0	8.18883	0	0
Dol-P-Man:Man(7)GlcNAc(2)-PP-Dol alpha-1,6-mannosyltransferase (EC 2.4.1.260) (Asparagine-linked glycosylation protein 12 homolog) (hALG12) (Dolichyl-P-Man:Man(7)GlcNAc(2)-PP-dolichyl-alpha-1,6-mannosyltransferase) (Mannosyltransferase ALG12 homolog) (Membrane protein SB87)	ALG12	0	9.49065	0	0	0	0	0	0	0	0	6.70685	0	0	0	10.9076	0	0	9.14889	0	0	5.5578	0	0	0	0	0	8.41272	0	8.61424	0	0	0	0	6.15083	0	0	0	0	0	0	0	0	0	0	8.87582	0	7.30842	9.29449
Protein-lysine 6-oxidase (EC 1.4.3.13) (Lysyl oxidase) [Cleaved into: Protein-lysine 6-oxidase, long form; Protein-lysine 6-oxidase, short form]	LOX	0	0	6.83943	8.75802	0	7.30203	9.3276	0	0	0	0	0	0	7.54065	9.97387	0	0	0	7.74202	0	0	0	8.33728	8.95323	0	0	0	0	0	7.72677	8.39541	7.85691	0	7.34298	6.89671	7.30149	0	0	0	0	0	0	0	8.76354	0	0	0	0
Lipid droplet-associated hydrolase (EC 3.1.1.-) (Lipid droplet-associated serine hydrolase) (hLDAH)	LDAH	0	0	0	0	0	0	0	0	10.0198	0	0	0	0	0	0	8.84119	0	0	0	0	0	0	0	0	0	8.25001	0	8.32671	0	7.73605	0	0	0	0	8.52565	0	0	0	0	0	0	0	8.71566	0	0	0	9.9002	0
Serine/threonine-protein kinase 11-interacting protein (LKB1-interacting protein 1)	STK11IP	0	0	0	0	0	0	0	0	0	0	0	0	0	0	0	0	0	0	7.87472	0	0	0	0	8.94958	0	0	0	0	0	0	0	9.03594	0	7.79361	8.22877	0	8.37282	10.0857	0	0	0	0	0	0	0	0	0	0
Methylmalonic aciduria type A protein, mitochondrial (EC 3.6.-.-)	MMAA	0	0	0	0	0	6.42271	0	0	0	0	7.7188	0	0	0	8.79211	7.92848	8.87599	0	0	0	0	0	8.41696	0	0	0	0	9.08337	0	0	0	9.22082	8.54686	8.68418	0	0	0	0	0	0	0	0	7.66384	0	7.61005	6.91968	8.18389	10.8621
Nuclear receptor corepressor 1 (N-CoR) (N-CoR1)	NCOR1	0	0	0	0	0	0	9.38973	0	0	10.0105	0	8.63344	0	0	9.50246	0	0	8.06798	0	0	0	0	0	0	0	0	0	0	0	0	0	0	0	8.2768	0	9.81019	0	0	0	0	0	10.1582	0	0	8.47248	0	0	0
Melanotransferrin (Melanoma-associated antigen p97) (CD antigen CD228)	MELTF	0	0	7.58294	0	0	8.85764	9.66999	0	0	0	0	0	0	0	11.7359	10.1816	0	8.36158	7.94235	0	0	0	7.34778	8.12219	0	7.9481	0	0	0	0	8.64726	7.7279	0	0	0	8.26918	0	0	0	0	0	0	0	8.69573	0	0	9.12049	0
Ceroid-lipofuscinosis neuronal protein 6 (Protein CLN6)	CLN6	0	0	0	0	0	0	0	0	0	0	0	0	0	7.57123	9.5219	0	0	0	0	0	0	0	0	0	0	0	0	0	0	0	0	0	0	0	0	0	0	0	0	0	0	0	0	0	0	0	0	9.45288
Tumor necrosis factor receptor superfamily member 5 (B-cell surface antigen CD40) (Bp50) (CD40L receptor) (CDw40) (CD antigen CD40)	CD40	0	0	7.6751	7.06067	9.57678	9.18164	8.97402	0	0	0	0	0	0	8.98367	11.3526	0	0	0	8.40896	6.89374	0	8.15561	9.01309	7.81116	0	0	9.11271	0	8.89214	8.34534	0	8.46612	0	0	7.62807	9.4015	9.03446	9.06001	0	9.03373	9.30796	0	9.31787	8.31554	0	9.24846	8.77672	10.1644
CMP-sialic acid transporter (CMP-SA-Tr) (CMP-Sia-Tr) (CST) (Solute carrier family 35 member A1)	SLC35A1	0	8.84174	0	0	0	0	0	0	7.1466	7.43616	0	7.56094	6.66635	0	0	7.67851	0	0	0	6.43675	0	7.38369	0	0	7.69125	0	8.29451	6.90878	0	7.13052	0	0	0	0	0	0	0	7.03915	0	7.13581	7.90473	0	0	0	0	6.71091	8.13907	7.98718
Dynein axonemal assembly factor 5 (HEAT repeat-containing protein 2)	DNAAF5	0	0	0	6.78044	0	7.48371	0	0	0	0	0	0	0	0	0	0	0	0	7.08758	0	0	0	8.09824	0	0	0	0	0	0	7.23327	7.60696	8.08653	0	9.11162	0	0	8.68934	0	0	0	0	0	0	0	0	0	7.91395	0
Queuine tRNA-ribosyltransferase accessory subunit 2 (Queuine tRNA-ribosyltransferase domain-containing protein 1)	QTRT2	0	0	0	0	0	0	0	0	0	0	8.26499	0	8.82054	0	0	0	0	0	0	0	0	0	0	0	0	0	0	0	0	0	0	0	8.36279	0	0	8.21339	0	0	0	0	0	0	8.75328	0	0	0	0	0
Protein jagged-1 (Jagged1) (hJ1) (CD antigen CD339)	JAG1	0	10.4168	0	0	0	0	0	10.536	0	0	8.77693	0	0	0	9.38404	9.89327	0	10.0043	7.60063	0	0	0	6.84031	0	0	9.32448	9.07965	0	9.70272	0	0	0	10.2806	6.92244	0	9.67947	0	9.08913	9.93834	6.87712	0	0	10.0065	0	9.58212	9.66468	8.06856	10.3429
Cytochrome b-c1 complex subunit 6, mitochondrial (Complex III subunit 6) (Complex III subunit VIII) (Cytochrome c1 non-heme 11 kDa protein) (Mitochondrial hinge protein) (Ubiquinol-cytochrome c reductase complex 11 kDa protein)	UQCRH	9.91416	10.4526	0	0	0	0	0	9.3751	10.0763	0	8.2429	8.6208	9.85129	0	11.1291	9.76091	10.705	10.4384	0	0	7.37845	0	8.12426	0	0	0	0	10.54	10.8229	8.72579	7.41629	0	8.58757	7.64431	0	10.9087	8.00775	9.5416	0	0	0	8.99449	8.32445	9.58945	10.5564	10.6649	8.69471	10.3112
Adenylyl cyclase-associated protein 1 (CAP 1)	CAP1	7.54315	11.2737	0	0	9.76214	5.59567	8.93641	10.0386	12.7842	0	9.02721	9.05193	13.8683	11.0195	9.99372	0	0	8.78741	10.6373	0	9.41145	0	9.83724	0	9.56714	0	0	11.8875	0	0	0	10.6371	10.1757	11.1087	0	0	0	0	8.54581	9.11829	12.1308	8.11662	11.0076	10.8825	8.71773	0	10.451	10.7864
Protein phosphatase 1 regulatory subunit 3D (Protein phosphatase 1 regulatory subunit 6) (PP1 subunit R6) (Protein phosphatase 1-binding subunit R6)	PPP1R3D	0	0	0	0	0	0	0	0	0	0	0	0	0	0	0	0	0	7.87693	8.66303	0	0	0	0	8.11303	0	0	0	0	0	0	0	8.35019	0	0	0	0	0	0	0	9.30135	0	0	0	9.80079	0	0	0	0
Origin recognition complex subunit 5	ORC5	0	0	0	0	0	0	0	0	0	0	0	0	0	0	0	0	0	0	0	0	0	0	0	0	0	0	0	0	0	0	0	0	0	0	0	0	0	0	0	0	0	0	0	0	0	0	0	0
Histone-lysine N-methyltransferase SETD1A (EC 2.1.1.364) (Lysine N-methyltransferase 2F) (SET domain-containing protein 1A) (hSET1A) (Set1/Ash2 histone methyltransferase complex subunit SET1)	SETD1A	0	0	0	0	0	0	0	0	0	0	0	0	0	0	0	0	0	0	0	0	8.46063	7.97905	0	0	7.7615	0	0	0	0	0	0	0	0	0	0	0	6.85422	0	0	8.1216	0	0	0	0	0	0	0	0
Ribokinase (RK) (EC 2.7.1.15)	RBKS	0	0	0	0	9.39504	0	0	0	0	8.37373	9.7557	9.07015	0	0	8.4	11.8016	8.09248	0	0	0	0	9.12385	0	8.59847	8.78412	9.40725	0	0	8.406	9.55273	8.6992	0	0	0	9.19613	8.94975	0	10.2669	9.62553	9.28787	0	8.35234	0	8.54079	8.65725	8.13944	0	0
Tumor susceptibility gene 101 protein (ESCRT-I complex subunit TSG101)	TSG101	9.9159	9.79603	0	0	0	0	0	10.0803	9.86205	0	9.72577	0	9.94528	0	10.4778	9.31682	10.1082	10.6381	0	0	0	8.66048	0	0	8.51509	8.23688	10.3747	10.4373	0	0	0	0	9.57021	8.79935	0	10.5382	0	0	8.60503	7.46893	9.24347	0	9.41037	0	10.1004	10.6299	10.1486	8.57482
CapZ-interacting protein (Protein kinase substrate CapZIP) (RCSD domain-containing protein 1)	RCSD1	7.59744	8.12739	0	0	0	0	7.67429	8.44083	9.40493	0	8.53806	8.4381	8.70372	0	0	0	8.31252	8.30724	0	0	7.46586	0	6.13225	0	8.48918	9.00918	10.394	8.25826	9.88133	8.55443	6.15642	0	8.82131	0	0	8.17241	0	8.73968	9.64696	7.06373	8.45507	8.67071	7.67207	8.10805	7.35619	8.27116	0	8.91602
Actin remodeling regulator NHS (Congenital cataracts and dental anomalies protein) (Nance-Horan syndrome protein)	NHS	0	0	0	0	0	0	0	0	0	0	0	0	0	0	0	7.55366	0	0	0	0	0	0	0	0	0	0	0	0	9.02932	0	0	0	8.76926	0	0	0	0	0	0	0	0	8.87004	8.57213	0	0	0	0	0
Solute carrier family 22 member 18 (Beckwith-Wiedemann syndrome chromosomal region 1 candidate gene A protein) (Efflux transporter-like protein) (Imprinted multi-membrane-spanning polyspecific transporter-related protein 1) (Organic cation transporter-like protein 2) (ORCTL-2) (Solute carrier family 22 member 1-like) (Tumor-suppressing STF cDNA 5 protein) (Tumor-suppressing subchromosomal transfe…	SLC22A18	0	0	0	0	10.4122	10.8469	10.3084	0	11.1538	11.8796	0	7.70137	0	0	0	0	0	0	0	0	0	0	9.07519	9.80362	10.6727	11.632	9.35112	11.4141	10.9572	9.85271	0	9.85208	11.8701	10.5329	10.1132	0	10.1746	10.9922	11.038	12.4818	0	10.6925	0	10.055	11.6158	11.0786	0	0
F-box only protein 2	FBXO2	9.63348	0	9.41143	8.49989	9.07043	9.67439	10.8766	8.95032	0	8.04094	0	0	0	7.32287	10.1598	9.92575	10.9493	0	9.83159	0	0	10.0762	6.23975	10.5744	0	0	0	10.5079	8.7246	9.04694	9.46692	9.00445	9.04352	0	0	0	0	0	9.72808	0	0	7.2942	9.79833	10.7789	0	0	0	0
Pre-mRNA-splicing regulator WTAP (Female-lethal(2)D homolog) (hFL(2)D) (WT1-associated protein) (Wilms tumor 1-associating protein)	WTAP	8.32042	0	0	0	0	0	0	0	0	0	0	0	8.71409	0	0	0	0	0	0	0	0	8.75044	0	0	0	0	0	0	0	0	0	0	0	0	0	0	6.08471	0	9.18884	7.62796	0	0	0	0	8.12872	7.2429	0	0
Fibroblast growth factor receptor-like 1 (FGF receptor-like protein 1) (FGF homologous factor receptor) (FGFR-like protein) (Fibroblast growth factor receptor 5) (FGFR-5)	FGFRL1	0	0	0	0	0	0	0	0	0	8.87483	0	0	0	0	0	0	0	6.49011	0	0	0	9.76355	0	0	0	0	0	0	0	0	0	0	0	0	0	0	0	8.95628	8.54027	0	10.5591	7.87325	6.12634	0	6.39833	6.74698	0	10.2677
cAMP-dependent protein kinase type I-beta regulatory subunit	PRKAR1B	9.09311	0	0	0	0	0	0	11.6986	10.1383	0	7.82915	0	10.8438	7.96008	11.6438	8.9041	11.0228	0	7.5361	0	7.94625	0	0	0	9.54046	0	0	10.2183	8.79455	0	0	8.46653	0	8.14593	0	8.58757	0	0	0	0	9.54242	0	8.55585	0	0	0	9.24859	9.84607
Phosphofurin acidic cluster sorting protein 2 (PACS-2) (PACS1-like protein)	PACS2	0	0	0	0	0	0	0	9.76757	9.78069	0	0	8.32806	0	0	0	0	0	8.03901	8.3643	0	0	0	7.91488	0	0	0	0	10.8455	0	0	8.534	0	8.28415	8.63364	0	0	0	0	0	0	0	0	8.331	0	0	0	9.4275	0
Acyl-protein thioesterase 2 (APT-2) (EC 3.1.2.-) (Lysophospholipase II) (LPL-II) (LysoPLA II) (Palmitoyl-protein hydrolase) (EC 3.1.2.22)	LYPLA2	0	0	6.54888	0	0	0	0	0	0	0	0	0	0	0	0	0	8.06524	0	0	0	0	0	0	0	0	0	0	0	6.8353	0	0	0	7.48072	0	0	7.56092	0	0	0	0	0	0	0	0	8.37342	10.5016	7.69668	0
Heat shock factor protein 1 (HSF 1) (Heat shock transcription factor 1) (HSTF 1)	HSF1	0	0	0	0	0	0	0	8.8119	0	0	0	0	0	0	8.88114	0	0	0	0	0	0	0	0	0	0	0	0	0	0	0	0	0	0	0	0	0	0	0	0	0	0	0	0	0	0	0	8.32001	0
Anterior gradient protein 2 homolog (AG-2) (hAG-2) (HPC8) (Secreted cement gland protein XAG-2 homolog)	AGR2	0	0	0	7.01956	0	0	0	0	8.68565	0	0	0	8.21928	0	0	0	0	10.0149	0	0	9.05906	0	0	0	0	6.26786	0	9.52423	0	0	0	0	0	0	0	11.8123	0	0	0	0	0	0	0	0	7.37535	10.2521	7.81889	0
Scavenger receptor class F member 2 (SRECRP-1) (Scavenger receptor expressed by endothelial cells 2 protein) (SREC-II)	SCARF2	6.13878	0	0	0	0	6.57036	0	0	8.43561	0	6.96399	0	0	0	9.54523	7.33365	0	7.99917	7.97415	0	0	0	7.9213	8.12216	0	8.70765	8.51065	0	8.73338	0	7.18534	0	7.03251	0	0	8.00742	0	0	0	0	0	0	7.93064	6.95678	8.11548	8.60324	5.60938	9.05248
AN1-type zinc finger protein 1 (Zinc finger AN1-type-containing protein 1)	ZFAND1	8.5283	9.99629	0	0	0	0	0	8.84086	0	0	7.29708	0	0	0	9.27782	0	8.47278	8.06188	0	0	0	0	0	0	0	0	8.27923	9.21658	8.06774	0	0	0	8.03843	0	0	9.34104	0	0	9.01996	0	8.2538	0	7.69025	0	9.40978	9.53288	7.84544	0
Immunoglobulin lambda-like polypeptide 5 (G lambda-1) (Germline immunoglobulin lambda 1)	IGLL5	0	11.0527	12.7185	0	13.2284	15.6005	0	12.6885	12.2498	10.9798	9.53646	15.4284	12.7199	13.7141	12.8417	9.09381	11.5958	11.9021	14.1532	13.8326	12.1645	12.4252	13.9116	14.9945	13.465	0	12.639	13.3323	13.0405	13.588	13.8714	14.6298	9.2845	0	13.5812	0	10.7486	12.6743	11.0769	12.5145	12.8713	13.7259	11.9845	13.9445	12.2597	11.9286	0	0
Protein FAM162A (E2-induced gene 5 protein) (Growth and transformation-dependent protein) (HGTD-P)	FAM162A	10.4784	11.2518	0	0	9.01507	0	0	11.5727	10.8426	7.89213	11.8739	0	9.89291	8.16254	10.1255	10.5987	12.2175	10.0477	0	0	8.38231	0	0	0	9.04569	8.40648	10.1527	10.8075	10.0071	0	0	0	11.5494	0	0	10.9308	0	0	8.41309	0	9.35474	0	9.15971	0	10.1289	11.3042	9.21552	9.06606
Calcium-dependent secretion activator 2 (Calcium-dependent activator protein for secretion 2) (CAPS-2)	CADPS2	0	0	0	0	0	0	0	0	0	0	0	0	0	0	0	0	8.69665	0	0	0	0	0	0	0	0	0	0	0	0	0	0	0	0	0	0	0	0	0	0	0	0	0	0	0	0	0	0	0
ATP synthase subunit e, mitochondrial (ATPase subunit e) (ATP synthase membrane subunit e) [Cleaved into: ATP synthase subunit e, mitochondrial, N-terminally processed]	ATP5ME	8.7509	10.7041	9.72929	0	0	0	0	10.9514	9.87853	10.6386	0	0	10.2751	10.257	10.1126	0	10.924	9.13352	9.67856	0	12.7829	0	7.85379	0	9.9378	8.84603	0	10.5746	9.3199	0	9.39416	0	0	0	11.1155	10.4857	0	0	0	10.7624	9.95495	0	0	0	9.66507	10.617	8.59892	0
Matrilin-2	MATN2	0	0	0	9.4288	0	9.29634	9.20879	0	0	10.6283	0	0	0	0	0	0	0	0	8.47675	0	0	0	8.94354	8.34824	0	0	0	0	0	0	9.07703	8.53179	0	7.01222	0	0	0	0	0	7.99786	9.59506	0	0	9.47419	0	0	0	0
NADH dehydrogenase [ubiquinone] 1 alpha subcomplex assembly factor 4 (Hormone-regulated proliferation-associated protein of 20 kDa)	NDUFAF4	7.97404	0	0	0	0	0	0	10.5266	0	0	7.96924	0	9.11172	0	9.15696	0	9.18667	7.00164	0	0	6.60693	0	0	0	0	0	8.36674	8.88102	7.66601	0	0	0	8.65044	8.20502	0	8.63156	0	0	0	0	0	0	7.33531	0	7.69299	8.98887	0	9.76027
Signal peptide, CUB and EGF-like domain-containing protein 1	SCUBE1	0	0	9.10496	8.51368	0	9.28658	9.66676	8.30814	9.47395	7.88134	0	0	0	7.96994	0	0	0	0	8.91451	0	0	0	0	10.1186	0	0	0	0	9.19008	6.86222	9.84126	0	8.30732	7.1843	0	0	7.80841	6.18316	7.9027	0	0	6.75048	7.90507	8.56003	0	0	7.87411	0
Non-histone chromosomal protein HMG-17 (High mobility group nucleosome-binding domain-containing protein 2)	HMGN2	10.3254	10.411	8.11923	0	7.25927	0	5.73512	10.6115	12.3067	8.77432	9.1755	0	9.88646	5.84523	10.6104	9.0154	7.80877	10.5981	4.05242	0	9.65252	8.4308	0	8.39575	12.3281	0	10.334	10.1604	9.08357	0	8.33261	8.41773	9.57896	5.9839	0	0	6.03216	10.6018	9.05502	9.8569	0	8.10845	9.88854	8.53608	0	10.4793	9.58369	12.0523
Creatine kinase U-type, mitochondrial (EC 2.7.3.2) (Acidic-type mitochondrial creatine kinase) (Mia-CK) (Ubiquitous mitochondrial creatine kinase) (U-MtCK)	CKMT1A	9.34258	0	0	9.26661	0	9.34852	0	0	9.03207	0	9.03776	8.22045	0	7.22003	10.2771	8.97502	14.15	9.45627	9.14831	0	0	8.49216	9.18236	8.73055	9.19329	9.18773	0	11.4429	8.23314	0	10.8433	8.02412	8.82091	13.1598	6.9254	9.84043	8.86137	8.40963	9.55234	0	10.2176	0	8.24847	8.5364	8.9723	9.20644	8.01532	0
Nuclear inhibitor of protein phosphatase 1 (NIPP-1) (Protein phosphatase 1 regulatory inhibitor subunit 8) [Includes: Activator of RNA decay (EC 3.1.4.-) (ARD-1)]	PPP1R8	0	10.1405	0	0	0	0	7.73159	0	9.52811	0	10.1753	0	0	0	10.4038	9.43619	7.81228	10.237	0	0	9.37325	7.16363	0	0	9.2384	8.51686	9.2785	7.6168	10.2533	0	0	0	10.7245	0	0	9.5457	7.21554	0	9.06811	8.7783	9.53271	0	10.3988	8.40692	10.148	9.81145	9.85944	8.70925
Zinc transporter 6 (ZnT-6) (Solute carrier family 30 member 6)	SLC30A6	0	0	0	0	0	0	0	0	0	8.92555	0	0	0	7.05629	0	0	0	0	0	0	0	8.07016	0	0	0	8.80828	0	0	0	7.87653	0	0	0	0	7.6038	0	8.17796	8.05294	9.14974	0	9.04653	8.96017	0	0	0	0	0	0
CCR4-NOT transcription complex subunit 10	CNOT10	8.25898	0	0	0	0	0	0	9.24034	9.2449	0	8.3768	0	0	0	8.81779	0	7.8908	7.9085	0	0	0	0	0	0	0	0	0	0	0	0	0	0	7.82483	7.55324	0	8.30621	0	0	0	0	0	0	8.06512	0	7.84262	8.4052	0	0
Copper homeostasis protein cutC homolog	CUTC	8.41497	0	8.16195	0	0	0	0	0	0	0	8.61864	0	0	0	0	0	0	0	7.00363	8.87935	7.24905	8.84633	7.86937	0	0	9.09214	0	0	7.53246	8.49317	8.64858	0	0	8.82282	9.27651	0	7.30855	8.48891	0	8.55291	0	10.8575	7.96314	0	0	0	7.97873	0
Eukaryotic translation initiation factor 1A, X-chromosomal (eIF-1A X isoform) (eIF1A X isoform) (Eukaryotic translation initiation factor 4C) (eIF-4C)	EIF1AX	10.7925	10.8664	0	0	10.805	11.4188	0	11.1972	11.1486	11.389	10.312	11.0786	11.1598	10.0597	12.3775	10.8252	10.1482	11.6572	0	11.3438	11.7672	0	0	10.7293	12.4989	10.9279	11.4109	10.7471	11.672	11.2077	9.942	10.5827	11.3198	0	11.4701	11.6283	0	10.839	0	12.562	11.1694	10.5873	12.0376	11.1798	10.7097	11.0123	11.8546	13.2921
Carbonic anhydrase 5B, mitochondrial (EC 4.2.1.1) (Carbonate dehydratase VB) (Carbonic anhydrase VB) (CA-VB)	CA5B	0	0	0	0	0	0	0	0	0	0	0	0	0	0	0	0	0	0	7.04684	0	0	0	9.09316	7.67195	0	0	0	0	0	0	8.30575	8.52561	0	0	0	0	8.77342	0	0	0	0	0	0	0	0	0	0	0
Barrier-to-autointegration factor (Breakpoint cluster region protein 1) [Cleaved into: Barrier-to-autointegration factor, N-terminally processed]	BANF1	0	9.92978	9.63694	8.74087	8.36773	0	0	9.54785	10.3292	0	10.3105	0	0	9.10565	10.5445	0	0	0	0	0	0	0	0	0	7.79548	6.59377	9.2271	8.99936	0	9.33067	0	0	0	8.8014	7.34443	9.22934	0	9.24352	8.84279	0	8.65012	0	0	8.35203	0	10.0072	8.26413	9.00902
Rootletin (Ciliary rootlet coiled-coil protein)	CROCC	10.302	9.92358	0	0	0	0	8.61086	9.13262	9.47142	9.25837	9.57919	0	10.0468	0	11.183	10.5529	8.54475	9.70752	0	0	0	0	0	0	9.74324	8.39045	8.80153	9.70507	9.9321	0	0	0	10.324	0	0	8.57989	8.88089	0	9.14673	9.0582	9.65786	9.35979	10.5541	0	9.41682	9.43397	9.73414	9.39389
CXADR-like membrane protein (Adipocyte adhesion molecule) (Coxsackie- and adenovirus receptor-like membrane protein) (CAR-like membrane protein)	CLMP	0	0	0	0	0	9.6086	0	0	0	0	0	7.82633	0	0	0	0	0	0	0	0	0	8.63566	6.72266	0	9.06566	8.69212	8.30758	0	8.47424	8.11978	7.83545	6.93533	0	0	8.91885	8.01009	0	9.78092	10.5808	8.54408	0	7.99943	8.99296	9.0056	8.8036	8.49779	8.5151	9.56126
Dystrobrevin alpha (DTN-A) (Alpha-dystrobrevin) (Dystrophin-related protein 3)	DTNA	7.81503	0	0	0	0	0	0	0	0	0	0	0	0	0	0	9.11628	9.99164	9.20319	0	0	0	0	0	0	0	0	0	11.0397	0	0	0	0	8.14835	9.36678	0	0	0	0	0	6.07231	0	0	0	0	8.84634	5.97358	0	0
Cytochrome P450 7B1 (24-hydroxycholesterol 7-alpha-hydroxylase) (EC 1.14.14.26) (25/26-hydroxycholesterol 7-alpha-hydroxylase) (EC 1.14.14.29) (3-hydroxysteroid 7-alpha hydroxylase) (Oxysterol 7-alpha-hydroxylase)	CYP7B1	0	0	0	0	7.30887	0	0	0	0	0	0	0	0	0	0	0	0	0	7.58126	0	0	0	0	0	0	0	0	0	0	0	7.7211	7.98871	0	7.65652	0	0	9.30221	0	0	0	0	0	0	0	0	0	0	9.46532
Nucleoporin NUP35 (35 kDa nucleoporin) (Mitotic phosphoprotein 44) (MP-44) (Nuclear pore complex protein Nup53) (Nucleoporin NUP53)	NUP35	0	0	0	0	0	0	0	0	10.2952	0	0	0	0	0	11.0497	0	0	8.67175	0	0	0	0	0	0	0	0	0	0	0	0	0	0	7.72545	0	0	0	0	0	0	7.23588	0	0	0	0	7.88556	11.4623	8.48186	0
A-kinase anchor protein 11 (AKAP-11) (A-kinase anchor protein 220 kDa) (AKAP 220) (hAKAP220) (Protein kinase A-anchoring protein 11) (PRKA11)	AKAP11	0	0	0	0	0	0	0	0	0	0	0	0	0	0	0	0	0	0	0	0	0	0	0	0	0	0	0	0	6.39427	0	0	0	0	0	0	0	0	0	0	0	0	0	0	0	0	6.86339	0	0
Spermatogenesis-defective protein 39 homolog (hSPE-39) (VPS33B-interacting protein in apical-basolateral polarity regulator) (VPS33B-interacting protein in polarity and apical restriction)	VIPAS39	0	0	0	0	7.90597	0	7.41006	0	0	0	0	0	0	0	0	0	0	0	0	6.8436	7.92661	0	0	0	0	7.66747	0	0	0	8.00331	0	0	0	9.03557	0	0	0	0	0	0	7.6732	0	0	8.9371	0	0	0	0
Calcium/calmodulin-dependent protein kinase kinase 2 (CaM-KK 2) (CaM-kinase kinase 2) (CaMKK 2) (EC 2.7.11.17) (Calcium/calmodulin-dependent protein kinase kinase beta) (CaM-KK beta) (CaM-kinase kinase beta) (CaMKK beta)	CAMKK2	0	8.86568	0	0	0	0	0	0	0	0	0	0	0	0	0	0	9.94013	0	0	0	0	0	0	0	0	7.76782	7.81339	0	7.24204	0	0	0	0	6.70027	0	0	0	0	0	0	0	0	0	0	0	7.06399	0	0
Rho-related GTP-binding protein RhoJ (Ras-like protein family member 7B) (Tc10-like GTP-binding protein)	RHOJ	0	0	0	0	0	0	0	0	0	0	0	7.63146	0	0	0	0	0	8.08046	0	0	7.6205	0	0	0	0	0	0	0	0	0	0	0	7.61691	0	0	7.75274	0	0	0	0	0	0	7.16308	0	7.61541	8.35784	0	9.8096
Ensconsin (Epithelial microtubule-associated protein of 115 kDa) (E-MAP-115) (Microtubule-associated protein 7) (MAP-7)	MAP7	0	0	0	0	0	0	0	0	0	0	0	0	0	0	0	8.46927	0	0	0	0	8.9187	0	0	0	0	0	0	0	0	0	0	0	0	0	0	0	0	0	11.0427	0	0	0	9.00952	0	9.29986	8.46916	8.49029	11.1608
T-box transcription factor TBX15 (T-box protein 15) (T-box transcription factor TBX14) (T-box protein 14)	TBX15	0	0	0	0	0	0	0	0	0	0	0	0	0	0	0	0	0	0	0	0	0	0	0	7.0197	0	0	0	0	0	0	6.50673	0	0	0	0	0	0	0	0	0	8.61344	0	0	0	0	0	0	0
NADH dehydrogenase [ubiquinone] 1 alpha subcomplex subunit 2 (Complex I-B8) (CI-B8) (NADH-ubiquinone oxidoreductase B8 subunit)	NDUFA2	12.7666	8.77212	0	0	0	0	0	8.91086	8.04334	0	0	0	8.52931	0	8.66945	10.9807	13.3657	8.41234	0	0	0	0	0	0	0	0	0	8.95635	0	0	0	0	8.15629	0	8.63286	8.87092	0	0	0	0	7.70154	0	8.08419	0	8.87356	11.52	10.189	0
COMM domain-containing protein 4	COMMD4	0	0	0	0	0	0	0	10.2649	0	0	0	0	9.97316	0	0	0	0	0	0	0	0	0	0	0	0	0	0	8.15837	0	0	0	0	0	0	0	0	0	0	0	0	0	0	0	0	0	0	0	0
Leukocyte-associated immunoglobulin-like receptor 1 (LAIR-1) (hLAIR1) (CD antigen CD305)	LAIR1	0	0	0	0	8.85	0	9.24135	0	0	0	0	0	0	9.34378	0	0	0	0	0	0	0	0	0	0	8.52691	0	0	0	0	8.34037	0	0	0	0	0	0	0	0	0	0	8.39658	9.08948	8.53061	0	0	0	0	0
Visinin-like protein 1 (VILIP) (VLP-1) (Hippocalcin-like protein 3) (HLP3)	VSNL1	0	0	0	8.35764	0	0	0	0	0	0	0	0	0	0	0	0	13.8453	0	8.4877	0	0	0	0	8.28093	0	0	0	10.559	0	0	0	0	0	0	0	0	0	0	7.5208	0	6.36284	0	0	0	0	0	0	0
Endothelin-1 receptor (Endothelin receptor type A) (ET-A) (ETA-R) (hET-AR)	EDNRA	0	0	0	0	0	0	0	0	0	0	0	8.79153	0	0	0	0	0	0	7.13353	7.30861	0	8.68459	7.17703	0	8.59195	9.665	0	0	0	7.83164	7.5075	8.3201	0	0	10.0684	0	8.43473	9.76461	0	6.61758	0	0	0	8.59071	0	0	0	0
Ephrin type-A receptor 7 (EC 2.7.10.1) (EPH homology kinase 3) (EHK-3) (EPH-like kinase 11) (EK11) (hEK11)	EPHA7	0	8.83325	0	0	0	0	0	0	0	0	0	7.44743	7.56933	0	0	0	7.59875	0	0	0	9.6723	8.99874	0	0	0	9.50938	0	8.5402	7.65965	7.73399	0	0	8.41066	0	8.77835	7.8714	6.35868	0	0	0	0	0	0	0	0	0	0	0
E3 ubiquitin-protein ligase UHRF2 (EC 2.3.2.27) (Np95/ICBP90-like RING finger protein) (Np95-like RING finger protein) (Nuclear protein 97) (Nuclear zinc finger protein Np97) (RING finger protein 107) (RING-type E3 ubiquitin transferase UHRF2) (Ubiquitin-like PHD and RING finger domain-containing protein 2) (Ubiquitin-like-containing PHD and RING finger domains protein 2)	UHRF2	0	10.2471	0	0	0	0	0	0	0	0	0	0	0	0	0	0	0	0	0	0	0	0	0	0	0	9.89079	0	9.66585	0	8.24589	0	0	0	8.45786	0	8.2313	0	0	0	8.87207	0	0	0	0	8.39401	0	8.9536	0
Protein SCAF11 (CTD-associated SR protein 11) (Renal carcinoma antigen NY-REN-40) (SC35-interacting protein 1) (SR-related and CTD-associated factor 11) (SRSF2-interacting protein) (Serine/arginine-rich splicing factor 2-interacting protein) (Splicing factor, arginine/serine-rich 2-interacting protein) (Splicing regulatory protein 129) (SRrp129)	SCAF11	8.05051	0	0	0	7.55378	0	8.20097	0	0	0	9.37508	8.35288	9.4245	0	0	0	0	0	0	0	9.14604	8.43485	7.77699	0	8.58441	7.3471	9.17044	9.39255	8.86741	0	0	0	9.6357	0	0	0	0	8.93016	9.40712	8.14992	8.02432	8.74086	8.63875	7.59459	0	0	7.9945	0
Glucose 1,6-bisphosphate synthase (EC 2.7.1.106) (PMMLP) (Phosphoglucomutase-2-like 1)	PGM2L1	0	0	9.81427	10.757	10.4061	10.5778	8.87428	0	0	8.913	0	9.57546	0	10.9953	8.36141	0	11.5334	7.73785	9.57176	7.76694	0	8.78744	9.41199	10.5066	0	0	0	10.2126	0	0	10.3997	10.1185	0	9.48898	0	0	10.1776	8.47188	8.15378	7.96191	8.13127	8.76017	0	9.29893	0	0	0	0
Dynamin-binding protein (Scaffold protein Tuba)	DNMBP	0	0	0	0	0	0	0	0	0	0	8.87004	0	0	0	0	0	0	0	7.05451	0	0	0	0	0	0	0	0	0	0	0	0	0	0	8.0301	0	0	7.55515	0	0	0	0	0	0	0	0	0	8.89976	0
Endosome/lysosome-associated apoptosis and autophagy regulator family member 2 (Estrogen-induced gene 121-like protein) (hEIG121L)	ELAPOR2	0	0	0	0	0	0	8.72936	10.2221	10.0778	10.4263	9.33257	0	10.5536	0	0	0	0	7.90008	0	0	8.17969	9.07493	7.43576	8.01453	9.73604	0	8.66017	9.62689	8.67007	8.74642	0	0	8.50735	0	9.62267	8.60045	0	9.94468	0	9.33531	9.12743	8.69846	7.92942	9.32562	0	7.7188	9.95173	0
Tripartite motif-containing protein 5 (EC 2.3.2.27) (RING finger protein 88) (RING-type E3 ubiquitin transferase TRIM5)	TRIM5	0	0	0	0	0	0	0	0	0	0	0	0	0	0	0	0	0	0	0	0	0	0	0	0	0	0	0	0	0	0	0	0	0	0	0	0	0	0	0	0	0	0	0	0	0	0	0	0
General transcription factor 3C polypeptide 2 (TF3C-beta) (Transcription factor IIIC 110 kDa subunit) (TFIIIC 110 kDa subunit) (TFIIIC110) (Transcription factor IIIC subunit beta)	GTF3C2	0	0	0	0	0	0	0	0	0	10.7824	0	8.88438	0	0	0	0	0	0	0	0	9.87345	0	0	0	0	0	0	0	0	0	0	0	0	8.64641	0	0	0	10.6981	0	0	0	10.951	0	0	0	0	0	10.5701
Hexokinase-3 (EC 2.7.1.1) (Hexokinase type III) (HK III) (Hexokinase-C)	HK3	0	0	8.03286	7.72255	8.12657	8.25546	0	0	0	0	0	7.26243	0	9.36875	0	0	0	0	8.47712	7.90587	0	8.43958	8.73391	8.44421	0	0	0	0	0	7.06817	8.24489	8.75592	0	0	8.61919	0	7.35348	7.73361	0	0	8.37665	8.29758	0	8.86164	0	0	0	0
Amphiphysin	AMPH	0	0	0	0	0	0	0	0	0	0	0	0	0	0	0	0	11.8561	0	0	0	0	0	0	0	0	0	0	9.16179	8.22967	0	0	0	9.72114	0	0	0	0	0	8.56305	0	0	7.82203	0	7.98895	0	0	0	0
Transmembrane protein 126A	TMEM126A	9.82572	11.4882	0	0	0	0	0	11.8938	11.8009	0	0	0	11.3624	0	11.2525	0	10.2272	0	0	0	8.91734	0	9.33906	0	0	0	9.36861	10.9625	10.3676	0	0	0	10.6974	9.07893	0	9.22556	0	0	0	7.34673	0	0	9.66025	0	9.06303	11.7817	8.92311	11.2463
Transmembrane protein 179B	TMEM179B	0	0	0	0	10.6535	9.82786	9.92288	0	0	10.8498	0	9.60338	0	0	0	0	0	0	0	8.73474	0	10.489	9.89951	10.0731	11.5575	10.1864	0	0	0	10.6872	0	0	0	0	0	0	0	11.5219	11.018	10.4023	9.14635	9.87952	0	9.78778	0	0	0	10.5684
UDP-glucose 4-epimerase (EC 5.1.3.2) (Galactowaldenase) (UDP-N-acetylgalactosamine 4-epimerase) (UDP-GalNAc 4-epimerase) (UDP-N-acetylglucosamine 4-epimerase) (UDP-GlcNAc 4-epimerase) (EC 5.1.3.7) (UDP-galactose 4-epimerase)	GALE	0	0	9.25682	7.73355	0	0	0	0	0	0	0	0	0	8.03651	0	8.98763	0	0	10.4499	7.85301	0	0	7.82678	8.98213	0	0	0	0	0	0	9.05467	0	0	10.4768	6.46229	0	8.63638	0	0	0	0	0	0	0	0	0	9.55654	0
Adipogenesis regulatory factor (Adipogenesis factor rich in obesity) (Adipose most abundant gene transcript 2 protein) (Adipose-specific protein 2) (apM-2)	ADIRF	10.4485	9.66854	7.34588	7.13636	8.07605	0	8.48001	10.7793	10.3514	9.92586	0	7.61758	10.8412	0	0	0	0	10.0352	7.77611	0	9.946	11.746	7.46305	7.67561	9.92026	0	11.3348	8.919	10.1234	0	9.85771	9.33896	0	0	8.66352	9.39556	7.04441	9.67801	0	12.0495	10.3347	9.96987	8.66762	9.95739	7.82081	9.23245	9.4023	0
Serine/threonine-protein phosphatase 4 regulatory subunit 1	PPP4R1	0	0	0	5.18819	0	0	0	7.67619	0	0	0	0	0	0	7.63116	0	0	0	0	0	0	0	0	8.68723	7.84125	8.1449	6.54767	0	6.30721	6.36983	0	0	0	8.09188	8.20428	0	0	8.05587	0	0	7.93158	6.74154	0	8.38129	0	0	7.51269	0
[truncated: 633 more rows]
[truncated: 555 more columns]

## Sheet: SupplementaryTable2
Supplementary Table 2. Ranked protein expression in meningioma.
Rank	Protein	Gene	Average_log2_intensity	Protein_names
[truncated: 5,788 more rows]

## Sheet: SupplementaryTable3
Supplementary Table 3. Differentially expressed proteins in meningioma versus meninges.
[truncated: 5,789 more rows]

## Sheet: SupplementaryTable4
Supplementary Table 4. Top 3000 differentially expressed proteins in dog meningioma (log2 transformed protein intensities).
[truncated: 3,001 more rows]
[truncated: 46 more columns]

[truncated: 16 more sheets: SupplementaryTable5, SupplementaryTable6, SupplementaryTable7, SupplementaryTable8, SupplementaryTable9, SupplementaryTable10, SupplementaryTable11, SupplementaryTable12, SupplementaryTable13, SupplementaryTable14, SupplementaryTable15, SupplementaryTable16, SupplementaryTable17, SupplementaryTable18, SupplementaryTable19, SupplementaryTable20]
